# Supplementary material for: Access to (E)-δ-vinyl-homoallylic alcohols/ethers/pyrazoles by ring-opening nucleophilic substitution of cyclopropyl allylic alcohols
Source: Royal Society of Chemistry journal article supplement (doi:10.1039/d5qo00678c), 2025-01-01

## Supporting information

### Access to (*E*)- $\delta$ -Vinyl-Homoallylic Alcohols/Ethers/Pyrazoles by Ring-opening Nucleophilic Substitution of cyclopropyl allylic alcohols

Yulu Zhang, Ying Shao, Jiangtao Sun\* and Shengbiao Tang\*

E-mail: shengbiaotang@cczu.edu.cn, jtsun@cczu.edu.cn

General information

General procedure A for the preparation of substrates **1**

Table S1-S4

General procedure B for the preparation of **3**

General procedure C for the preparation of **5**

Preparation for the compound of **6-8**

<sup>1</sup>H NMR, <sup>13</sup>C NMR Spectra of all new compounds

## General information

All reactions were carried out using oven-dried tube with magnetic stirring under argon atmosphere unless otherwise noted. Anhydrous solvents were dried prior to use. Reagents were purchased from Energy Chemical and used without further purification. For column chromatography, 200-300 mesh silica gel was used. Thin layer chromatography (TLC) was performed on Silicycle 250 $\mu$ m silica gel 60Å plates. Visualization was accomplished with UV light (254 nm), Iodine, or Potassium Permanganate.

$^1\text{H}$  NMR and  $^{13}\text{C}$  NMR spectra were recorded on a Bruker 300 MHz (300 MHz for  $^1\text{H}$ ; 282 MHz for  $^{19}\text{F}$ ; 75 MHz for  $^{13}\text{C}$ ) spectrometers at ambient temperature. The chemical shifts ( $\delta$ ) are given in parts per million relative to  $\text{CDCl}_3$  (7.26 ppm for  $^1\text{H}$ ) or TMS (0 ppm for  $^1\text{H}$ ) and  $\text{CDCl}_3$  (77.16 ppm for  $^{13}\text{C}$ ). Coupling constants ( $J$ ) are reported in Hz, and multiplicity is described using the following abbreviations: s = singlet, d = doublet, t = triplet, q = quartet, m = multiplet, br = broad, or combinations thereof. HRMS were performed on Agilent 6540 Q-TOF mass spectrometer (ESI).

All pyrazoles/alcohols **2/4** are commercially available, purchased from Energy Chemical and used directly without further purification. All known vinyl cyclopropyl alcohols **1** were prepared according to the reported literatures.<sup>1</sup> The configuration of **1p** was determined by comparing the NMR spectra with the reported literature.<sup>2</sup> All new compounds have been characterized by  $^1\text{H}$  NMR,  $^{13}\text{C}$  NMR and HRMS.

## General procedure for the preparation of the substrates 1

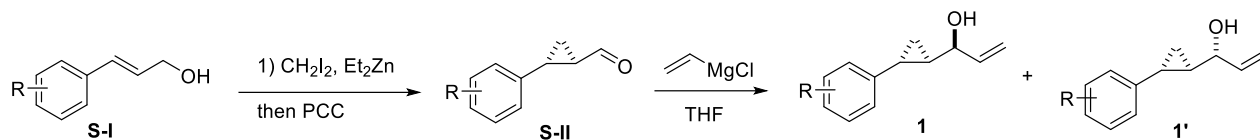

To a dried 250 mL flask were added  $\text{CH}_2\text{I}_2$  (20.0 mmol, 2.0 eq.) and  $\text{CH}_2\text{Cl}_2$  (100 mL). After cooling to 0 °C,  $\text{Et}_2\text{Zn}$  (1 M in hexane, 12.5 mmol, 1.25 eq.) was added. The resulting mixture was stirred at this temperature for 30 min. To another flask were added compound **S-I** (10.0 mmol, 1.0 eq.) and  $\text{CH}_2\text{Cl}_2$  (30 mL). After cooling to 0 °C,  $\text{Et}_2\text{Zn}$  (1 M in hexane, 12.5 mmol, 1.25 eq.) was added. The resulting mixture was stirred at this temperature for 30 min. This reaction mixture was then added to the reaction mixture in the 250 mL flask. After stirred at 0 °C for 30 min, the resulting mixture was allowed to warm to room temperature and then stirred for 18 h. Then, the reaction mixture was quenched with sat. aq.  $\text{NH}_4\text{Cl}$  and 1 M aq.  $\text{HCl}$ . The organic layer was separated. The aqueous layer was then extracted with  $\text{CH}_2\text{Cl}_2$  (2\*100 mL). The combined organic layer was dried over  $\text{MgSO}_4$  and concentrated in vacuo. The residue was direct used without further purification. To a solution of compound (10.0 mmol) in  $\text{CH}_2\text{Cl}_2$  (25 mL) was added PCC (15.0 mmol, 1.5 eq.) at room temperature under Ar atmosphere. After 1 h, the reaction mixture was filtered through a pad of Celite and the filtrate was concentrated in vacuo. The residue was purified by column chromatography on silica gel to afford aldehyde **S-II** as colorless oil.

To a flame dried flask was cooled to 0 °C and charged with compound **S-II** and dry THF (100 mL), the flask was backfilled with argon gas. Then, vinylmagnesium chloride (1.0 M in THF solution, 20.0 mmol, 2.0 eq.) was slowly added to the above solution of compound **S-II**. Then, the mixture was stirred at 0 °C for 1 h (monitored by TLC) and quenched with saturated aq.  $\text{NH}_4\text{Cl}$  (50 mL). The aqueous layer was extracted with  $\text{EtOAc}$  (50\*3) and the organic phase was dried with  $\text{Na}_2\text{SO}_4$ , filtered and concentrated in vacuo. The crude residue was purified by column chromatography on silica gel to give the diastereoisomer **1/1'** = 1:1. The new compounds as listed below:

### 1-(2-Phenylcyclopropyl)prop-2-en-1-ol (**1a**+**1a'**)

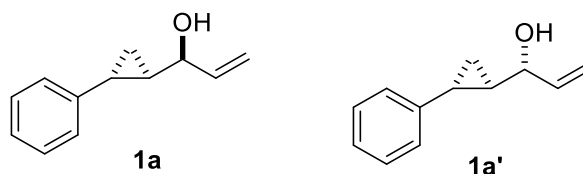

The title compound was prepared from the general procedure A, 3-phenylprop-2-en-1-ol (1.34 g, 10.0 mmol, 1.0 eq.),  $\text{CH}_2\text{I}_2$  (5.36 g, 20.0 mmol, 2.0 eq.),  $\text{Et}_2\text{Zn}$  (1 M in hexane, 12.5 mL, 1.25 eq.), vinylmagnesium chloride (1.0 M in THF, 20.0 mL, 2eq.) was used. Purified by silica gel column chromatography (eluent:  $\text{EtOAc/PE}$  = 1:5) furnished **1a** (696.4 mg, 40% yield over two steps) and **1a'** (696.0 mg, 40% yield over two steps) as colorless oil.

NMR data of **1a**:

**$^1\text{H}$  NMR** (300 MHz,  $\text{CDCl}_3$ )  $\delta$  7.35-7.00 (m, 5H), 6.12-5.87 (m, 1H), 5.28 (d,  $J$  = 17.2 Hz, 1H), 5.14 (d,  $J$  = 10.5 Hz, 1H), 3.76 (t,  $J$  = 6.6 Hz, 1H), 1.87 (dt,  $J$  = 8.7, 5.0 Hz, 1H), 1.78 (s, 1H), 1.40-1.27 (m, 1H), 1.12-0.94 (m, 2H).

**$^{13}\text{C}$  NMR** (75 MHz,  $\text{CDCl}_3$ )  $\delta$  142.5, 139.4, 128.5, 126.0, 125.8, 115.2, 76.1, 28.9, 21.3, 13.0.

NMR data of **1a'**:

**$^1\text{H}$  NMR** (300 MHz,  $\text{CDCl}_3$ )  $\delta$  7.37-6.97 (m, 5H), 6.10-5.85 (m, 1H), 5.30 (d,  $J$  = 17.2 Hz, 1H), 5.15 (d,  $J$  = 10.5 Hz, 1H), 3.77 (t,  $J$  = 6.7 Hz, 1H), 1.96 (dt,  $J$  = 8.5, 5.1 Hz, 1H), 1.76 (s, 1H), 1.41-1.29 (m, 1H), 1.04-0.90 (m, 2H).

**<sup>13</sup>C NMR** (75 MHz, CDCl<sub>3</sub>) δ 142.3, 139.6, 128.5, 126.1, 125.8, 115.2, 76.1, 28.7, 20.5, 13.7.

**HRMS** (ESI) m/z calculated for C<sub>12</sub>H<sub>15</sub>O [M+H]<sup>+</sup>: 175.1117, found: 175.1119.

***1-(2-(*p*-Tolyl)cyclopropyl)prop-2-en-1-ol (1b)***

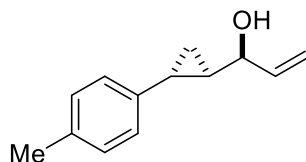

The title compound was prepared from the general procedure A, 3-(*p*-tolyl)prop-2-en-1-ol (1.48 g, 10.0 mmol, 1 eq.), CH<sub>2</sub>I<sub>2</sub> (5.36 g, 20.0 mmol, 2.0 eq.), Et<sub>2</sub>Zn (1 M in hexane, 12.5 mL, 1.25 eq.), vinylmagnesium chloride (1.0 M in THF, 20.0 mL, 2 eq.) was used. Purified by silica gel column chromatography (eluent: EtOAc/PE = 1:5) furnished **1b** (790.1 mg, 42% yield over two steps) as colorless oil.

**<sup>1</sup>H NMR** (400 MHz, CDCl<sub>3</sub>) δ 7.04 (d, *J* = 7.7 Hz, 2H), 6.94 (d, *J* = 7.8 Hz, 2H), 6.08-5.85 (m, 1H), 5.25 (d, *J* = 17.3 Hz, 1H), 5.10 (d, *J* = 10.5 Hz, 1H), 3.69 (t, *J* = 6.7 Hz, 1H), 2.37 (s, 1H), 2.28 (s, 3H), 1.80 (dt, *J* = 9.5, 5.0 Hz, 1H), 1.33-1.21 (m, 1H), 1.07-0.88 (m, 2H).

**<sup>13</sup>C NMR** (75 MHz, CDCl<sub>3</sub>) δ 139.6, 139.2, 135.1, 129.0, 125.9, 114.9, 76.0, 28.4, 21.0, 20.1, 13.5.

**HRMS** (ESI) m/z calculated for C<sub>13</sub>H<sub>17</sub>O [M+H]<sup>+</sup>: 189.1274, found: 189.1273.

***1-(2-(4-Isopropylphenyl)cyclopropyl)prop-2-en-1-ol (1c)***

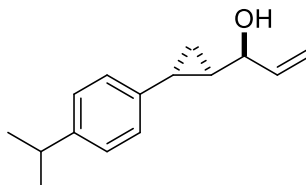

The title compound was prepared from the general procedure A, 3-(4-isopropylphenyl)prop-2-en-1-ol (1.76 g, 10.0 mmol, 1 eq.), CH<sub>2</sub>I<sub>2</sub> (5.36 g, 20.0 mmol, 2.0 eq.), Et<sub>2</sub>Zn (1 M in hexane, 12.5 mL, 1.25 eq.), vinylmagnesium chloride (1.0 M in THF, 20.0 mL, 2 eq.) was used. Purified by silica gel column chromatography (eluent: EtOAc/PE = 1:5) furnished **1c** (864.6 mg, 40% yield over two steps) as colorless oil.

**<sup>1</sup>H NMR** (300 MHz, CDCl<sub>3</sub>) δ 7.05 (d, *J* = 7.9 Hz, 2H), 6.93 (d, *J* = 7.8 Hz, 2H), 6.04-5.80 (m, 1H), 5.21 (d, *J* = 17.2 Hz, 1H), 5.06 (d, *J* = 10.4 Hz, 1H), 3.67 (t, *J* = 6.8 Hz, 1H), 2.79 (p, *J* = 7.0 Hz, 1H), 1.78 (dt, *J* = 9.5, 5.1 Hz, 1H), 1.62 (s, 1H), 1.30-1.20 (m, 1H), 1.16 (s, 3H), 1.14 (s, 3H), 1.02-0.82 (m, 2H).

**<sup>13</sup>C NMR** (75 MHz, CDCl<sub>3</sub>) δ 146.5, 139.61, 139.57, 126.5, 126.1, 115.2, 76.3, 33.8, 28.6, 24.2, 20.2, 13.6.

**HRMS** (ESI) m/z calculated for C<sub>15</sub>H<sub>21</sub>O [M+H]<sup>+</sup>: 217.1587, found: 217.1580.

***1-(2-(4-Methoxyphenyl)cyclopropyl)prop-2-en-1-ol (1d)***

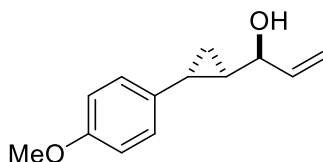



The title compound was prepared from the general procedure A, 3-(4-methoxyphenyl)prop-2-en-1-ol (1.64 g, 10.0 mmol, 1eq.), CH<sub>2</sub>I<sub>2</sub> (5.36 g, 20.0 mmol, 2.0 eq.), Et<sub>2</sub>Zn (1 M in hexane, 12.5 mL, 1.25 eq.), vinylmagnesium chloride (1.0 M in THF, 20.0 mL, 2eq.) was used. Purified by silica gel column chromatography (eluent: EtOAc/PE = 1:5) furnished **1d** (898.1 mg, 44% yield over two steps) as colorless oil.

**<sup>1</sup>H NMR** (300 MHz, CDCl<sub>3</sub>) δ 6.99 (d, *J* = 8.5 Hz, 2H), 6.80 (d, *J* = 8.6 Hz, 2H), 6.08-5.88 (m, 1H), 5.27 (d, *J* = 17.3 Hz, 1H), 5.13 (d, *J* = 9.9 Hz, 1H), 3.80-3.69 (m, 1H), 3.76 (s, 3H), 2.00-1.87 (m, 1H), 1.87-1.76 (m, 1H), 1.33-1.16 (m, 1H), 1.07-0.80 (m, 2H).

**<sup>13</sup>C NMR** (75 MHz, CDCl<sub>3</sub>) δ 157.9, 139.6, 134.2, 127.2, 115.1, 113.9, 76.3, 55.4, 28.3, 19.8, 13.3.

**HRMS** (ESI) *m/z* calculated for C<sub>13</sub>H<sub>17</sub>O<sub>2</sub> [M+H]<sup>+</sup>: 205.1223, found: 205.1225.

***1-(2-(2,4-Dimethylphenyl)cyclopropyl)prop-2-en-1-ol (1e)***

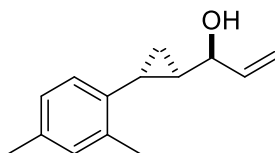

The title compound was prepared from the general procedure A, 3-(2,4-dimethylphenyl)prop-2-en-1-ol (1.62 g, 10.0 mmol, 1eq.), CH<sub>2</sub>I<sub>2</sub> (5.36 g, 20.0 mmol, 2.0 eq.), Et<sub>2</sub>Zn (1 M in hexane, 12.5 mL, 1.25 eq.), vinylmagnesium chloride (1.0 M in THF, 20.0 mL, 2eq.) was used. Purified by silica gel column chromatography (eluent: EtOAc/PE = 1:5) furnished **1e** (849.0 mg, 42% yield over two steps) as colorless oil.

**<sup>1</sup>H NMR** (300 MHz, CDCl<sub>3</sub>) δ 7.02-6.64 (m, 3H), 6.09-5.76 (m, 1H), 5.19 (d, *J* = 17.2 Hz, 1H), 5.04 (d, *J* = 10.5 Hz, 1H), 3.66 (t, *J* = 6.9 Hz, 1H), 2.38-2.03 (m, 1H), 2.25 (s, 3H), 2.17 (s, 3H), 1.74 (d, *J* = 8.5 Hz, 1H), 1.28-1.07 (m, 1H), 0.99-0.69 (m, 2H).

**<sup>13</sup>C NMR** (75 MHz, CDCl<sub>3</sub>) δ 139.8, 137.3, 136.7, 135.4, 130.6, 126.5, 125.6, 115.1, 76.3, 26.9, 20.9, 19.8, 18.1, 11.8.

**HRMS** (ESI) *m/z* calculated for C<sub>14</sub>H<sub>19</sub>O [M+H]<sup>+</sup>: 203.1430, found: 203.1437.

***1-(2-(2-(Benzyloxy)phenyl)cyclopropyl)prop-2-en-1-ol (1f)***

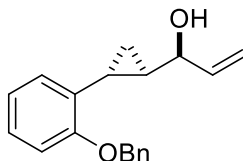

The title compound was prepared from the general procedure A, 3-(2-(benzyloxy)phenyl)prop-2-en-1-ol (2.40 g, 10.0 mmol, 1eq.), CH<sub>2</sub>I<sub>2</sub> (5.36 g, 20.0 mmol, 2.0 eq.), Et<sub>2</sub>Zn (1 M in hexane, 12.5 mL, 1.25 eq.), vinylmagnesium chloride (1.0 M in THF, 20.0 mL, 2eq.) was used. Purified by silica gel column chromatography (eluent: EtOAc/PE = 1:5) furnished **1f** (1.15 g, 41% yield over two steps) as colorless oil.

**<sup>1</sup>H NMR** (300 MHz, CDCl<sub>3</sub>) δ 7.45-7.22 (m, 5H), 7.05 (t, *J* = 7.6 Hz, 1H), 6.91-6.75 (m, 3H), 5.86-5.68 (m, 1H), 5.18-4.91 (m, 4H), 3.85 (t, *J* = 6.2 Hz, 1H), 2.12-1.84 (m, 2H), 1.24-1.09 (m, 1H), 1.02-0.81 (m, 2H).

**<sup>13</sup>C NMR** (75 MHz, CDCl<sub>3</sub>) δ 157.5, 138.9, 137.1, 130.6, 128.7, 128.2, 127.7, 126.9, 126.4, 121.0, 115.0, 111.7, 74.8, 70.4, 27.7, 14.3, 11.0.

**HRMS** (ESI) *m/z* calculated for C<sub>19</sub>H<sub>21</sub>O<sub>2</sub> [M+H]<sup>+</sup>: 281.1536, found: 281.1539.

**1-(2-(2-Methoxyphenyl)cyclopropyl)prop-2-en-1-ol (1g)**

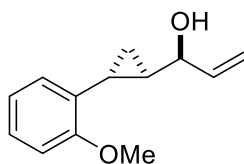

The title compound was prepared from the general procedure A, 3-(2-methoxyphenyl)prop-2-en-1-ol (1.64 g, 10.0 mmol, 1 eq.),  $\text{CH}_2\text{I}_2$  (5.36 g, 20.0 mmol, 2.0 eq.),  $\text{Et}_2\text{Zn}$  (1 M in hexane, 12.5 mL, 1.25 eq.), vinylmagnesium chloride (1.0 M in THF, 20.0 mL, 2eq.) was used. Purified by silica gel column chromatography (eluent: EtOAc/PE = 1:5) furnished **1g** (714.4 mg, 35% yield over two steps) as colorless oil.

**$^1\text{H}$  NMR** (300 MHz,  $\text{CDCl}_3$ )  $\delta$  7.15-7.02 (m, 1H), 6.91-6.71 (m, 3H), 5.96-5.73 (m, 1H), 5.25 (d,  $J$  = 17.2 Hz, 1H), 5.07 (d,  $J$  = 10.3 Hz, 1H), 3.94 (t,  $J$  = 6.3 Hz, 1H), 3.78 (s, 3H), 2.28 (s, 1H), 1.96 (dt,  $J$  = 8.8, 5.5 Hz, 1H), 1.24-1.11 (m, 1H), 0.99-0.84 (m, 2H).

**$^{13}\text{C}$  NMR** (75 MHz,  $\text{CDCl}_3$ )  $\delta$  158.3, 138.9, 130.2, 127.0, 126.5, 120.7, 115.1, 110.2, 74.7, 55.5, 27.2, 14.1, 11.1.

**HRMS** (ESI)  $m/z$  calculated for  $\text{C}_{13}\text{H}_{17}\text{O}_2$   $[\text{M}+\text{H}]^+$ : 205.1223, found: 205.1225.

**1-(2-(4-Chlorophenyl)cyclopropyl)prop-2-en-1-ol (1h)**

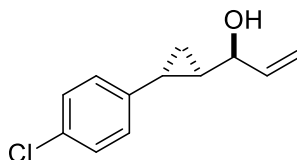

The title compound was prepared from the general procedure A, 3-(4-chlorophenyl)prop-2-en-1-ol (1.68 g, 10.0 mmol, 1 eq.),  $\text{CH}_2\text{I}_2$  (5.36 g, 20.0 mmol, 2.0 eq.),  $\text{Et}_2\text{Zn}$  (1 M in hexane, 12.5 mL, 1.25 eq.), vinylmagnesium chloride (1.0 M in THF, 20.0 mL, 2eq.) was used. Purified by silica gel column chromatography (eluent: EtOAc/PE = 1:5) furnished **1h** (811.5 mg, 39% yield over two steps) as colorless oil.

**$^1\text{H}$  NMR** (300 MHz,  $\text{CDCl}_3$ )  $\delta$  7.28-7.17 (m, 2H), 7.01 (d,  $J$  = 8.5 Hz, 2H), 6.07-5.88 (m, 1H), 5.30 (d,  $J$  = 17.2 Hz, 1H), 5.17 (d,  $J$  = 10.4 Hz, 1H), 3.78 (t,  $J$  = 6.7 Hz, 1H), 1.95 (dt,  $J$  = 9.3, 5.0 Hz, 1H), 1.67 (s, 1H), 1.34-1.24 (m, 1H), 1.05-0.86 (m, 2H).

**$^{13}\text{C}$  NMR** (75 MHz,  $\text{CDCl}_3$ )  $\delta$  141.1, 139.3, 131.4, 128.5, 127.4, 115.4, 75.9, 28.9, 20.8, 13.0.

**HRMS** (ESI)  $m/z$  calculated for  $\text{C}_{12}\text{H}_{14}\text{ClO}$   $[\text{M}+\text{H}]^+$ : 209.0728, found: 209.0723.

**1-(2-(4-(Trifluoromethyl)phenyl)cyclopropyl)prop-2-en-1-ol (1i)**

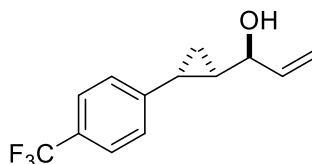

The title compound was prepared from the general procedure A, 3-(4-(trifluoromethyl)phenyl)prop-2-en-1-ol (2.02 g, 1 eq.),  $\text{CH}_2\text{I}_2$  (5.36 g, 20.0 mmol, 2.0 eq.),  $\text{Et}_2\text{Zn}$  (1 M in hexane, 12.5 mL, 1.25 eq.), vinylmagnesium chloride (1.0 M in THF, 20.0 mL, 2eq.) was used. Purified by silica gel column chromatography (eluent: EtOAc/PE = 1:5) furnished **1i** (798.9 mg, 33% yield over two steps) as colorless oil.

**<sup>1</sup>H NMR** (300 MHz, CDCl<sub>3</sub>) δ 7.50 (d, *J* = 8.0 Hz, 2H), 7.15 (d, *J* = 8.0 Hz, 2H), 6.11-5.86 (m, 1H), 5.29 (d, *J* = 17.2 Hz, 1H), 5.16 (d, *J* = 10.4 Hz, 1H), 3.83 (t, *J* = 6.6 Hz, 1H), 1.93 (dt, *J* = 9.4, 5.0 Hz, 1H), 1.77 (s, 1H), 1.46-1.30 (m, 1H), 1.22-0.99 (m, 2H).

**<sup>13</sup>C NMR** (75 MHz, CDCl<sub>3</sub>) δ 146.7, 139.3, 128.1 (q, *J* = 32.4 Hz), 126.2, 125.40 (q, *J* = 3.8 Hz), 122.6, 115.6, 75.6, 29.4, 20.3, 14.2.

**<sup>19</sup>F NMR** (282 MHz, CDCl<sub>3</sub>) δ -62.3.

**HRMS** (ESI) *m/z* calculated for C<sub>13</sub>H<sub>14</sub>F<sub>3</sub>O [M+H]<sup>+</sup>: 243.0991, found: 243.0994.

***1-(2-(2-Bromophenyl)cyclopropyl)prop-2-en-1-ol (1j)***

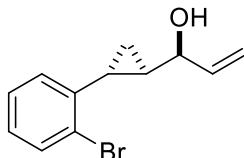

The title compound was prepared from the general procedure A, 3-(2-bromophenyl)prop-2-en-1-ol (2.12 g, 10.0 mmol, 1eq.), CH<sub>2</sub>I<sub>2</sub> (5.36 g, 20.0 mmol, 2.0 eq.), Et<sub>2</sub>Zn (1 M in hexane, 12.5 mL, 1.25 eq.), vinylmagnesium chloride (1.0 M in THF, 20.0 mL, 2eq.) was used. Purified by silica gel column chromatography (eluent: EtOAc/PE = 1:5) furnished **1j** (806.4 mg, 32% yield over two steps) as colorless oil.

**<sup>1</sup>H NMR** (300 MHz, CDCl<sub>3</sub>) δ 7.53 (d, *J* = 8.0 Hz, 1H), 7.36-6.80 (m, 3H), 6.24-5.85 (m, 1H), 5.32 (d, *J* = 17.2 Hz, 1H), 5.16 (d, *J* = 10.5 Hz, 1H), 3.96 (t, *J* = 6.3 Hz, 1H), 2.39-1.90 (m, 2H), 1.42-1.19 (m, 1H), 1.19-0.89 (m, 2H).

**<sup>13</sup>C NMR** (75 MHz, CDCl<sub>3</sub>) δ 141.0, 139.4, 132.6, 127.5, 127.4, 126.8, 125.8, 115.3, 75.0, 28.2, 20.8, 12.2.

**HRMS** (ESI) *m/z* calculated for C<sub>12</sub>H<sub>14</sub>BrO [M+H]<sup>+</sup>: 253.0223, found: 253.0227.

***1-(2-(2-Bromo-4,5-dimethoxyphenyl)cyclopropyl)prop-2-en-1-ol (1k)***

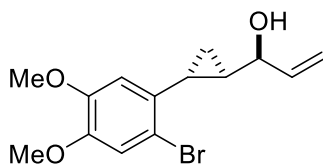

The title compound was prepared from the general procedure A, 3-(2-bromo-4,5-dimethoxyphenyl)prop-2-en-1-ol (2.72 g, 10.0 mmol, 1eq.), CH<sub>2</sub>I<sub>2</sub> (5.36 g, 20.0 mmol, 2.0 eq.), Et<sub>2</sub>Zn (1 M in hexane, 12.5 mL, 1.25 eq.), vinylmagnesium chloride (1.0 M in THF, 20.0 mL, 2eq.) was used. Purified by silica gel column chromatography (eluent: EtOAc/PE = 1:5) furnished **1k** (1.06 g, 34% yield over two steps) as colorless oil.

**<sup>1</sup>H NMR** (300 MHz, CDCl<sub>3</sub>) δ 7.02 (s, 1H), 6.45 (s, 1H), 6.12-5.94 (m, 1H), 5.32 (d, *J* = 17.2 Hz, 1H), 5.17 (d, *J* = 10.5 Hz, 1H), 3.97 (t, *J* = 6.3 Hz, 1H), 3.84 (s, 3H), 3.82 (s, 3H), 2.11 (dt, *J* = 8.5, 5.2 Hz, 1H), 2.01 (s, 1H), 1.32-1.20 (m, 1H), 1.15-1.02 (m, 1H), 1.01-0.90 (m, 1H).

**<sup>13</sup>C NMR** (75 MHz, CDCl<sub>3</sub>) δ 148.5, 147.9, 139.4, 132.9, 115.6, 115.5, 115.3, 110.1, 74.9, 56.3, 56.1, 28.0, 20.5, 12.0.

**HRMS** (ESI) *m/z* calculated for C<sub>14</sub>H<sub>18</sub>BrO<sub>3</sub> [M+H]<sup>+</sup>: 313.0434, found: 313.0437.

**1-(2-(Naphthalen-2-yl)cyclopropyl)prop-2-en-1-ol (1l)**

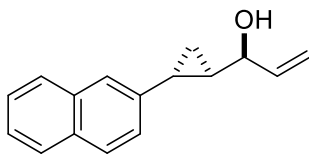

The title compound was prepared from the general procedure A, 3-(naphthalen-2-yl)prop-2-en-1-ol (1.84 g, 10.0 mmol, 1eq.), CH<sub>2</sub>I<sub>2</sub> (5.36 g, 20.0 mmol, 2.0 eq.), Et<sub>2</sub>Zn (1 M in hexane, 12.5 mL, 1.25 eq.), vinylmagnesium chloride (1.0 M in THF, 20.0 mL, 2eq.) was used. Purified by silica gel column chromatography (eluent: EtOAc/PE = 1:5) furnished **1l** (851.7 mg, 38% yield over two steps) as colorless oil.

**<sup>1</sup>H NMR** (300 MHz, CDCl<sub>3</sub>) δ 7.83-7.68 (m, 3H), 7.56-7.34 (m, 3H), 7.17 (d, *J* = 8.5 Hz, 1H), 6.11-5.91 (m, 1H), 5.30 (d, *J* = 16.3 Hz, 1H), 5.15 (d, *J* = 10.8 Hz, 1H), 3.80 (t, *J* = 6.7 Hz, 1H), 2.09-1.98 (m, 1H), 1.86 (s, 1H), 1.50-1.35 (m, 1H), 1.21-1.04 (m, 2H).

**<sup>13</sup>C NMR** (75 MHz, CDCl<sub>3</sub>) δ 139.8, 139.5, 133.6, 132.1, 128.1, 127.7, 127.4, 126.2, 125.2, 124.9, 124.2, 115.3, 76.1, 28.8, 20.7, 13.7.

**HRMS** (ESI) *m/z* calculated for C<sub>16</sub>H<sub>17</sub>O [M+H]<sup>+</sup>: 225.1274, found: 225.1279.

**1-(2-(6-Bromobenzo[d][1,3]dioxol-5-yl)cyclopropyl)prop-2-en-1-ol (1m)**

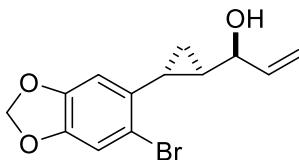

The title compound was prepared from the general procedure A, 3-(6-bromobenzo[d][1,3]dioxol-5-yl)prop-2-en-1-ol (2.56 g, 10.0 mmol, 1eq.), CH<sub>2</sub>I<sub>2</sub> (5.36 g, 20.0 mmol, 2.0 eq.), Et<sub>2</sub>Zn (1 M in hexane, 12.5 mL, 1.25 eq.), vinylmagnesium chloride (1.0 M in THF, 20.0 mL, 2eq.) was used. Purified by silica gel column chromatography (eluent: EtOAc/PE = 1:5) furnished **1m** (1.27 g, 43% yield over two steps) as colorless oil.

**<sup>1</sup>H NMR** (300 MHz, CDCl<sub>3</sub>) δ 7.00 (s, 1H), 6.46 (s, 1H), 6.07-5.92 (m, 1H), 5.93 (s, 2H), 5.32 (dt, *J* = 17.3, 1.5 Hz, 1H), 5.17 (dt, *J* = 10.4, 1.4 Hz, 1H), 4.04-3.86 (m, 1H), 2.09 (dt, *J* = 8.8, 5.2 Hz, 1H), 1.81 (d, *J* = 4.4 Hz, 1H), 1.30-1.17 (m, 1H), 1.14-1.01 (m, 1H), 0.95-0.84 (m, 1H).

**<sup>13</sup>C NMR** (75 MHz, CDCl<sub>3</sub>) δ 147.5, 146.6, 139.3, 134.2, 115.9, 115.4, 112.7, 107.2, 101.7, 75.0, 28.1, 20.9, 12.1.

**HRMS** (ESI) *m/z* calculated for C<sub>13</sub>H<sub>14</sub>BrO<sub>3</sub> [M+H]<sup>+</sup>: 297.0121, found: 297.0118.

**1-(2-Phenylcyclopropyl)propan-1-ol (1p)**

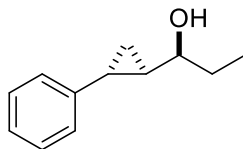

The title compound was prepared from the general procedure A, 3-phenylprop-2-en-1-ol (1.34 g, 10.0 mmol, 1eq.), CH<sub>2</sub>I<sub>2</sub> (5.36 g, 20.0 mmol, 2.0 eq.), Et<sub>2</sub>Zn (1 M in hexane, 12.5 mL, 1.25 eq.), vinylmagnesium chloride (1.0 M in THF, 20.0 mL, 2eq.) was used. Purified by silica gel column chromatography (eluent: EtOAc/PE = 1:5) furnished **1p** (845.4 mg, 48% yield over two steps) as colorless oil.

**<sup>1</sup>H NMR** (300 MHz, CDCl<sub>3</sub>) δ 7.31-7.21 (m, 2H), 7.20-7.11 (m, 1H), 7.11-7.00 (m, 2H), 3.08 (dt, *J* = 8.1, 6.3 Hz, 1H), 1.82 (dt, *J* = 9.2, 5.0 Hz, 1H), 1.74-1.61 (m, 3H), 1.30-1.17 (m, 1H), 1.06-0.91 (m, 5H).

**<sup>13</sup>C NMR** (75 MHz, CDCl<sub>3</sub>) δ 142.5, 128.5, 125.9, 125.7, 77.2, 30.4, 29.5, 21.3, 13.3, 10.3.

The NMR data was consistent with the reported literature.<sup>2</sup>

**Table S1.** Screening of the Bronsted acids to **3aa**

| entry | Cat. (mol%)                   | Yield (%) |
|-------|-------------------------------|-----------|
| 1     | TfOH (1eq.)                   | 15%       |
| 2     | TfOH(50 mol%)                 | trace     |
| 3     | HBr (50 mol%)                 | trace     |
| 4     | AcOH (50 mol%)                | 0%        |
| 5     | PhCO <sub>2</sub> H (50 mol%) | 0%        |
| 6     | TsOH (50 mol%)                | 50%       |
| 7     | TsOH (1eq.)                   | 61%       |
| 8     | TFA (50 mol%)                 | 45%       |

**Table S2.** Screening of the Bronsted acids to **5a**

| entry | Cat. (mol%)                   | Yield (%) |
|-------|-------------------------------|-----------|
| 1     | TfOH (1eq.)                   | 55%       |
| 2     | TfOH(50 mol%)                 | 30%       |
| 3     | HBr (50 mol%)                 | 12%       |
| 4     | AcOH (50 mol%)                | trace     |
| 5     | PhCO <sub>2</sub> H (50 mol%) | trace     |
| 6     | TsOH (1 eq.)                  | 51        |
| 7     | TFA (1 eq.)                   | 46        |

**Table S3.** Testing of the loading of catalyst for the synthesis of **3aa**

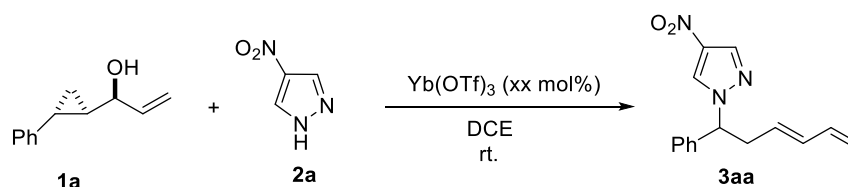

| entry | Yb(OTf) <sub>3</sub> (xx mol%) | Yield (%) |
|-------|--------------------------------|-----------|
| 1     | 10 mol%, 24 h                  | 80        |
| 2     | 15 mol%, 24 h                  | 82        |
| 3     | 20 mol%, 12 h                  | 82        |
| 4     | 50 mol%, 6 h                   | 82        |

**Table S4.** Testing of the loading of catalyst for the synthesis of **5a**

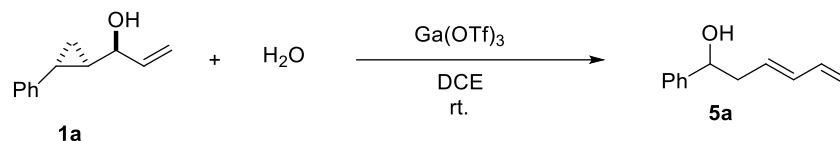

| entry | Ga(OTf) <sub>3</sub> (xx mol%) | Yield of <b>5a</b> (%) |
|-------|--------------------------------|------------------------|
| 1     | 10 mol%, 24 h                  | 20%                    |
| 2     | 20 mol%, 24 h                  | 42%                    |
| 3     | 30 mol%, 24 h                  | 65%                    |
| 4     | 50 mol%, 12 h                  | 65%                    |
| 5     | 60 mol%, 12 h                  | 64%                    |

**General procedure B for synthesis of 3aa-3na, 3ab-3aj**

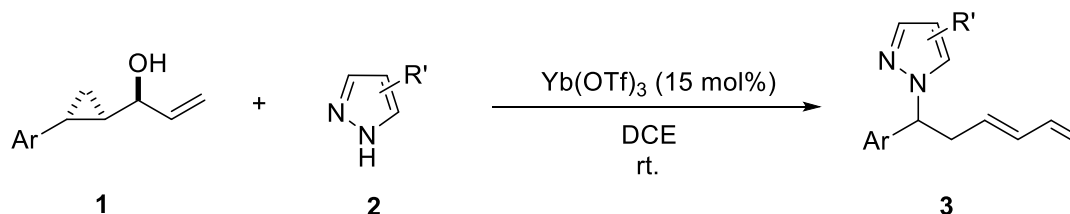

**General procedure B:** A 10 mL dry tube equipped with a stir bar was charged with allylic alcohols **1** (0.1 mmol, 1.0 eq.), pyrazoles **2** (0.15 mmol, 1.5 eq.), Yb(OTf)<sub>3</sub> (15 mol%) and dry DCE (2.0 mL). The reaction mixture was stirred at room temperature for 12 hours. After completion of the reaction, the reaction mixture was concentrated under reduced pressure, then 2.0 ml of water was added, and the reaction solution was extracted with ethyl acetate (3 x 5 mL), the combined organic layers were dried over anhydrous magnesium sulfate, filtered and evaporated under reduced pressure. The remaining residue was purified by column chromatography on silica gel to afford the corresponding products (**3aa-3na**, **3ab-3aj**).

**(E)-4-Nitro-1-(1-phenylhexa-3,5-dien-1-yl)-1H-pyrazole (3aa)**

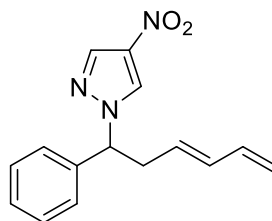

The title compound was prepared from **1a** (17.4 mg, 0.1 mmol, 1 eq.) and **2a** (17.0 mg, 0.15 mmol, 1.5 eq.) via general procedure B. Purified by silica gel column chromatography (eluent: EtOAc/PE = 1:10) furnished **3aa** (22.1 mg, 82%)

yield) as yellow oil.

**<sup>1</sup>H NMR** (300 MHz, CDCl<sub>3</sub>) δ 8.03 (s, 1H), 8.02 (s, 1H), 7.38-7.21 (m, 5H), 6.23-5.95 (m, 2H), 5.42 (dt, *J* = 14.3, 7.1 Hz, 1H), 5.23 (t, 1H), 5.14-4.88 (m, 2H), 3.17 (dt, *J* = 15.6, 8.1 Hz, 1H), 2.89 (dt, *J* = 14.2, 6.8 Hz, 1H).

**<sup>13</sup>C NMR** (75 MHz, CDCl<sub>3</sub>) δ 137.9, 136.3, 135.9, 135.8, 135.1, 129.3, 129.1, 128.1, 127.9, 127.2, 117.4, 67.8, 38.0.

**HRMS** (ESI) *m/z* calculated for C<sub>15</sub>H<sub>16</sub>N<sub>3</sub>O<sub>2</sub> [M+H]<sup>+</sup>: 270.1237, found: 270.1238.

***(E)*-4-Nitro-1-(1-(*p*-tolyl)hexa-3,5-dien-1-yl)-1H-pyrazole (3ba)**

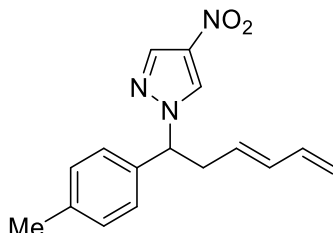

The title compound was prepared from **1b** (18.8 mg, 0.1 mmol, 1 eq.) and **2a** (17.0 mg, 0.15 mmol, 1.5 eq.) via general procedure B. Purified by silica gel column chromatography (eluent: EtOAc/PE = 1:10) furnished **3ba** (22.7 mg, 80% yield) as yellow oil.

**<sup>1</sup>H NMR** (300 MHz, CDCl<sub>3</sub>) δ 8.09 (s, 1H), 8.05 (s, 1H), 7.26-7.16 (m, 4H), 6.33-6.01 (m, 2H), 5.48 (dt, *J* = 14.4, 7.2 Hz, 1H), 5.27 (t, 1H), 5.12 (d, *J* = 16.1 Hz, 1H), 5.03 (d, *J* = 10.4 Hz, 1H), 3.22 (dt, *J* = 15.1, 8.0 Hz, 1H), 3.03-2.88 (m, 1H), 2.35 (s, 3H).

**<sup>13</sup>C NMR** (75 MHz, CDCl<sub>3</sub>) δ 139.2, 136.4, 135.9, 135.0, 134.8, 130.0, 128.1, 127.9, 127.2, 117.4, 67.5, 37.9, 21.3.

**HRMS** (ESI) *m/z* calculated for C<sub>16</sub>H<sub>18</sub>N<sub>3</sub>O<sub>2</sub> [M+H]<sup>+</sup>: 280.1394, found: 280.1390.

***(E)*-1-(1-(4-Isopropylphenyl)hexa-3,5-dien-1-yl)-4-nitro-1H-pyrazole (3ca)**

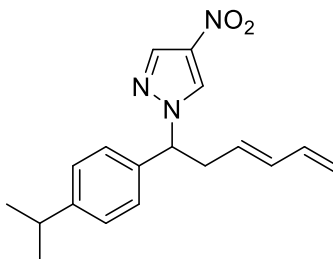

The title compound was prepared from **1c** (21.6 mg, 0.1 mmol, 1 eq.) and **2a** (17.0 mg, 0.15 mmol, 1.5 eq.) via general procedure B. Purified by silica gel column chromatography (eluent: EtOAc/PE = 1:15) furnished **3ca** (24.0 mg, 77% yield) as colorless oil.

**<sup>1</sup>H NMR** (300 MHz, CDCl<sub>3</sub>) δ 8.01 (d, *J* = 6.2 Hz, 2H), 7.17 (s, 4H), 6.26-5.93 (m, 2H), 5.51-5.32 (m, 1H), 5.21 (t, 1H), 5.04 (d, *J* = 16.2 Hz, 1H), 4.95 (d, *J* = 10.3 Hz, 1H), 3.15 (dt, *J* = 15.7, 8.1 Hz, 1H), 2.97-2.75 (m, 2H), 1.17 (d, *J* = 7.0 Hz, 6H).

**<sup>13</sup>C NMR** (75 MHz, CDCl<sub>3</sub>) δ 150.0, 136.4, 135.8, 135.2, 135.0, 128.1, 128.0, 127.34, 127.29, 127.2, 117.3, 67.6, 37.9, 33.9, 24.0.

**HRMS** (ESI) *m/z* calculated for C<sub>18</sub>H<sub>22</sub>N<sub>3</sub>O<sub>2</sub> [M+H]<sup>+</sup>: 312.1707, found: 312.1710.

***(E)*-1-(1-(4-Methoxyphenyl)hexa-3,5-dien-1-yl)-4-nitro-1H-pyrazole (3da)**

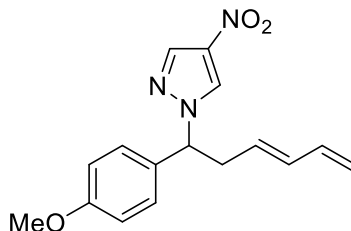

The title compound was prepared from **1d** (20.4 mg, 0.1 mmol, 1 eq.) and **2a** (17.0 mg, 0.15 mmol, 1.5 eq.) via general procedure B. Purified by silica gel column chromatography (eluent: EtOAc/PE = 1:10) furnished **3da** (21.2 mg, 71% yield) as yellow oil.

**<sup>1</sup>H NMR** (300 MHz, CDCl<sub>3</sub>) δ 8.09 (s, 1H), 8.04 (s, 1H), 7.28 (d, *J* = 8.7 Hz, 2H), 6.91 (d, *J* = 8.7 Hz, 2H), 6.34-5.98 (m, 2H), 5.48 (dt, *J* = 14.3, 7.1 Hz, 1H), 5.25 (t, *J* = 7.7 Hz, 1H), 5.12 (d, *J* = 16.5 Hz, 1H), 5.03 (d, *J* = 10.4 Hz, 1H), 3.81 (s, 3H), 3.22 (dt, *J* = 15.2, 7.9 Hz, 1H), 2.94 (dt, *J* = 14.3, 7.0 Hz, 1H).

**<sup>13</sup>C NMR** (75 MHz, CDCl<sub>3</sub>) δ 160.1, 136.4, 135.9, 135.0, 129.7, 128.8, 128.7, 128.1, 127.8, 117.4, 114.6, 67.2, 55.5, 38.0.

**HRMS** (ESI) *m/z* calculated for C<sub>16</sub>H<sub>18</sub>N<sub>3</sub>O<sub>3</sub> [M+H]<sup>+</sup>: 300.1343, found: 300.1348.

***(E)-1-(1-(2,4-Dimethylphenyl)hexa-3,5-dien-1-yl)-4-nitro-1H-pyrazole (3ea)***

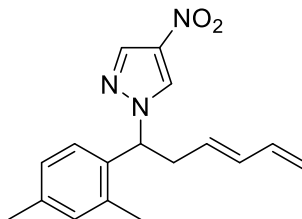

The title compound was prepared from **1e** (20.2 mg, 0.1 mmol, 1 eq.) and **2a** (17.0 mg, 0.15 mmol, 1.5 eq.) via general procedure B. Purified by silica gel column chromatography (eluent: EtOAc/PE = 1:10) furnished **3ea** (21.4 mg, 72% yield) as colorless oil.

**<sup>1</sup>H NMR** (300 MHz, CDCl<sub>3</sub>) δ 8.08 (s, 1H), 7.93 (s, 1H), 7.33-7.24 (m, 1H), 7.13-7.01 (m, 2H), 6.32-6.04 (m, 2H), 5.64-5.45 (m, 2H), 5.13 (d, *J* = 15.6 Hz, 1H), 5.03 (d, *J* = 8.9 Hz, 1H), 3.18 (dt, *J* = 15.3, 7.8 Hz, 1H), 2.93 (dt, *J* = 14.5, 7.0 Hz, 1H), 2.32 (s, 3H), 2.25 (s, 3H).

**<sup>13</sup>C NMR** (75 MHz, CDCl<sub>3</sub>) δ 139.1, 136.5, 136.4, 135.7, 134.9, 132.3, 132.2, 128.2, 127.7, 127.6, 126.3, 117.3, 63.5, 37.7, 21.2, 19.3.

**HRMS** (ESI) *m/z* calculated for C<sub>17</sub>H<sub>20</sub>N<sub>3</sub>O<sub>2</sub> [M+H]<sup>+</sup>: 298.1550, found: 298.1557.

***(E)-1-(1-(2-(Benzyloxy)phenyl)hexa-3,5-dien-1-yl)-4-nitro-1H-pyrazole (3fa)***

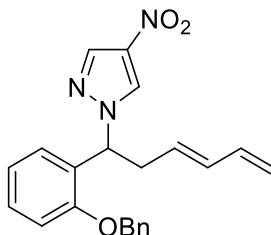



The title compound was prepared from **1f** (28.0 mg, 0.1 mmol, 1 eq.) and **2a** (17.0 mg, 0.15 mmol, 1.5 eq.) via general procedure B. Purified by silica gel column chromatography (eluent: EtOAc/PE = 1:10) furnished **3fa** (29.3 mg, 78% yield) as colorless oil.

**<sup>1</sup>H NMR** (300 MHz, CDCl<sub>3</sub>) δ 8.08 (s, 1H), 8.01 (s, 1H), 7.51-7.31 (m, 7H), 7.12-6.98 (m, 2H), 6.33-6.00 (m, 2H), 5.74 (dd, *J* = 9.1, 6.1 Hz, 1H), 5.51 (dt, *J* = 14.5, 7.1 Hz, 1H), 5.18-4.96 (m, 4H), 3.25 (dt, *J* = 15.9, 8.3 Hz, 1H), 2.98 (dt, *J* = 14.0, 6.6 Hz, 1H).

**<sup>13</sup>C NMR** (101 MHz, CDCl<sub>3</sub>) δ 155.9, 136.4, 136.1, 135.8, 135.1, 134.8, 130.2, 129.1, 129.0, 128.6, 128.5, 127.9, 127.7, 126.1, 121.3, 117.1, 112.2, 70.6, 61.1, 36.2.

**HRMS** (ESI) *m/z* calculated for C<sub>22</sub>H<sub>22</sub>N<sub>3</sub>O<sub>3</sub> [M+H]<sup>+</sup>: 376.1656, found: 376.1659.

**(E)-1-(1-(2-Methoxyphenyl)hexa-3,5-dien-1-yl)-4-nitro-1H-pyrazole (3ga)**

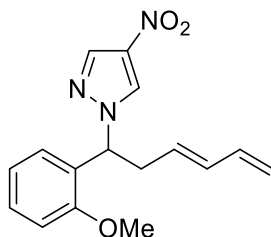

The title compound was prepared from **1g** (20.4 mg, 0.1 mmol, 1 eq.) and **2a** (17.0 mg, 0.15 mmol, 1.5 eq.) via general procedure B. Purified by silica gel column chromatography (eluent: EtOAc/PE = 1:10) furnished **3ga** (20.3 mg, 68% yield) as yellow oil.

**<sup>1</sup>H NMR** (300 MHz, CDCl<sub>3</sub>) δ 8.05 (s, 1H), 7.99 (s, 1H), 7.36-7.21 (m, 2H), 6.92 (t, *J* = 7.6 Hz, 1H), 6.84 (d, *J* = 8.2 Hz, 1H), 6.23-5.93 (m, 2H), 5.69 (dd, *J* = 9.2, 6.2 Hz, 1H), 5.44 (dt, *J* = 14.4, 7.1 Hz, 1H), 5.04 (d, *J* = 17.1 Hz, 1H), 4.94 (d, *J* = 9.6 Hz, 1H), 3.77 (s, 3H), 3.17 (dt, *J* = 15.9, 8.4 Hz, 1H), 2.86 (dt, *J* = 14.0, 6.5 Hz, 1H).

**<sup>13</sup>C NMR** (75 MHz, CDCl<sub>3</sub>) δ 156.7, 136.5, 135.8, 134.7, 130.2, 128.7, 128.6, 127.6, 126.0, 121.1, 117.1, 111.0, 60.9, 55.7, 36.5.

**HRMS** (ESI) *m/z* calculated for C<sub>16</sub>H<sub>18</sub>N<sub>3</sub>O<sub>3</sub> [M+H]<sup>+</sup>: 300.1343, found: 300.1348.

**(E)-1-(1-(4-Chlorophenyl)hexa-3,5-dien-1-yl)-4-nitro-1H-pyrazole (3ha)**

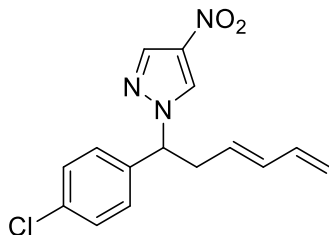

The title compound was prepared from **1h** (20.8 mg, 0.1 mmol, 1 eq.) and **2a** (17.0 mg, 0.15 mmol, 1.5 eq.) via general procedure B. Purified by silica gel column chromatography (eluent: EtOAc/PE = 1:10) furnished **3ha** (16.7 mg, 55% yield) as yellow oil.

**<sup>1</sup>H NMR** (300 MHz, CDCl<sub>3</sub>) δ 8.12 (s, 1H), 8.10 (s, 1H), 7.47-7.22 (m, 4H), 6.47-5.88 (m, 2H), 5.62-5.32 (m, 1H), 5.36-4.93 (m, 3H), 3.34-3.08 (m, 1H), 3.05-2.83 (m, 1H).

**<sup>13</sup>C NMR** (75 MHz, CDCl<sub>3</sub>) δ 136.5, 136.2, 136.1, 135.4, 135.1, 129.5, 128.6, 128.0, 127.4, 117.7, 67.1, 38.0.

**HRMS** (ESI) *m/z* calculated for C<sub>15</sub>H<sub>15</sub>ClN<sub>3</sub>O<sub>2</sub> [M+H]<sup>+</sup>: 304.0847, found: 304.0851.

***(E)-4-Nitro-1-(1-(4-(trifluoromethyl)phenyl)hexa-3,5-dien-1-yl)-1H-pyrazole (3ia)***

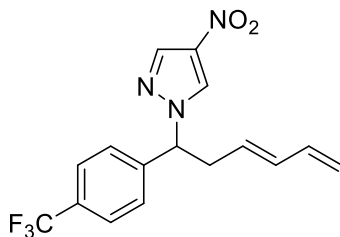

The title compound was prepared from **1i** (24.2 mg, 0.1 mmol, 1 eq.) and **2a** (17.0 mg, 0.15 mmol, 1.5 eq.) via general procedure B. Purified by silica gel column chromatography (eluent: EtOAc/PE = 1:5) furnished **3ia** (15.5 mg, 46% yield) as yellow oil.

**<sup>1</sup>H NMR** (300 MHz, CDCl<sub>3</sub>) δ 8.15 (s, 1H), 8.13 (s, 1H), 7.65 (d, *J* = 8.0 Hz, 2H), 7.46 (d, *J* = 7.8 Hz, 2H), 6.34-5.99 (m, 2H), 5.47 (dt, *J* = 14.3, 7.2 Hz, 1H), 5.41-5.27 (m, 1H), 5.24-4.99 (m, 2H), 3.25 (dt, *J* = 15.7, 8.2 Hz, 1H), 2.97 (dt, *J* = 14.1, 6.7 Hz, 1H).

**<sup>13</sup>C NMR** (75 MHz, CDCl<sub>3</sub>) δ 142.0, 136.2, 136.1, 135.6, 128.2, 127.6, 127.5, 127.1, 126.3 (q, *J* = 3.7 Hz), 123.1 (q, *J* = 245.2 Hz), 120.1, 118.0, 67.3, 38.0.

**<sup>19</sup>F NMR** (282 MHz, CDCl<sub>3</sub>) δ -62.8.

**HRMS** (ESI) *m/z* calculated for C<sub>16</sub>H<sub>15</sub>F<sub>3</sub>N<sub>3</sub>O<sub>2</sub> [M+H]<sup>+</sup>: 338.1111, found: 338.1115.

***(E)-1-(1-(2-Bromophenyl)hexa-3,5-dien-1-yl)-4-nitro-1H-pyrazole (3ja)***

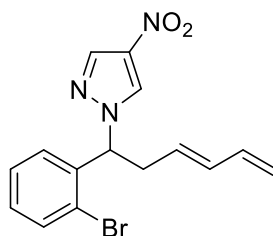

The title compound was prepared from **1j** (25.2 mg, 0.1 mmol, 1 eq.) and **2a** (17.0 mg, 0.5 mmol, 1.5 eq.) via general procedure B. Purified by silica gel column chromatography (eluent: EtOAc/PE = 1:10) furnished **3ja** (17.7 mg, 51% yield) as yellow oil.

**<sup>1</sup>H NMR** (300 MHz, CDCl<sub>3</sub>) δ 8.19 (s, 1H), 8.12 (s, 1H), 7.61 (d, *J* = 8.0 Hz, 1H), 7.54-7.16 (m, 3H), 6.40-5.94 (m, 2H), 5.80 (t, 1H), 5.53 (dt, *J* = 14.4, 7.3 Hz, 1H), 5.29-4.89 (m, 2H), 3.25 (dt, *J* = 16.5, 8.2 Hz, 1H), 3.07-2.82 (m, 1H).

**<sup>13</sup>C NMR** (75 MHz, CDCl<sub>3</sub>) δ 137.2, 136.3, 136.2, 135.3, 133.5, 130.5, 129.1, 128.4, 127.6, 117.6, 66.0, 37.2.

**HRMS** (ESI) *m/z* calculated for C<sub>15</sub>H<sub>15</sub>BrN<sub>3</sub>O<sub>2</sub> [M+H]<sup>+</sup>: 348.0342, found: 348.0340.

***(E)-1-(1-(2-Bromo-4,5-dimethoxyphenyl)hexa-3,5-dien-1-yl)-4-nitro-1H-pyrazole (3ka)***

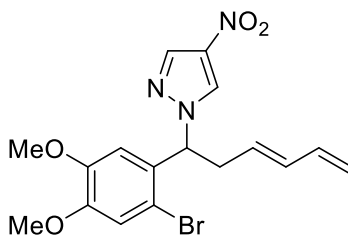

The title compound was prepared from **1k** (31.2 mg, 0.1 mmol, 1 eq.) and **2a** (17.0 mg, 0.15 mmol, 1.5 eq.) via general procedure B. Purified by silica gel column chromatography (eluent: EtOAc/PE = 1:10) furnished **3ka** (26.1 mg, 64% yield) as colorless oil.

**<sup>1</sup>H NMR** (300 MHz, CDCl<sub>3</sub>) δ 8.17 (s, 1H), 8.12 (s, 1H), 7.03 (s, 2H), 6.34-6.01 (m, 2H), 5.79-5.65 (m, 1H), 5.60-5.41 (m, 1H), 5.13 (d, *J* = 16.3 Hz, 1H), 5.04 (d, *J* = 8.6 Hz, 1H), 3.87 (s, 3H), 3.85 (s, 3H), 3.37-3.15 (m, 1H), 3.02-2.81 (m, 1H).

**<sup>13</sup>C NMR** (75 MHz, CDCl<sub>3</sub>) δ 150.0, 149.1, 136.3, 136.1, 135.6, 135.2, 129.02, 128.96, 127.7, 117.5, 115.5, 114.1, 110.7, 65.7, 56.34, 56.30, 37.5.

**HRMS** (ESI) *m/z* calculated for C<sub>17</sub>H<sub>19</sub>BrN<sub>3</sub>O<sub>4</sub> [M+H]<sup>+</sup>: 408.0553, found: 408.0558.

***(E)-1-(1-(Naphthalen-2-yl)hexa-3,5-dien-1-yl)-4-nitro-1H-pyrazole (3la)***

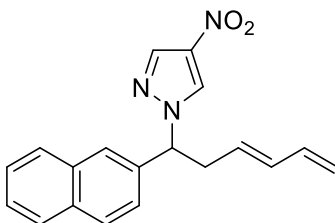

The title compound was prepared from **1l** (22.4 mg, 0.1 mmol, 1 eq.) and **2a** (17.0 mg, 0.15 mmol, 1.5 eq.) via general procedure B. Purified by silica gel column chromatography (eluent: EtOAc/PE = 1:15) furnished **3la** (19.2 mg, 60% yield) as yellow solid.

**<sup>1</sup>H NMR** (300 MHz, CDCl<sub>3</sub>) δ 8.12 (s, 1H), 8.11 (s, 1H), 7.96-7.73 (m, 4H), 7.52 (dd, *J* = 6.3, 3.3 Hz, 2H), 7.43 (d, *J* = 8.4 Hz, 1H), 6.39-5.99 (m, 2H), 5.63-5.40 (m, 2H), 5.13 (d, *J* = 15.3 Hz, 1H), 5.03 (d, *J* = 10.2 Hz, 1H), 3.34 (dt, *J* = 15.5, 8.0 Hz, 1H), 3.08 (dt, *J* = 14.0, 6.7 Hz, 1H).

**<sup>13</sup>C NMR** (75 MHz, CDCl<sub>3</sub>) δ 136.3, 135.9, 135.2, 133.4, 133.3, 129.4, 128.3, 128.1, 127.9, 127.0, 126.9, 126.7, 124.4, 117.5, 67.9, 37.9.

**HRMS** (ESI) *m/z* calculated for C<sub>19</sub>H<sub>18</sub>N<sub>3</sub>O<sub>2</sub> [M+H]<sup>+</sup>: 320.1394, found: 320.1390.

***(E)-1-(1-(6-Bromobenzo[d][1,3]dioxol-5-yl)hexa-3,5-dien-1-yl)-4-nitro-1H-pyrazole (3ma)***

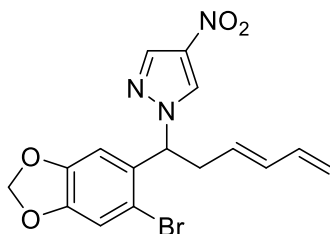

The title compound was prepared from **1m** (29.6 mg, 0.1 mmol, 1 eq.) and **2a** (17.0 mg, 0.15 mmol, 1.5 eq.) via general procedure B. Purified by silica gel column chromatography (eluent: EtOAc/PE = 1:10) furnished **3ma** (25.4 mg, 65% yield) as yellow oil.

**<sup>1</sup>H NMR** (400 MHz, CDCl<sub>3</sub>) δ 8.17 (s, 1H), 8.11 (s, 1H), 7.02 (s, 1H), 6.98 (s, 1H), 6.34-6.06 (m, 2H), 6.01 (d, *J* = 13.5 Hz, 2H), 5.72 (dd, *J* = 9.1, 6.0 Hz, 1H), 5.49 (dt, *J* = 14.5, 7.2 Hz, 1H), 5.14 (d, *J* = 16.6 Hz, 1H), 5.05 (d, *J* = 9.9 Hz, 1H), 3.20 (dt, *J* = 15.8, 8.1 Hz, 1H), 2.87 (dt, *J* = 13.9, 6.6 Hz, 1H).

**<sup>13</sup>C NMR** (75 MHz, CDCl<sub>3</sub>) δ 148.9, 148.2, 136.3, 136.1, 135.6, 135.2, 130.2, 128.9, 127.5, 117.6, 114.6, 113.0, 107.9, 102.4, 65.8, 37.4.

**HRMS** (ESI) m/z calculated for C<sub>16</sub>H<sub>15</sub>BrN<sub>3</sub>O<sub>4</sub> [M+H]<sup>+</sup>: 392.0240, found: 392.0245.

***(E)-1-(1,4-Diphenylbut-3-en-1-yl)-4-nitro-1H-pyrazole (3na)***

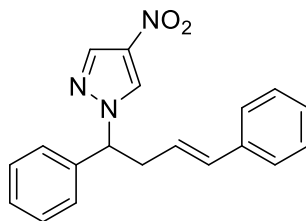

The title compound was prepared from **1n** (22.4 mg, 0.1 mmol, 1 eq.) and **2a** (17.0 mg, 0.15 mmol, 1.5 eq.) via general procedure B. Purified by silica gel column chromatography (eluent: EtOAc/PE = 1:20) furnished **3na** (15.0 mg, 47% yield) as yellow oil.

**<sup>1</sup>H NMR** (300 MHz, CDCl<sub>3</sub>) δ 8.04 (s, 2H), 7.40-7.23 (m, 5H), 7.23-7.11 (m, 5H), 6.40 (d, *J* = 15.8 Hz, 1H), 5.93 (dt, *J* = 16.1, 7.1 Hz, 1H), 5.31 (dd, *J* = 8.6, 6.7 Hz, 1H), 3.30 (dt, *J* = 15.5, 8.0 Hz, 1H), 3.02 (dt, *J* = 14.1, 6.7 Hz, 1H).

**<sup>13</sup>C NMR** (75 MHz, CDCl<sub>3</sub>) δ 138.0, 136.8, 135.9, 134.3, 129.3, 129.2, 128.7, 128.1, 127.9, 127.2, 126.3, 123.9, 68.0, 38.4.

**HRMS** (ESI) m/z calculated for C<sub>19</sub>H<sub>18</sub>N<sub>3</sub>O<sub>2</sub> [M+H]<sup>+</sup>: 320.1394, found: 320.1399.

***Methyl (E)-1-(1-phenylhexa-3,5-dien-1-yl)-1H-pyrazole-3-carboxylate (3ab)***

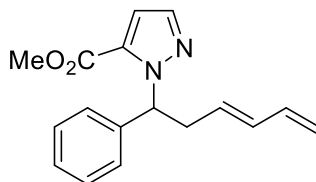

The title compound was prepared from **1a** (17.4 mg, 0.1 mmol, 1 eq.) and **2b** (18.9 mg, 0.15 mmol, 1.5 eq.) via general procedure B. Purified by silica gel column chromatography (eluent: EtOAc/PE = 1:10) furnished **3ab** (14.7 mg, 52% yield) as yellow oil.

**<sup>1</sup>H NMR** (300 MHz, CDCl<sub>3</sub>) δ 7.50 (s, 1H), 7.32 (d, *J* = 7.3 Hz, 2H), 7.29-7.15 (m, 3H), 6.75 (s, 1H), 6.40 (dd, *J* = 9.5, 6.0 Hz, 1H), 6.21-5.90 (m, 2H), 5.45 (dt, *J* = 14.4, 7.1 Hz, 1H), 4.99 (d, *J* = 16.3 Hz, 1H), 4.88 (d, *J* = 9.5 Hz, 1H), 3.76 (s, 3H), 3.26 (dt, *J* = 15.9, 8.2 Hz, 1H), 2.85 (dt, *J* = 13.9, 6.5 Hz, 1H).

**<sup>13</sup>C NMR** (101 MHz, CDCl<sub>3</sub>) δ 160.4, 140.7, 138.4, 137.0, 133.9, 132.4, 130.1, 128.6, 127.9, 127.3, 116.2, 111.8, 63.3, 52.0, 38.9.

**HRMS** (ESI) m/z calculated for C<sub>17</sub>H<sub>19</sub>N<sub>2</sub>O<sub>2</sub> [M+H]<sup>+</sup>: 283.1441, found: 283.1443.

***Ethyl (E)-3-methyl-1-(1-phenylhexa-3,5-dien-1-yl)-1H-pyrazole-5-carboxylate (3ac)***

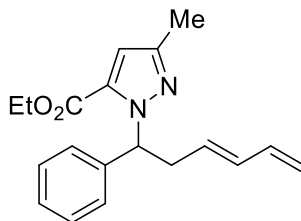

The title compound was prepared from **1a** (17.4 mg, 0.1 mmol, 1 eq.) and **2c** (23.1 mg, 0.15 mmol, 1.5 eq.) via general procedure B. Purified by silica gel column chromatography (eluent: EtOAc/PE = 1:10) furnished **3ac** (20.2 mg, 65% yield) as yellow oil.

**<sup>1</sup>H NMR** (400 MHz, CDCl<sub>3</sub>) δ 7.46-7.19 (m, 5H), 6.60 (s, 1H), 6.38 (dd, *J* = 9.3, 6.2 Hz, 1H), 6.28-5.96 (m, 2H), 5.52 (dt, *J* = 14.6, 7.1 Hz, 1H), 5.06 (d, *J* = 16.7 Hz, 1H), 4.95 (d, *J* = 10.0 Hz, 1H), 4.27 (q, *J* = 7.1 Hz, 2H), 3.29 (dt, *J* = 15.5, 8.2 Hz, 1H), 2.91 (dt, *J* = 14.0, 6.8 Hz, 1H), 2.30 (s, 3H), 1.32 (t, *J* = 7.2 Hz, 3H).

**<sup>13</sup>C NMR** (101 MHz, CDCl<sub>3</sub>) δ 160.1, 147.4, 141.1, 137.1, 133.7, 133.2, 130.6, 128.5, 127.7, 127.3, 115.9, 111.1, 62.9, 60.9, 38.9, 14.3, 13.8.

**HRMS** (ESI) *m/z* calculated for C<sub>19</sub>H<sub>23</sub>N<sub>2</sub>O<sub>2</sub> [M+H]<sup>+</sup>: 311.1754, found: 311.1750.

***Ethyl (E)-5-(tert-butyl)-1-(1-phenylhexa-3,5-dien-1-yl)-1H-pyrazole-3-carboxylate (3ad)***

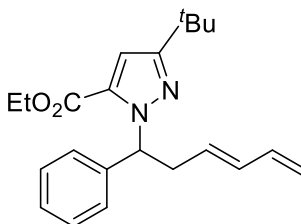

The title compound was prepared from **1a** (17.4 mg, 0.1 mmol, 1 eq.) and **2d** (29.4 mg, 0.15 mmol, 1.5 eq.) via general procedure B. Purified by silica gel column chromatography (eluent: EtOAc/PE = 1:10) furnished **3ad** (21.1 mg, 60% yield) as yellow oil.

**<sup>1</sup>H NMR** (400 MHz, CDCl<sub>3</sub>) δ 7.39 (d, *J* = 7.2 Hz, 2H), 7.32-7.21 (m, 3H), 6.65 (s, 1H), 6.34 (dd, *J* = 9.9, 5.6 Hz, 1H), 6.28-5.97 (m, 2H), 5.52 (dt, *J* = 14.8, 7.2 Hz, 1H), 5.04 (d, *J* = 16.8 Hz, 1H), 4.93 (d, *J* = 9.9 Hz, 1H), 4.36-4.17 (m, 2H), 3.35 (dt, *J* = 14.3, 8.6 Hz, 1H), 2.81 (dt, *J* = 13.6, 6.4 Hz, 1H), 1.33 (s, 12H).

**<sup>13</sup>C NMR** (101 MHz, CDCl<sub>3</sub>) δ 160.3, 141.5, 137.1, 133.9, 132.4, 130.7, 128.4, 127.6, 127.3, 126.3, 115.8, 107.6, 63.3, 60.8, 39.6, 32.3, 30.60, 30.57, 14.4.

**HRMS** (ESI) *m/z* calculated for C<sub>22</sub>H<sub>29</sub>N<sub>2</sub>O<sub>2</sub> [M+H]<sup>+</sup>: 353.2224, found: 353.2227.

***Ethyl (E)-5-phenyl-1-(1-phenylhexa-3,5-dien-1-yl)-1H-pyrazole-3-carboxylate (3ae)***

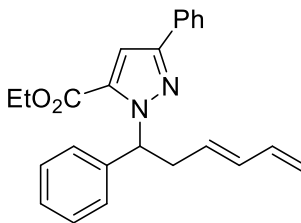

The title compound was prepared from **1a** (17.4 mg, 0.1 mmol, 1 eq.) and **2e** (32.4 mg, 0.15 mmol, 1.5 eq.) via general procedure B. Purified by silica gel column chromatography (eluent: EtOAc/PE = 1:10) furnished **3ae** (23.1 mg, 62% yield) as yellow oil.

yield) as yellow oil.

**<sup>1</sup>H NMR** (400 MHz, CDCl<sub>3</sub>) δ 7.93-7.82 (m, 2H), 7.49-7.37 (m, 4H), 7.36-7.21 (m, 4H), 7.13 (s, 1H), 6.45 (dd, *J* = 9.4, 5.9 Hz, 1H), 6.28-6.04 (m, 2H), 5.58 (dt, *J* = 14.5, 7.1 Hz, 1H), 5.05 (d, *J* = 15.6 Hz, 1H), 4.94 (d, *J* = 9.1 Hz, 1H), 4.38-4.24 (m, 2H), 3.43 (dt, 1H), 2.95 (dt, 1H), 1.35 (t, *J* = 7.1 Hz, 3H).

**<sup>13</sup>C NMR** (101 MHz, CDCl<sub>3</sub>) δ 159.9, 149.9, 140.9, 137.0, 133.9, 133.1, 130.5, 128.8, 128.6, 128.1, 127.8, 127.4, 125.8, 116.1, 108.5, 63.8, 61.1, 39.3, 14.4.

**HRMS** (ESI) *m/z* calculated for C<sub>24</sub>H<sub>25</sub>N<sub>2</sub>O<sub>2</sub> [M+H]<sup>+</sup>: 373.1911, found: 373.1910.

***Diethyl (E)-1-(1-phenylhexa-3,5-dien-1-yl)-1H-pyrazole-3,5-dicarboxylate (3af)***

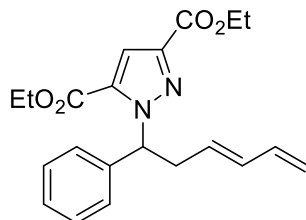

The title compound was prepared from **1a** (17.4 mg, 0.1 mmol, 1 eq.) and **2f** (31.8 mg, 0.15 mmol, 1.5 eq.) via general procedure B. Purified by silica gel column chromatography (eluent: EtOAc/PE = 1:10) furnished **3af** (25.8 mg, 70% yield) as yellow oil.

**<sup>1</sup>H NMR** (400 MHz, CDCl<sub>3</sub>) δ 7.42 (d, *J* = 6.6 Hz, 2H), 7.36-7.21 (m, 4H), 6.50 (dd, *J* = 9.1, 6.3 Hz, 1H), 6.26-6.02 (m, 2H), 5.51 (dt, *J* = 14.5, 7.1 Hz, 1H), 5.07 (d, *J* = 15.8 Hz, 1H), 4.96 (d, *J* = 9.0 Hz, 1H), 4.41 (q, *J* = 7.1 Hz, 2H), 4.37-4.24 (m, 2H), 3.40 (dt, *J* = 15.6, 8.2 Hz, 1H), 2.98 (dt, *J* = 14.1, 6.8 Hz, 1H), 1.40 (t, *J* = 7.1 Hz, 3H), 1.34 (t, *J* = 7.1 Hz, 3H).

**<sup>13</sup>C NMR** (101 MHz, CDCl<sub>3</sub>) δ 161.9, 159.3, 142.5, 139.8, 136.8, 134.2, 133.9, 129.7, 128.6, 128.1, 127.5, 116.3, 114.4, 64.5, 61.4, 61.2, 38.8, 14.5, 14.2.

**HRMS** (ESI) *m/z* calculated for C<sub>21</sub>H<sub>25</sub>N<sub>2</sub>O<sub>4</sub> [M+H]<sup>+</sup>: 369.1809, found: 369.1807.

***(E)-4-Bromo-3-methyl-1-(1-phenylhexa-3,5-dien-1-yl)-1H-pyrazole (3ag)***

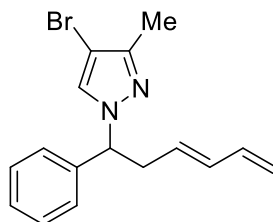

The title compound was prepared from **1a** (17.4 mg, 0.1 mmol, 1 eq.) and **2g** (24.0 mg, 0.15 mmol, 1.5 eq.) via general procedure B. Purified by silica gel column chromatography (eluent: EtOAc/PE = 1:10) furnished **3ag** (23.7 mg, 75% yield) as yellow oil.

**<sup>1</sup>H NMR** (300 MHz, CDCl<sub>3</sub>) δ 7.33-7.12 (m, 6H), 6.25-5.95 (m, 2H), 5.43 (dt, *J* = 14.4, 7.1 Hz, 1H), 5.19-5.08 (m, 1H), 5.03 (d, *J* = 15.6 Hz, 1H), 4.92 (d, *J* = 9.5 Hz, 1H), 3.09 (dt, *J* = 15.2, 7.8 Hz, 1H), 2.82 (dt, *J* = 14.5, 7.0 Hz, 1H), 2.17 (s, 3H).

**<sup>13</sup>C NMR** (101 MHz, CDCl<sub>3</sub>) δ 147.3, 139.7, 136.7, 134.3, 129.3, 129.0, 128.9, 128.3, 127.0, 116.6, 93.8, 66.6, 38.2, 12.2.

**HRMS** (ESI)  $m/z$  calculated for  $C_{16}H_{18}BrN_2$   $[M+H]^+$ : 317.0648, found: 317.0647.

**(E)-3,4,5-Tribromo-1-(1-phenylhexa-3,5-dien-1-yl)-1H-pyrazole (3ah)**

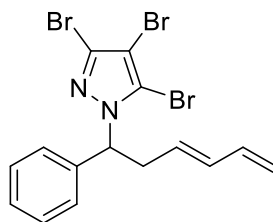

The title compound was prepared from **1a** (17.4 mg, 0.1 mmol, 1 eq.) and **2h** (45.3 mg, 0.15 mmol, 1.5 eq.) via general procedure B. Purified by silica gel column chromatography (eluent: EtOAc/PE = 1:10) furnished **3ah** (36.6 mg, 80% yield) as yellow oil.

**$^1H$  NMR** (400 MHz,  $CDCl_3$ )  $\delta$  7.41-7.26 (m, 5H), 6.33-6.02 (m, 2H), 5.60-5.34 (m, 2H), 5.12 (d,  $J$  = 16.4 Hz, 1H), 5.02 (d,  $J$  = 9.9 Hz, 1H), 3.29 (dt,  $J$  = 15.5, 8.2 Hz, 1H), 2.91 (dt,  $J$  = 13.8, 6.7 Hz, 1H).

**$^{13}C$  NMR** (101 MHz,  $CDCl_3$ )  $\delta$  138.7, 136.6, 134.6, 128.93, 128.90, 128.6, 128.4, 127.1, 116.9, 116.8, 99.9, 65.8, 38.1.

**HRMS** (ESI)  $m/z$  calculated for  $C_{15}H_{14}Br_3N_2$   $[M+H]^+$ : 458.8702, found: 458.8699.

**(E)-1-(1-Phenylhexa-3,5-dien-1-yl)-1H-indazole (3ai)**

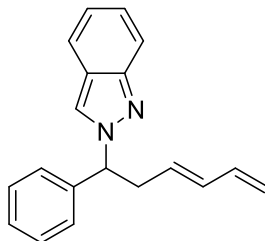

The title compound was prepared from **1a** (17.4 mg, 0.1 mmol, 1 eq.) and **2i** (17.7 mg, 0.15 mmol, 1.5 eq.) via general procedure B. Purified by silica gel column chromatography (eluent: EtOAc/PE = 1:15) furnished **3ai** (19.7 mg, 72% yield) as yellow oil.

**$^1H$  NMR** (400 MHz,  $CDCl_3$ )  $\delta$  7.93 (s, 1H), 7.75 (d,  $J$  = 8.8 Hz, 1H), 7.62 (d,  $J$  = 8.4 Hz, 1H), 7.42-7.21 (m, 6H), 7.13-7.00 (m, 1H), 6.32-6.00 (m, 2H), 5.61 (dd,  $J$  = 8.7, 6.7 Hz, 1H), 5.52 (dt,  $J$  = 14.4, 7.0 Hz, 1H), 5.09 (d,  $J$  = 16.0 Hz, 1H), 4.97 (d,  $J$  = 9.3 Hz, 1H), 3.42 (dt,  $J$  = 15.1, 7.6 Hz, 1H), 3.09 (dt,  $J$  = 14.2, 7.0 Hz, 1H).

**$^{13}C$  NMR** (101 MHz,  $CDCl_3$ )  $\delta$  148.7, 139.6, 136.7, 134.3, 129.3, 128.9, 128.4, 127.1, 126.0, 122.2, 121.8, 121.7, 120.4, 117.9, 116.7, 67.8, 38.6.

**HRMS** (ESI)  $m/z$  calculated for  $C_{19}H_{19}N_2$   $[M+H]^+$ : 275.1543, found: 275.1545.

**(E)-1,3-Diphenyl-2-(1-phenylhexa-3,5-dien-1-yl)propane-1,3-dione (3aj)**

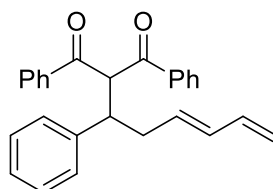

The title compound was prepared from **1a** (17.4 mg, 0.1 mmol, 1 eq.) and **2j** (44.8 mg, 0.2 mmol, 2.0 eq.) via general procedure. Purified by silica gel column chromatography (eluent: EtOAc/PE = 1:20) furnished **3aj** (19.0 mg, 50% yield).

as colorless oil.

**<sup>1</sup>H NMR** (400 MHz, CDCl<sub>3</sub>) δ 8.04 (d, *J* = 7.7 Hz, 2H), 7.73 (d, *J* = 7.7 Hz, 2H), 7.60-7.38 (m, 4H), 7.33-7.05 (m, 7H), 6.11 (dt, *J* = 17.0, 10.2 Hz, 1H), 5.88 (dd, *J* = 15.1, 10.4 Hz, 1H), 5.69 (d, *J* = 10.3 Hz, 1H), 5.40 (dt, *J* = 14.8, 7.2 Hz, 1H), 5.12-4.69 (m, 2H), 4.05 (dt, 1H), 2.52 (t, 2H).

**<sup>13</sup>C NMR** (75 MHz, CDCl<sub>3</sub>) δ 194.9, 194.5, 140.9, 137.2, 137.0, 136.9, 133.7, 133.3, 133.2, 131.5, 129.0, 128.8, 128.6, 128.5, 128.4, 126.8, 115.7, 63.9, 47.1, 37.3.

**HRMS** (ESI) *m/z* calculated for C<sub>27</sub>H<sub>25</sub>O<sub>2</sub> [M+H]<sup>+</sup>: 381.1849, found: 381.1850.

#### General procedure C for synthesis of 5a-5k

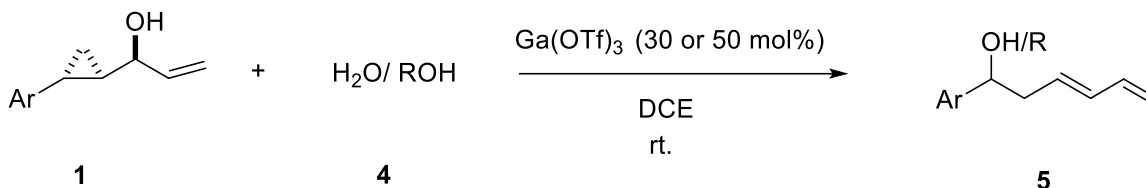

**General procedure C:** A 10 mL dry tube equipped with a stir bar was charged with compound **1** (0.1 mmol, 1.0 eq.), **water** (0.5 mmol) or alcohols **4** (0.2 mmol, 2.0 eq.), Ga(OTf)<sub>3</sub> (30 mol% for the synthesis of **5a-5b**, **5e** and **5h-5k**; 50 mol% for the synthesis of **5c-5d**, **5f-5g**) and dry DCE (2.0 mL). The reaction mixture was stirred at room temperature for 12 hours. After completion of the reaction, the reaction mixture was concentrated under reduced pressure, then 2.0 ml of water was added, and the reaction solution was extracted with ethyl acetate (3 x 5 mL), the combined organic layers were dried over anhydrous magnesium sulfate, filtered and evaporated under reduced pressure. The remaining residue was purified by column chromatography on silica gel to afford the corresponding products (**5a-5k**).

#### (*E*)-1-Phenylhexa-3,5-dien-1-ol (**5a**)

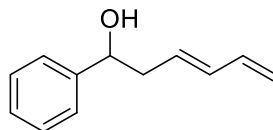

The title compound was prepared from **1a** (17.4 mg, 0.1 mmol, 1 eq.) and **4a** (3.6 mg, 0.2mmol, 2.0 eq.) via general procedure. Purified by silica gel column chromatography (eluent: EtOAc/PE = 1:10) furnished **5a** (11.3 mg, 65% yield) as colorless oil.

**<sup>1</sup>H NMR** (300 MHz, CDCl<sub>3</sub>) δ 7.44-7.26 (m, 5H), 6.49-6.04 (m, 2H), 5.69 (dt, *J* = 14.8, 7.3 Hz, 1H), 5.15 (d, *J* = 16.6 Hz, 1H), 5.03 (d, *J* = 9.9 Hz, 1H), 4.74 (t, *J* = 6.5 Hz, 1H), 2.55 (t, *J* = 7.2 Hz, 2H), 2.00 (s, 1H).

**<sup>13</sup>C NMR** (101 MHz, CDCl<sub>3</sub>) δ 144.0, 136.8, 134.6, 130.2, 128.6, 127.8, 125.9, 116.5, 73.8, 42.8.

**HRMS** (ESI) *m/z* calculated for C<sub>12</sub>H<sub>15</sub>O [M+H]<sup>+</sup>: 175.1117, found: 175.1120.

#### (*E*)-1-(*p*-Tolyl)hexa-3,5-dien-1-ol (**5b**)

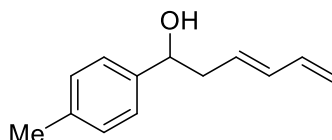

The title compound was prepared from **1b** (18.8 mg, 0.1 mmol, 1 eq.) and **4a** (3.6 mg, 0.2mmol, 2.0 eq.) via general procedure. Purified by silica gel column chromatography (eluent: EtOAc/PE = 1:10) furnished **5b** (12.4 mg, 66% yield)



as colorless oil.

**<sup>1</sup>H NMR** (300 MHz, CDCl<sub>3</sub>) δ 7.35-7.14 (m, 4H), 6.53-6.03 (m, 2H), 5.68 (dt, *J* = 14.8, 7.0 Hz, 1H), 5.15 (d, *J* = 16.2 Hz, 1H), 5.03 (d, *J* = 10.2 Hz, 1H), 4.85-4.61 (m, 1H), 2.53 (t, *J* = 6.7 Hz, 2H), 2.35 (s, 3H), 1.96 (s, 1H).

**<sup>13</sup>C NMR** (75 MHz, CDCl<sub>3</sub>) δ 141.0, 137.4, 136.9, 134.4, 130.4, 129.3, 125.9, 116.3, 73.6, 42.7, 21.3.

The NMR data was similar with the reported literature.<sup>3</sup>

***(E)*-1-(2-Methoxyphenyl)hexa-3,5-dien-1-ol (5c)**

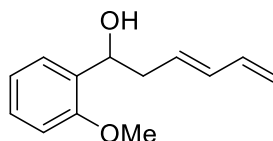

The title compound was prepared from **1d** (19.2 mg, 0.1 mmol, 1 eq.) and **4a** (3.6 mg, 0.2mmol, 2.0 eq.) via general procedure. Purified by silica gel column chromatography (eluent: EtOAc/PE = 1:10) furnished **5c** (11.5 mg, 60% yield) as colorless oil.

**<sup>1</sup>H NMR** (400 MHz, CDCl<sub>3</sub>) δ 7.33 (dd, *J* = 7.5, 1.8 Hz, 1H), 7.28-7.21 (m, 1H), 6.96 (t, *J* = 7.5 Hz, 1H), 6.88 (d, *J* = 8.2 Hz, 1H), 6.32 (dt, *J* = 16.9, 10.3 Hz, 1H), 6.15 (dd, *J* = 15.1, 10.4 Hz, 1H), 5.74 (dt, *J* = 14.9, 7.3 Hz, 1H), 5.12 (d, *J* = 16.8 Hz, 1H), 5.04-4.91 (m, 2H), 3.85 (s, 3H), 2.67-2.48 (m, 3H).

**<sup>13</sup>C NMR** (101 MHz, CDCl<sub>3</sub>) δ 156.5, 137.1, 133.8, 131.8, 131.2, 128.5, 126.9, 120.8, 115.8, 110.5, 70.2, 55.4, 40.7.

The NMR data was similar with the reported literature.<sup>3</sup>

***(E)*-1-(2,4-Dimethylphenyl)hexa-3,5-dien-1-ol (5d)**

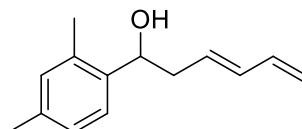

The title compound was prepared from **1e** (20.2 mg, 0.1 mmol, 1 eq.) and **4a** (3.6 mg, 0.2mmol, 2.0 eq.) via general procedure. Purified by silica gel column chromatography (eluent: EtOAc/PE = 1:10) furnished **5d** (12.3 mg, 61% yield) as colorless oil.

**<sup>1</sup>H NMR** (300 MHz, CDCl<sub>3</sub>) δ 7.36 (d, *J* = 7.8 Hz, 1H), 7.05 (d, *J* = 7.8 Hz, 1H), 6.96 (s, 1H), 6.48-6.06 (m, 2H), 5.73 (dt, *J* = 14.8, 7.3 Hz, 1H), 5.15 (d, *J* = 15.9 Hz, 1H), 5.02 (d, *J* = 9.9 Hz, 1H), 4.94 (dd, *J* = 7.7, 5.1 Hz, 1H), 2.57-2.40 (m, 2H), 2.32 (s, 3H), 2.30 (s, 3H), 1.88 (s, 1H).

**<sup>13</sup>C NMR** (75 MHz, CDCl<sub>3</sub>) δ 139.1, 137.0, 136.9, 134.4, 134.3, 131.3, 130.7, 127.1, 125.3, 116.3, 70.1, 41.6, 21.1, 19.1.

**HRMS** (ESI) *m/z* calculated for C<sub>14</sub>H<sub>19</sub>O [M+H]<sup>+</sup>: 203.1430, found: 203.1433.

***(E)*-1-(4-Chlorophenyl)hexa-3,5-dien-1-ol (5e)**

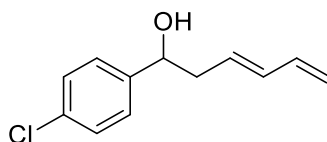

The title compound was prepared from **1h** (20.8 mg, 0.1 mmol, 1 eq.) and **4a** (3.6 mg, 0.2mmol, 2.0 eq.) via general procedure. Purified by silica gel column chromatography (eluent: EtOAc/PE = 1:10) furnished **5e** (11.0 mg, 53% yield) as colorless oil.

**<sup>1</sup>H NMR** (300 MHz, CDCl<sub>3</sub>) δ 7.37-7.24 (m, 4H), 6.41-6.23 (m, 1H), 6.22-6.07 (m, 1H), 5.64 (dt, *J* = 14.8, 7.4 Hz, 1H), 5.15 (d, *J* = 16.1 Hz, 1H), 5.04 (d, *J* = 9.9 Hz, 1H), 4.71 (t, *J* = 6.5 Hz, 1H), 2.59-2.41 (m, 2H), 2.08 (s, 1H).

**<sup>13</sup>C NMR** (75 MHz, CDCl<sub>3</sub>) δ 142.4, 136.7, 134.9, 133.3, 129.6, 128.7, 127.3, 116.7, 73.0, 42.8.

The NMR data was similar with the reported literature.<sup>3</sup>

***(E)*-1-(2-Bromophenyl)hexa-3,5-dien-1-ol (5f)**

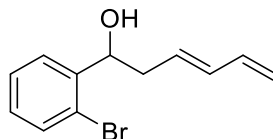

The title compound was prepared from **1j** (25.2 mg, 0.1 mmol, 1 eq.) and **4a** (3.6 mg, 0.2mmol, 2.0 eq.) via general procedure. Purified by silica gel column chromatography (eluent: EtOAc/PE = 1:10) furnished **5f** (12.6 mg, 50% yield) as yellow oil.

**<sup>1</sup>H NMR** (300 MHz, CDCl<sub>3</sub>) δ 7.62-7.46 (m, 2H), 7.35 (t, *J* = 7.6 Hz, 1H), 7.14 (t, *J* = 7.4 Hz, 1H), 6.64-5.97 (m, 2H), 5.77 (dt, *J* = 14.8, 7.3 Hz, 1H), 5.35-4.90 (m, 3H), 2.76-2.58 (m, 1H), 2.38 (dt, *J* = 15.2, 8.2 Hz, 1H), 2.13 (s, 1H).

**<sup>13</sup>C NMR** (101 MHz, CDCl<sub>3</sub>) δ 142.8, 136.8, 134.8, 132.8, 130.0, 129.0, 127.8, 127.4, 121.9, 116.6, 72.3, 41.0.

**HRMS** (ESI) *m/z* calculated for C<sub>12</sub>H<sub>14</sub>BrO [M+H]<sup>+</sup>: 253.0223, found: 253.0220.

***(E)*-1-(6-Bromobenzo[d][1,3]dioxol-5-yl)hexa-3,5-dien-1-ol (5g)**

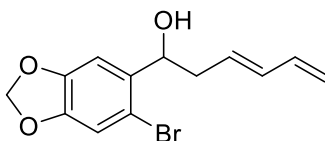

The title compound was prepared from **1m** (29.6 mg, 0.1 mmol, 1 eq.) and **4a** (3.6 mg, 0.2mmol, 2.0 eq.) via general procedure. Purified by silica gel column chromatography (eluent: EtOAc/PE = 1:10) furnished **5g** (16.0 mg, 54% yield) as yellow oil.

**<sup>1</sup>H NMR** (300 MHz, CDCl<sub>3</sub>) δ 7.05 (s, 1H), 6.96 (s, 1H), 6.50-6.07 (m, 2H), 5.97 (s, 2H), 5.74 (dt, *J* = 14.9, 7.3 Hz, 1H), 5.19 (d, 1H), 5.14-4.94 (m, 2H), 2.67-2.49 (m, 1H), 2.34 (dt, *J* = 15.1, 8.2 Hz, 1H), 2.10 (s, 1H).

**<sup>13</sup>C NMR** (75 MHz, CDCl<sub>3</sub>) δ 147.8, 136.8, 136.3, 134.7, 130.0, 116.6, 112.6, 112.1, 107.3, 101.9, 72.2, 41.2.

**HRMS** (ESI) *m/z* calculated for C<sub>13</sub>H<sub>14</sub>BrO<sub>3</sub> [M+H]<sup>+</sup>: 297.0121, found: 297.0125.

***(E)*-(1-Ethoxyhexa-3,5-dien-1-yl)benzene (5h)**

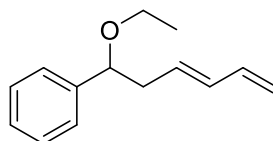

The title compound was prepared from **1a** (17.4 mg, 0.1 mmol, 1 eq.) and **4b** (9.2 mg, 0.2mmol, 2.0 eq.) via general procedure. Purified by silica gel column chromatography (eluent: EtOAc/PE = 1:20) furnished **5h** (17.0 mg, 84% yield) as colorless oil.

**<sup>1</sup>H NMR** (400 MHz, CDCl<sub>3</sub>) δ 7.43-7.21 (m, 5H), 6.29 (dt, *J* = 17.0, 10.3 Hz, 1H), 6.18-5.96 (m, 1H), 5.66 (dt, *J* = 14.8, 7.2 Hz, 1H), 5.08 (d, *J* = 17.0 Hz, 1H), 4.97 (d, *J* = 10.1 Hz, 1H), 4.25 (dd, *J* = 7.6, 5.8 Hz, 1H), 3.46-3.21 (m, 2H), 2.60 (dt, *J* = 14.5, 7.3 Hz, 1H), 2.41 (dt, *J* = 13.6, 6.6 Hz, 1H), 1.17 (t, *J* = 7.0 Hz, 3H).

$^{13}\text{C}$  NMR (101 MHz,  $\text{CDCl}_3$ )  $\delta$  142.5, 137.2, 133.1, 131.2, 128.5, 127.6, 126.7, 115.6, 82.0, 64.3, 41.6, 15.4.

HRMS (ESI)  $m/z$  calculated for  $\text{C}_{14}\text{H}_{19}\text{O}$   $[\text{M}+\text{H}]^+$ : 203.1430, found: 203.1433.

***(E)-(1-Isopropoxyhexa-3,5-dien-1-yl)benzene (5i)***

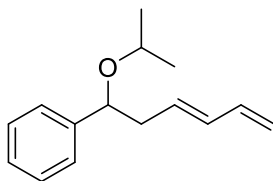

The title compound was prepared from **1a** (17.4 mg, 0.1 mmol, 1 eq.) and **4c** (12.0 mg, 0.2mmol, 2.0 eq.) via general procedure. Purified by silica gel column chromatography (eluent: EtOAc/PE = 1:20) furnished **5i** (15.8 mg, 73% yield) as colorless oil.

$^1\text{H}$  NMR (300 MHz,  $\text{CDCl}_3$ )  $\delta$  7.37-7.24 (m, 5H), 6.40-6.17 (m, 1H), 6.06 (dd,  $J$  = 15.2, 10.4 Hz, 1H), 5.66 (dt,  $J$  = 14.8, 7.2 Hz, 1H), 5.08 (d,  $J$  = 17.1 Hz, 1H), 4.96 (d,  $J$  = 10.1 Hz, 1H), 4.35 (dd,  $J$  = 7.8, 5.7 Hz, 1H), 3.58-3.37 (m, 1H), 2.54 (dt,  $J$  = 14.6, 7.4 Hz, 1H), 2.38 (dt,  $J$  = 13.8, 6.5 Hz, 1H), 1.14 (d,  $J$  = 6.0 Hz, 3H), 1.08 (d,  $J$  = 6.2 Hz, 3H).

$^{13}\text{C}$  NMR (75 MHz,  $\text{CDCl}_3$ )  $\delta$  143.3, 137.3, 133.0, 131.4, 128.4, 127.5, 126.7, 115.5, 79.3, 69.1, 42.0, 23.5, 21.4.

HRMS (ESI)  $m/z$  calculated for  $\text{C}_{15}\text{H}_{21}\text{O}$   $[\text{M}+\text{H}]^+$ : 217.1587, found: 217.1591.

***(E)-(1-(tert-Butoxy)hexa-3,5-dien-1-yl)benzene (5j)***

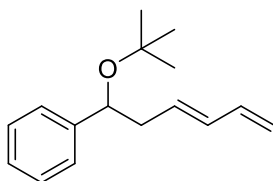

The title compound was prepared from **1a** (17.4 mg, 0.1 mmol, 1 eq.) and **4d** (14.8 mg, 0.2mmol, 2.0 eq.) via general procedure. Purified by silica gel column chromatography (eluent: EtOAc/PE = 1:20) furnished **5j** (13.8 mg, 60% yield) as colorless oil.

$^1\text{H}$  NMR (300 MHz,  $\text{CDCl}_3$ )  $\delta$  7.38-7.26 (m, 5H), 6.30 (dt,  $J$  = 16.9, 10.2 Hz, 1H), 6.05 (dd,  $J$  = 15.2, 10.4 Hz, 1H), 5.67 (dt,  $J$  = 14.9, 7.3 Hz, 1H), 5.09 (d,  $J$  = 17.0 Hz, 1H), 4.97 (d,  $J$  = 10.1 Hz, 1H), 4.46 (dd,  $J$  = 8.1, 5.3 Hz, 1H), 2.54-2.24 (m, 2H), 1.11 (s, 9H).

$^{13}\text{C}$  NMR (75 MHz,  $\text{CDCl}_3$ )  $\delta$  146.2, 137.4, 133.0, 132.1, 128.2, 126.8, 126.2, 115.4, 74.6, 74.5, 43.7, 28.8.

HRMS (ESI)  $m/z$  calculated for  $\text{C}_{16}\text{H}_{23}\text{O}$   $[\text{M}+\text{H}]^+$ : 231.1743, found: 231.1745.

***(E)-(1-Phenoxyhexa-3,5-dien-1-yl)benzene (5k)***

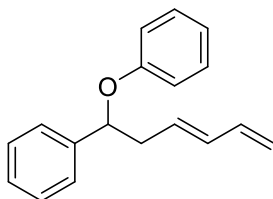

The title compound was prepared from **1a** (17.4 mg, 0.1 mmol, 1 eq.) and **4e** (18.8 mg, 0.2mmol, 2.0 eq.) via general procedure. Purified by silica gel column chromatography (eluent: EtOAc/PE = 1:20) furnished **5k** (16.5 mg, 66% yield) as colorless oil.

**<sup>1</sup>H NMR** (400 MHz, CDCl<sub>3</sub>) δ 7.33 (d, *J* = 6.8 Hz, 4H), 7.25 (d, *J* = 6.8 Hz, 1H), 7.17 (t, *J* = 7.9 Hz, 2H), 6.96-6.75 (m, 3H), 6.29 (dt, *J* = 16.9, 10.2 Hz, 1H), 6.12 (dd, *J* = 15.2, 10.4 Hz, 1H), 5.74 (dt, *J* = 14.8, 7.2 Hz, 1H), 5.18-5.06 (m, 2H), 4.99 (d, *J* = 10.0 Hz, 1H), 2.78 (dt, *J* = 14.7, 7.4 Hz, 1H), 2.60 (dt, *J* = 13.8, 6.3 Hz, 1H).

**<sup>13</sup>C NMR** (101 MHz, CDCl<sub>3</sub>) δ 158.2, 141.5, 137.1, 133.8, 130.2, 129.5, 129.4, 128.7, 127.7, 126.1, 120.9, 116.1, 80.0, 41.9.

**HRMS** (ESI) *m/z* calculated for C<sub>18</sub>H<sub>19</sub>O [M+H]<sup>+</sup>: 251.1430, found: 251.1437.

### The preparation of the compound 6

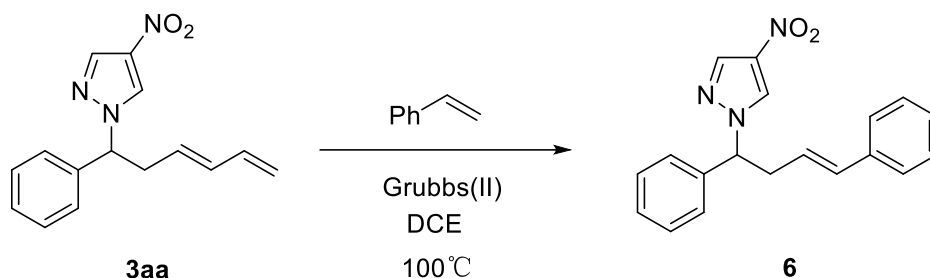

The compound **3aa** (26.9 mg, 0.1 mmol) was dissolved in the solvent of DCE (2.0 mL), then styrene (8.0 equiv.) and the Grubbs II catalyst (15 mol %) was added. The reaction was heated to 100 °C stirred for 12 h, until the substrate was fully consumed (monitored by TLC). After complete consumption of the starting material, the mixture solution was quenched by H<sub>2</sub>O (2 mL) and extracted with EtOAc (3 \* 2 mL). The combined organic layer was washed with brine solution and dried over anhydrous Na<sub>2</sub>SO<sub>4</sub>, concentrated under reduced pressure and purified by silica gel column chromatography (EtOAc/PE = 1:10) to give (E)-1-(1,4-diphenylbut-3-en-1-yl)-4-nitro-1H-pyrazole **6** (23.0 mg, 72% yield) as colorless oil.

**<sup>1</sup>H NMR** (300 MHz, CDCl<sub>3</sub>) δ 8.12 (s, 2H), 7.58-7.09 (m, 10H), 6.48 (d, *J* = 15.8 Hz, 1H), 6.00 (dt, *J* = 15.3, 7.2 Hz, 1H), 5.38 (t, *J* = 7.7 Hz, 1H), 3.37 (dt, *J* = 15.6, 8.1 Hz, 1H), 3.10 (dt, *J* = 14.1, 6.7 Hz, 1H).

**<sup>13</sup>C NMR** (101 MHz, CDCl<sub>3</sub>) δ 137.9, 136.7, 135.9, 134.2, 129.3, 129.2, 128.73, 128.70, 128.1, 127.8, 127.2, 126.3, 123.9, 67.9, 38.4.

**HRMS** (ESI) *m/z* calculated for C<sub>19</sub>H<sub>18</sub>N<sub>3</sub>O<sub>2</sub> [M+H]<sup>+</sup>: 320.1394, found: 320.1399.

### The preparation of the compound 7

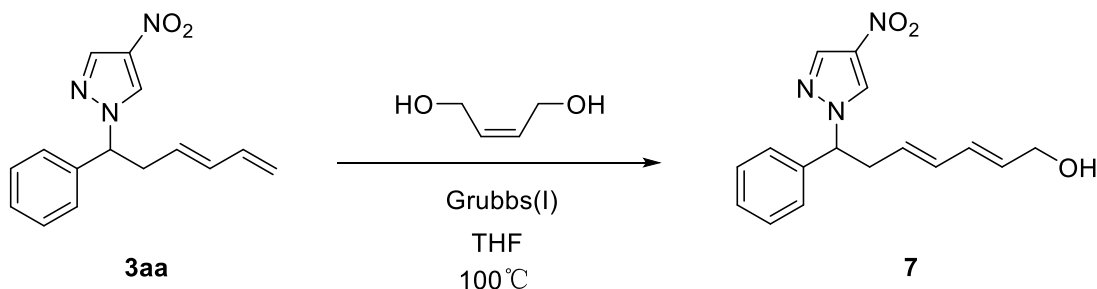

The compound **3aa** (26.9 mg, 0.1 mmol) was dissolved in the solvent of THF (2.0 mL), then 2-Butene-1,4-diol (8.0 equiv.) and the Grubbs I catalyst (15 mol %) was added. The reaction was heated to 100 °C stirred for 12 h, until the substrate was fully consumed (monitored by TLC). After complete consumption of the starting material, the mixture solution was quenched by H<sub>2</sub>O (2 mL) and extracted with EtOAc (3 \* 2 mL). The combined organic layer was washed with brine solution and dried over anhydrous Na<sub>2</sub>SO<sub>4</sub>, concentrated under reduced pressure and purified by silica gel column

chromatography (EtOAc/PE = 1:5) to give (2E,4E)-7-(4-nitro-1H-pyrazol-1-yl)-7-phenylhepta-2,4-dien-1-ol **7** (17.3 mg, 58% yield) as yellow oil.

**<sup>1</sup>H NMR** (400 MHz, CDCl<sub>3</sub>) δ 8.10 (s, 1H), 8.09 (s, 1H), 7.46-7.26 (m, 5H), 6.31-5.96 (m, 2H), 5.88-5.65 (m, 1H), 5.60-5.42 (m, 1H), 5.30 (t, *J* = 7.7 Hz, 1H), 4.15 (d, *J* = 5.6 Hz, 2H), 3.24 (dt, *J* = 15.6, 8.1 Hz, 1H), 2.97 (dt, *J* = 14.2, 6.8 Hz, 1H), 1.40 (s, 1H).

**<sup>13</sup>C NMR** (101 MHz, CDCl<sub>3</sub>) δ 137.8, 135.9, 133.7, 132.2, 130.5, 129.3, 129.2, 128.0, 127.8, 127.2, 67.8, 63.3, 38.0.

**HRMS** (ESI) *m/z* calculated for C<sub>16</sub>H<sub>18</sub>N<sub>3</sub>O<sub>3</sub> [M+H]<sup>+</sup>: 300.1343, found: 300.1340.

### The preparation of the compound **8**

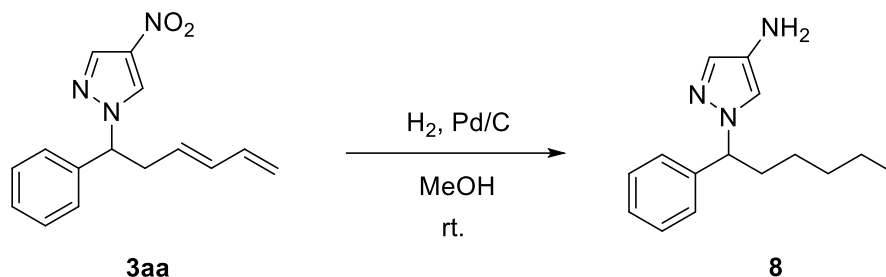

The compound **3aa** (26.9 mg, 0.1 mmol) was dissolved in the solvent of methanol (4.0 mL), Pd/C (15%wt, 5.5 mg) was added to the mixture solution, and the solution was then purged with hydrogen balloon and went 24 h under hydrogen balloon. Then, the reaction was filtered over a short path of Celite, concentrated in vacuo, and the crude mixture was purified by flash column chromatography (EtOAc/PE = 1/3) to give 1-(1-phenylhexyl)-1H-pyrazol-4-amine **8** (14.8 mg, 61% yield) as dark red oil.

**<sup>1</sup>H NMR** (400 MHz, CDCl<sub>3</sub>) δ 7.65-7.09 (m, 6H), 7.03 (s, 1H), 5.12 (t, *J* = 7.7 Hz, 1H), 2.63 (s, 2H), 2.43-2.25 (m, 1H), 2.16-2.01 (m, 1H), 1.28 (d, *J* = 12.0 Hz, 6H), 0.85 (t, *J* = 6.7 Hz, 3H).

**<sup>13</sup>C NMR** (101 MHz, CDCl<sub>3</sub>) δ 141.4, 131.1, 128.8, 128.7, 127.8, 126.7, 117.6, 66.4, 35.2, 31.6, 26.3, 22.6, 14.1.

**HRMS** (ESI) *m/z* calculated for C<sub>15</sub>H<sub>22</sub>N<sub>3</sub> [M+H]<sup>+</sup>: 244.1808, found: 244.1814.

### Synthesis method of enantioenriched vinyl cyclopropyl alcohol **1a**

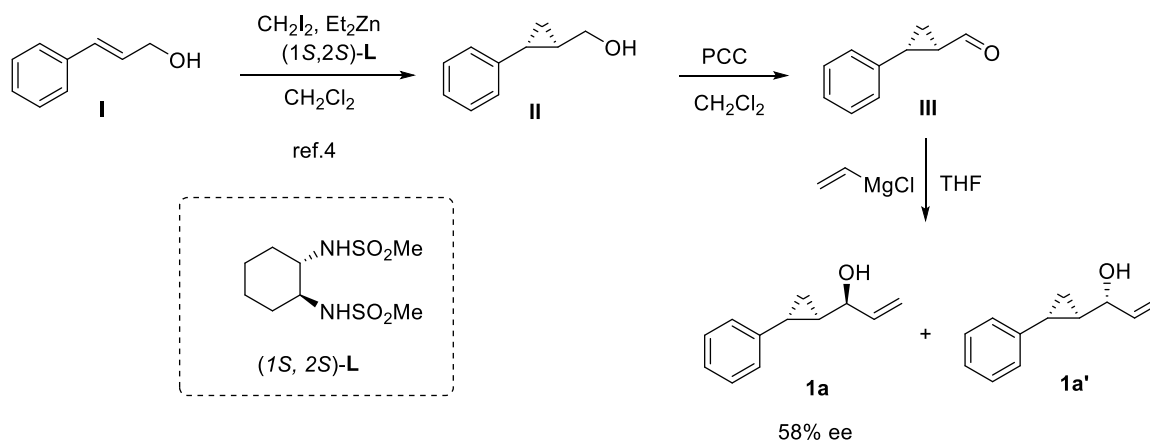

According to the procedure of reported literature,<sup>4</sup> to a dried 250 mL flask were added CH<sub>2</sub>I<sub>2</sub> (20.0 mmol, 2.0 eq.) and CH<sub>2</sub>Cl<sub>2</sub> (100 mL). After cooling to 0 °C, Et<sub>2</sub>Zn (1 M in hexane, 12.5 mmol, 1.25 eq.) was added. The resulting mixture was stirred at this temperature for 30 min. To another flask were added 3-Phenyl-2-propen-1-ol (**I**) (1.34 g, 10.0 mmol, 1.0 eq.), (1*S*,2*S*)-**L** (270.4 mg, 1.0 mmol, 0.1 eq.) and CH<sub>2</sub>Cl<sub>2</sub> (30 mL). After cooling to 0 °C, Et<sub>2</sub>Zn (1 M in hexane, 12.5

mmol, 1.25 eq.) was added. The resulting mixture was stirred at this temperature for 30 min. This reaction mixture was then added to the reaction mixture in the 250 mL flask. After stirred at 0 °C for 30 min, the resulting mixture was allowed to warm to room temperature and then stirred for 18 h. Then, the reaction mixture was quenched with sat. aq. NH<sub>4</sub>Cl and 1 M aq. HCl. The organic layer was separated. The aqueous layer was then extracted with CH<sub>2</sub>Cl<sub>2</sub> (2\*100 mL). The combined organic layer was dried over MgSO<sub>4</sub> and concentrated in vacuo. The residue was direct used without further purification. To a solution of compound (10.0 mmol) in CH<sub>2</sub>Cl<sub>2</sub> (25 mL) was added PCC (15.0 mmol, 1.5 eq.) at room temperature under Ar atmosphere. After 1 h, the reaction mixture was filtered through a pad of Celite and the filtrate was concentrated in vacuo. The residue was purified by column chromatography on silica gel to afford **III** as colorless oil.

To a flame dried flask was cooled to 0 °C and charged with **III** (1.24g, 8.5 mmol, 1.0 eq.) and dry THF, the flask was backfilled with argon gas. Then, vinylmagnesium chloride (1.0 M in THF solution, 17.0 mmol, 2.0 eq.) was slowly added to the above solution. Then, the mixture was stirred at 0 °C for 1 h (monitored by TLC) and quenched with saturated aq. NH<sub>4</sub>Cl (30 mL). The aqueous layer was extracted with EtOAc and the organic phase was dried with Na<sub>2</sub>SO<sub>4</sub>, filtered and concentrated in vacuo. The crude residue was purified by column chromatography on silica gel to give the enantioenriched diastereoisomer **1a/1a'** = 1:1. Compound **1a** (591.6 mg, 40% yield) and **1a'** (591.6 mg, 40% yield) as colorless oil.

HPLC spectra of chiral **1a** (Daicel Chiralpak IB column (hexane/iPrOH = 95:5), flow rate: 1.0 mL/min, λ = 215 nm, t<sub>R</sub>(major) = 7.70 min, t<sub>R</sub>(minor) = 8.28 min. ee = 58%)

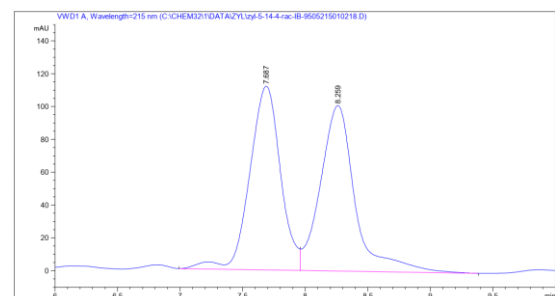

| Peak Name | RT [min] | Type | width [min] | Area [mAU*s] | Height [mAU] | Area ratio % |
|-----------|----------|------|-------------|--------------|--------------|--------------|
| 1         | 7.687    | VV R | 0.2597      | 1923.05945   | 111.99230    | 49.8778      |
| 2         | 8.259    | VB   | 0.2886      | 1932.48340   | 100.83273    | 50.1222      |

**Rac-1a**

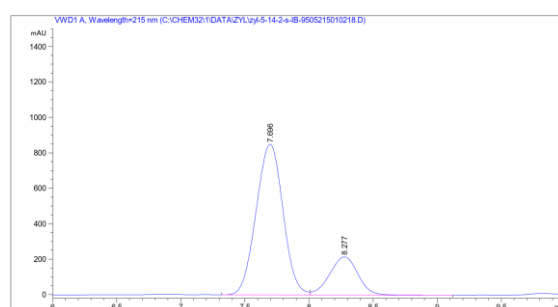

| Peak Name | RT [min] | Type | width [min] | Area [mAU*s] | Height [mAU] | Area ratio % |
|-----------|----------|------|-------------|--------------|--------------|--------------|
| 1         | 7.696    | BV   | 0.2298      | 1.23717e4    | 850.12811    | 78.9960      |
| 2         | 8.277    | VB   | 0.2383      | 3289.46387   | 215.21815    | 21.0040      |

**Chiral-1a**

### Stereospecific reaction with enantioenriched vinyl cyclopropyl alcohol **1a** with **2a**

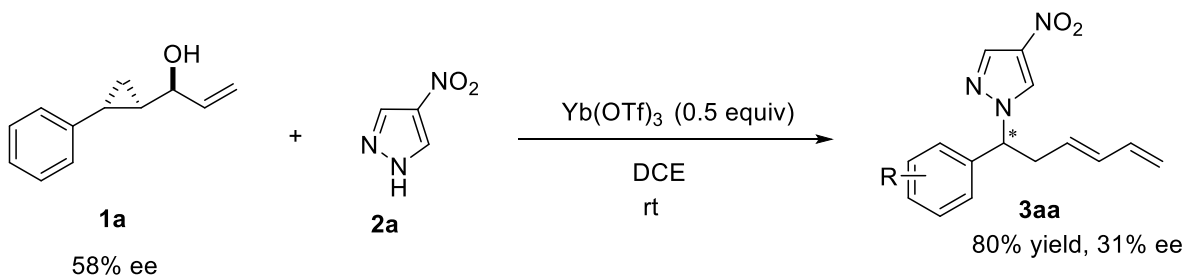

The compound chiral **1a** (17.5 mg, 0.1 mmol, 58% ee) was dissolved in dry DCE (2 mL), and then the 3-nitropyrrole **2a** (17.0 mg, 0.15 mmol, 1.5 eq.) and Yb(OTf)<sub>3</sub> (50 mol%, 0.5 eq.) were added to the solution. The reaction mixture was stirred at room temperature for 12 hours. After completion of the reaction, the reaction mixture was concentrated under reduced pressure, then 2.0 ml of water was added, and the reaction solution was extracted with ethyl acetate (3 \* 5 mL), the combined organic layers were dried over anhydrous Na<sub>2</sub>SO<sub>4</sub>, filtered and evaporated under reduced pressure. The

remaining residue was purified by column chromatography on silica gel to afford the corresponding products chiral **3aa** in 80% yield. <sup>1</sup>H NMR was similar with the compound **3aa**.

HPLC spectra of **3aa** (Daicel Chiralpak IB column (hexane/iPrOH) = 95:5, flow rate: 1.0 mL/min,  $\lambda$  = 215 nm,  $t_R$ (major) = 14.32 min,  $t_R$  (minor) = 18.38 min. ee = 31%)

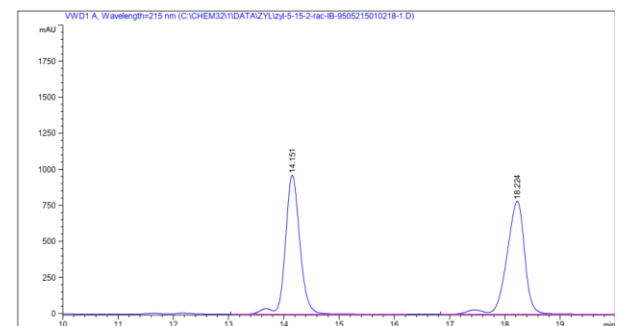

| Peak Name | RT [min] | Type | width [min] | Area [mAU*s] | Height [mAu] | Area ratio % |
|-----------|----------|------|-------------|--------------|--------------|--------------|
| 1         | 14.151   | VB R | 0.2723      | 1.75550e4    | 962.76953    | 49.9793      |
| 2         | 18.224   | VB R | 0.3372      | 1.75695e4    | 780.72186    | 50.0207      |

**Rac-3aa**

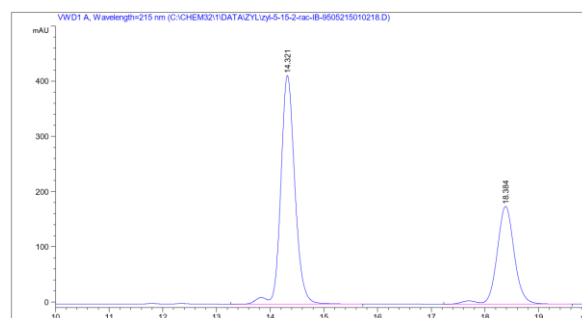

| Peak Name | RT [min] | Type | width [min] | Area [mAU*s] | Height [mAu] | Area ratio % |
|-----------|----------|------|-------------|--------------|--------------|--------------|
| 1         | 14.321   | VB R | 0.2756      | 7577.15625   | 414.42847    | 65.6356      |
| 2         | 18.384   | VB R | 0.3349      | 3967.11499   | 177.14307    | 34.3644      |

**Chiral-3aa**

## References

1. a) Qu, Z.; Shi, W.; Wang, J. *Chin. Chem. Lett.* **2002**, 13, 1033-1036. b) Toy, P. H.; Newcomb, M.; Hollenberg, P. F. *J. Am. Chem. Soc.* **1998**, 120, 7719-7729. c) Kim, H. Y.; Salvi, L.; Carroll, P. J.; Walsh, P. J. *J. Am. Chem. Soc.* **2010**, 132, 402-412.
2. a) H. Y. Kim, L. Salvi, P. J. Carroll, P. J. Walsh, *J. Am. Chem. Soc.* **2010**, 132, 402-412. b) R. Infante, J. Nieto, C. Andrés, *Org. Biomol. Chem.*, **2014**, 12, 345-354.
3. J. Liu, B. Su, M. Chen. *Org. Lett.* **2021**, 23, 6035-6040.
4. S. E. Denmark and S. P. O'Connor, *J. Org. Chem.* **1997**, 62, 3390-3401

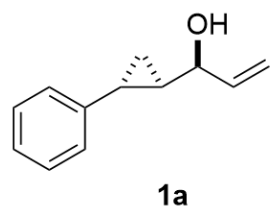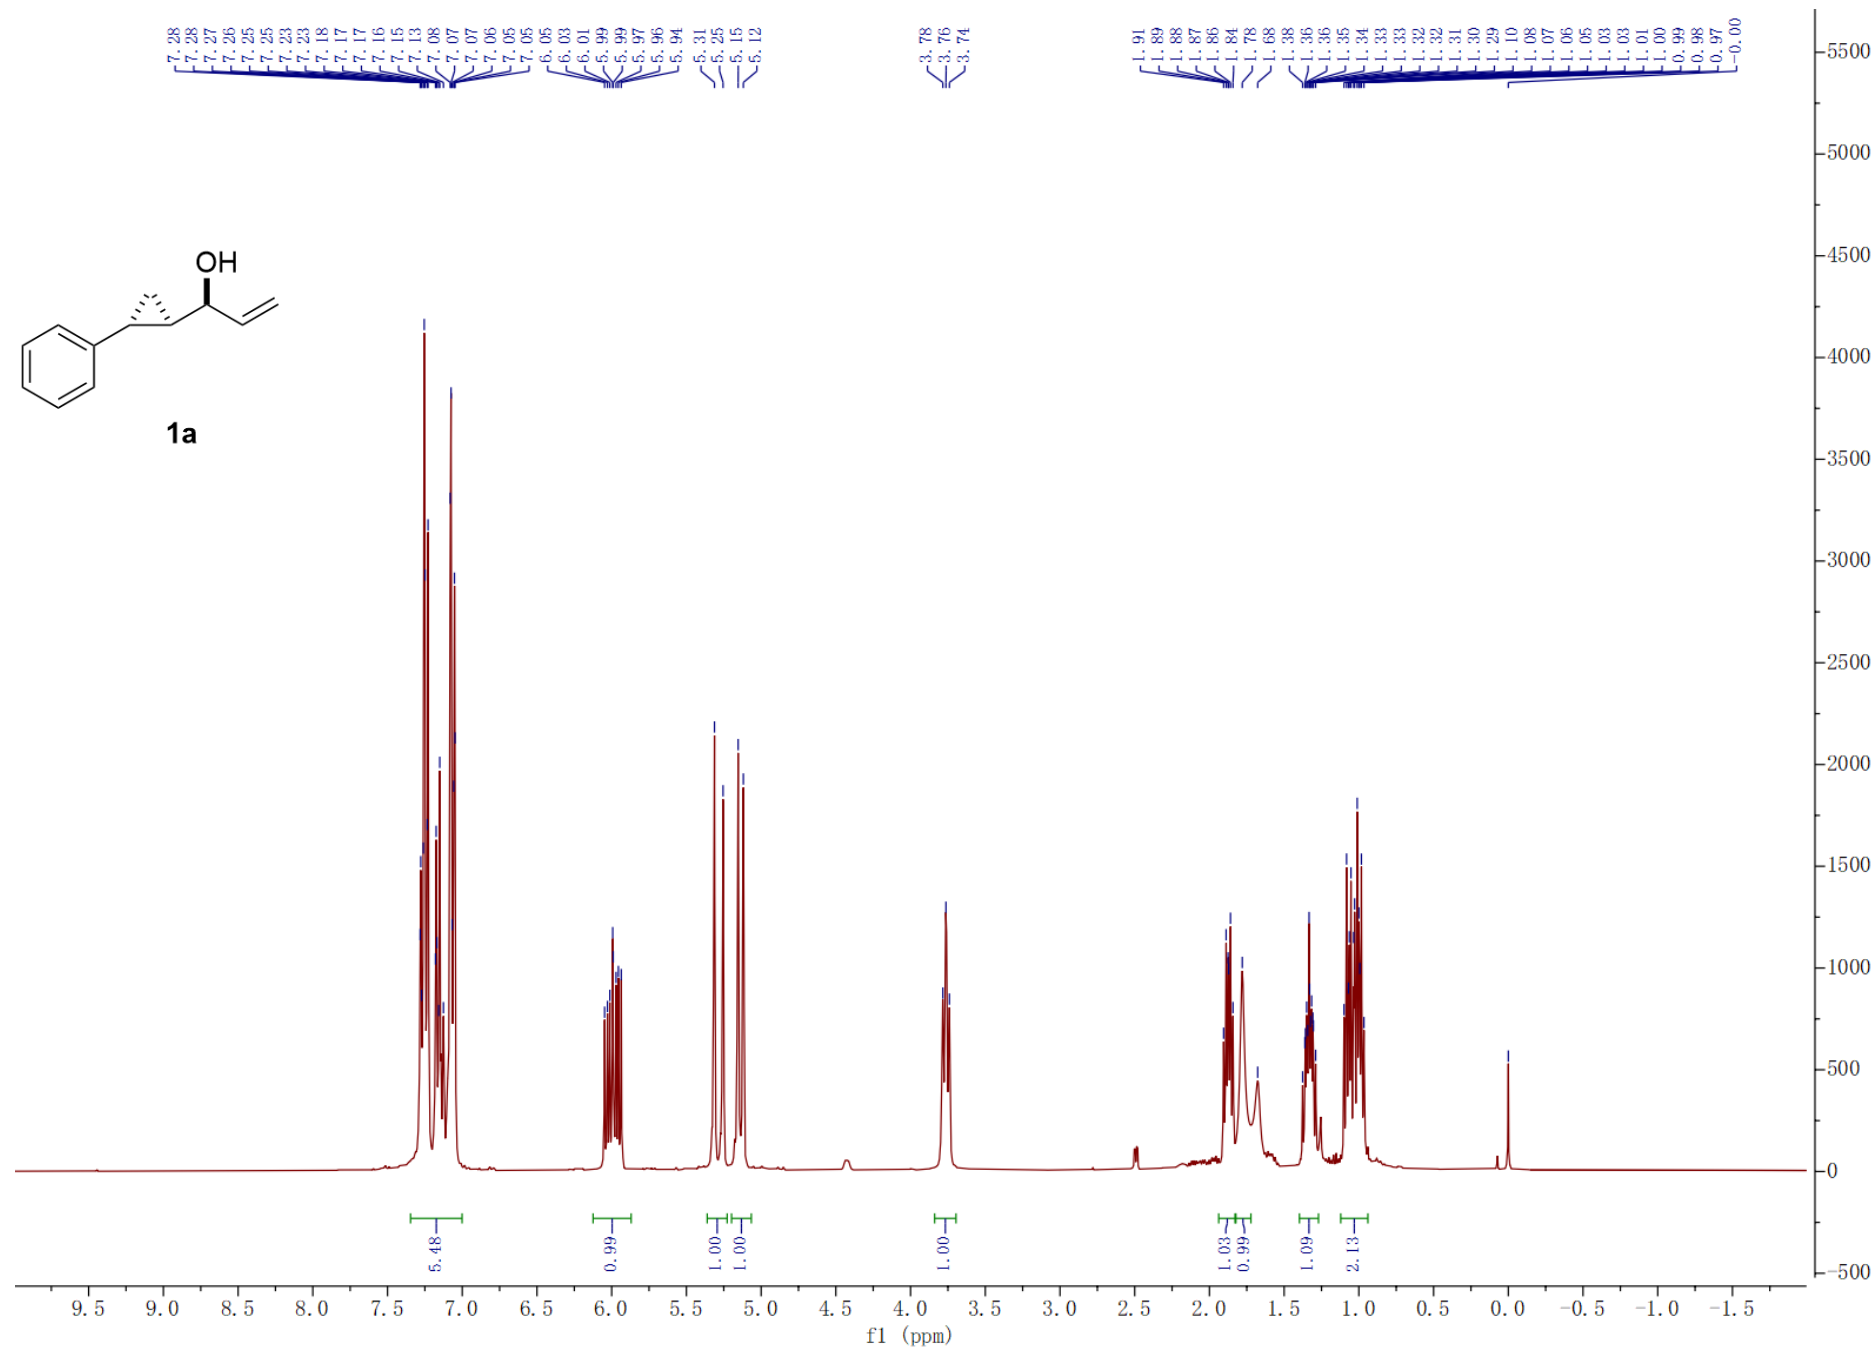



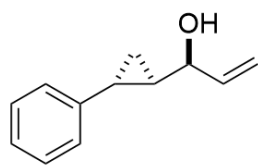

**1a**

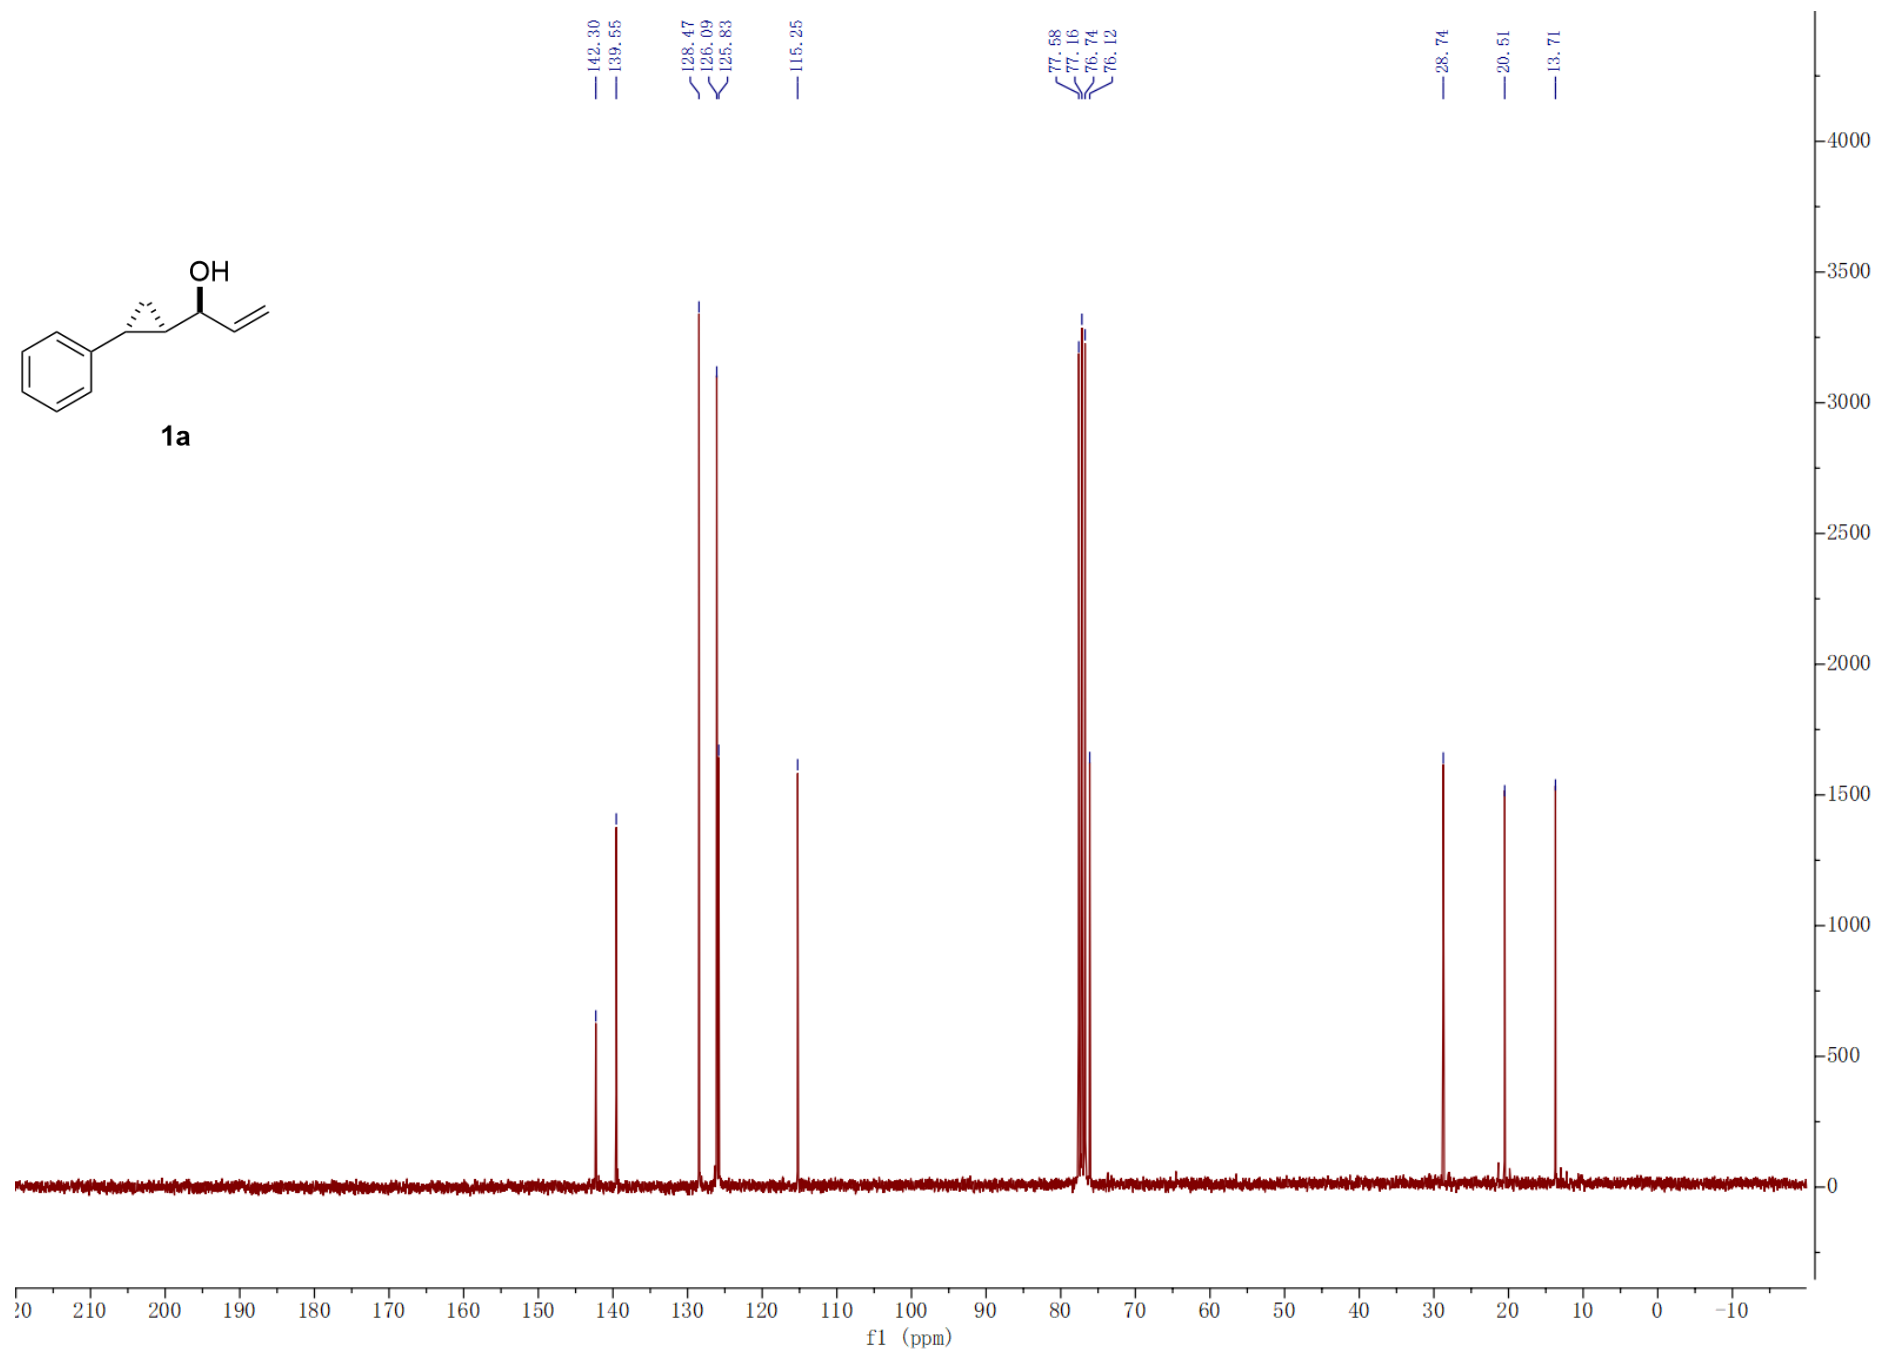

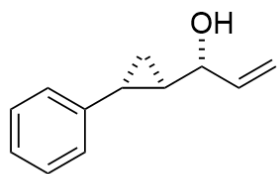

**1a'**

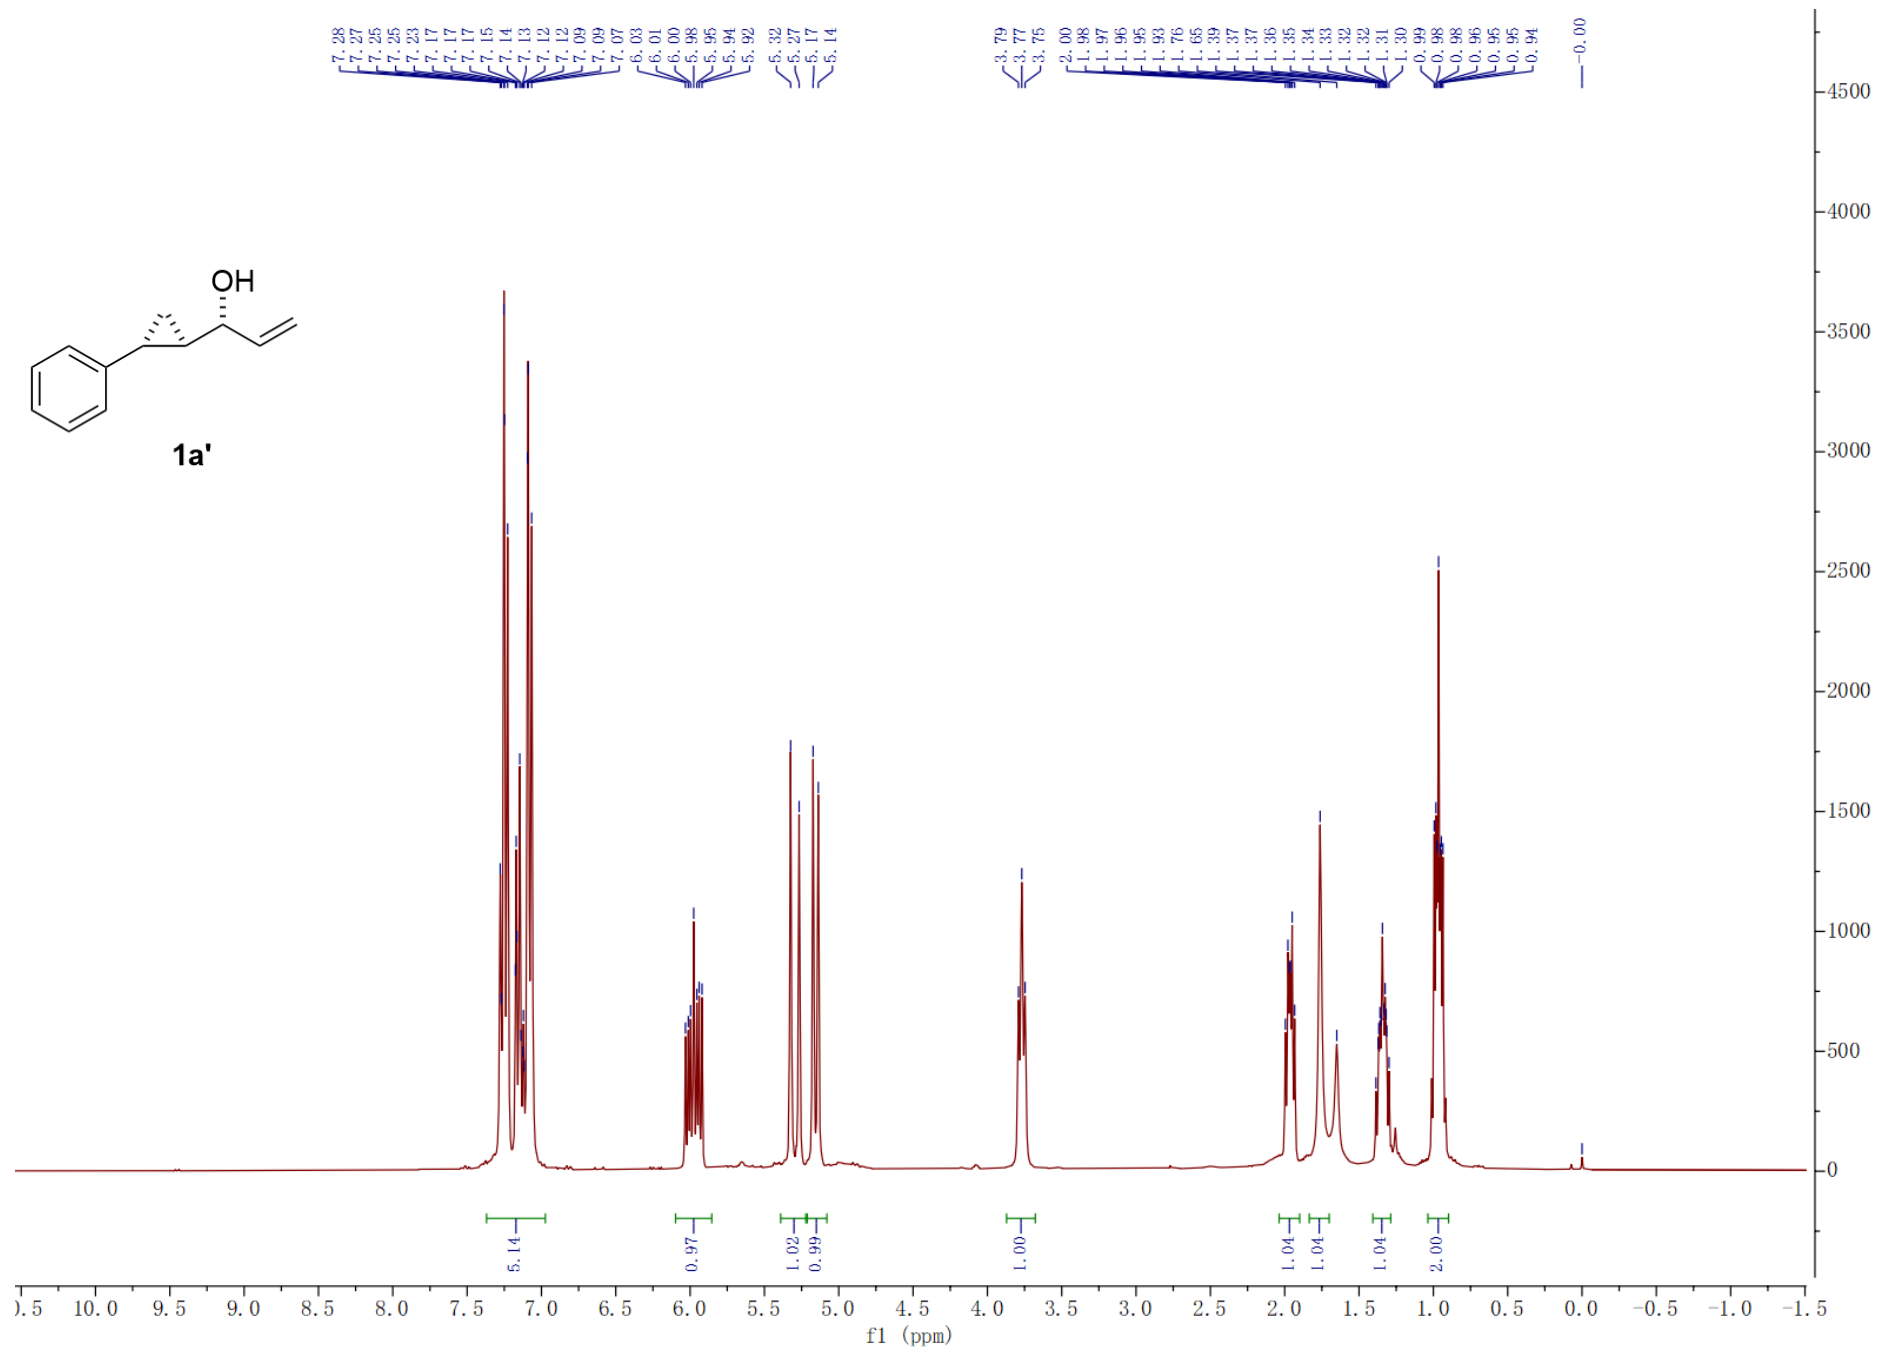

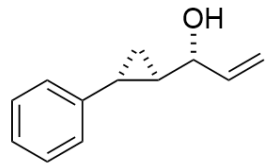

**1a'**

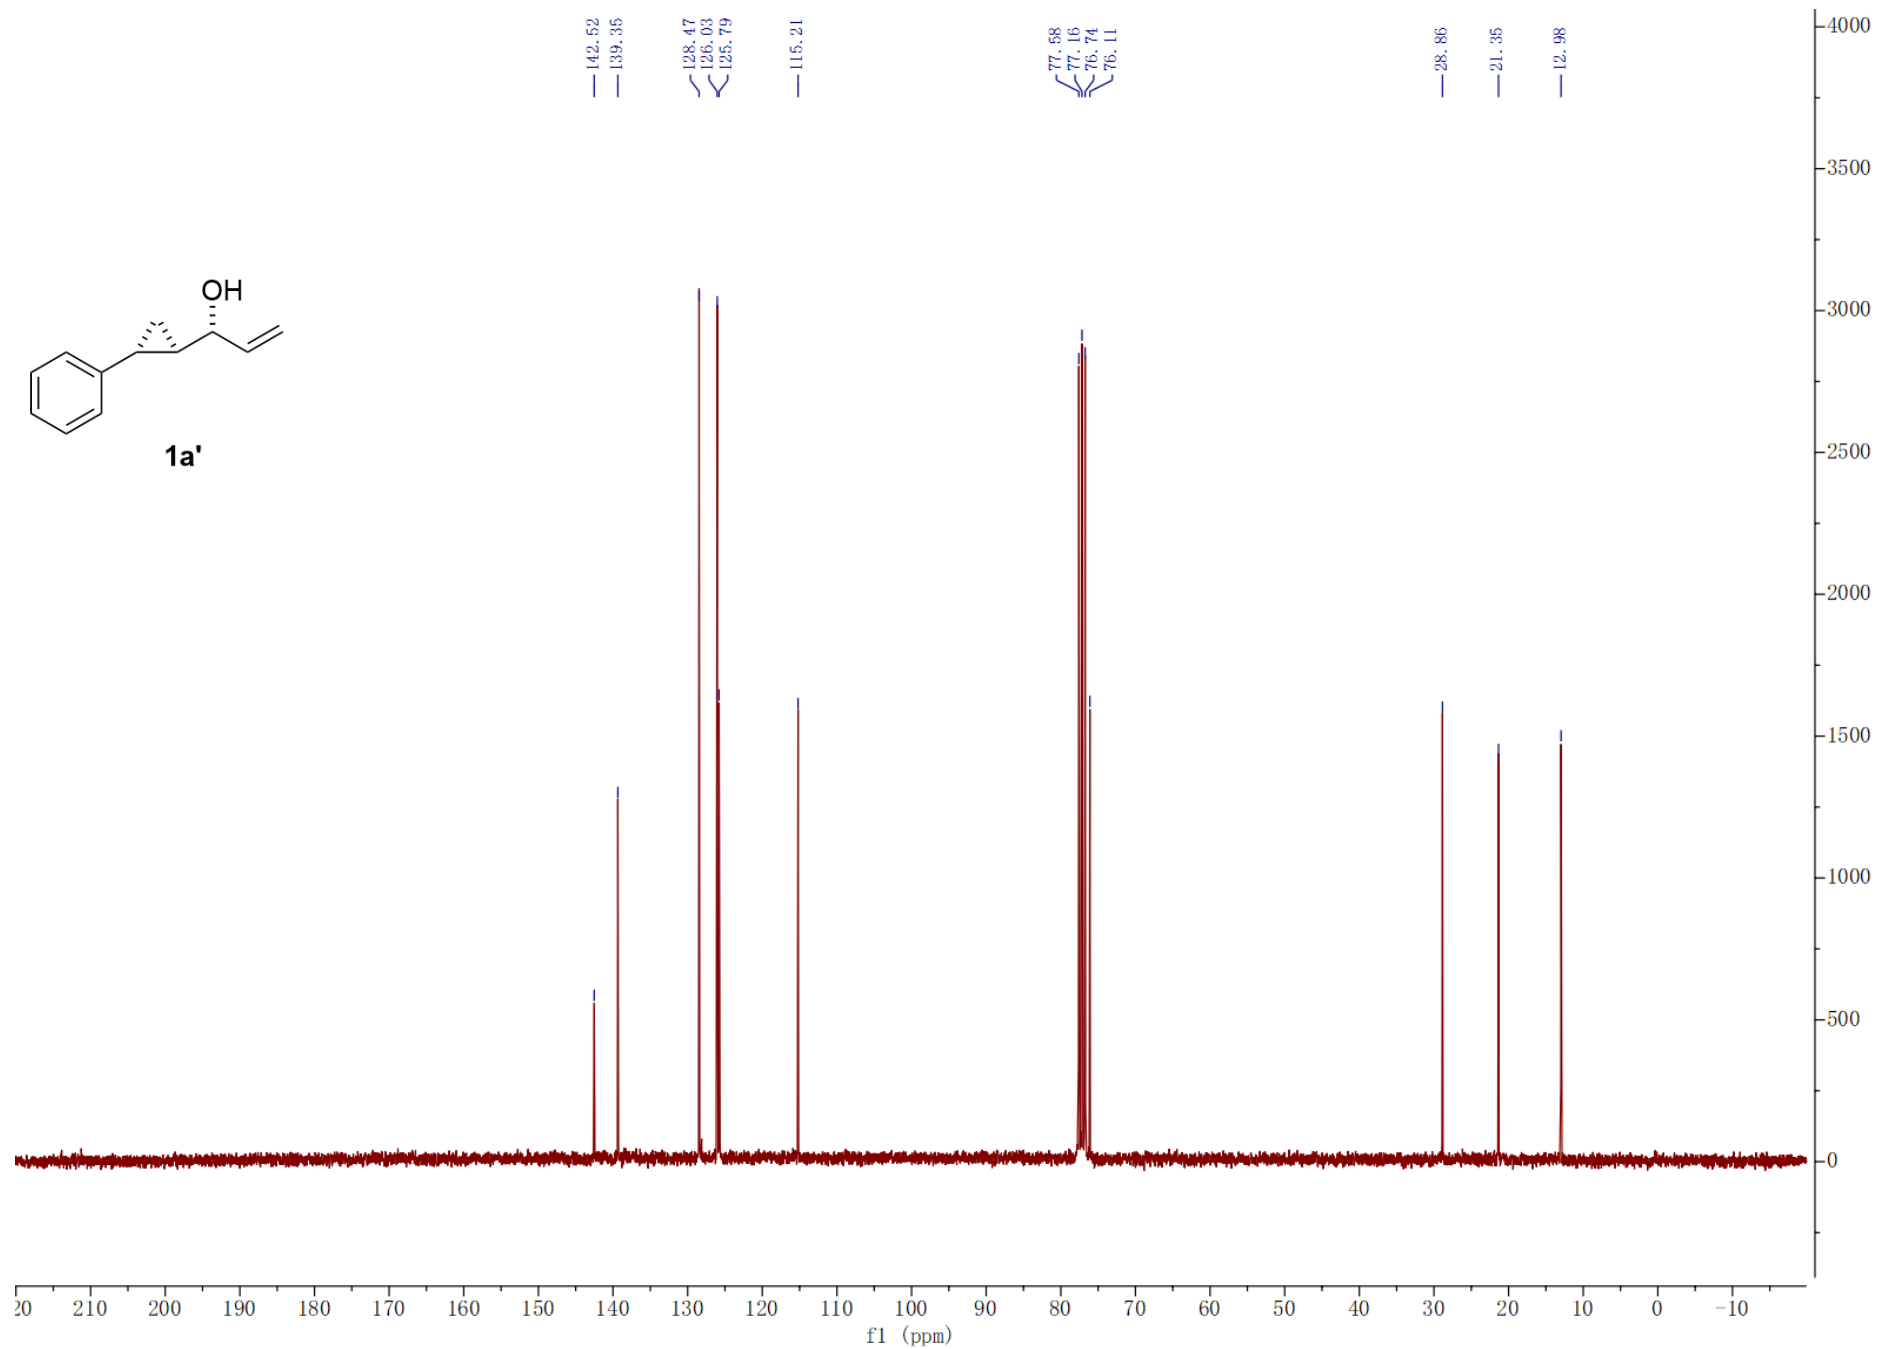

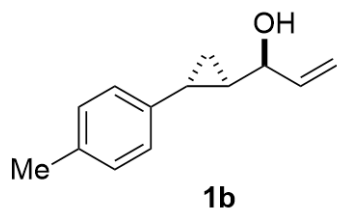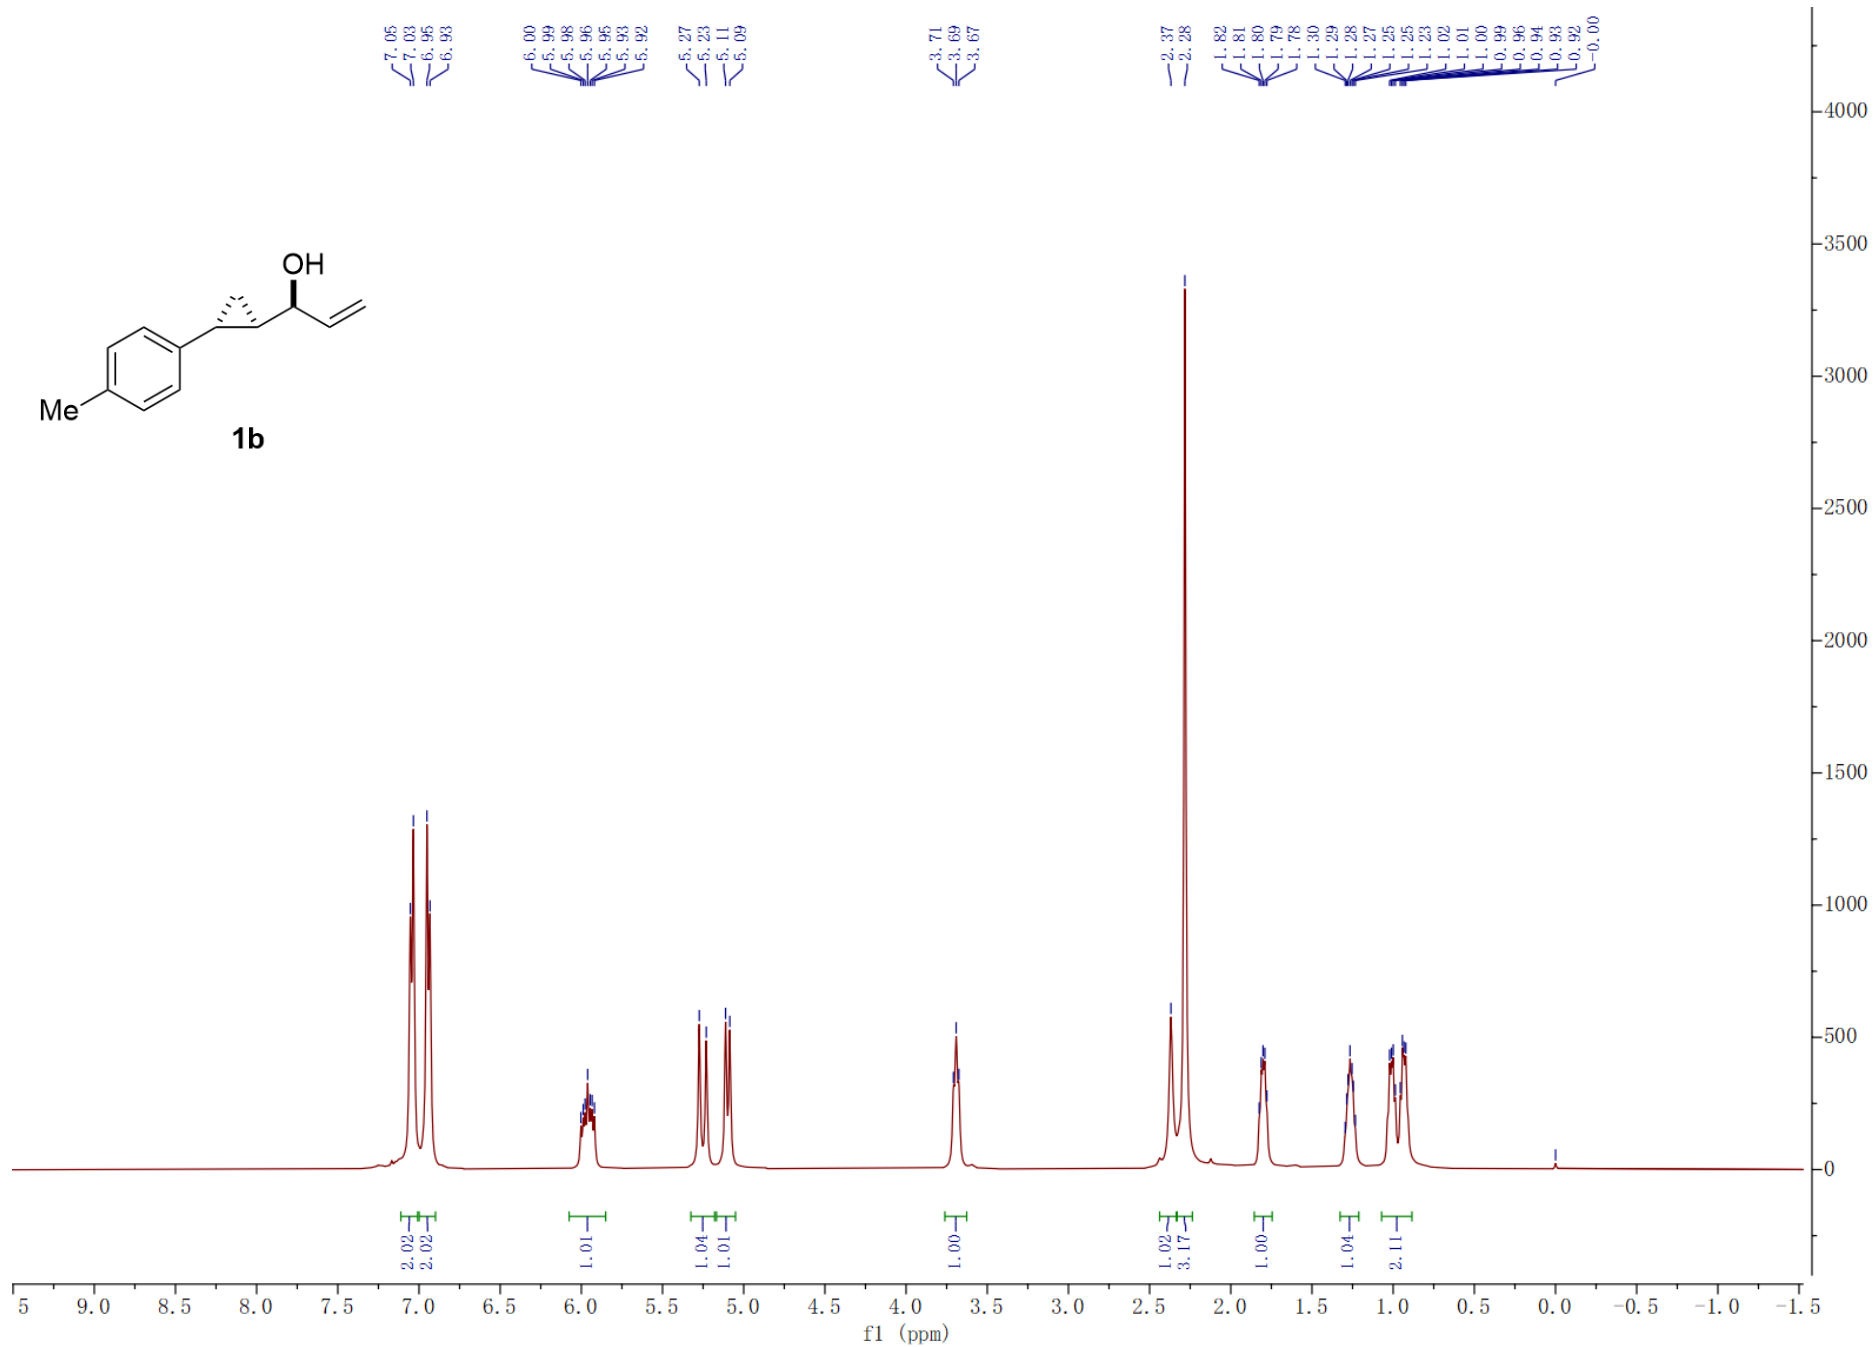

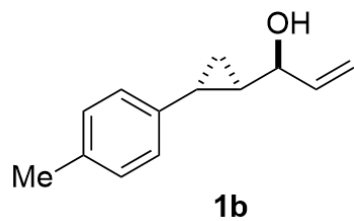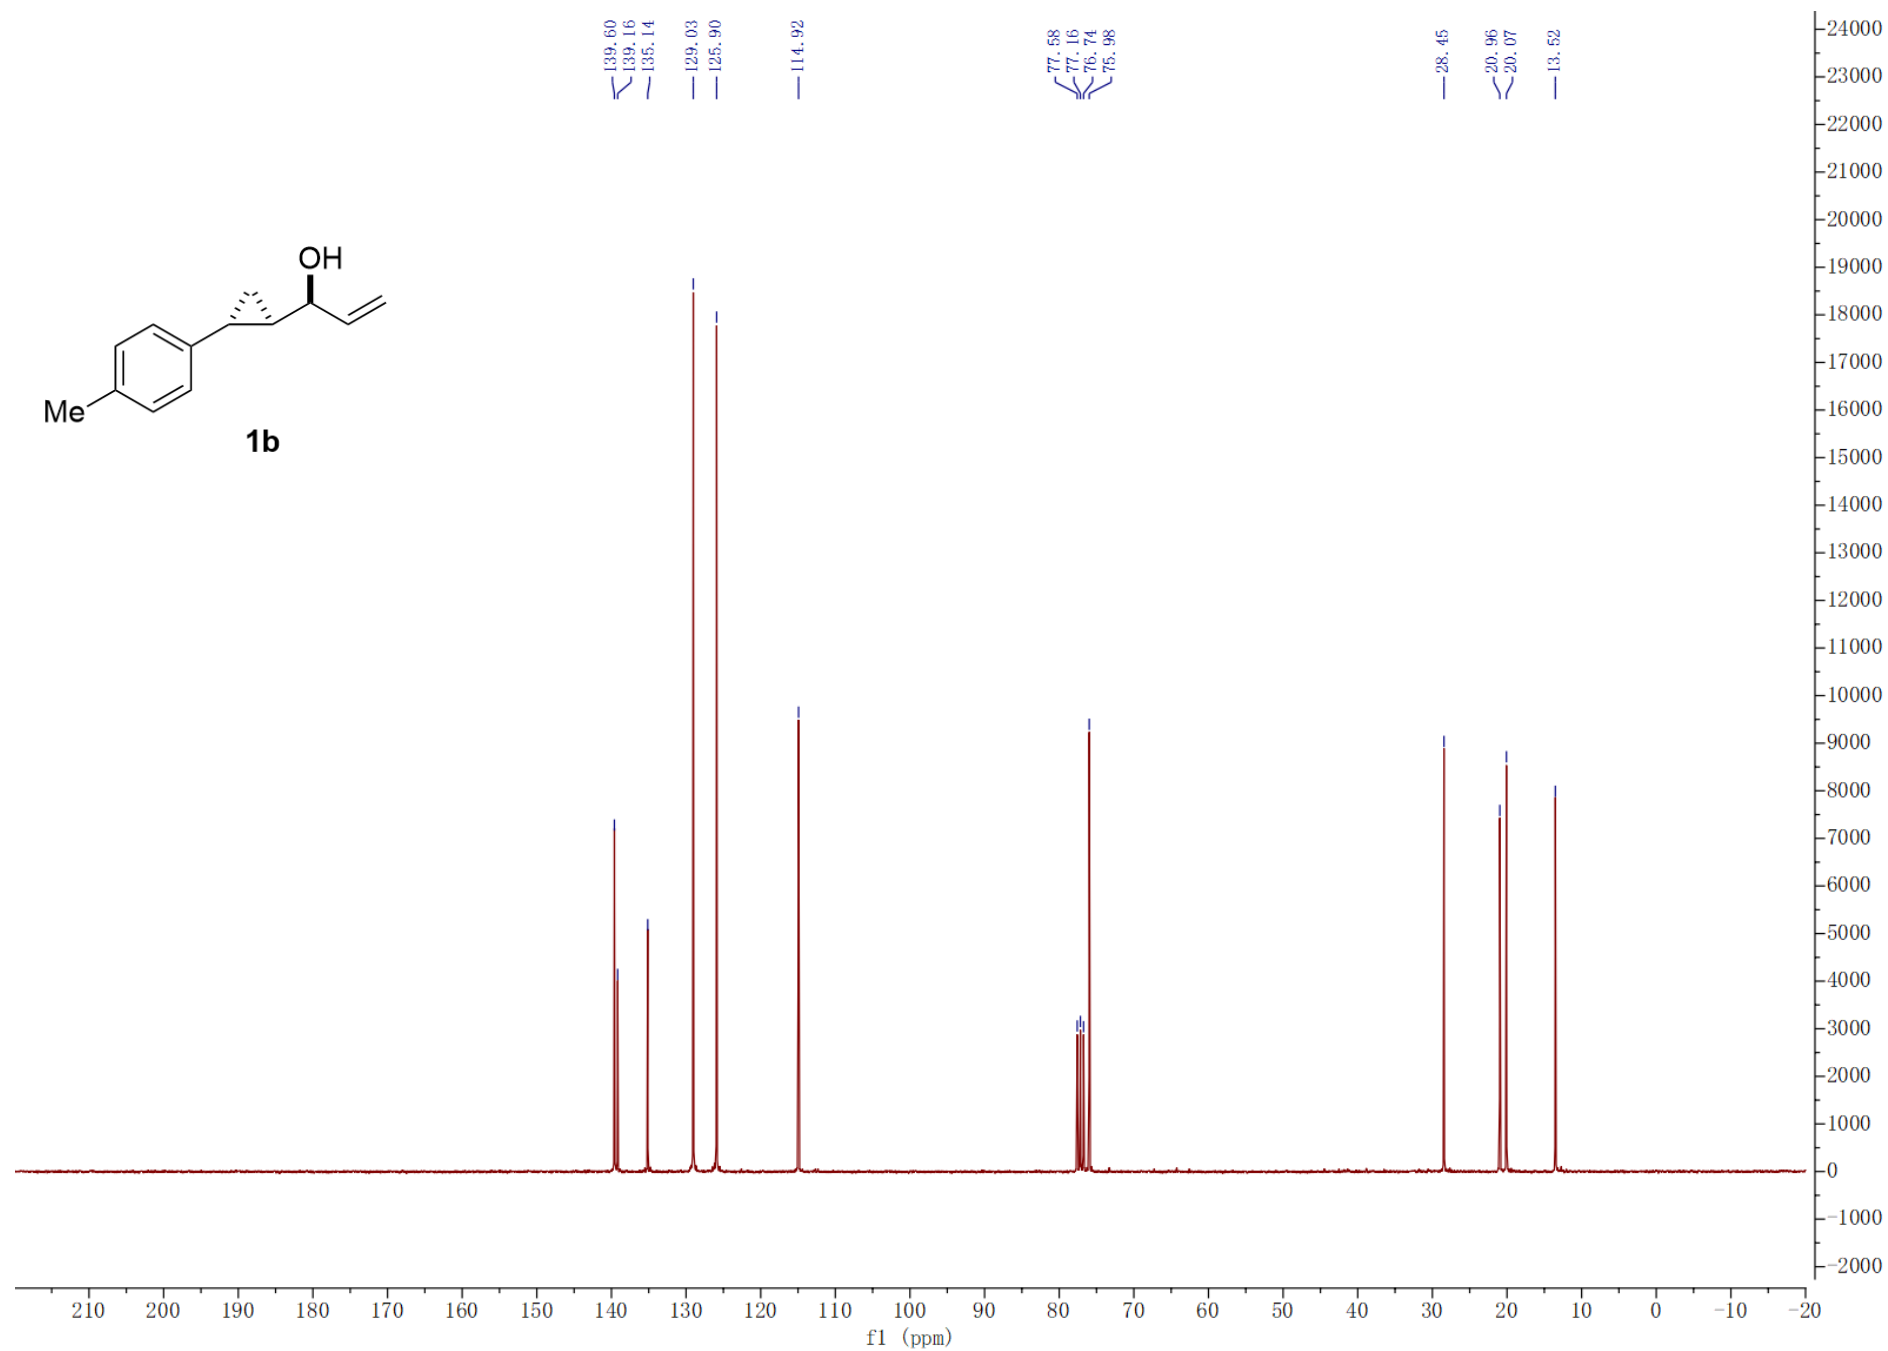

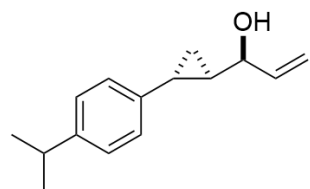

**1c**

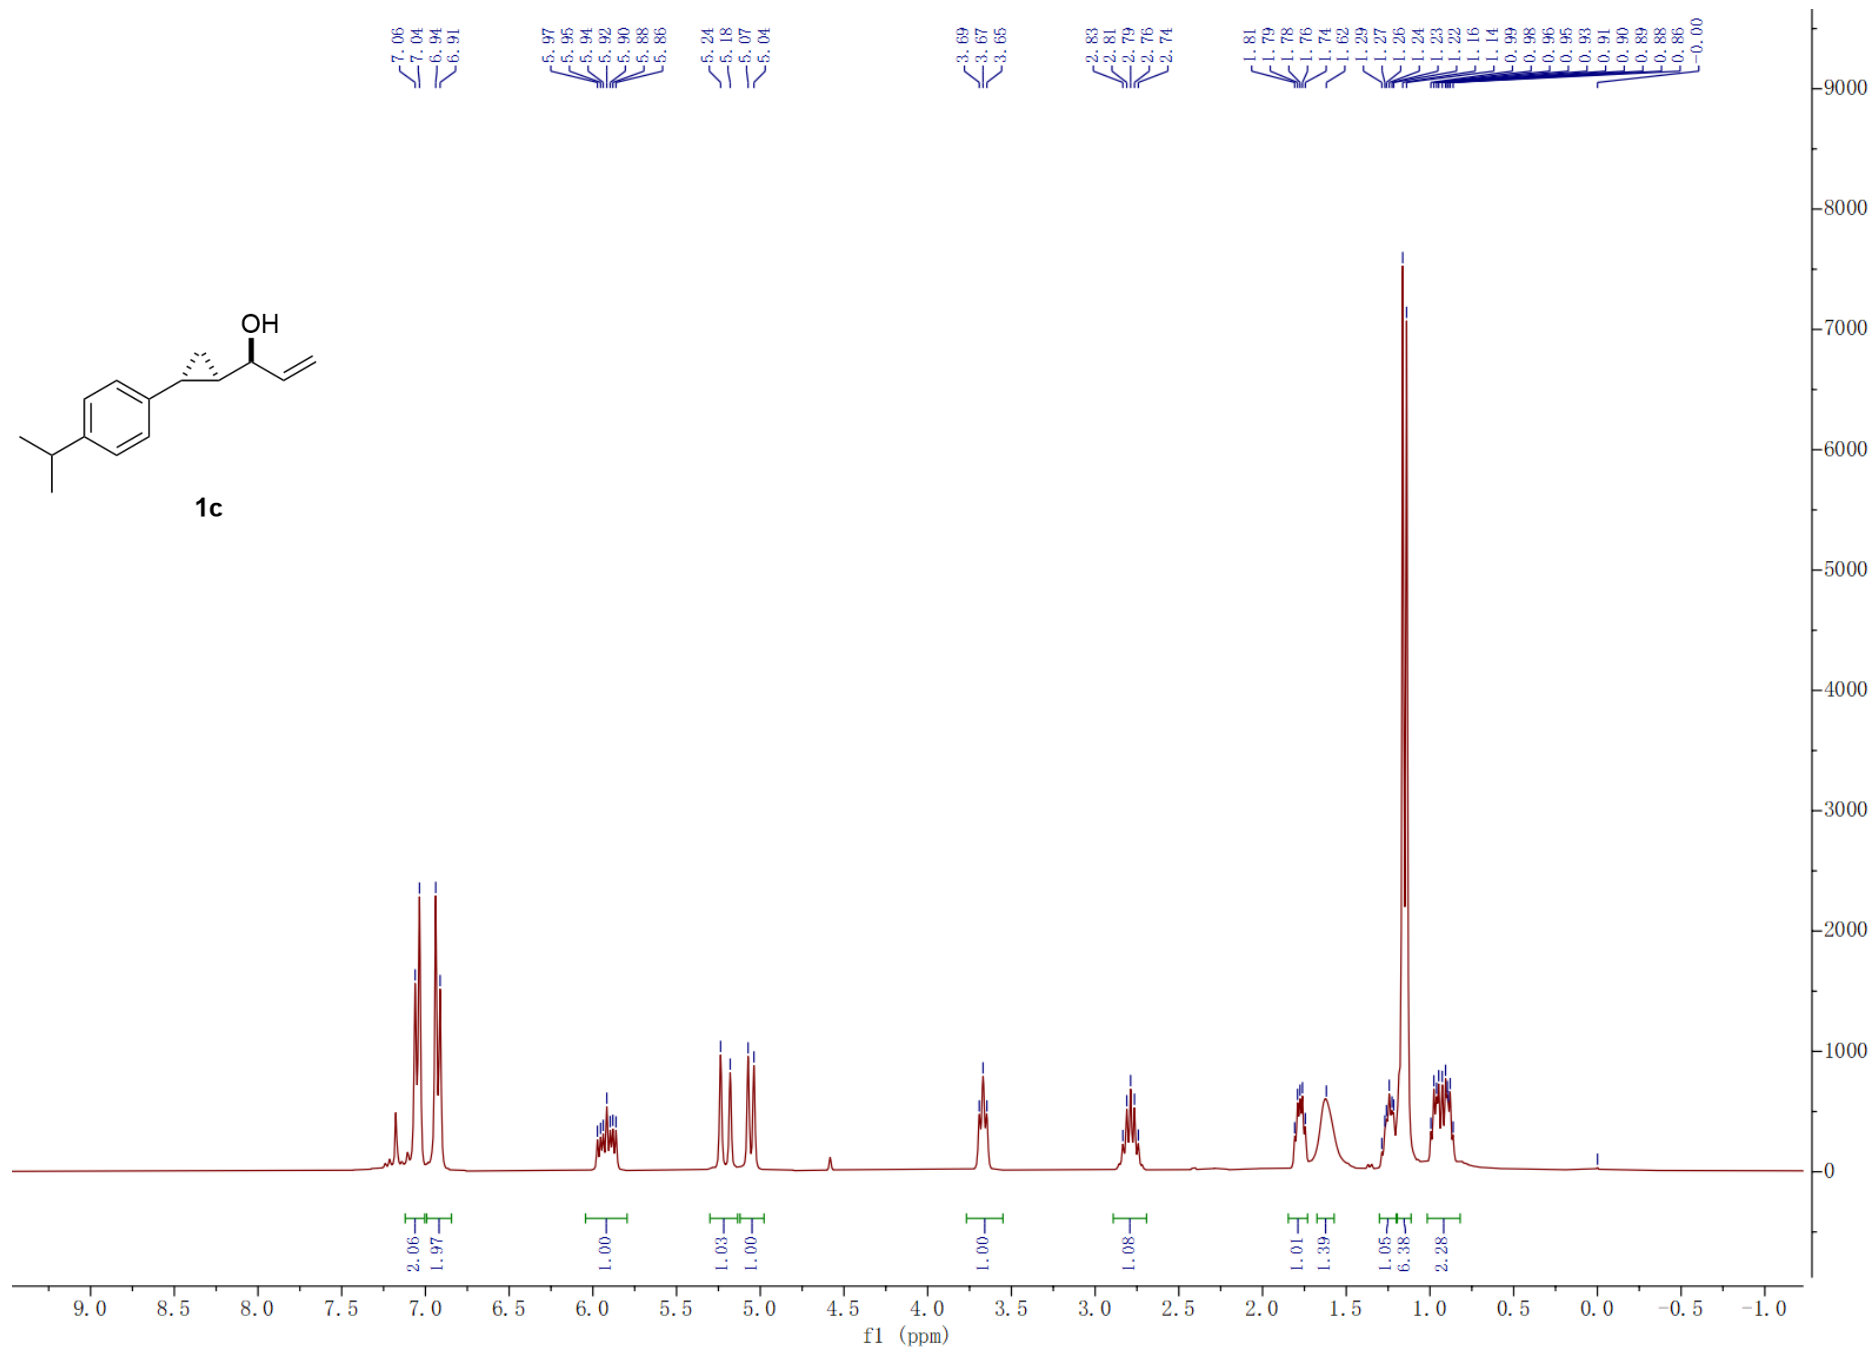

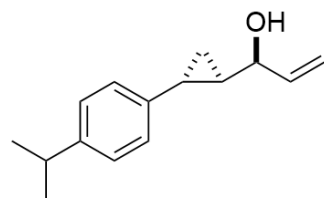

**1c**

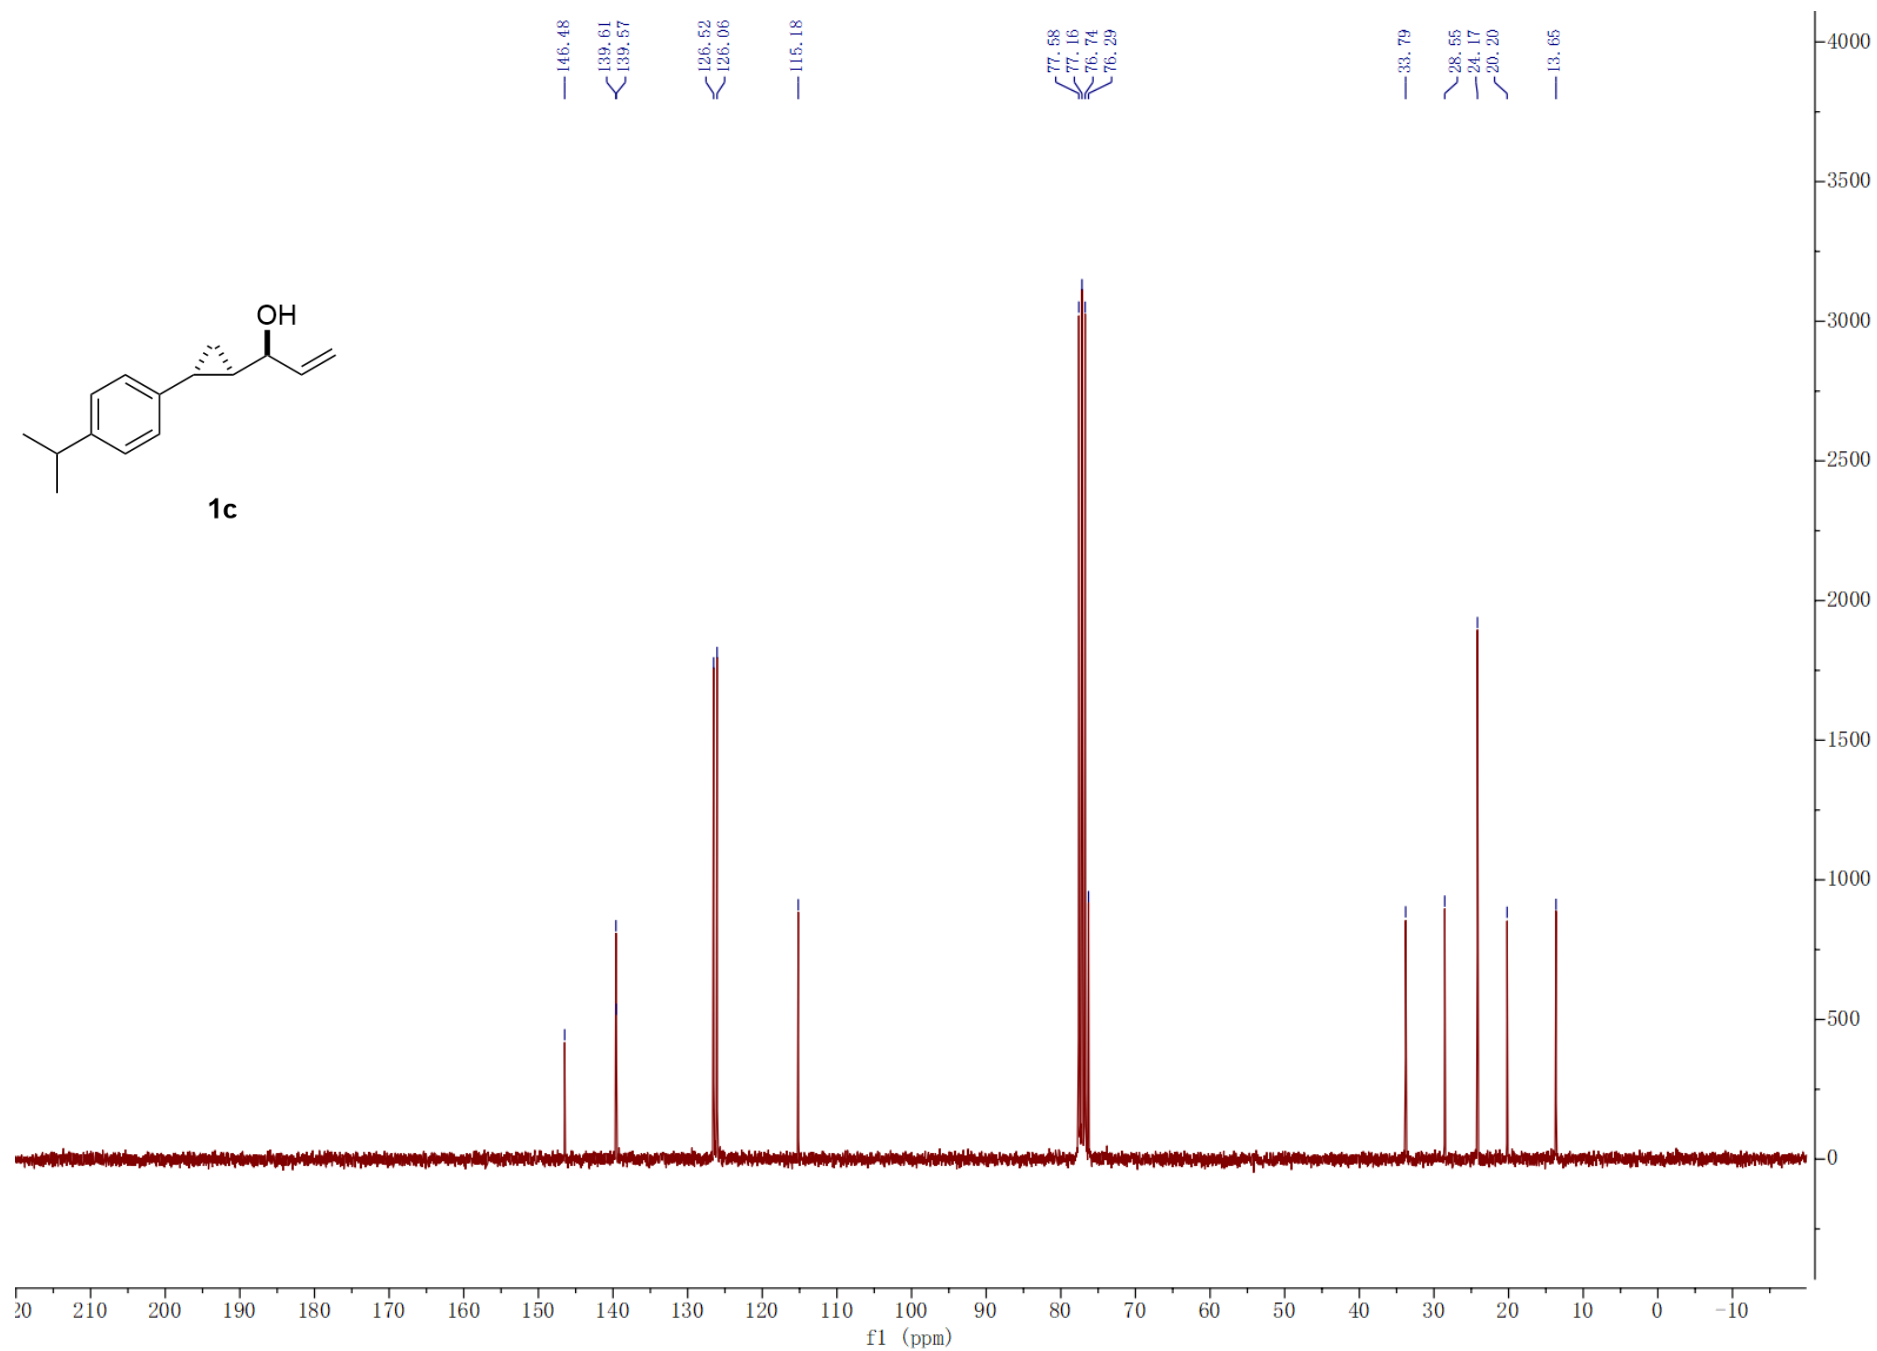

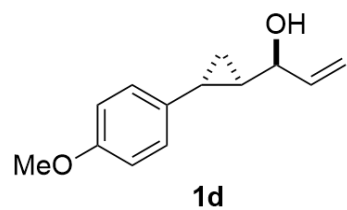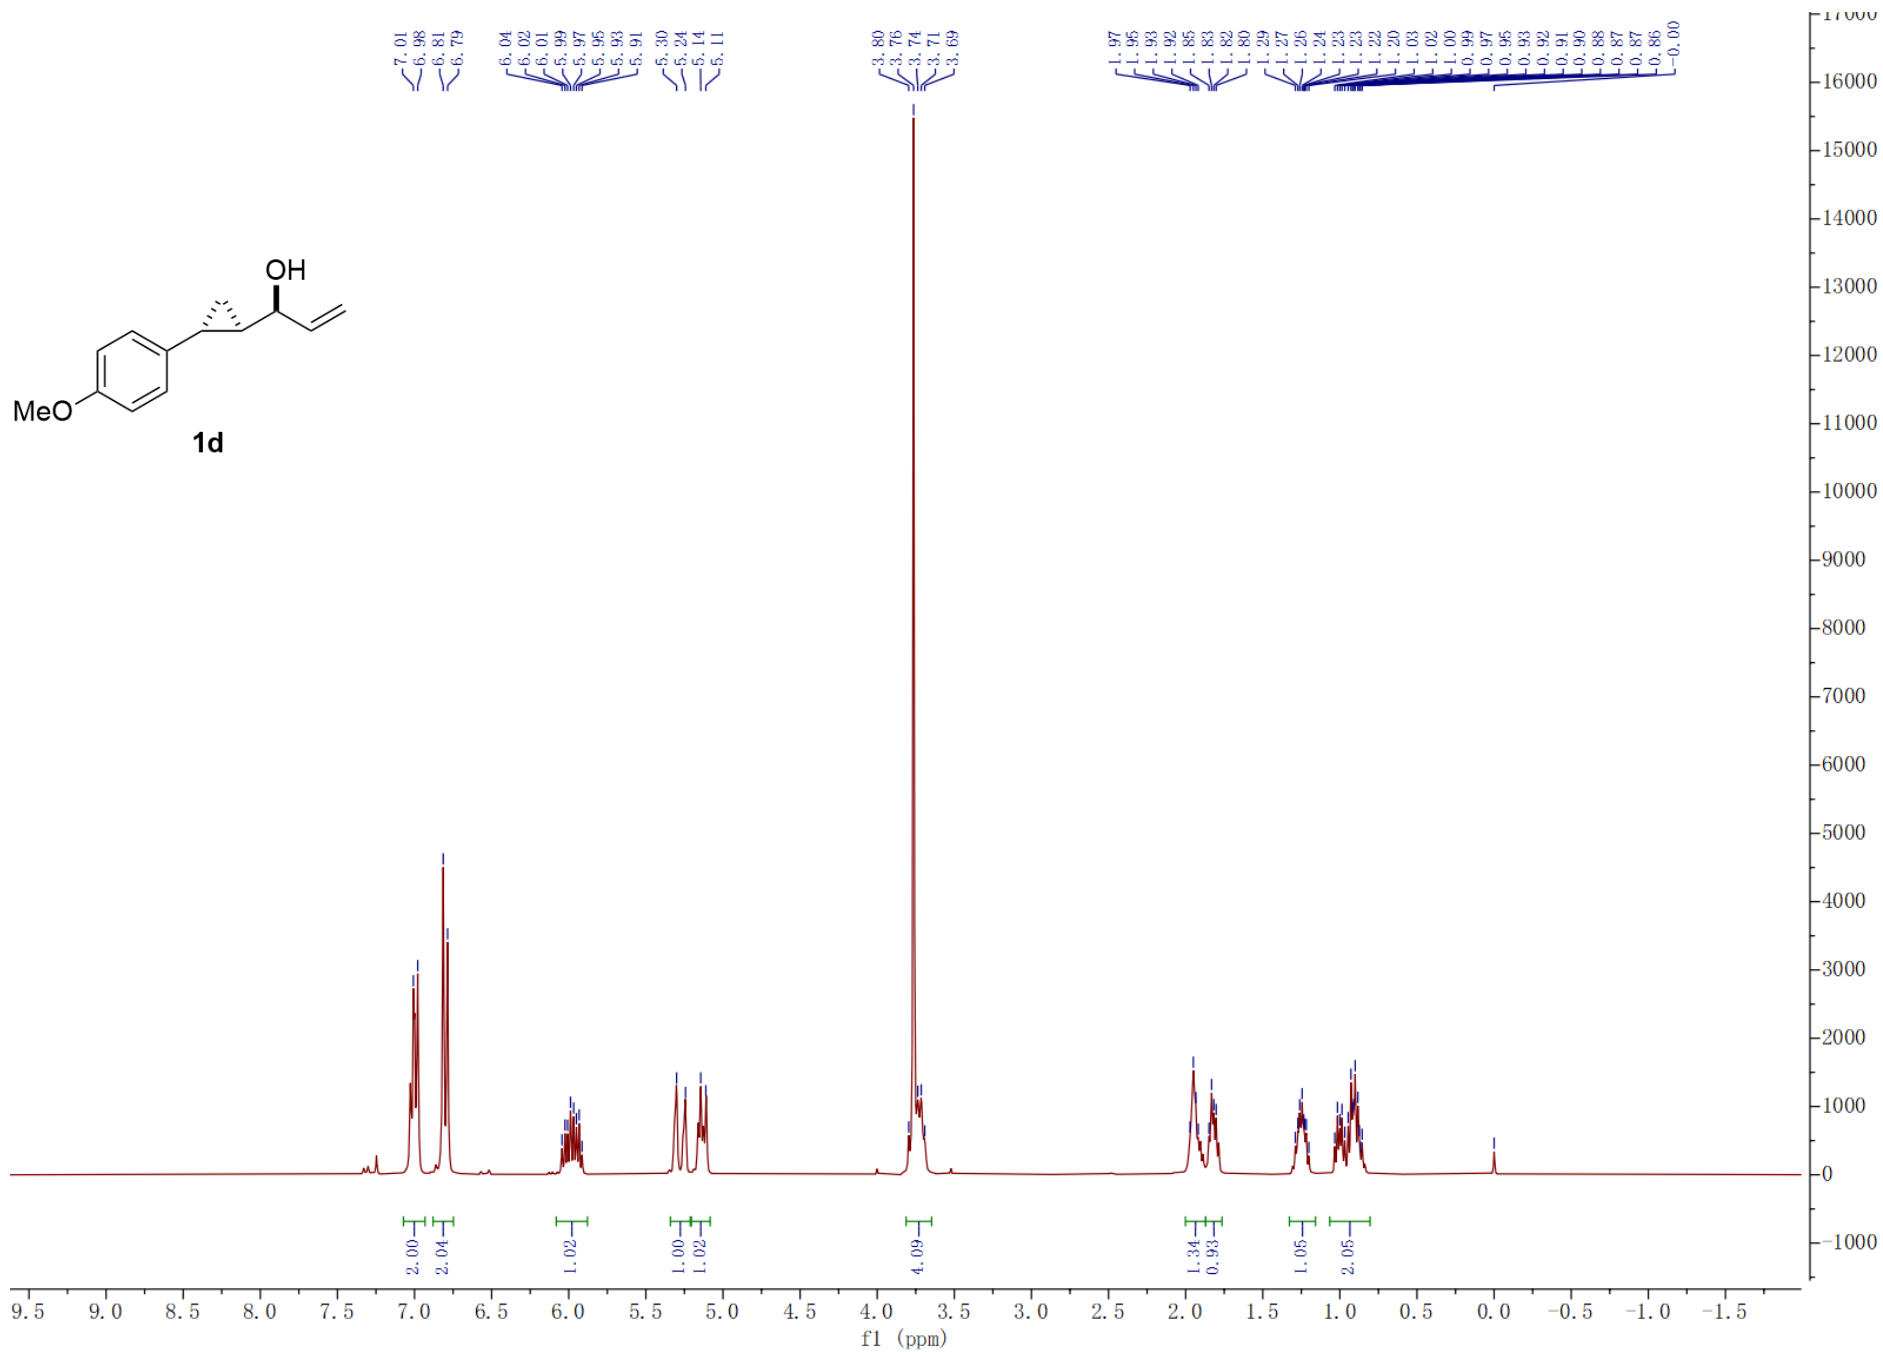



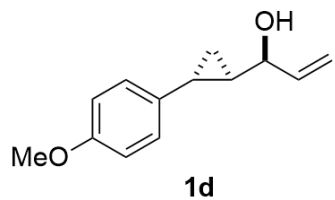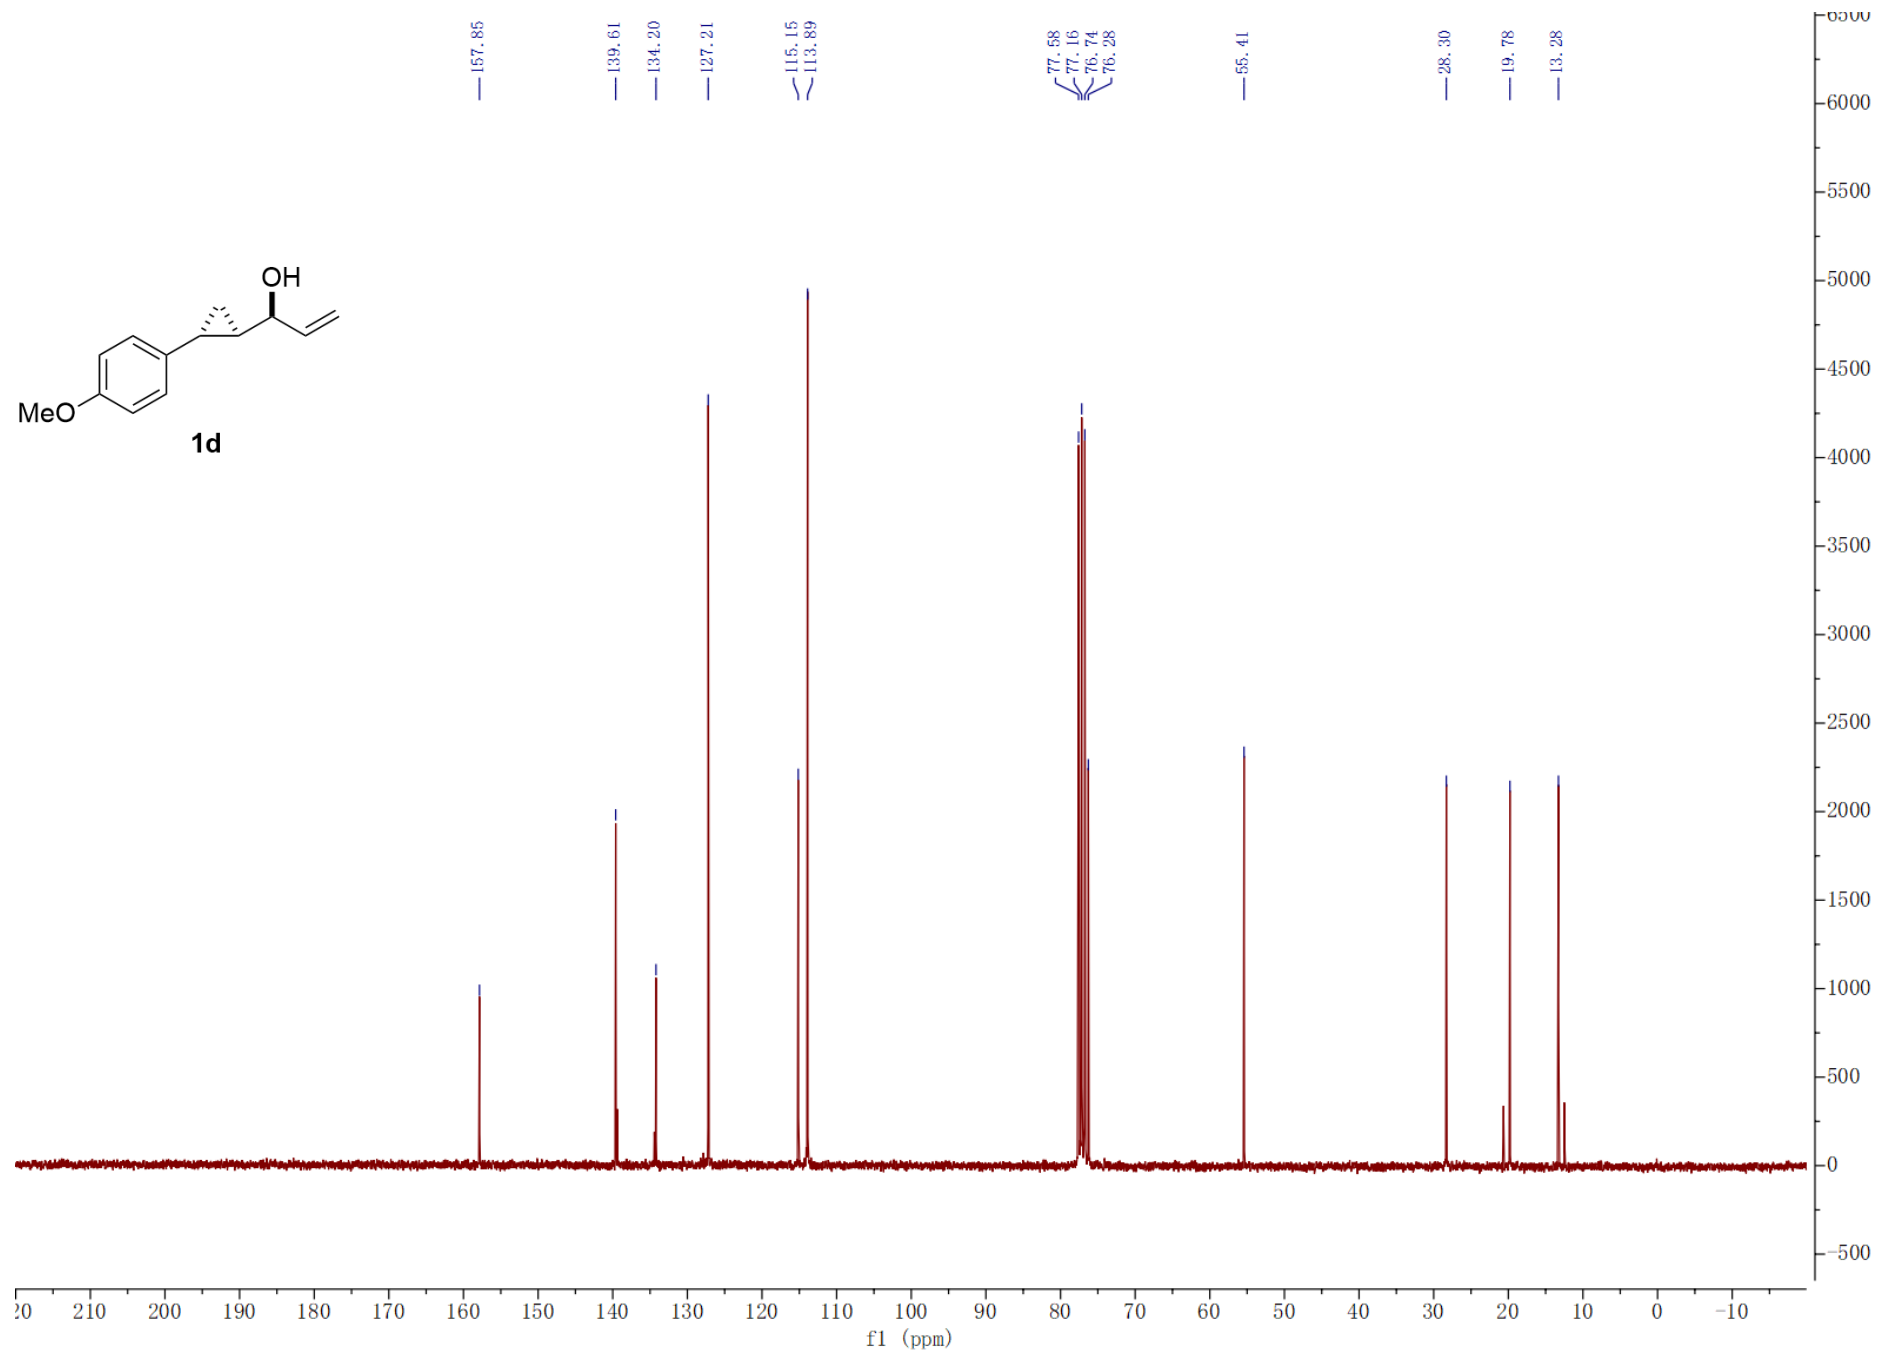

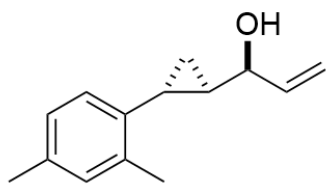

**1e**

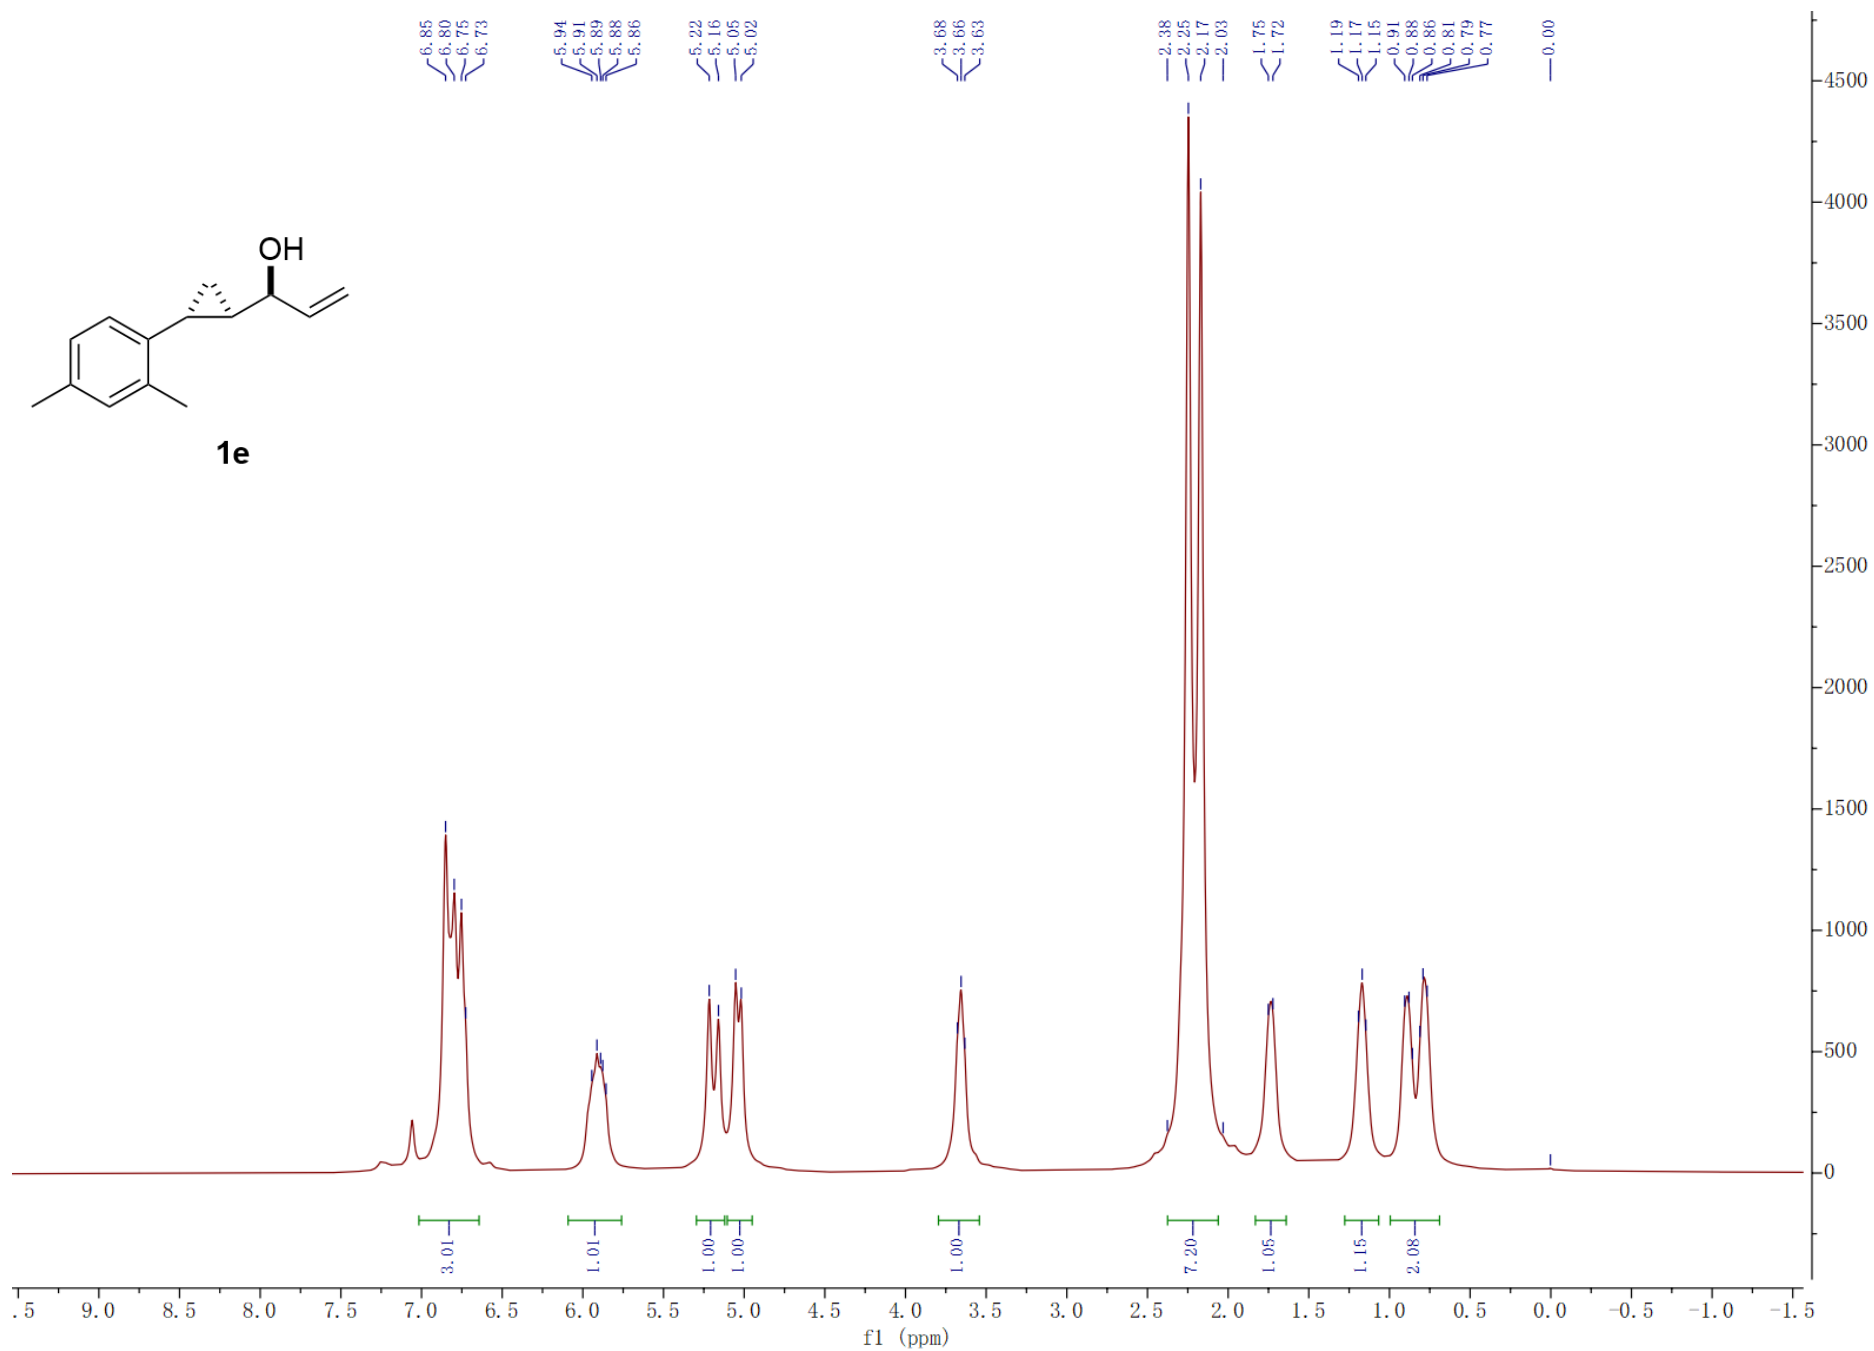

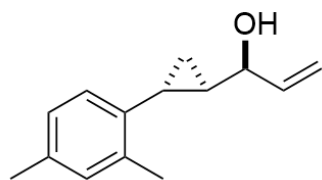

**1e**

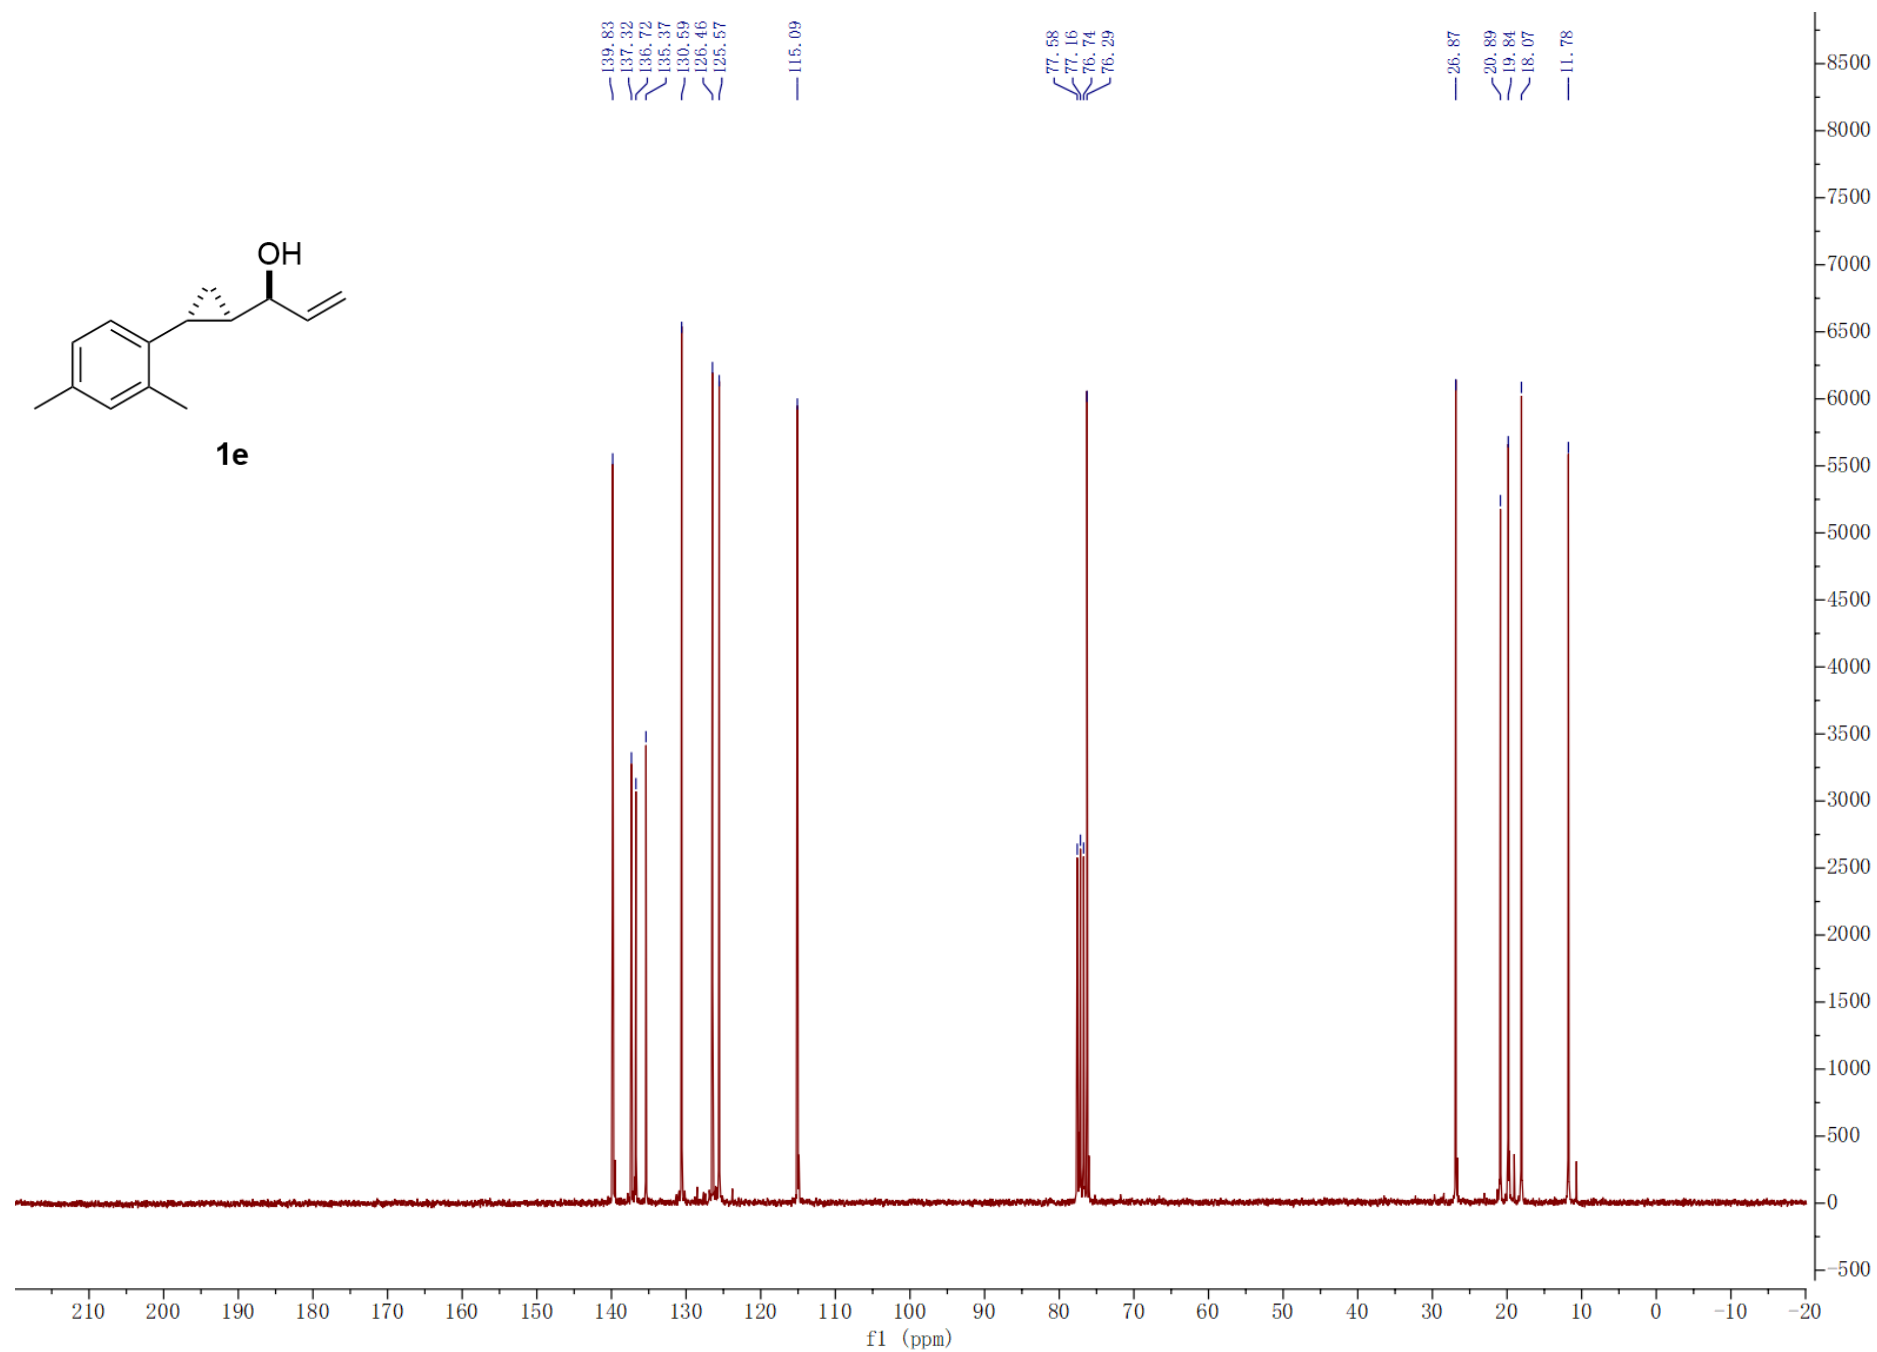

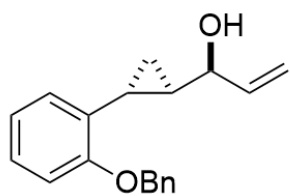

**1f**

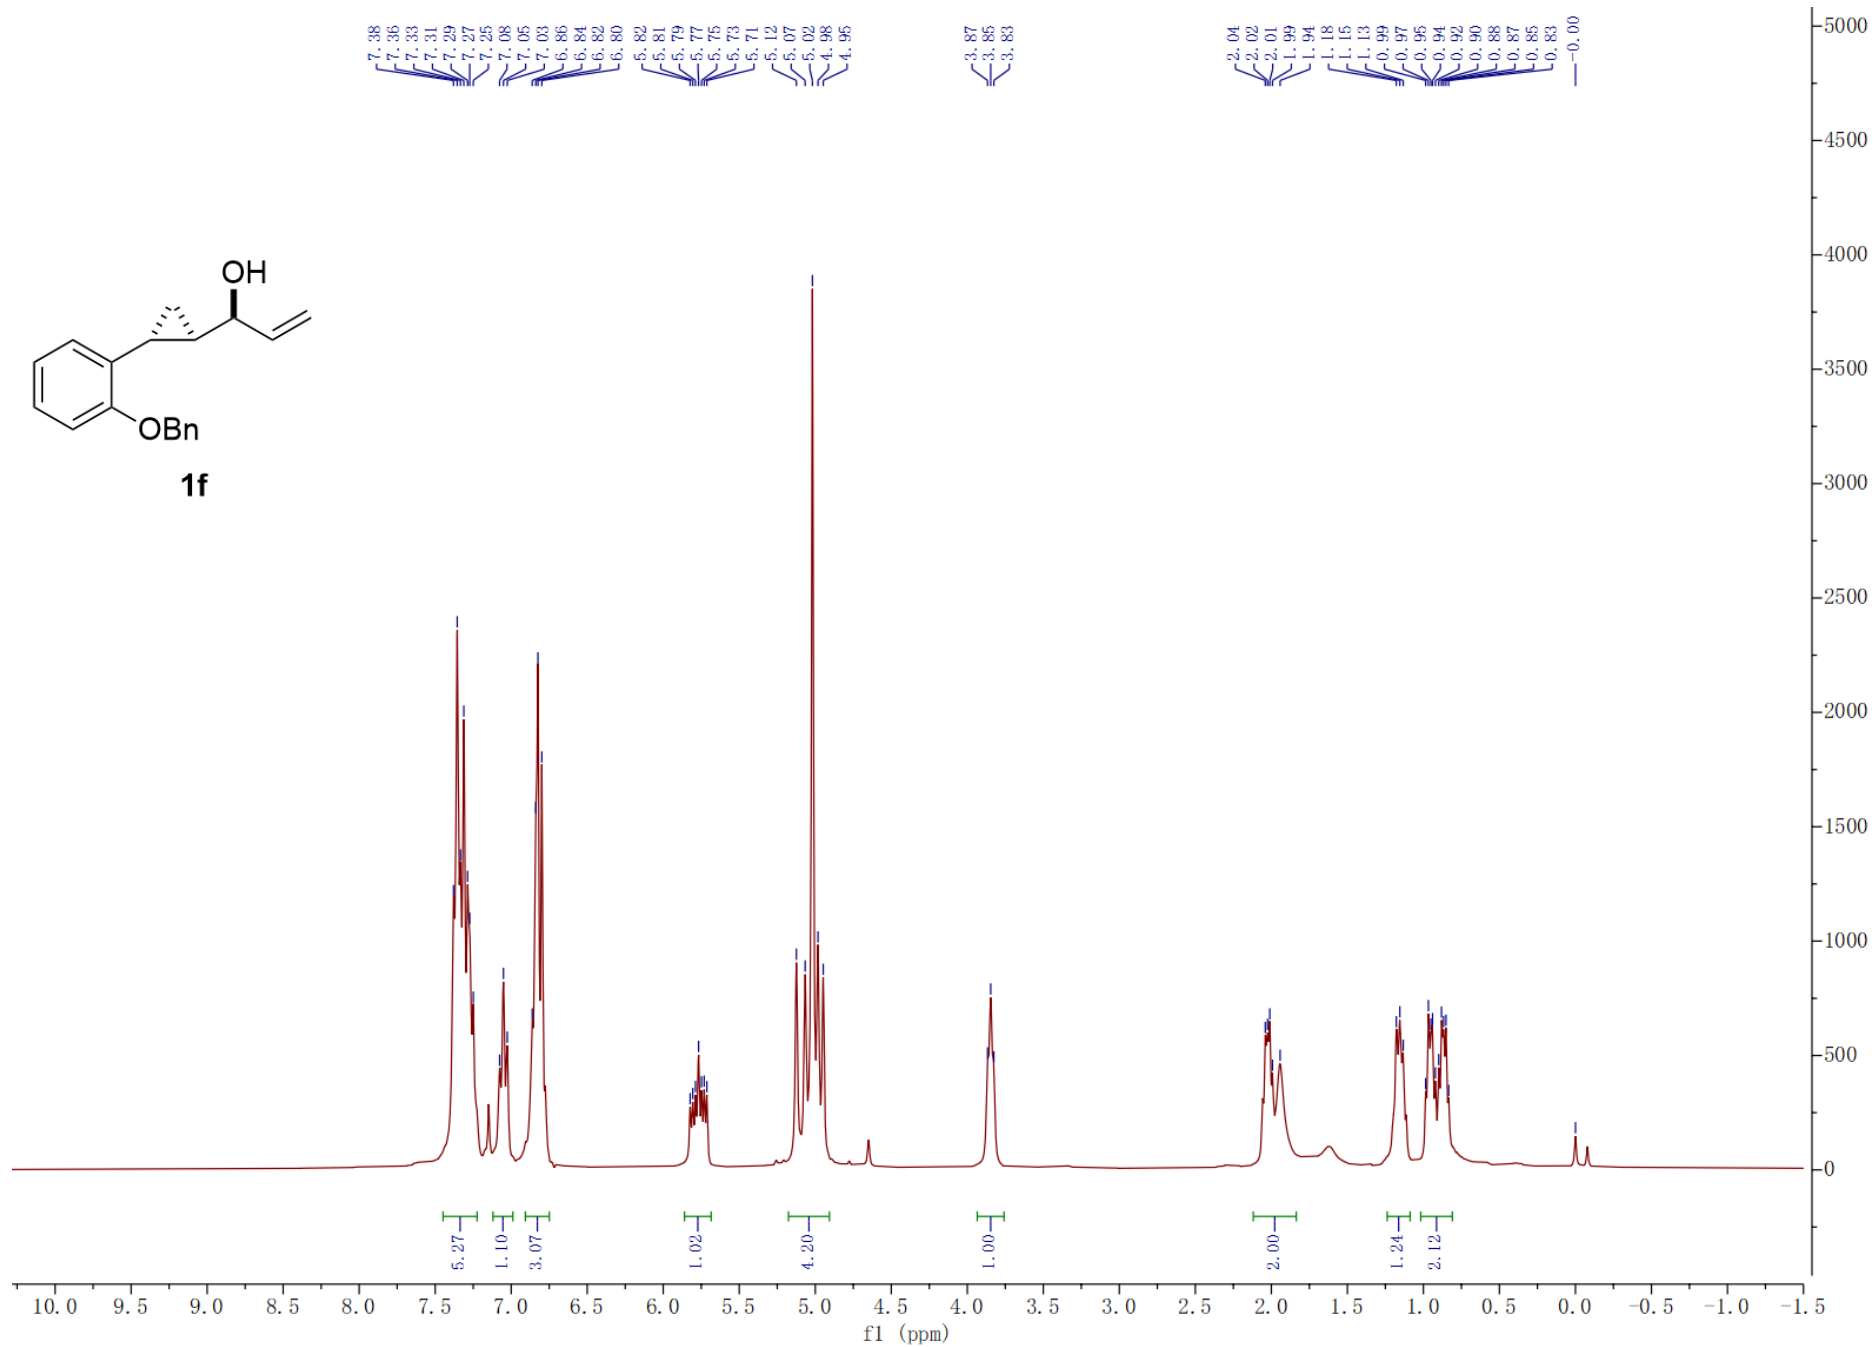

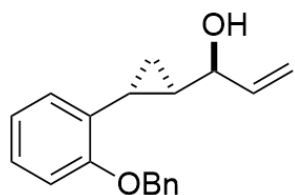

**1f**

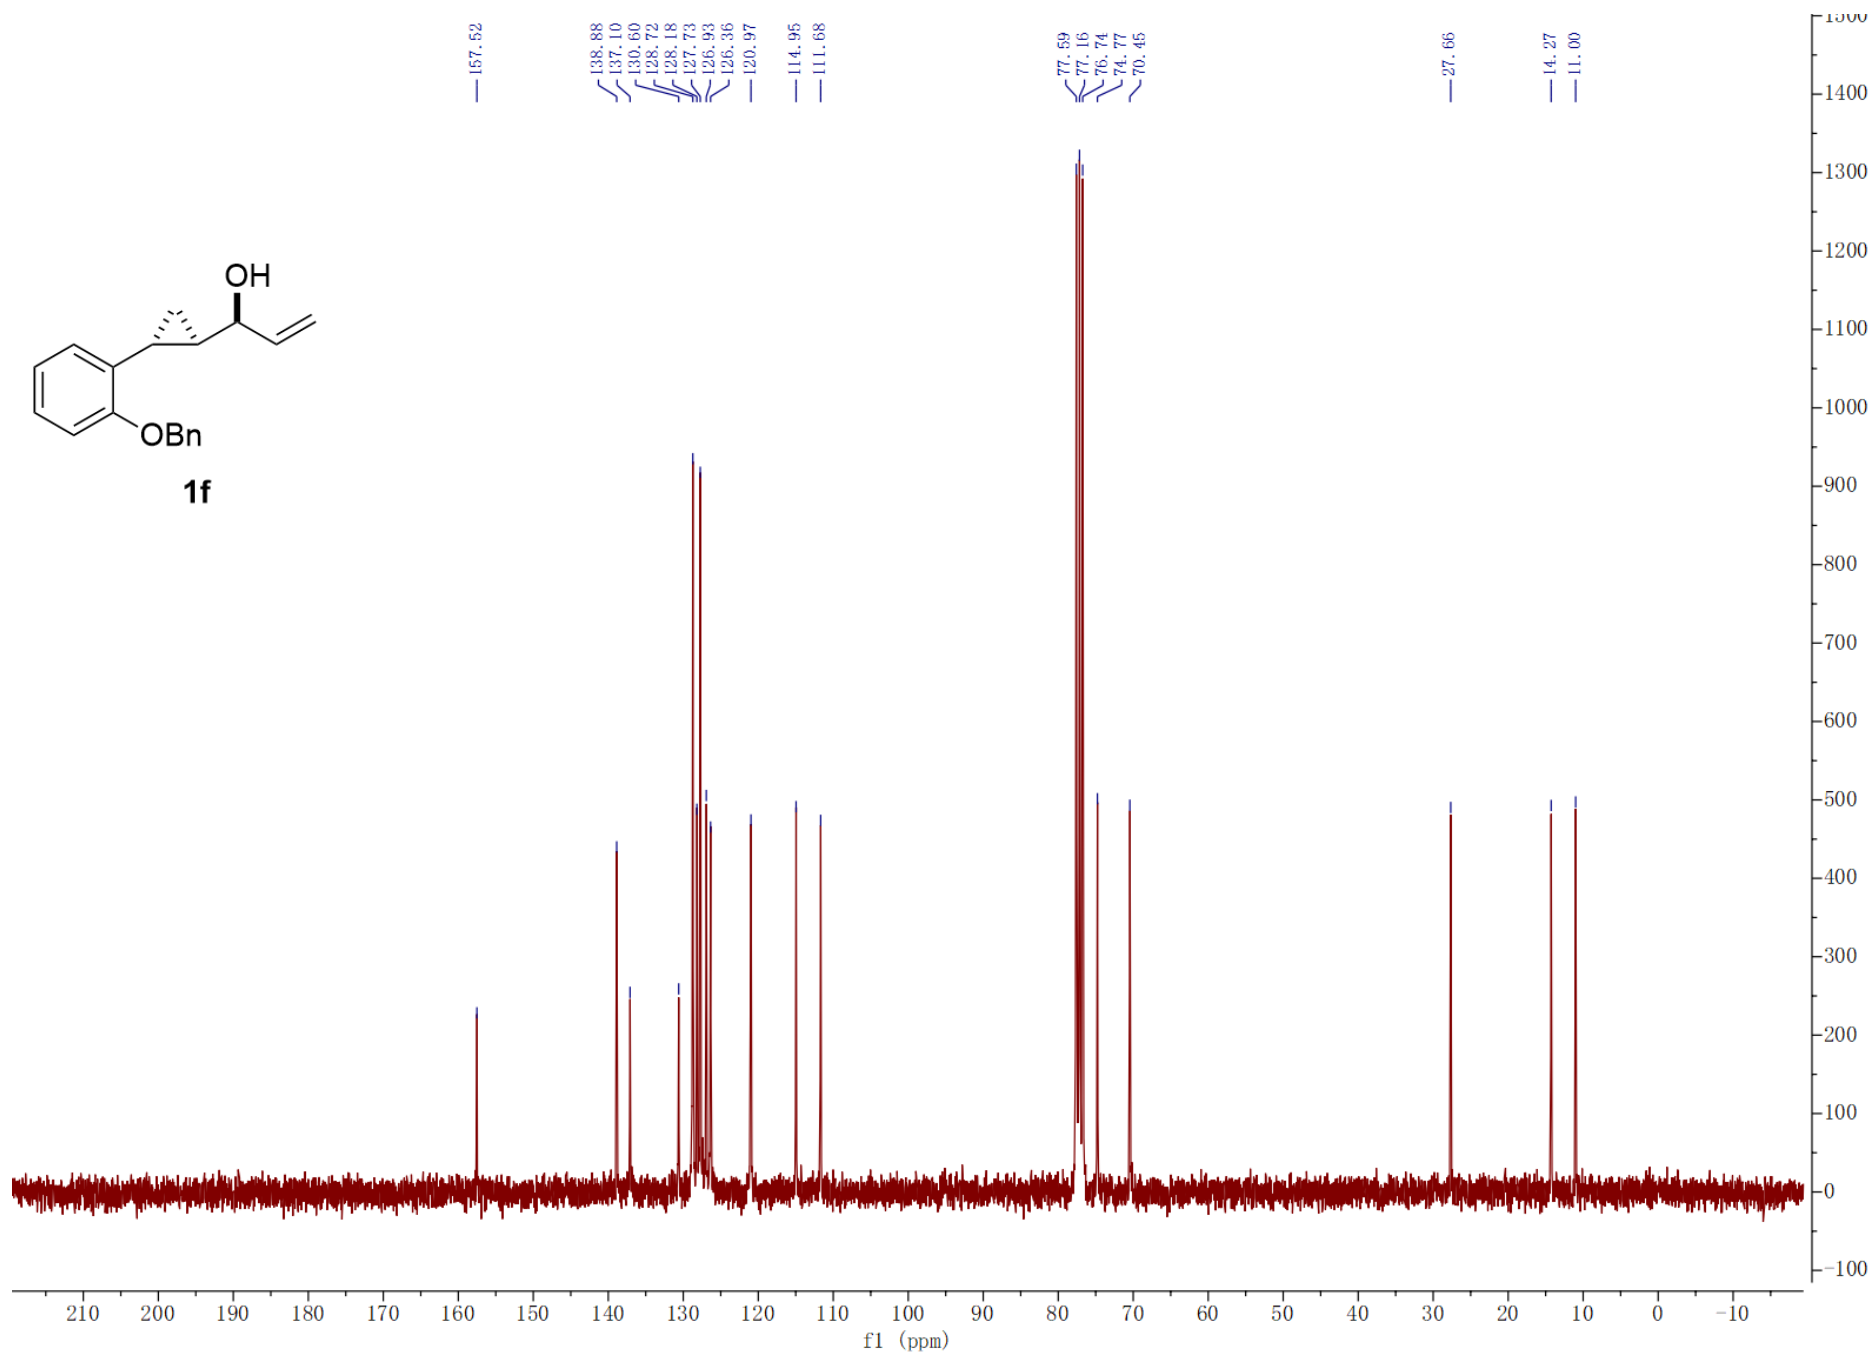

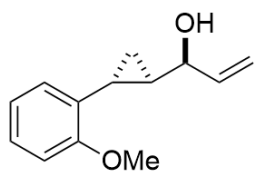

**1g**

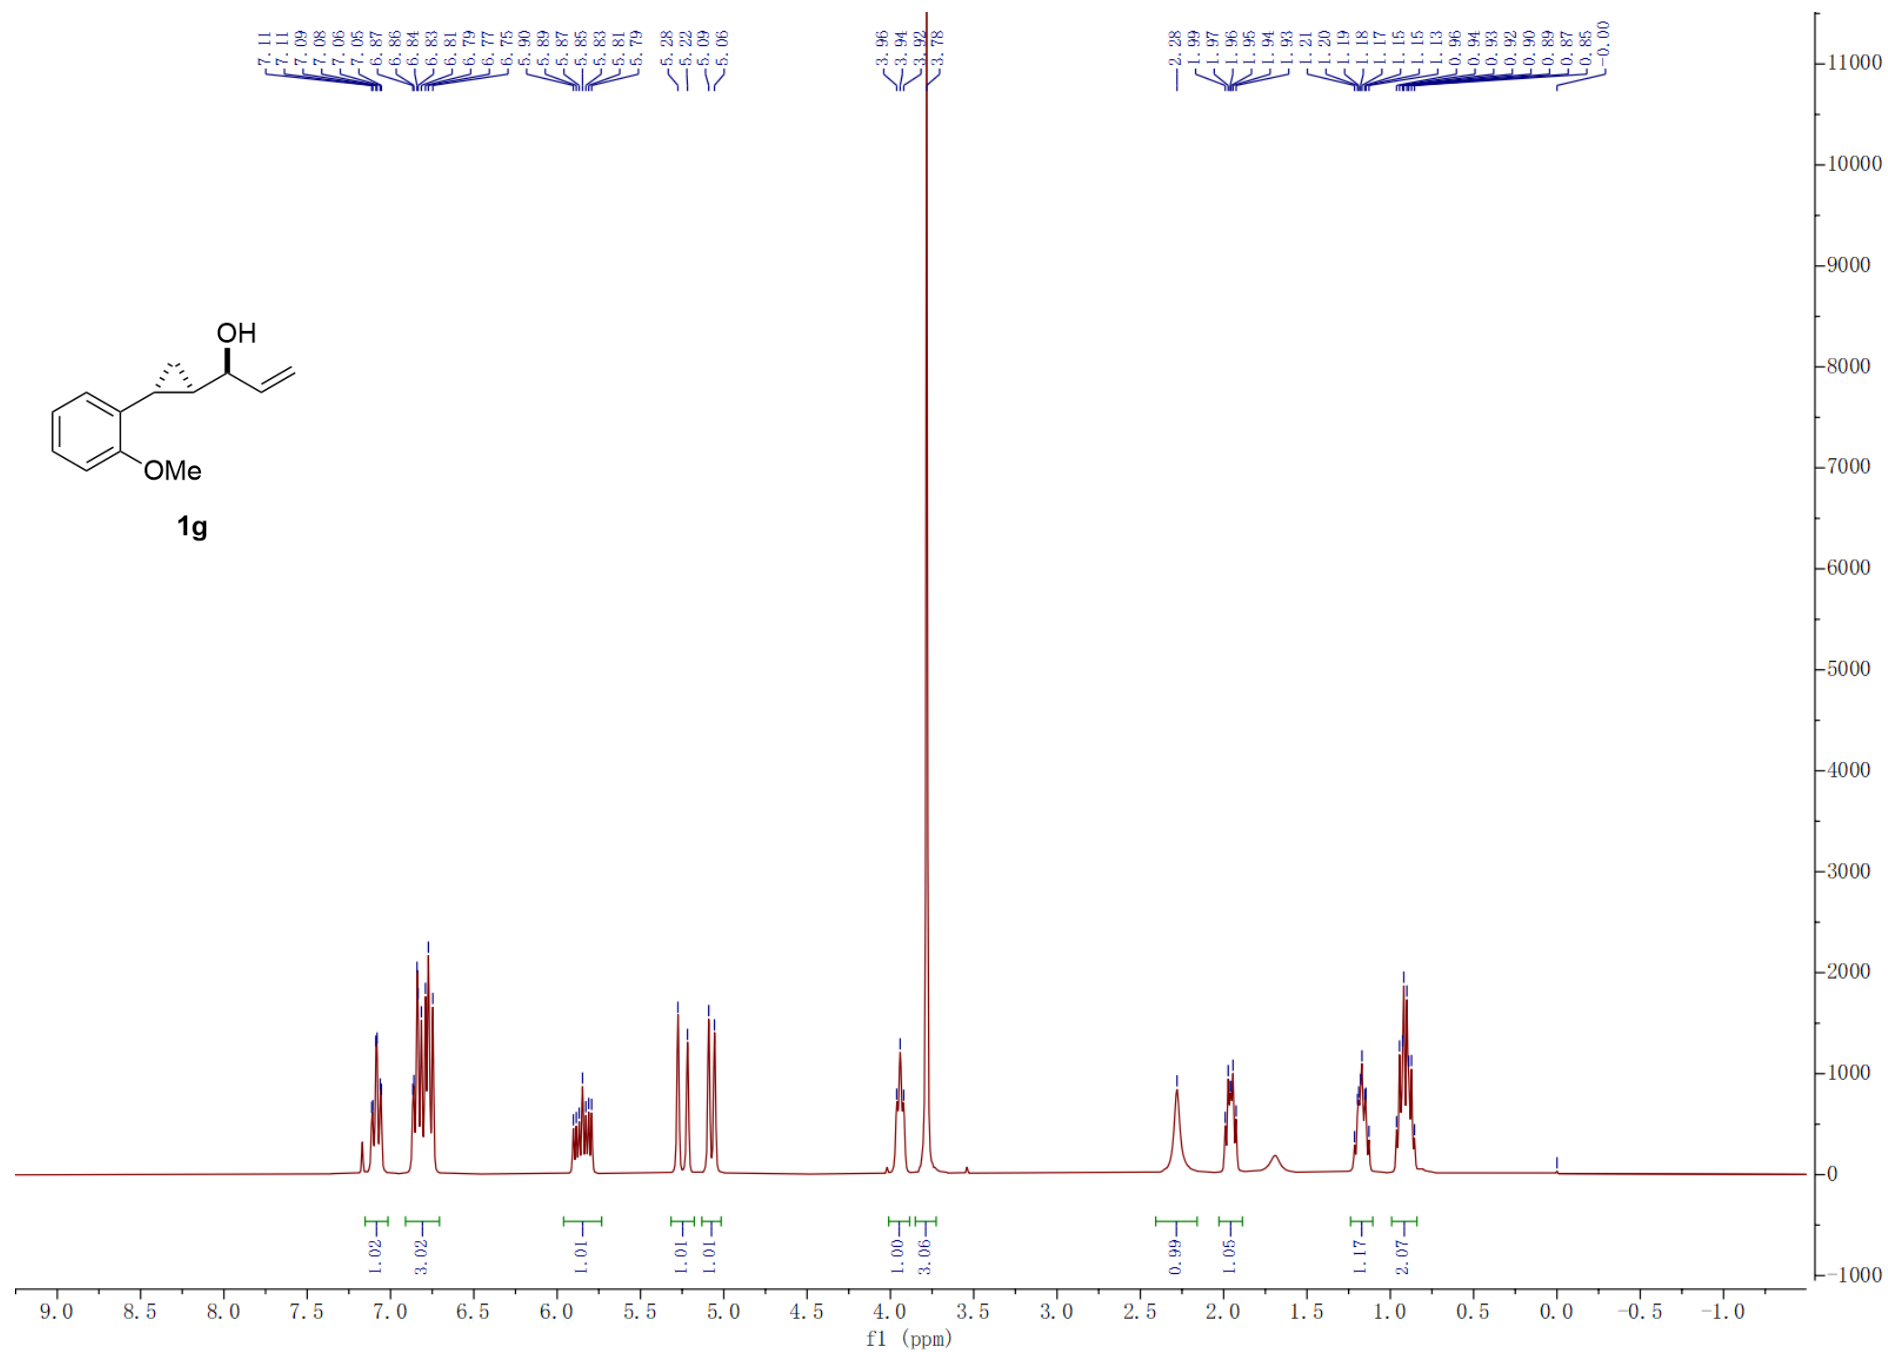

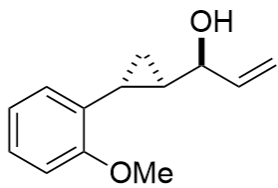

**1g**

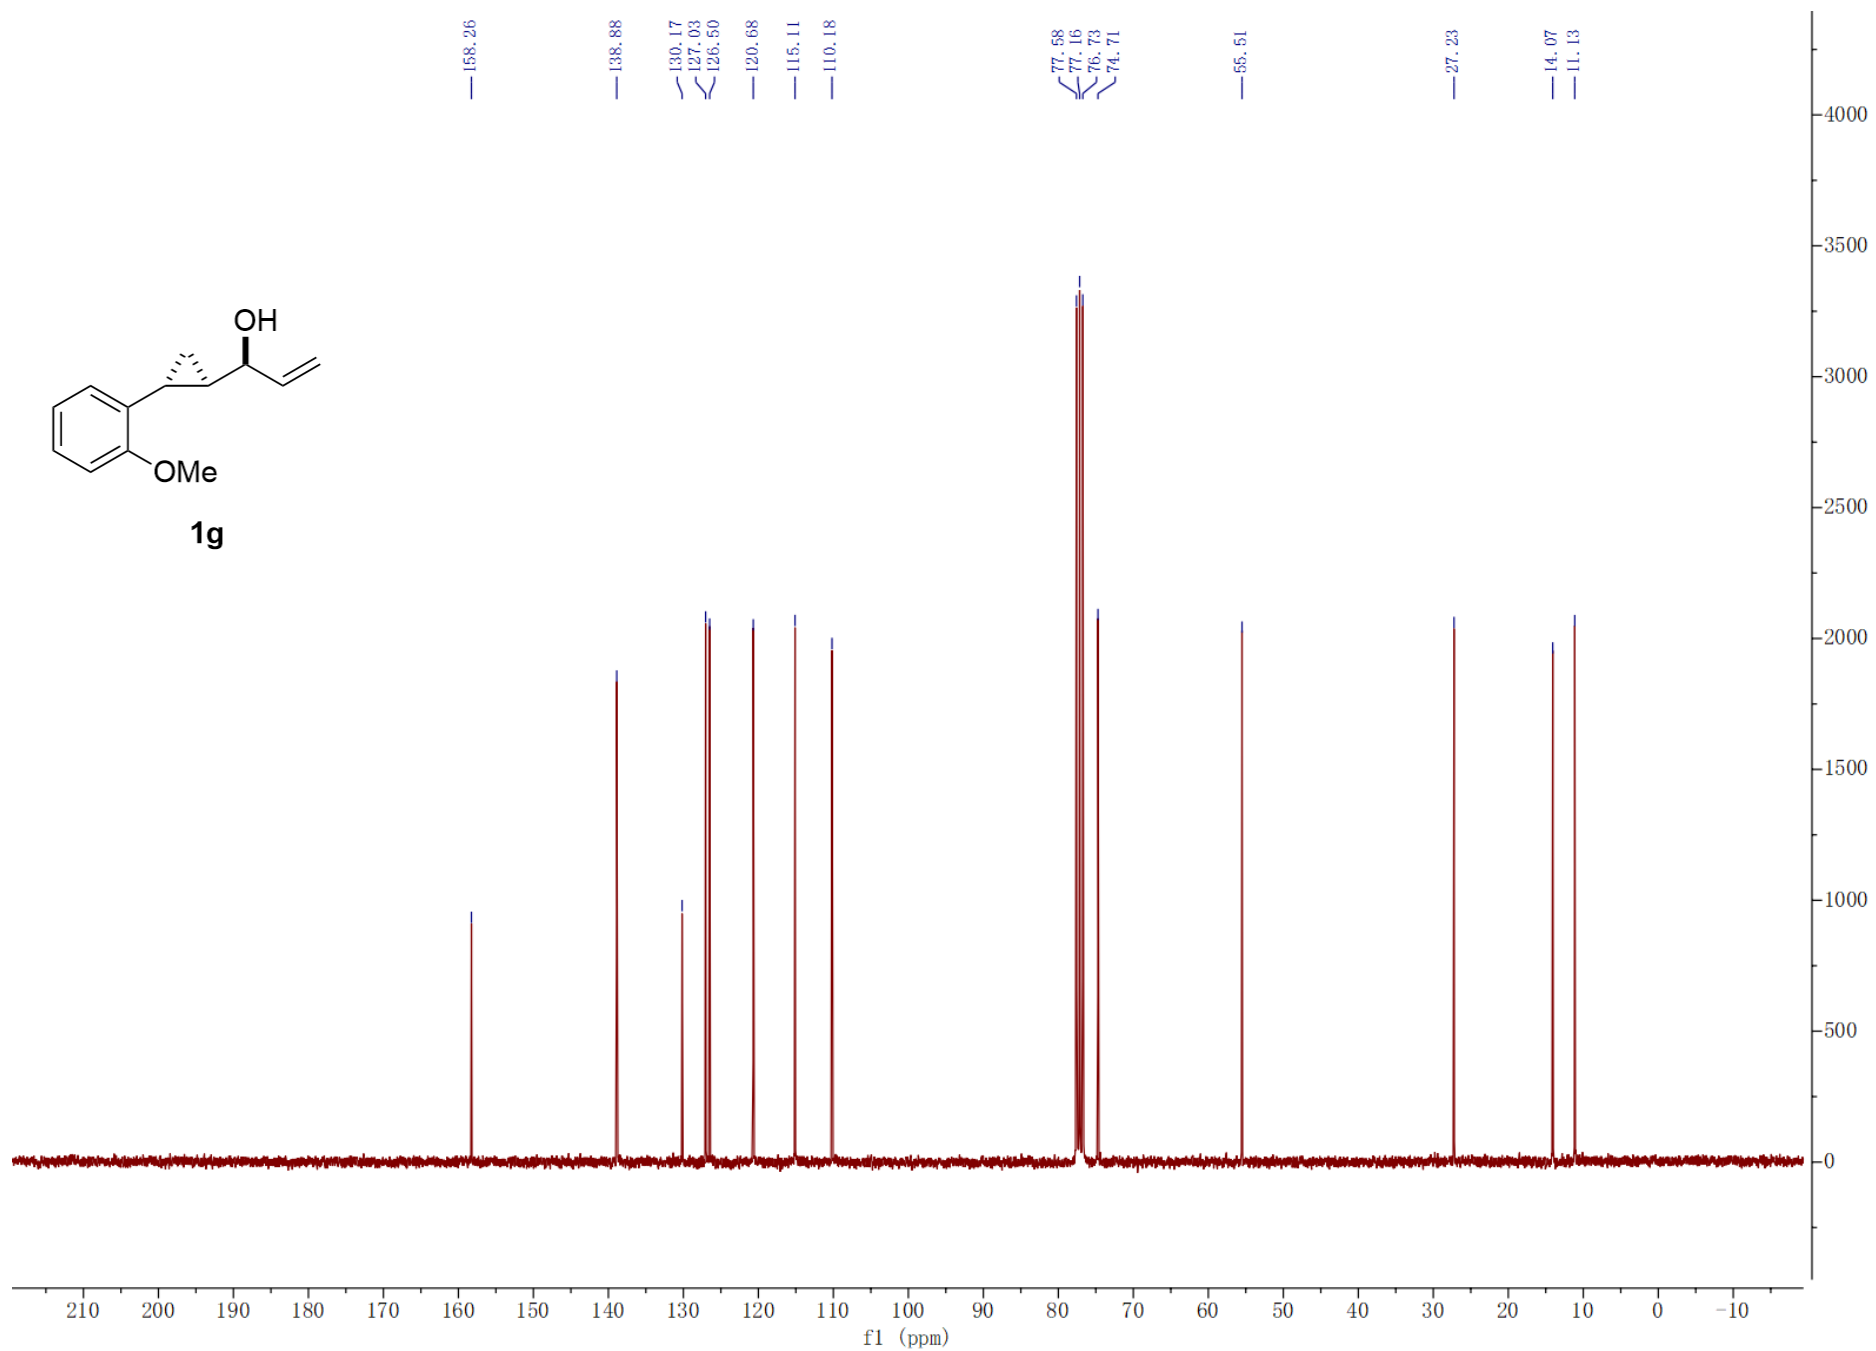

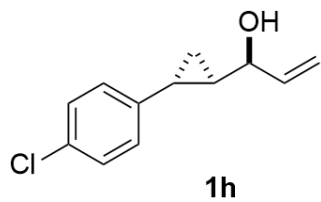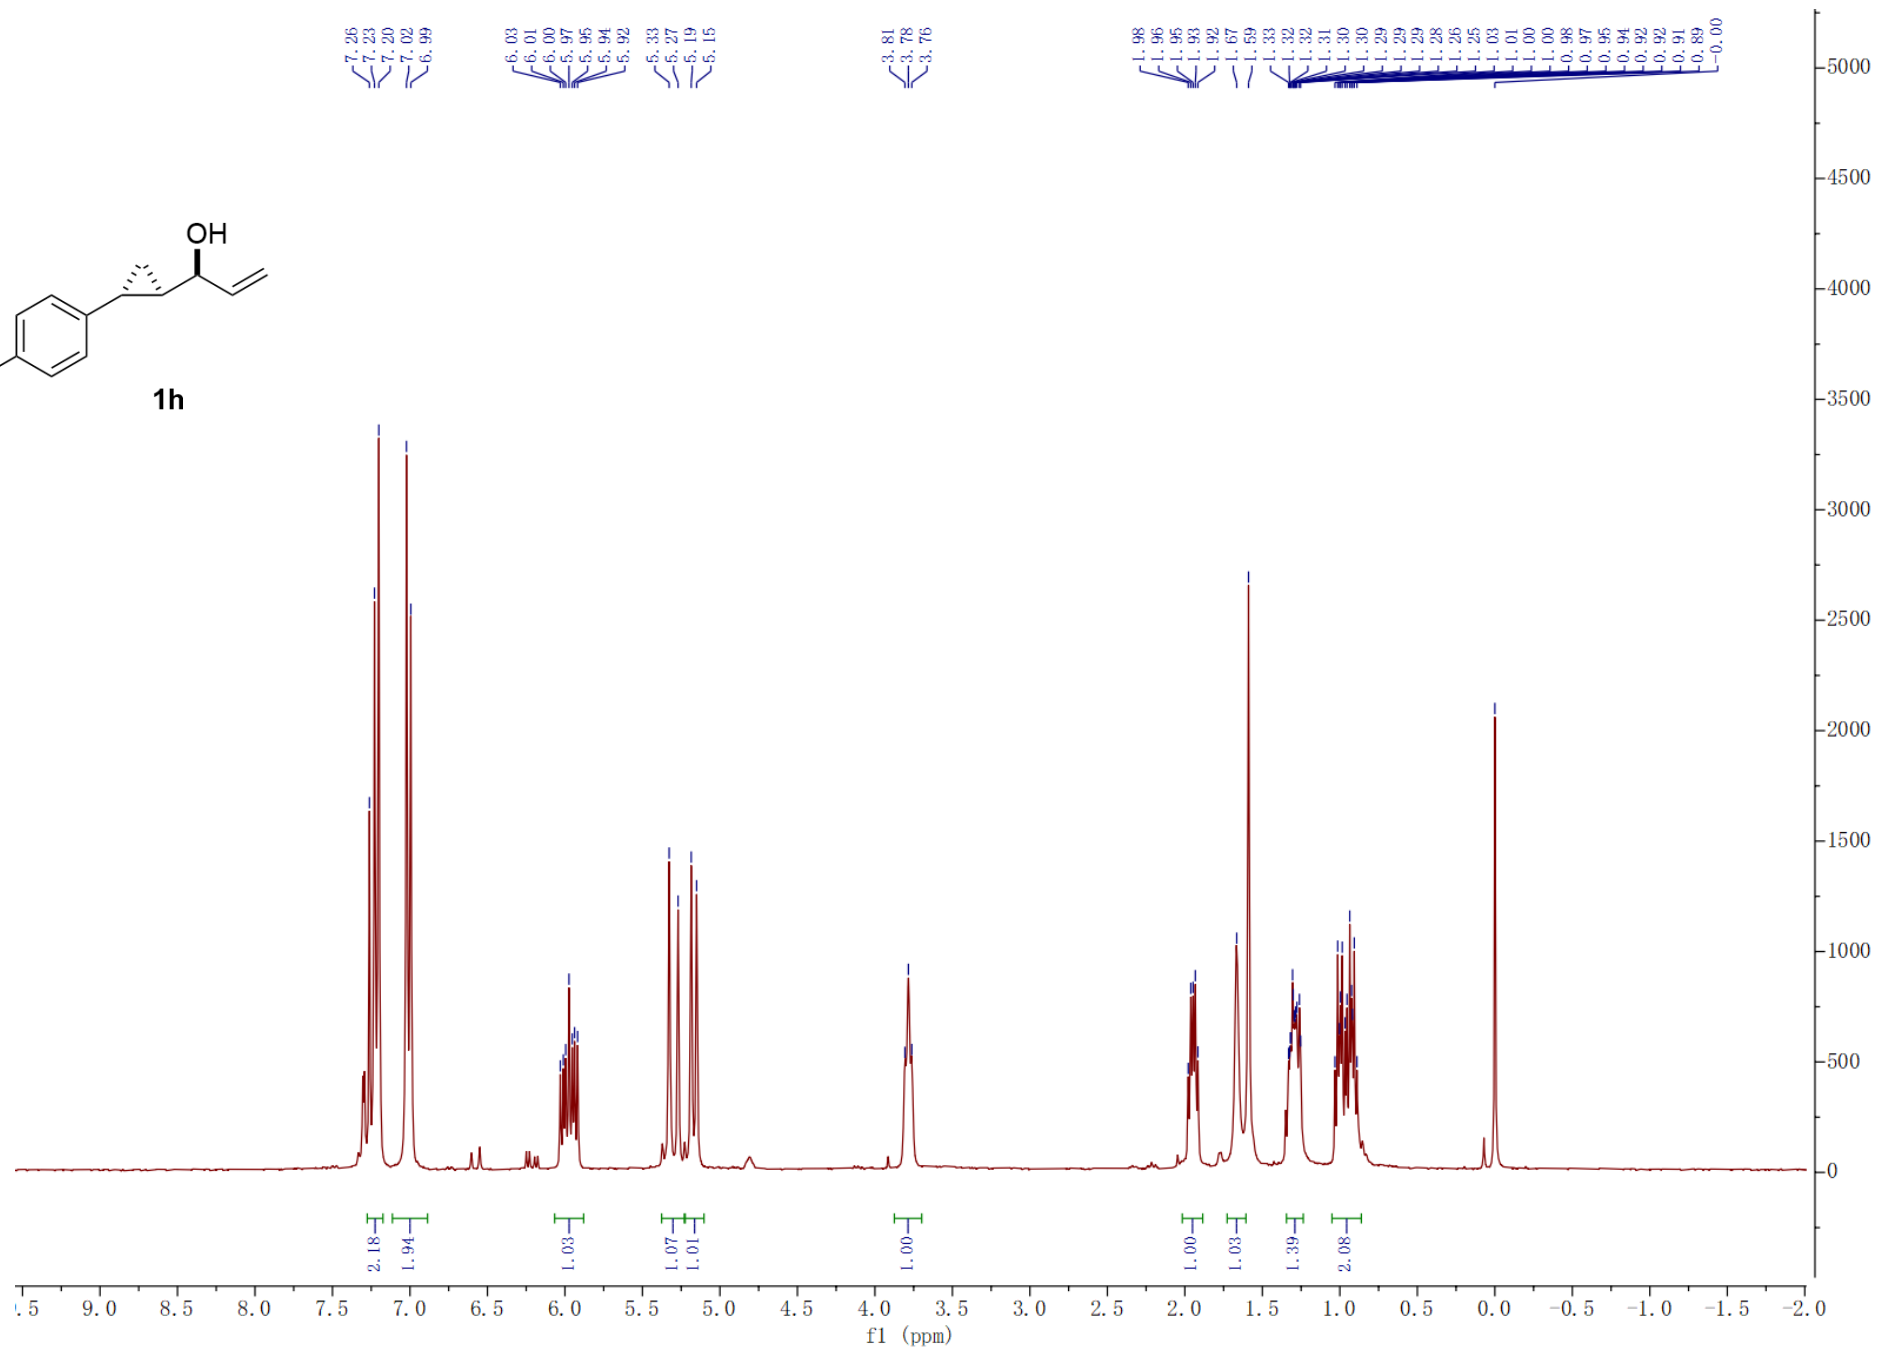



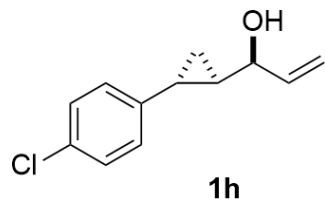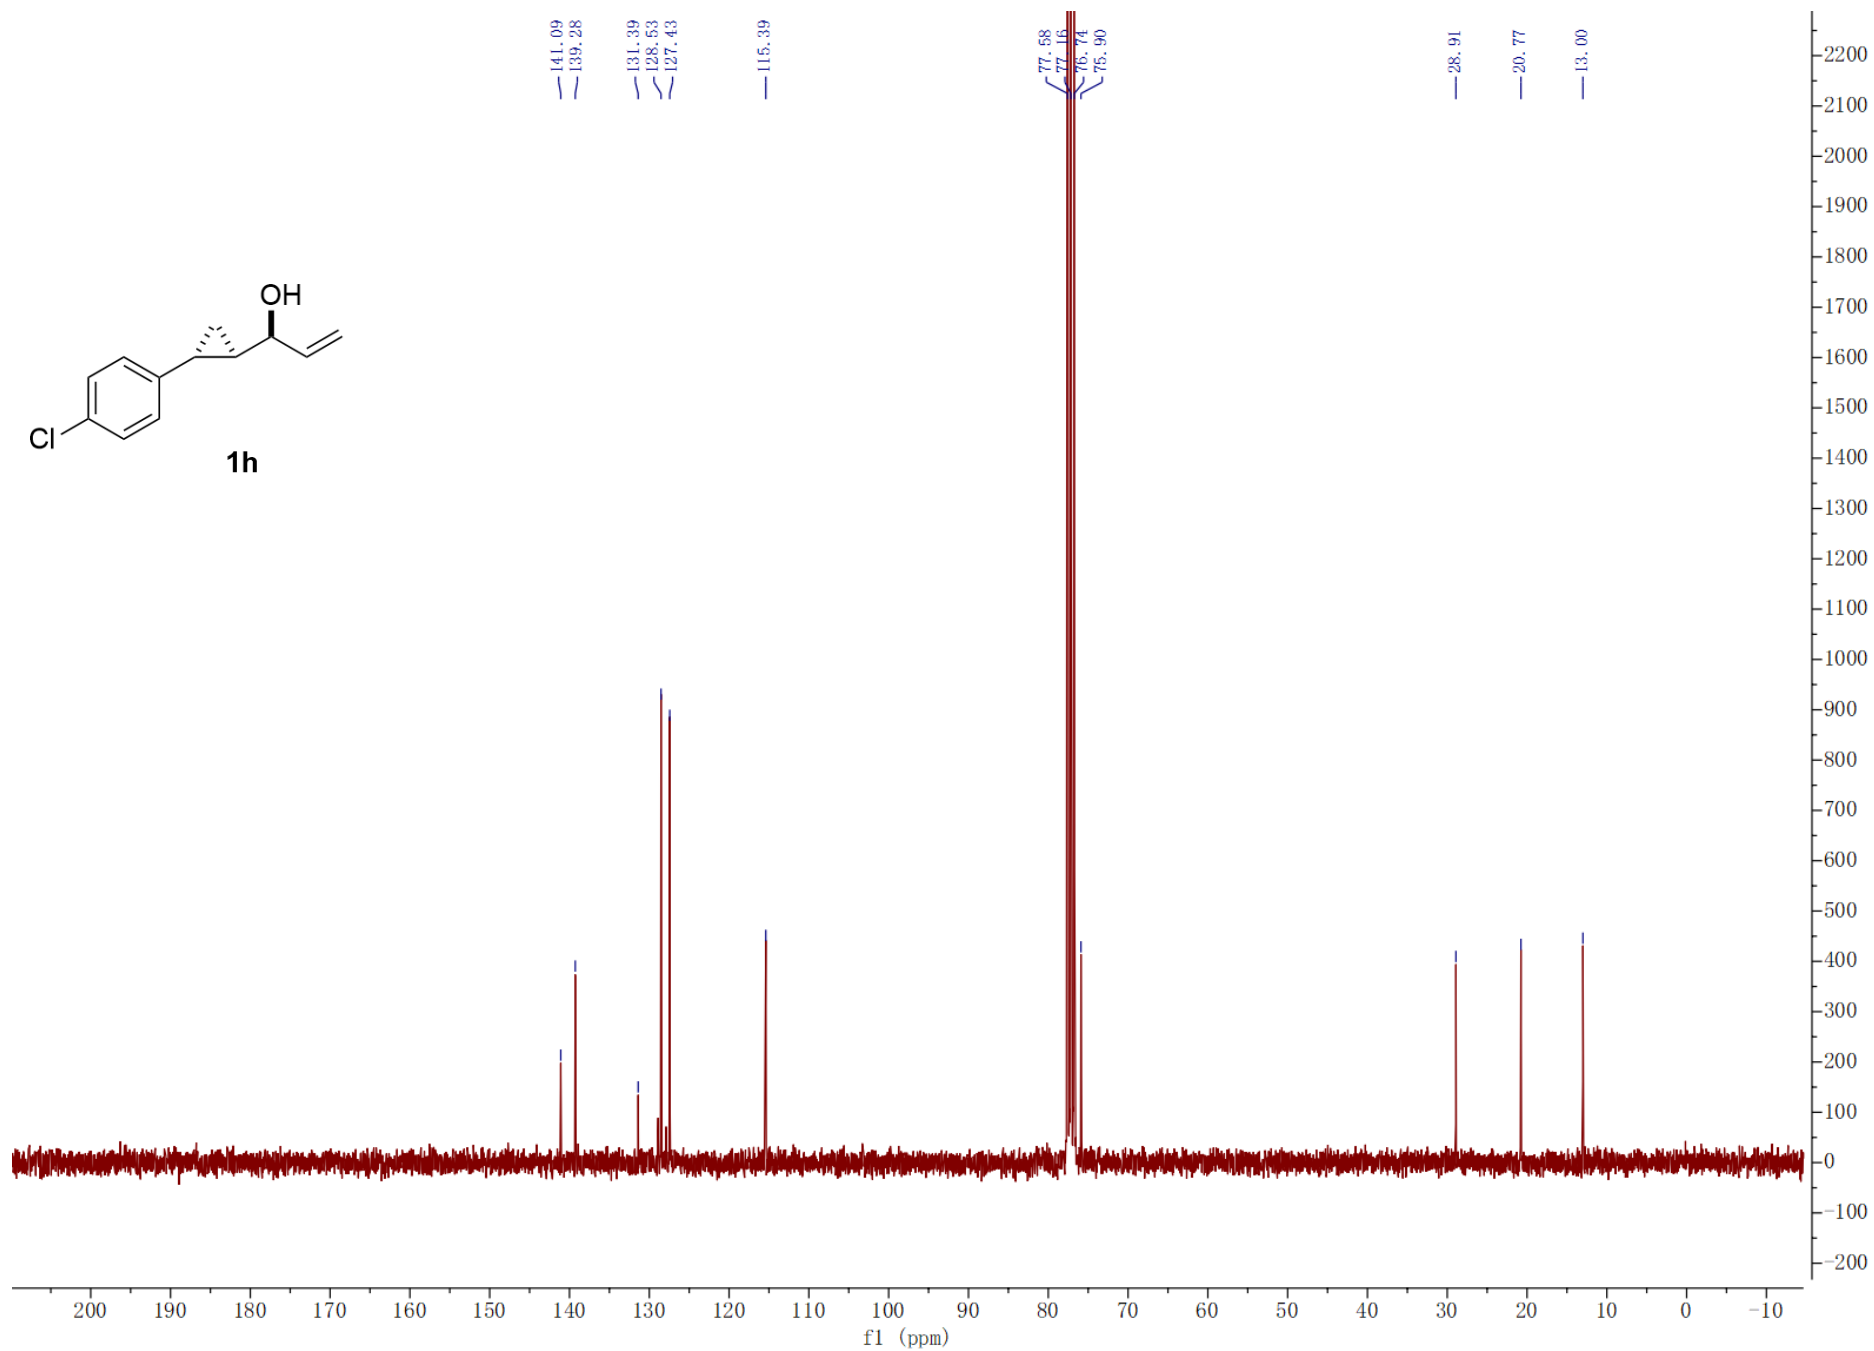

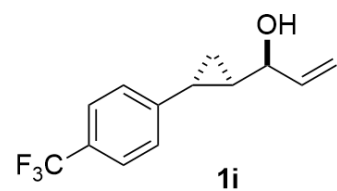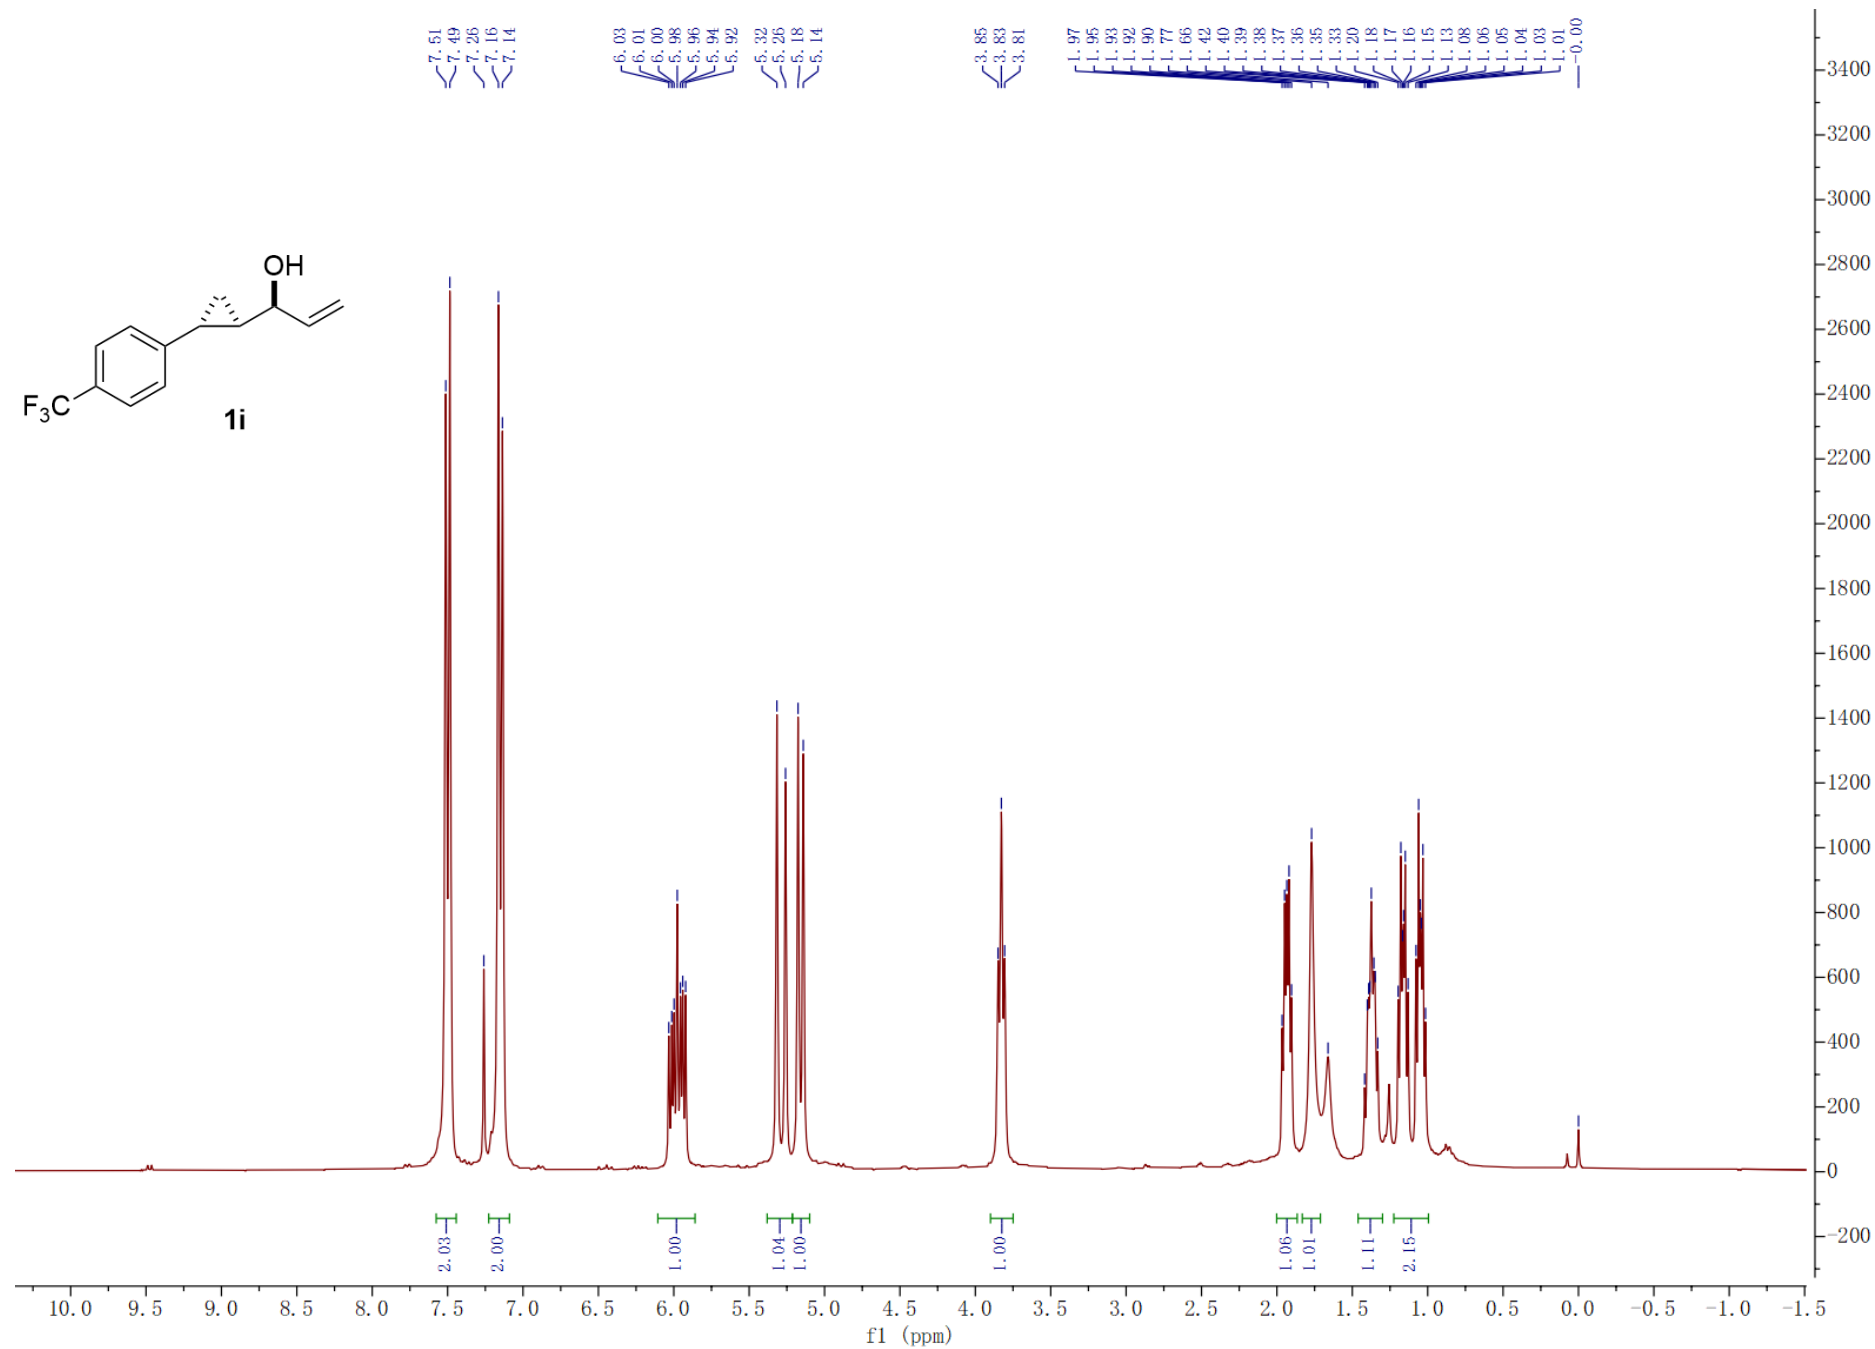

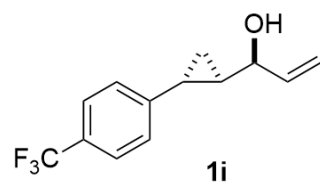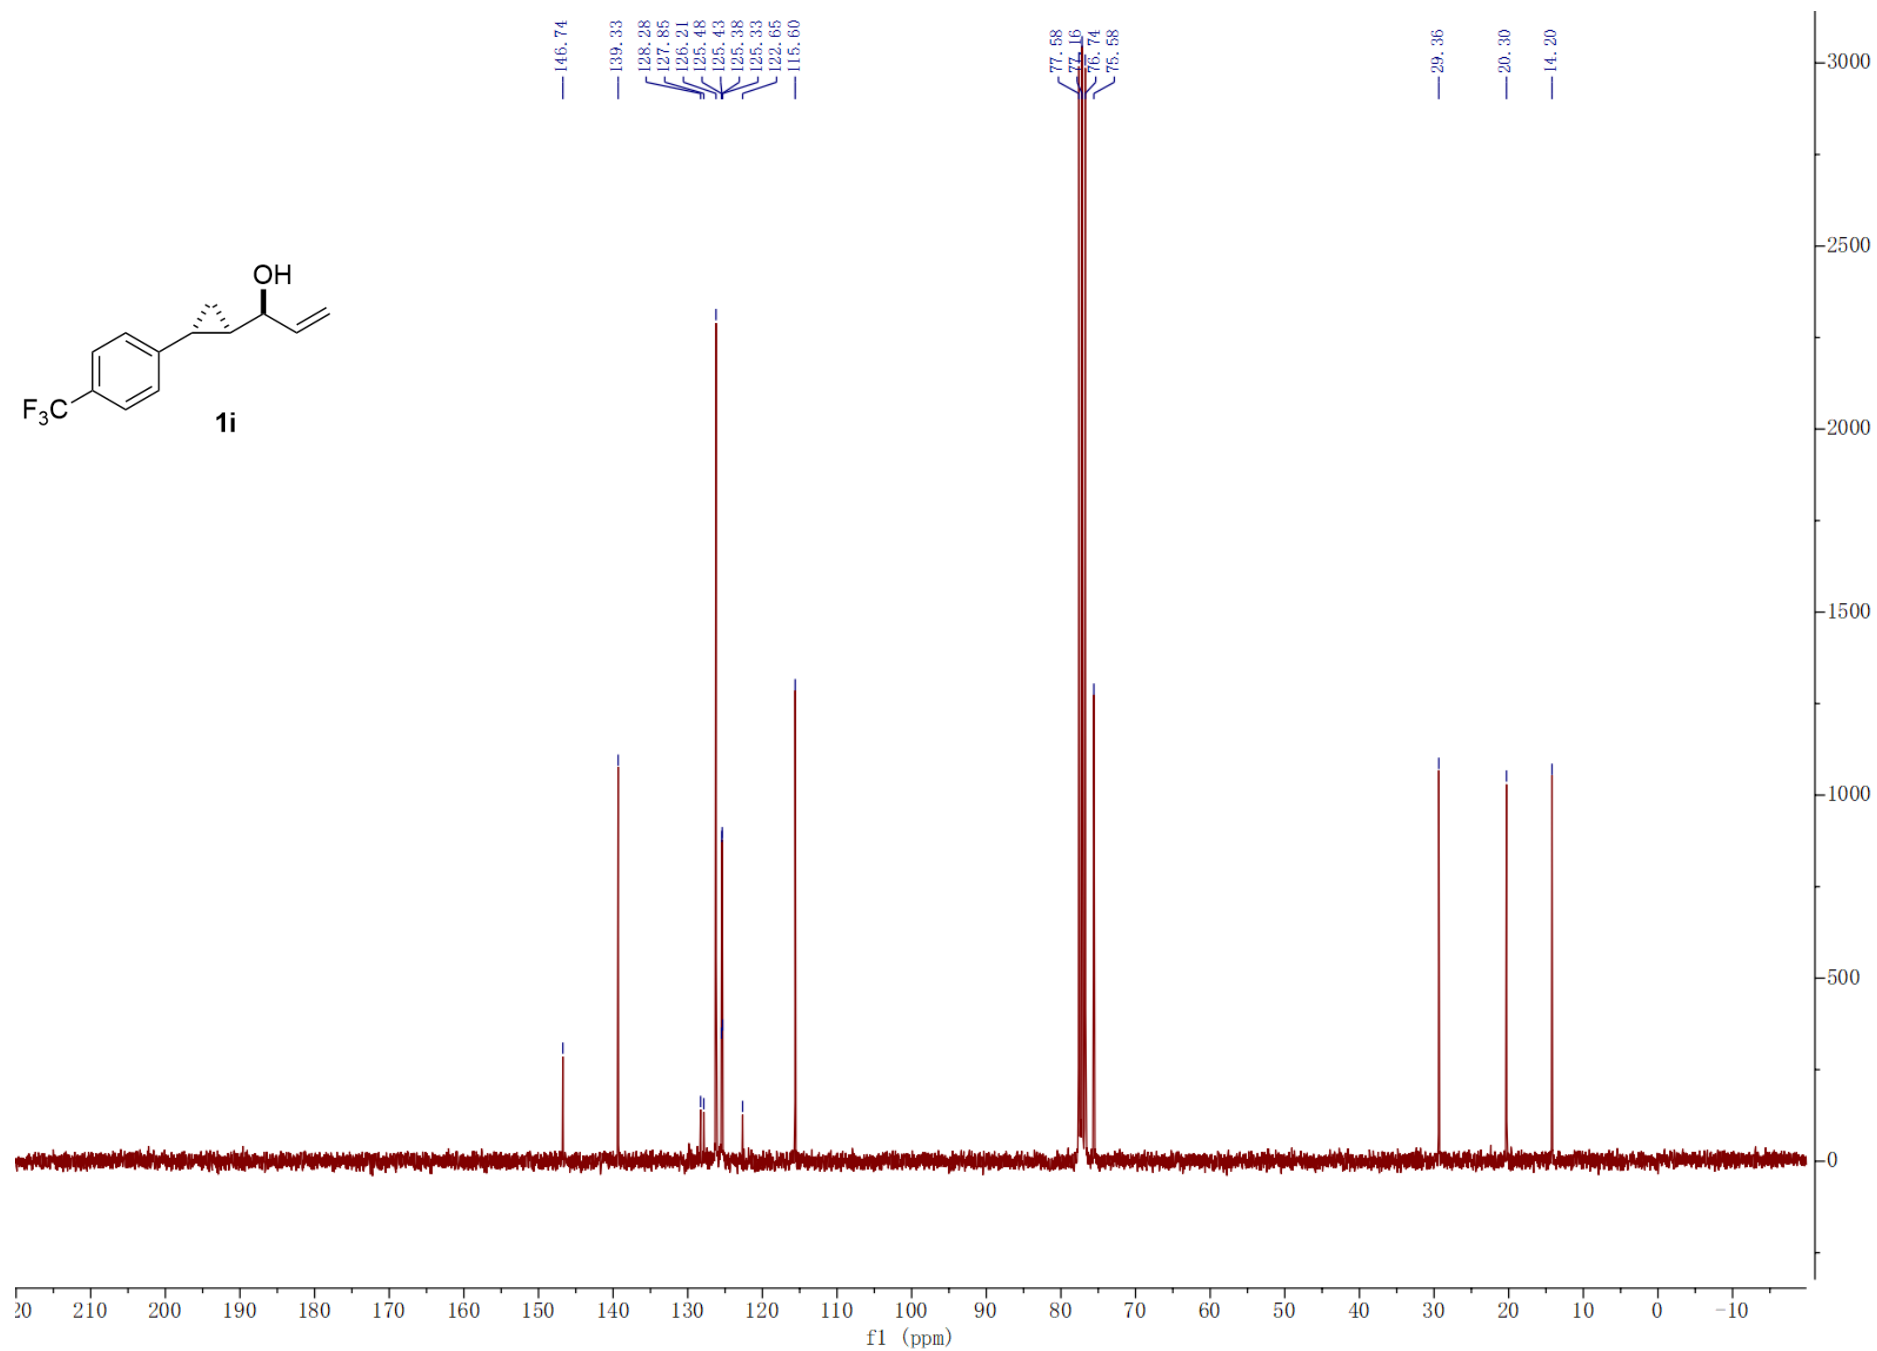

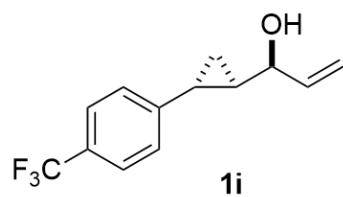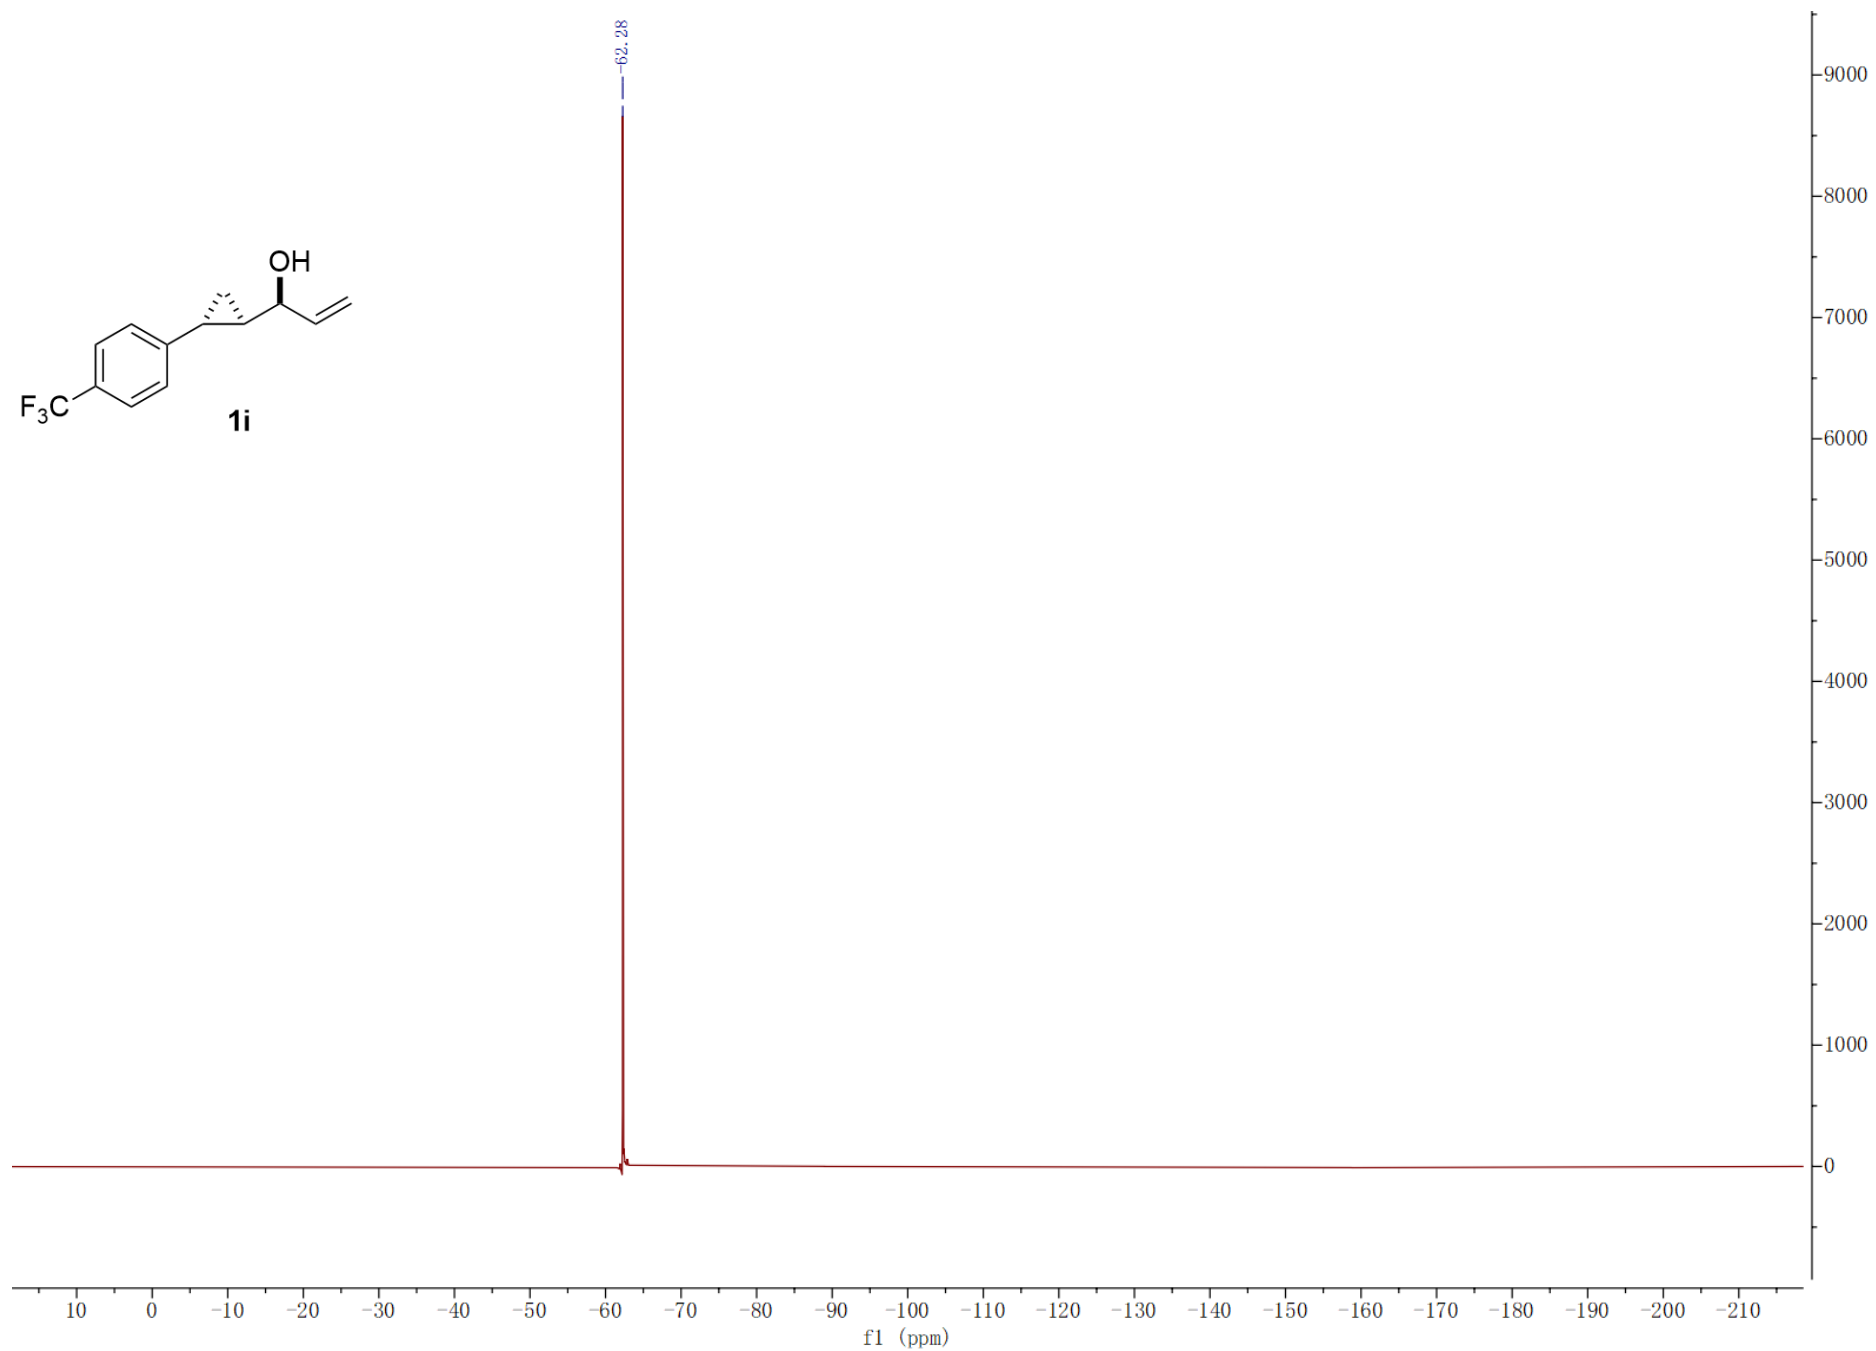

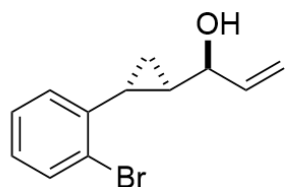

1j

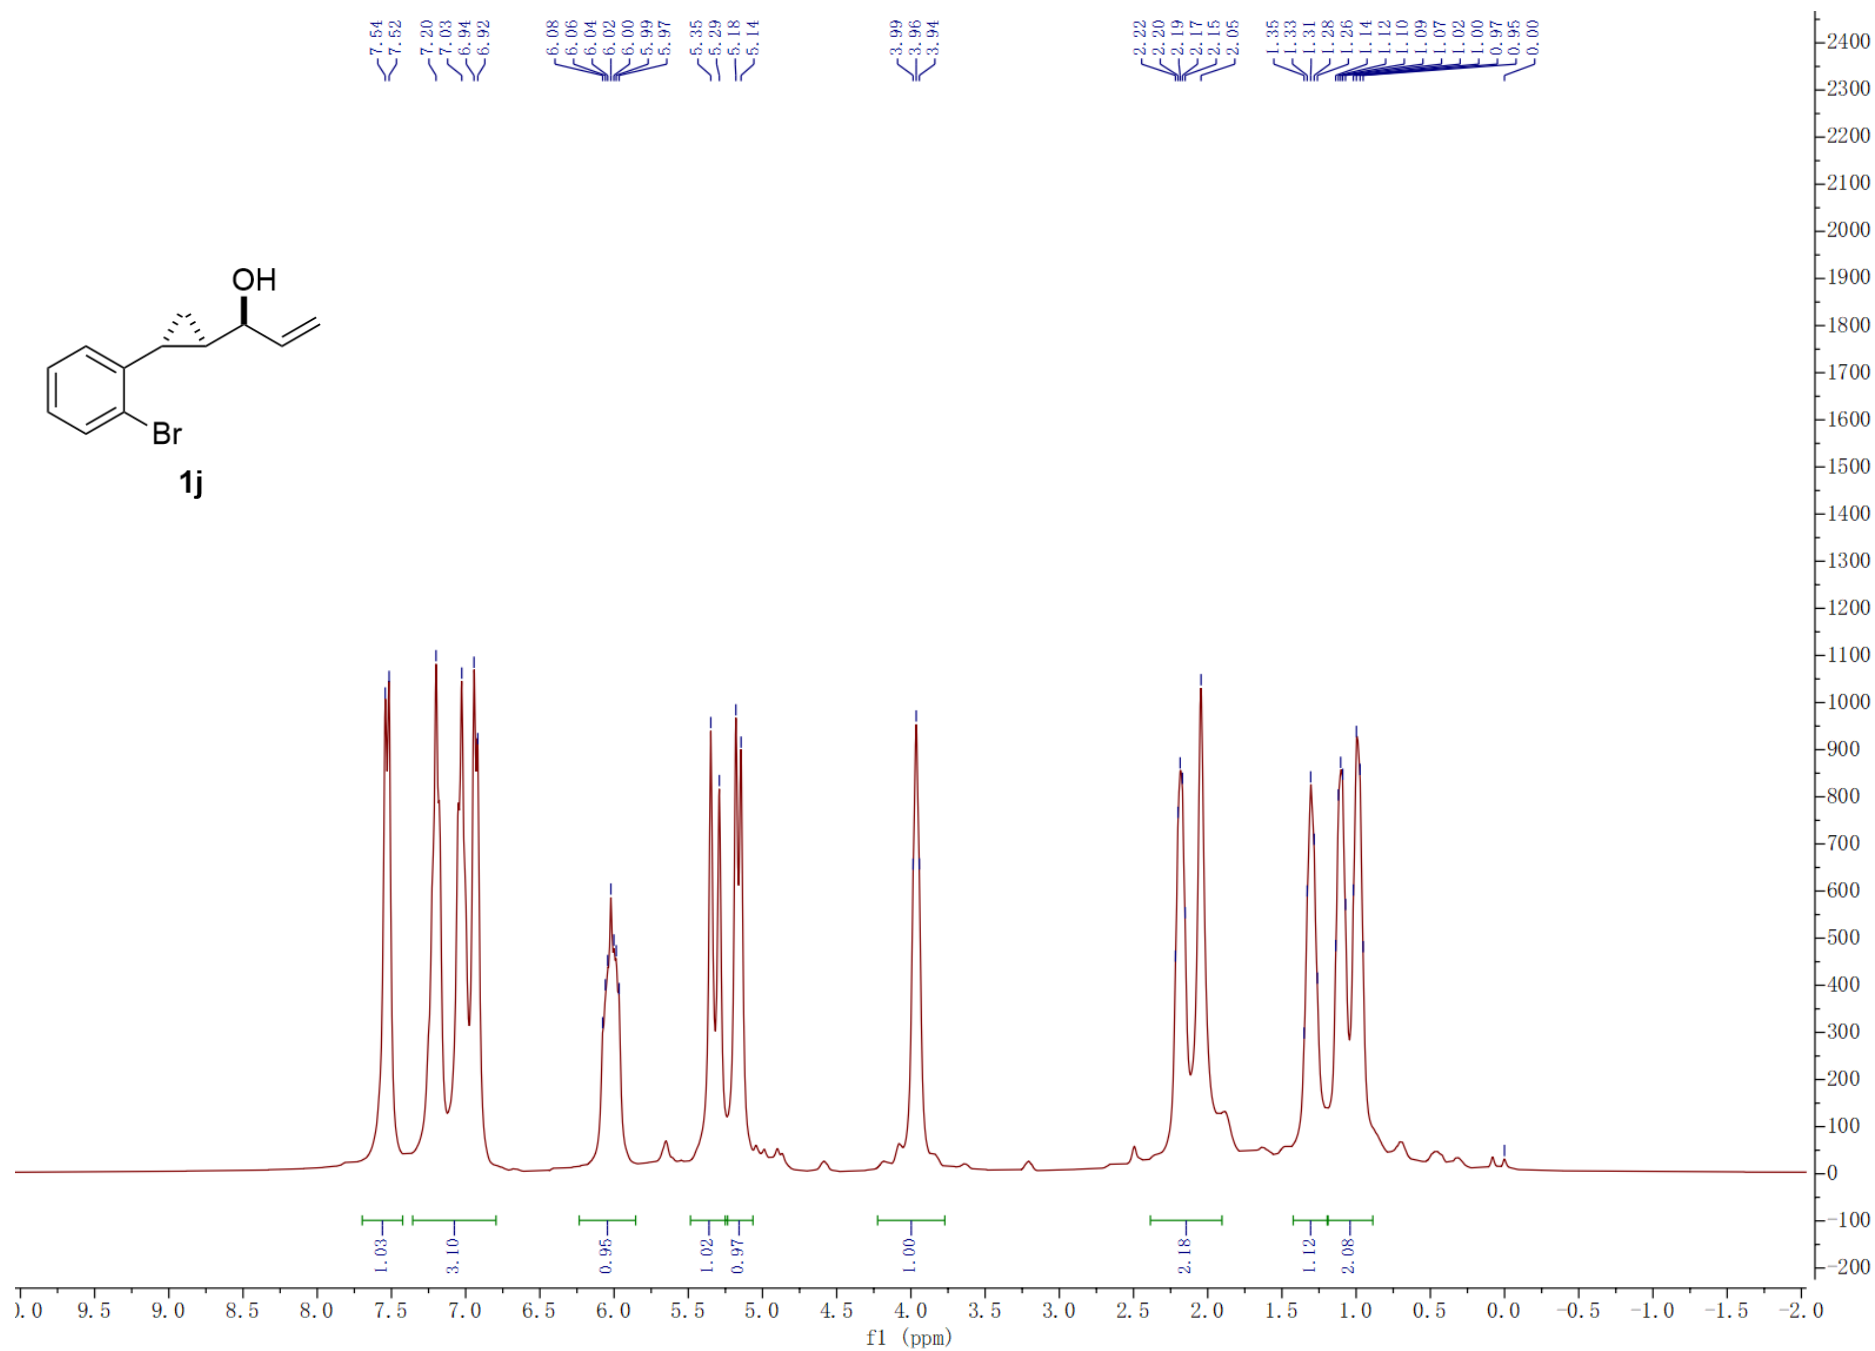

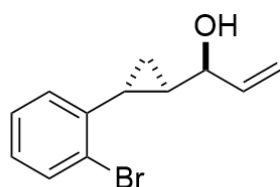

**1j**

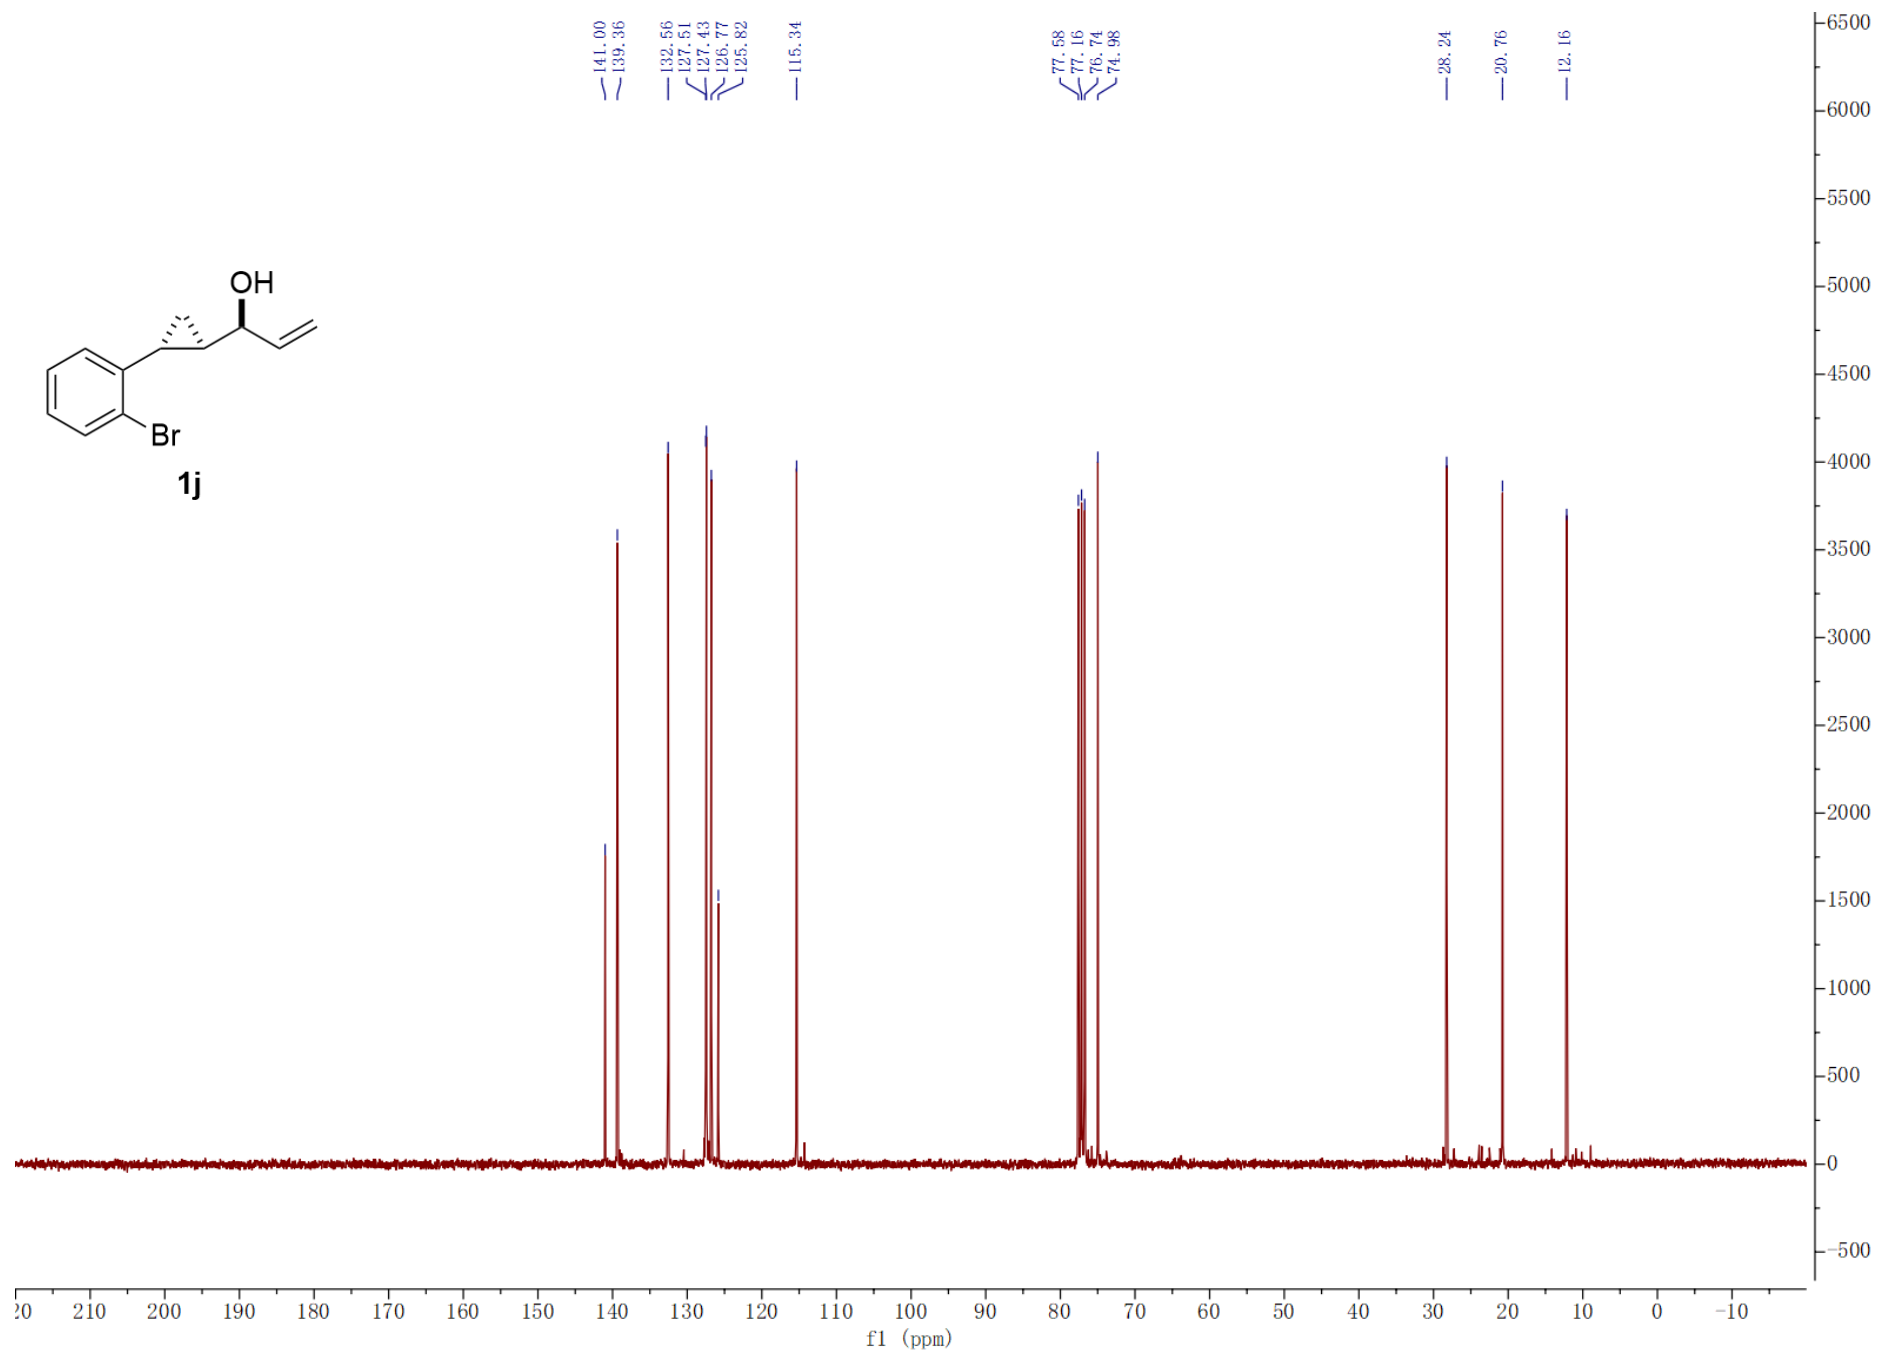

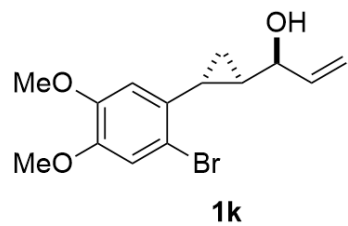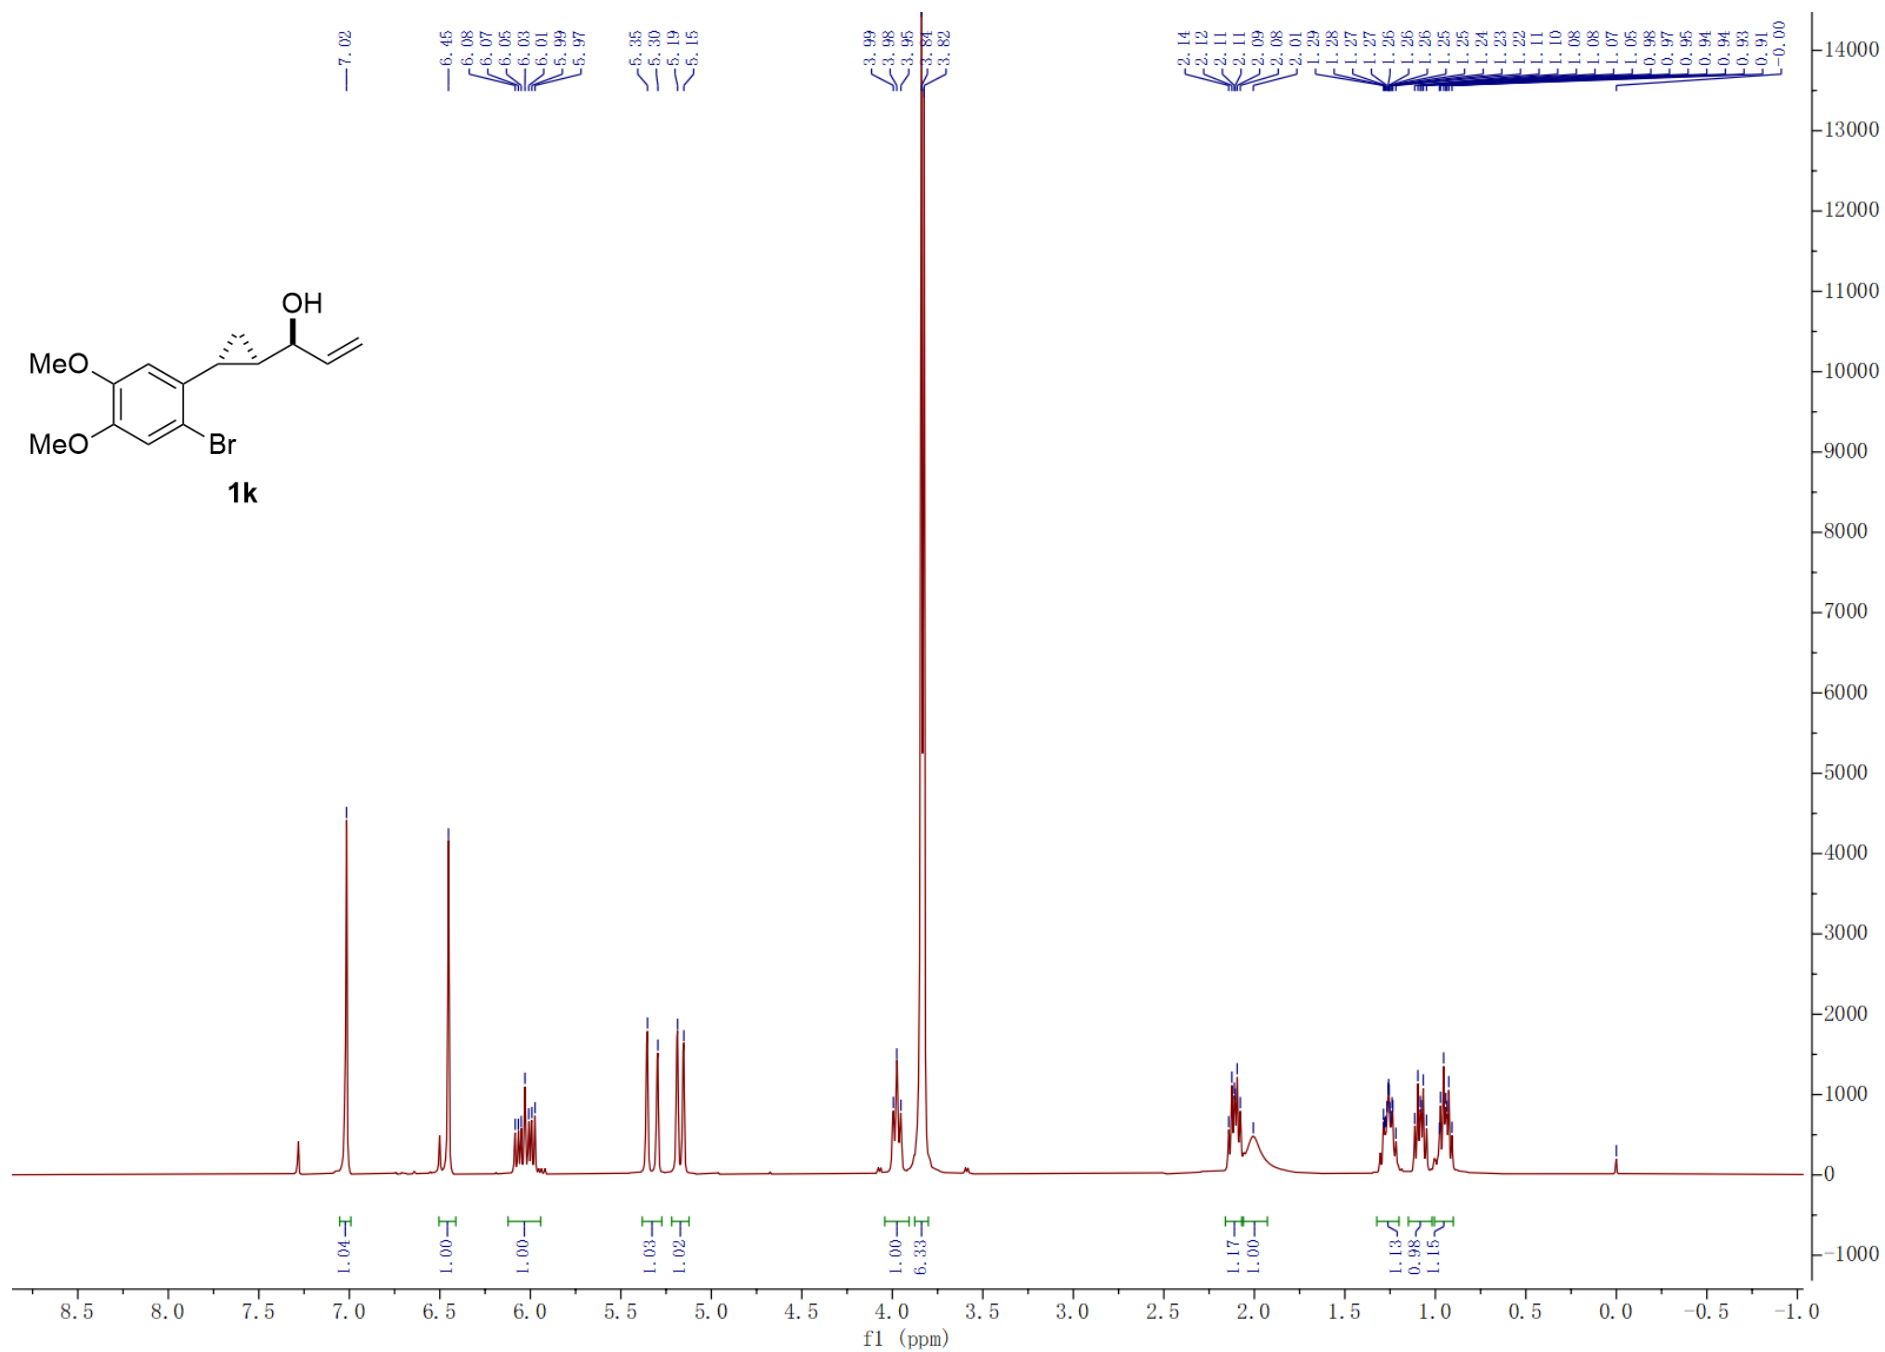

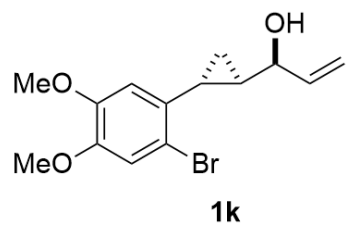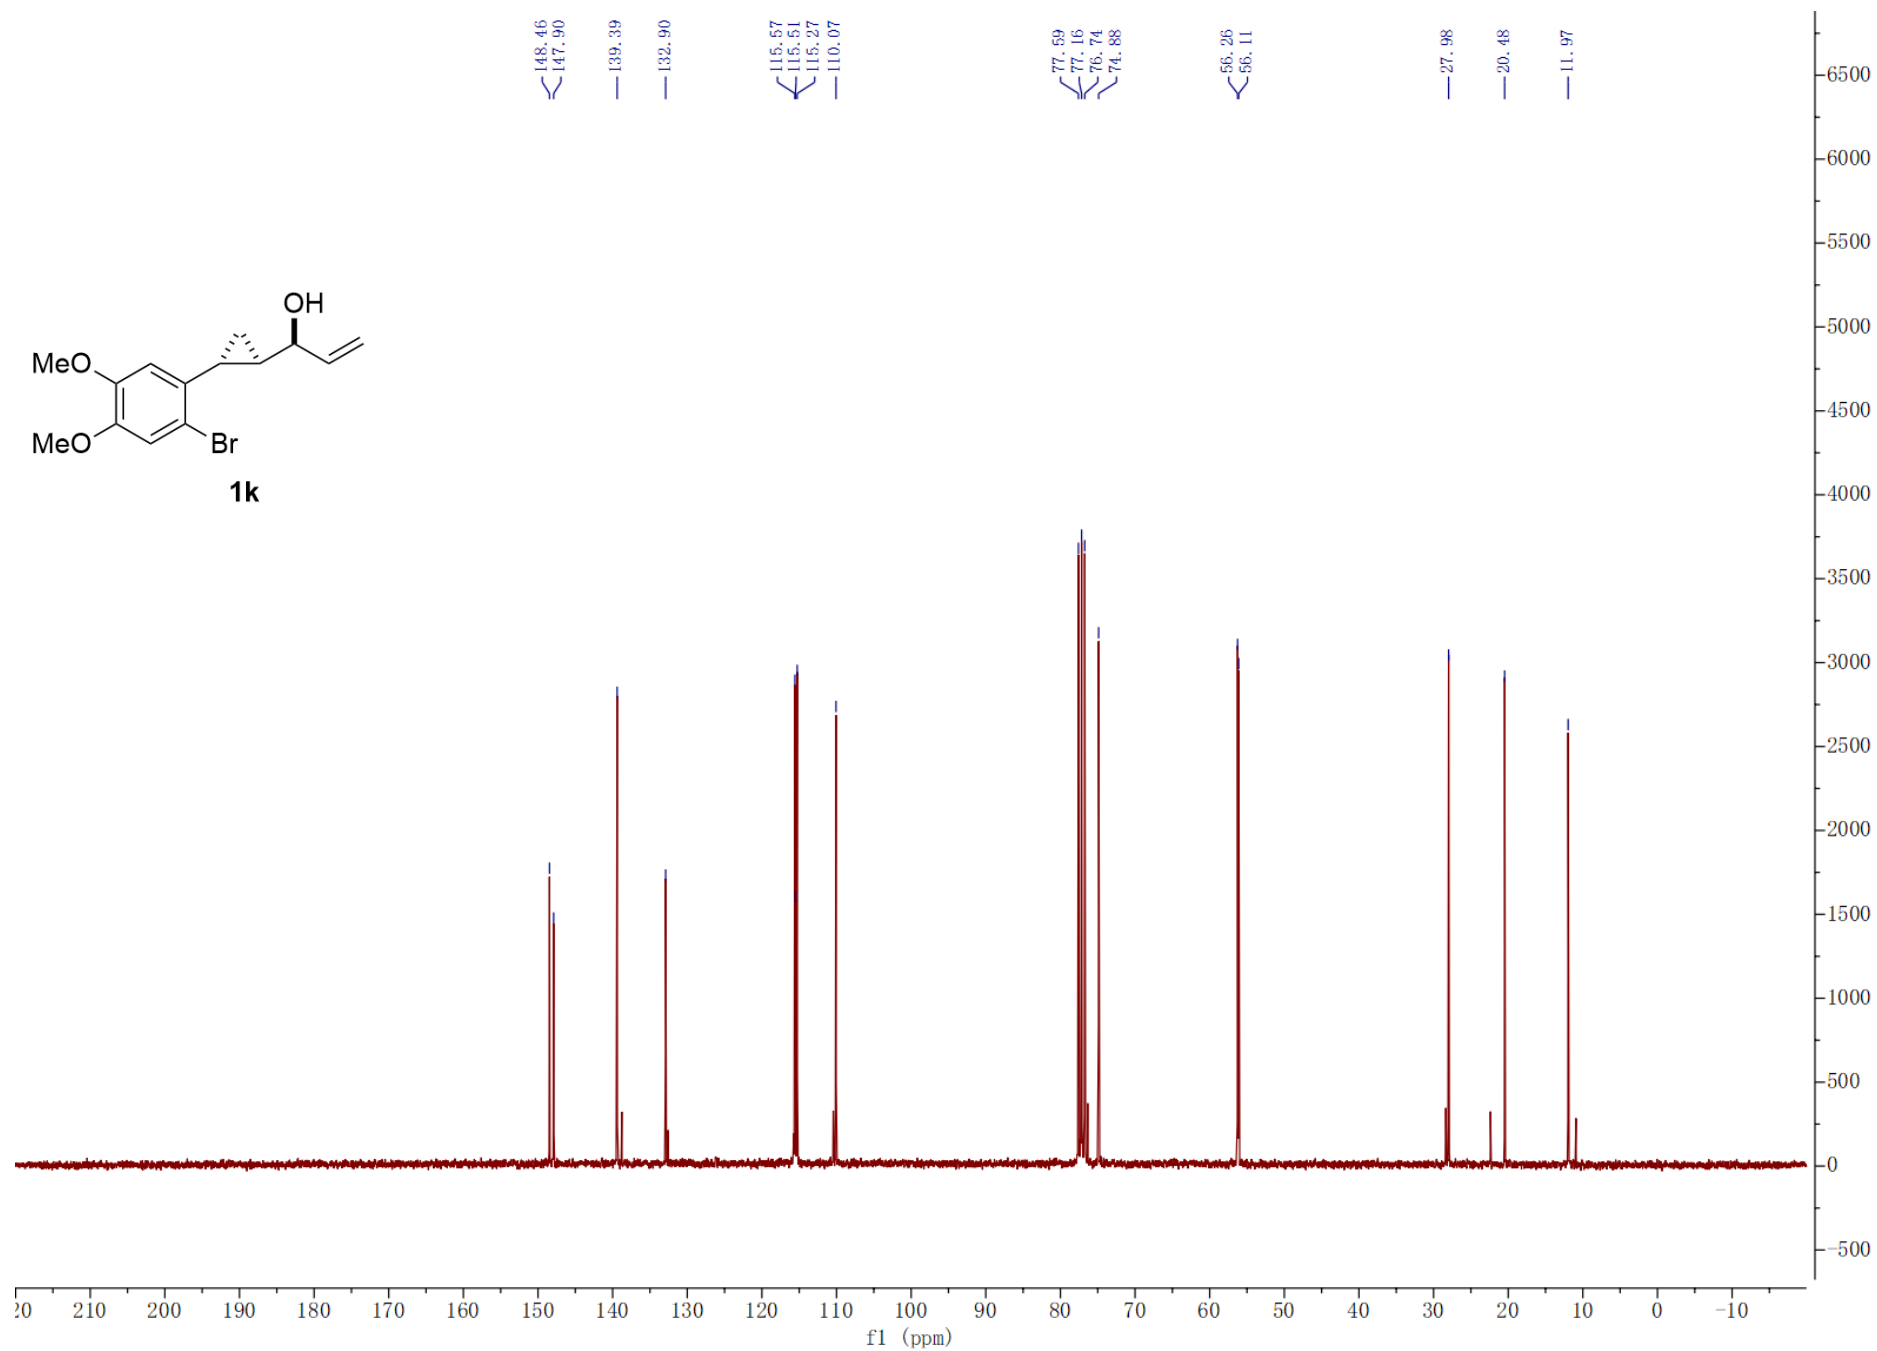



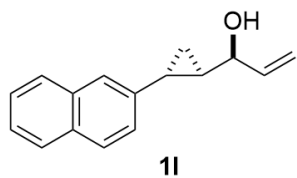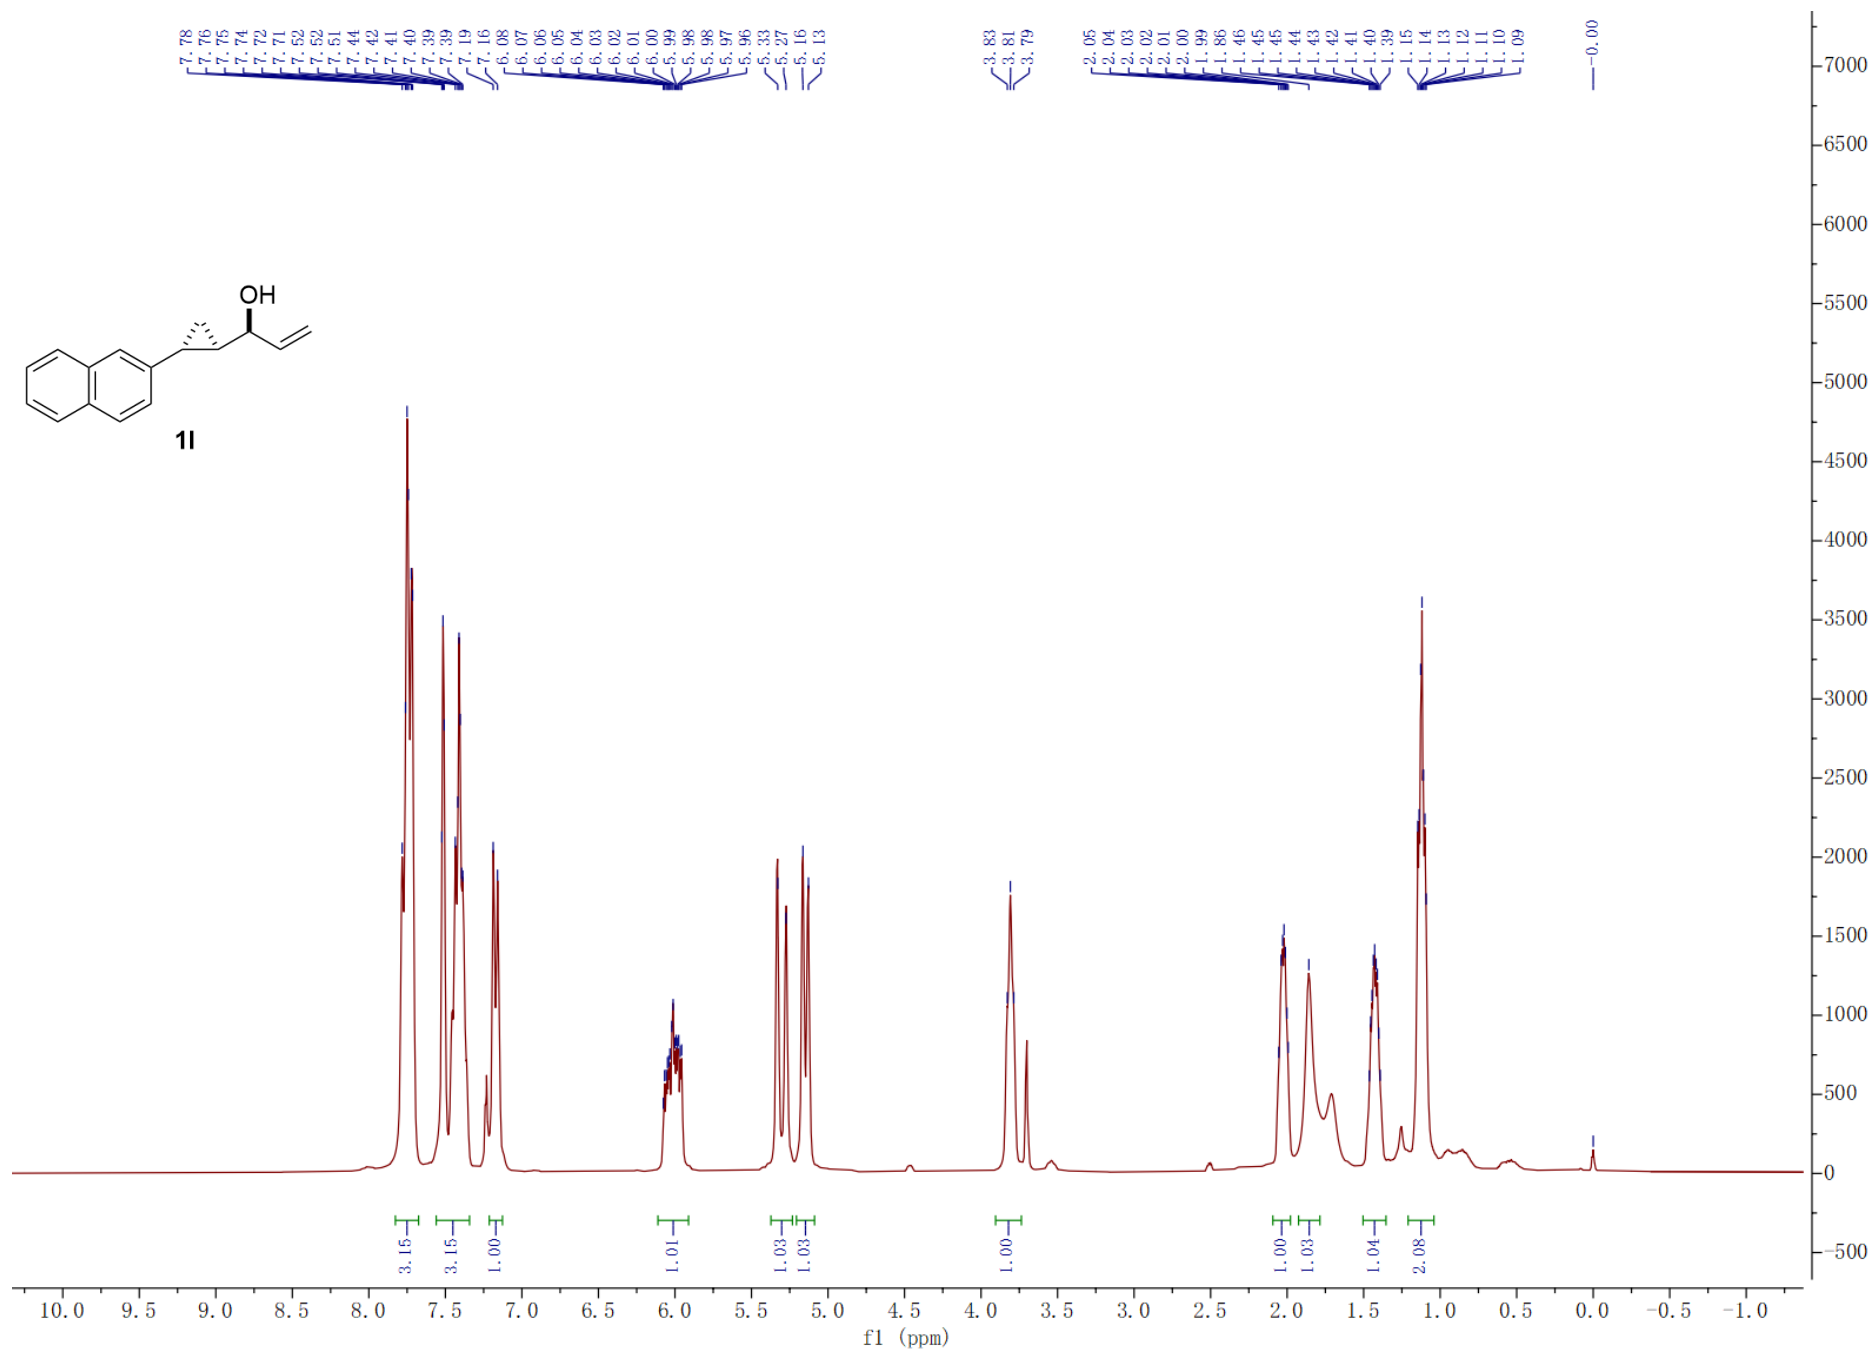

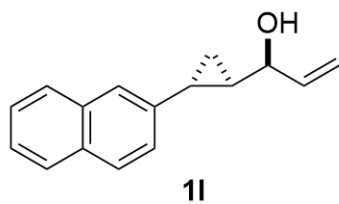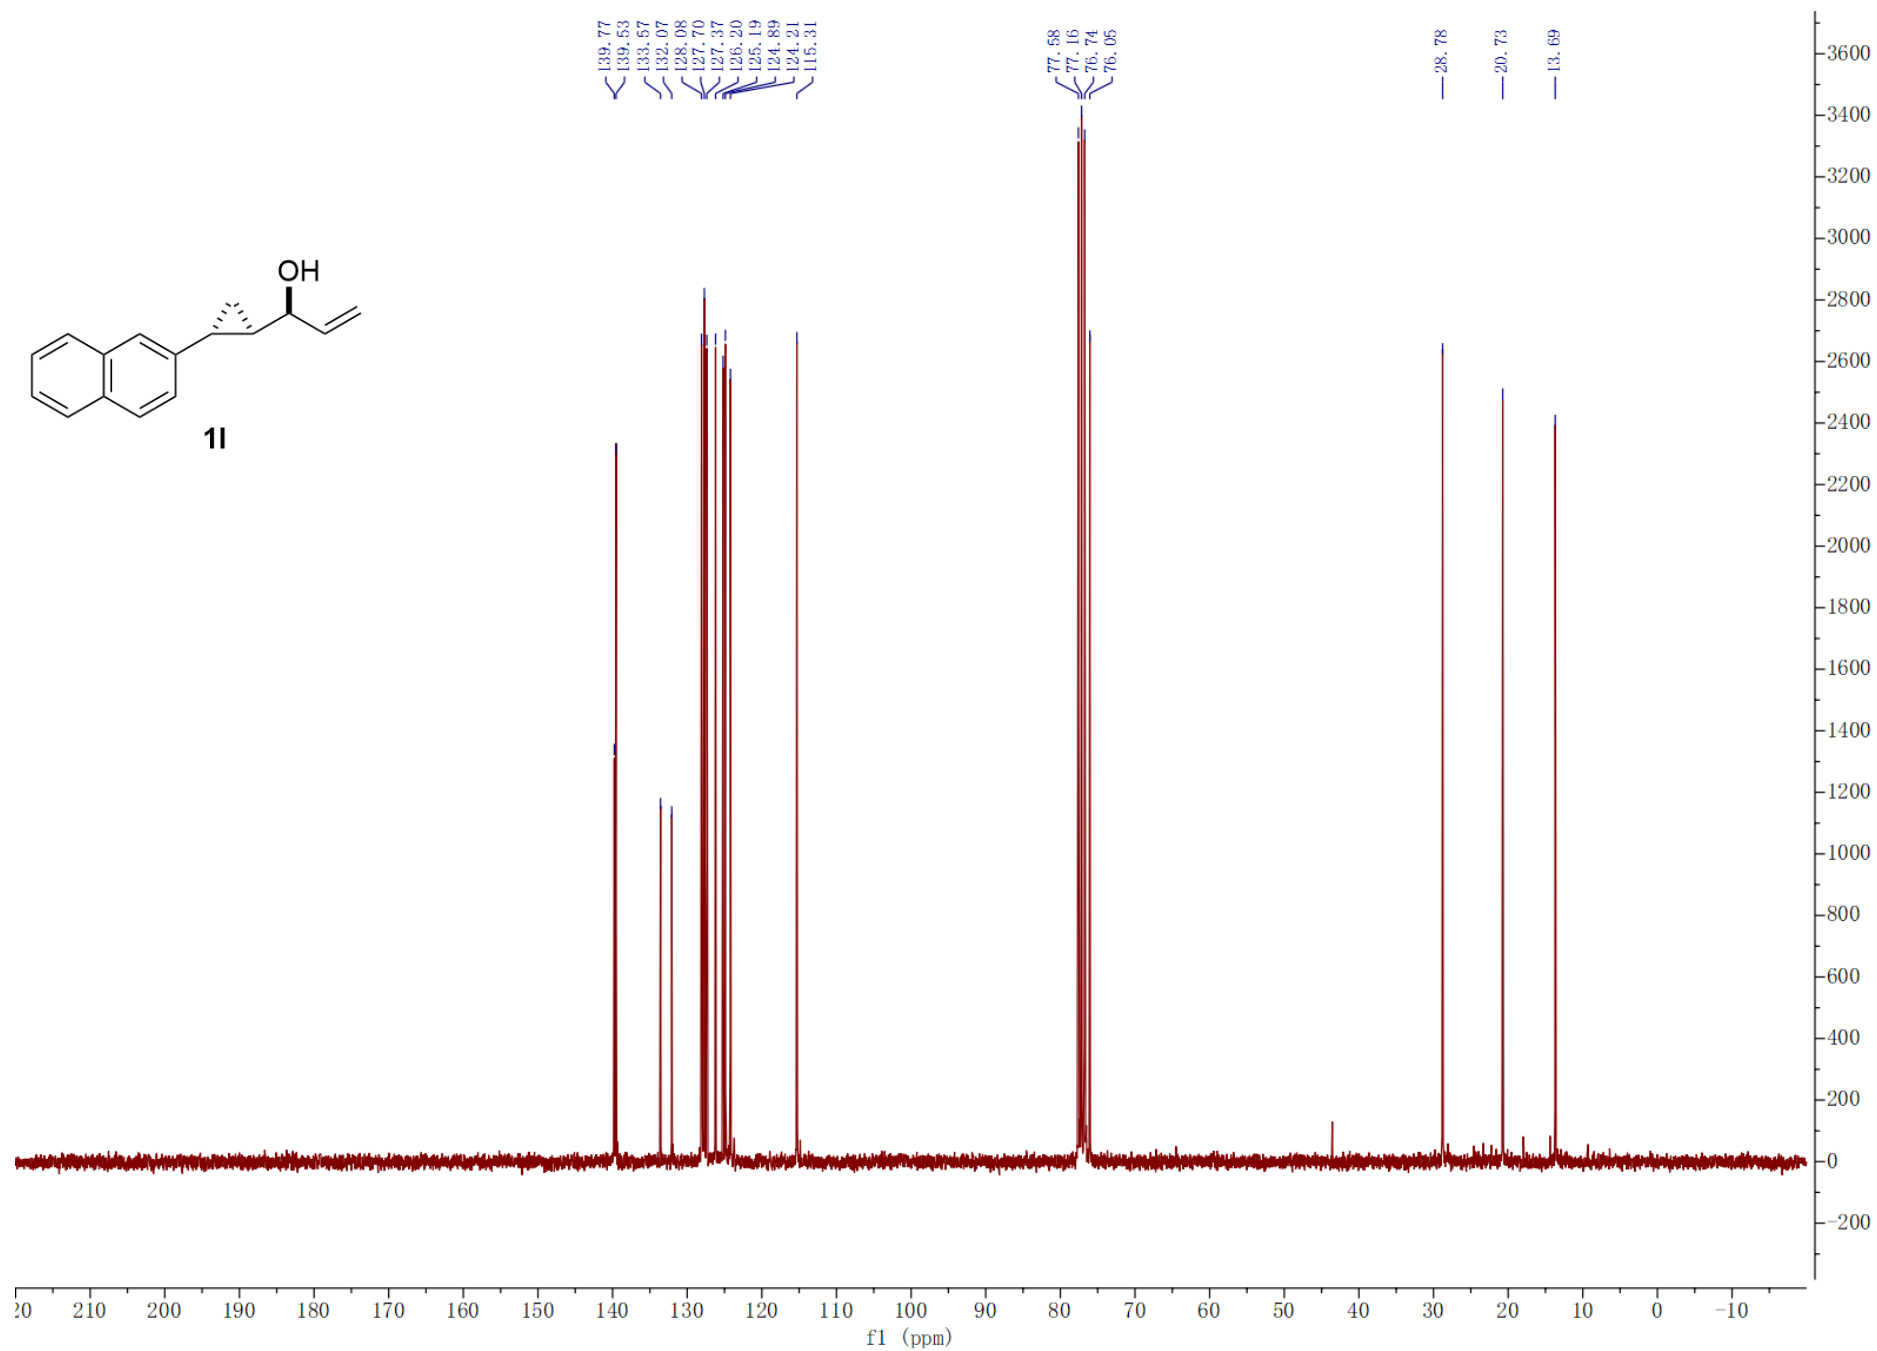

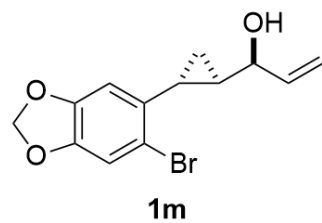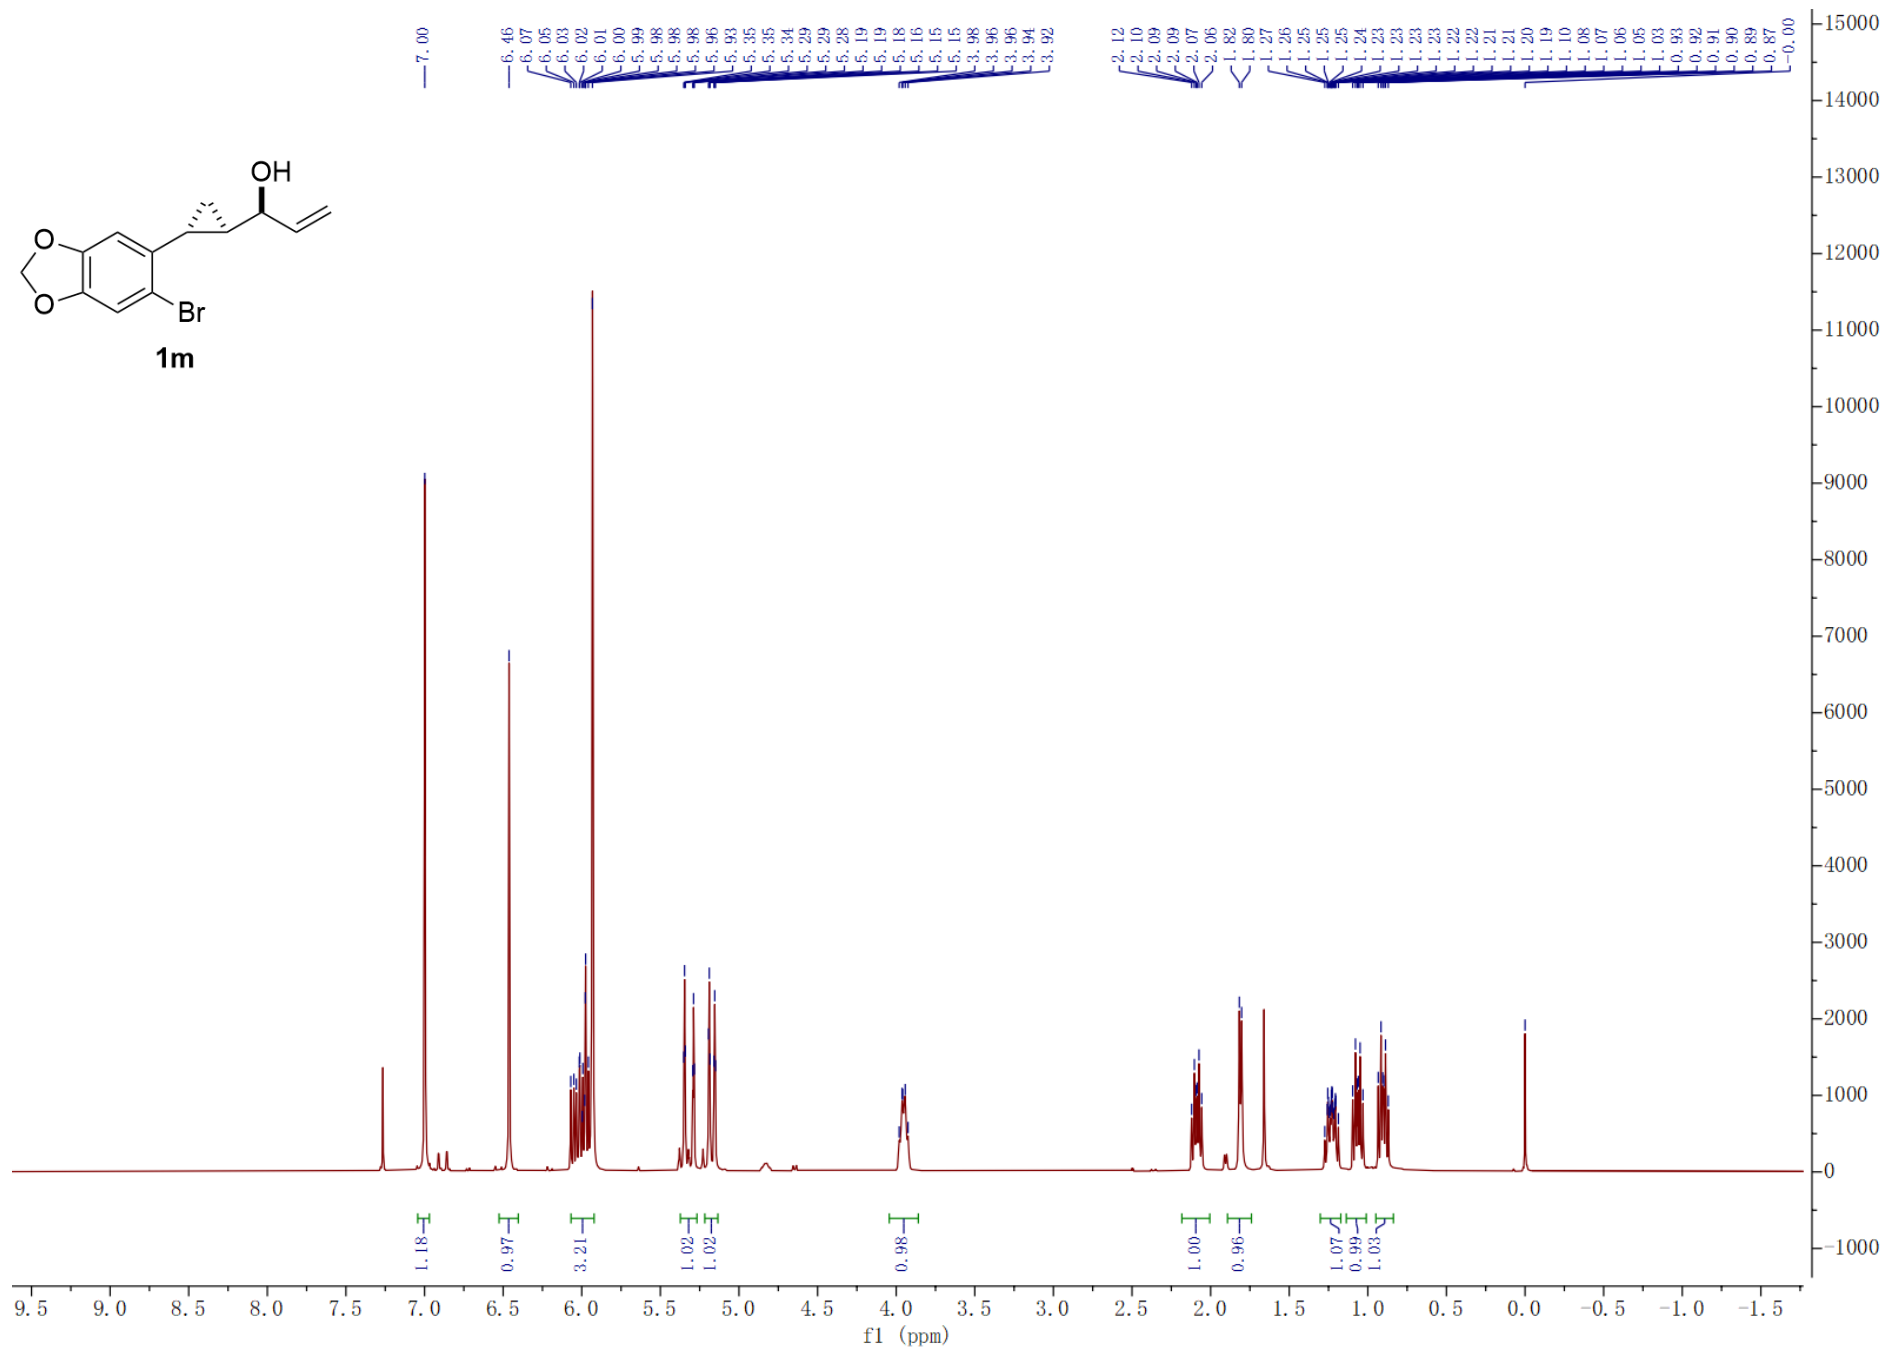

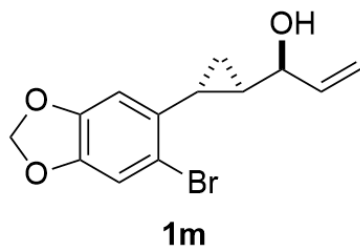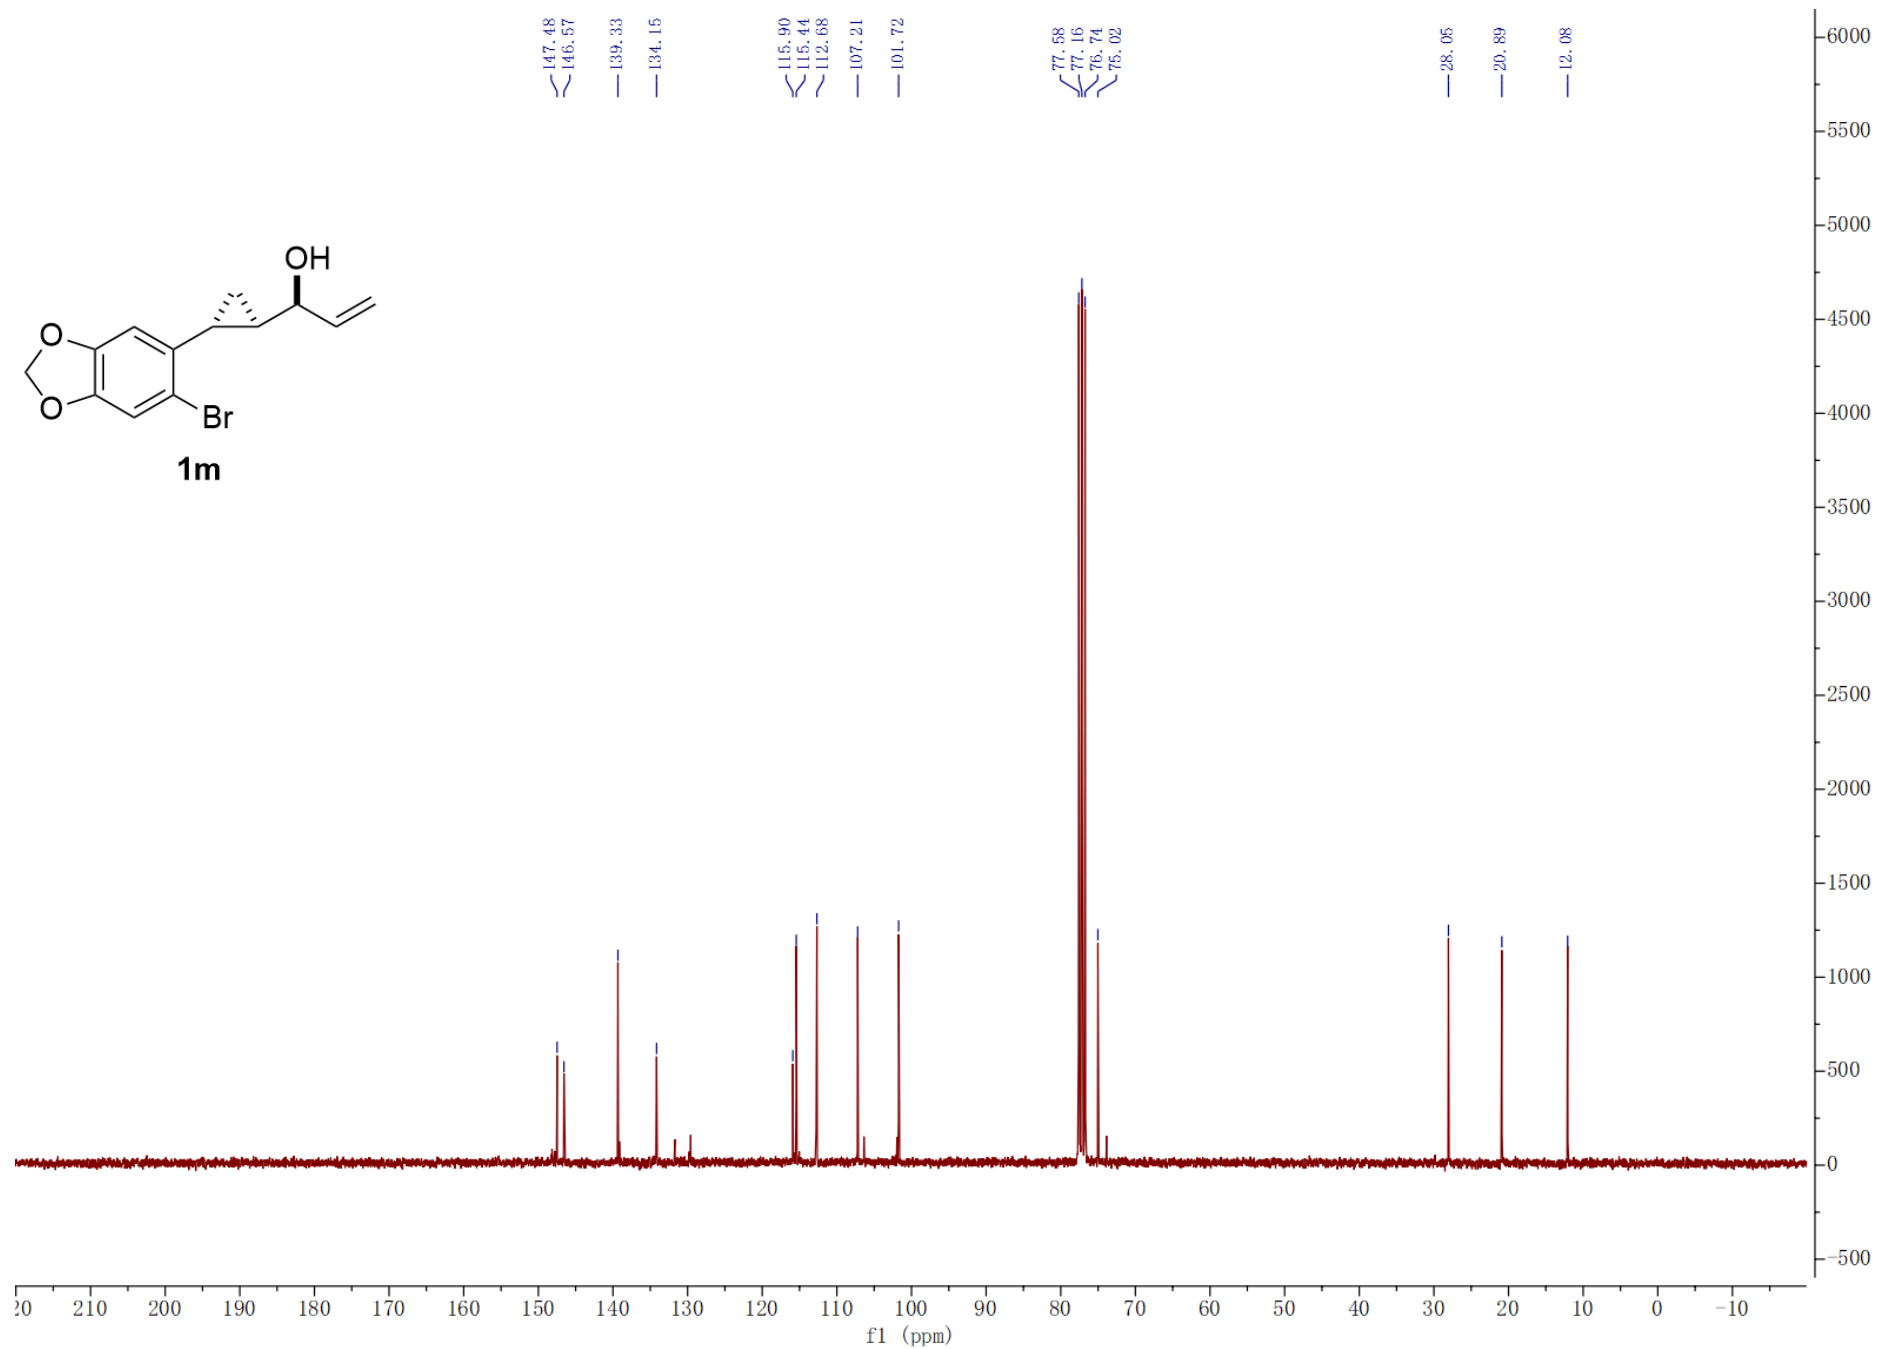

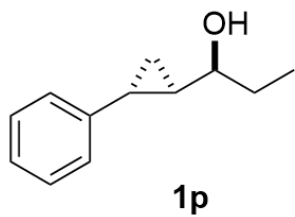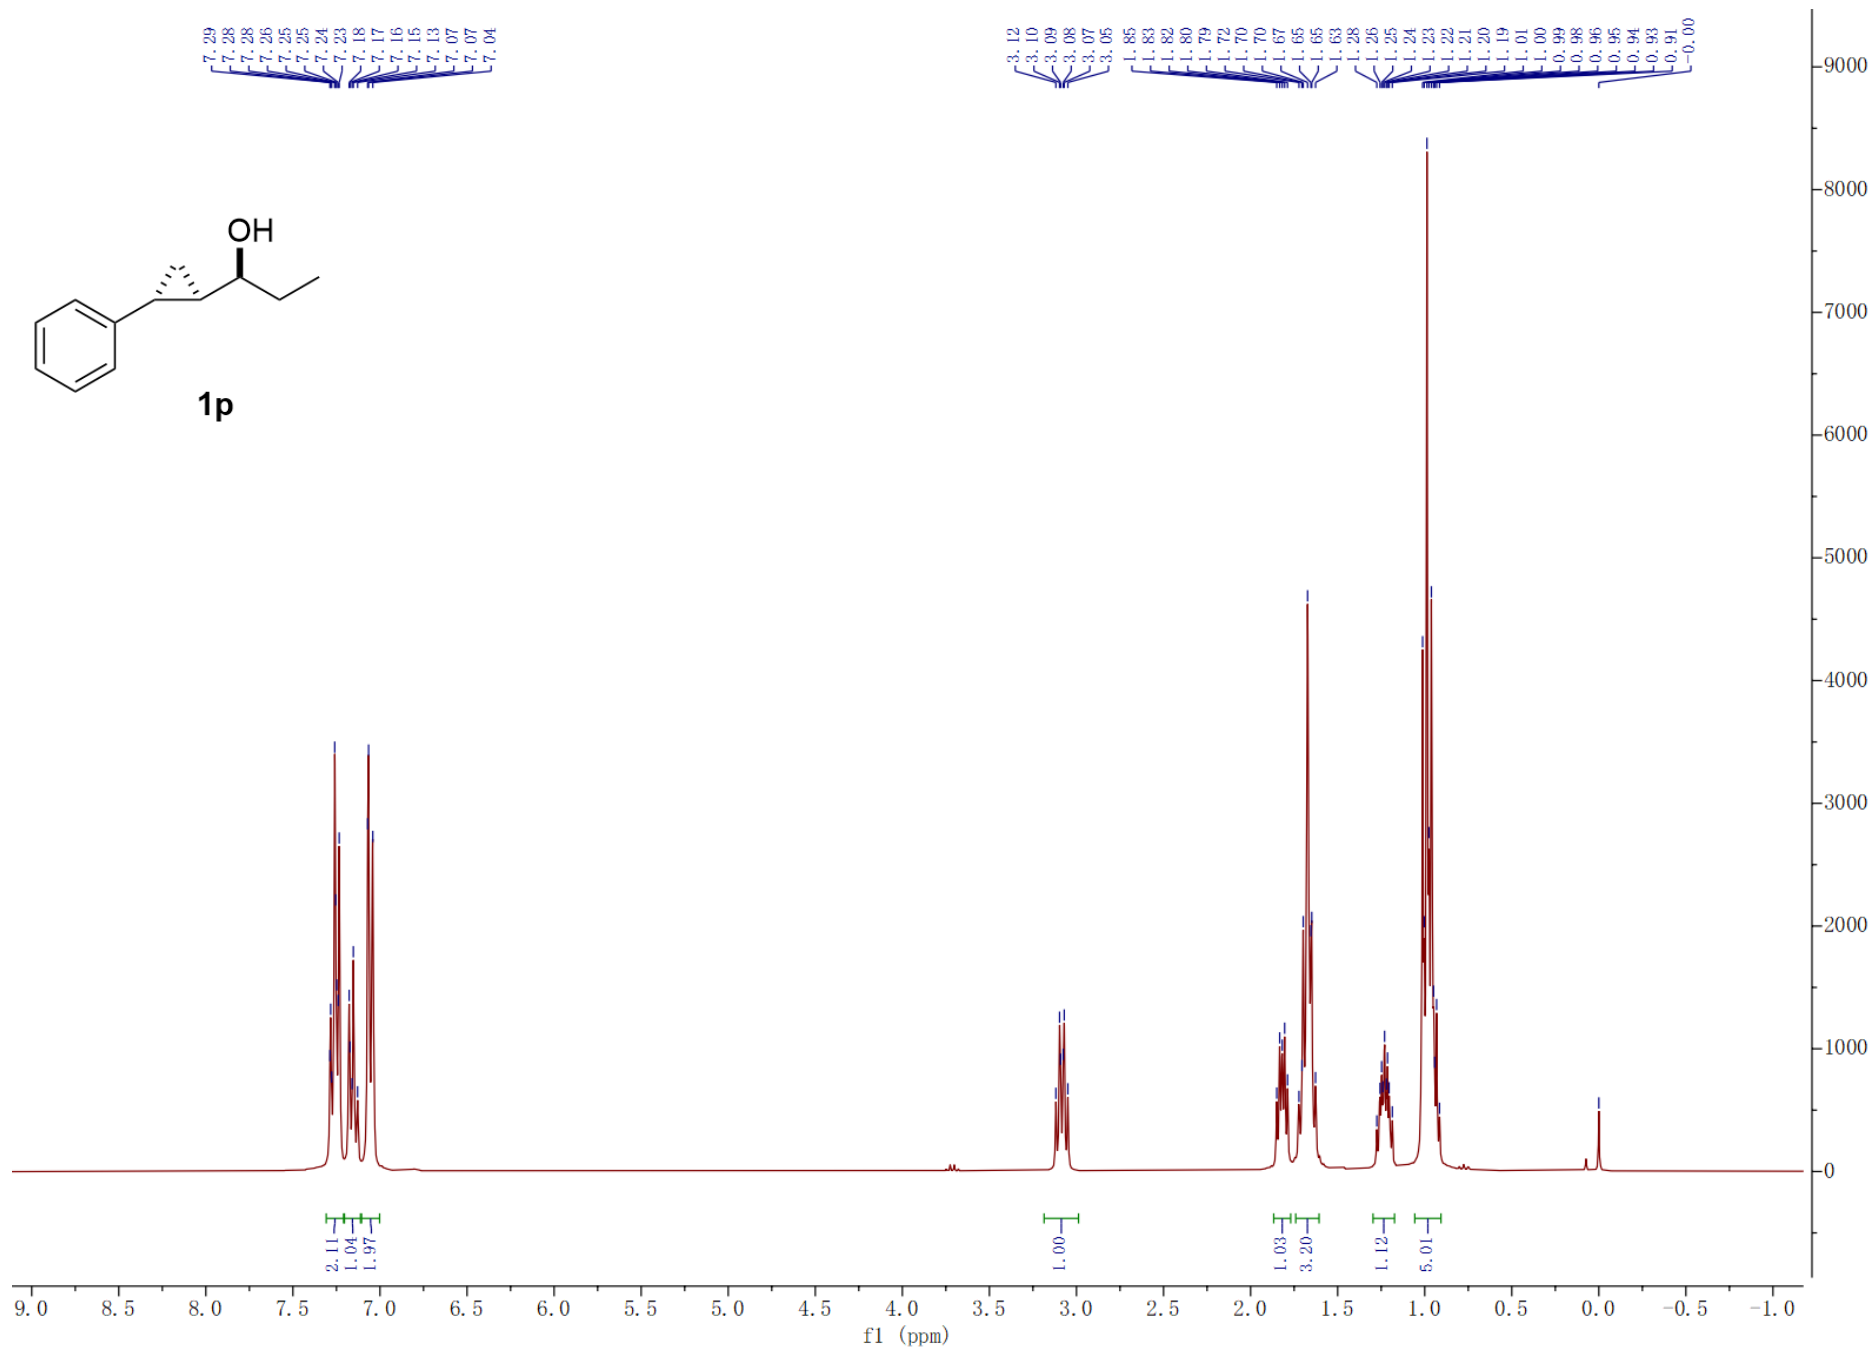

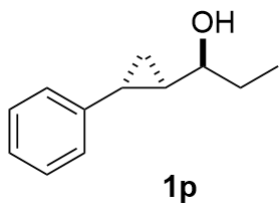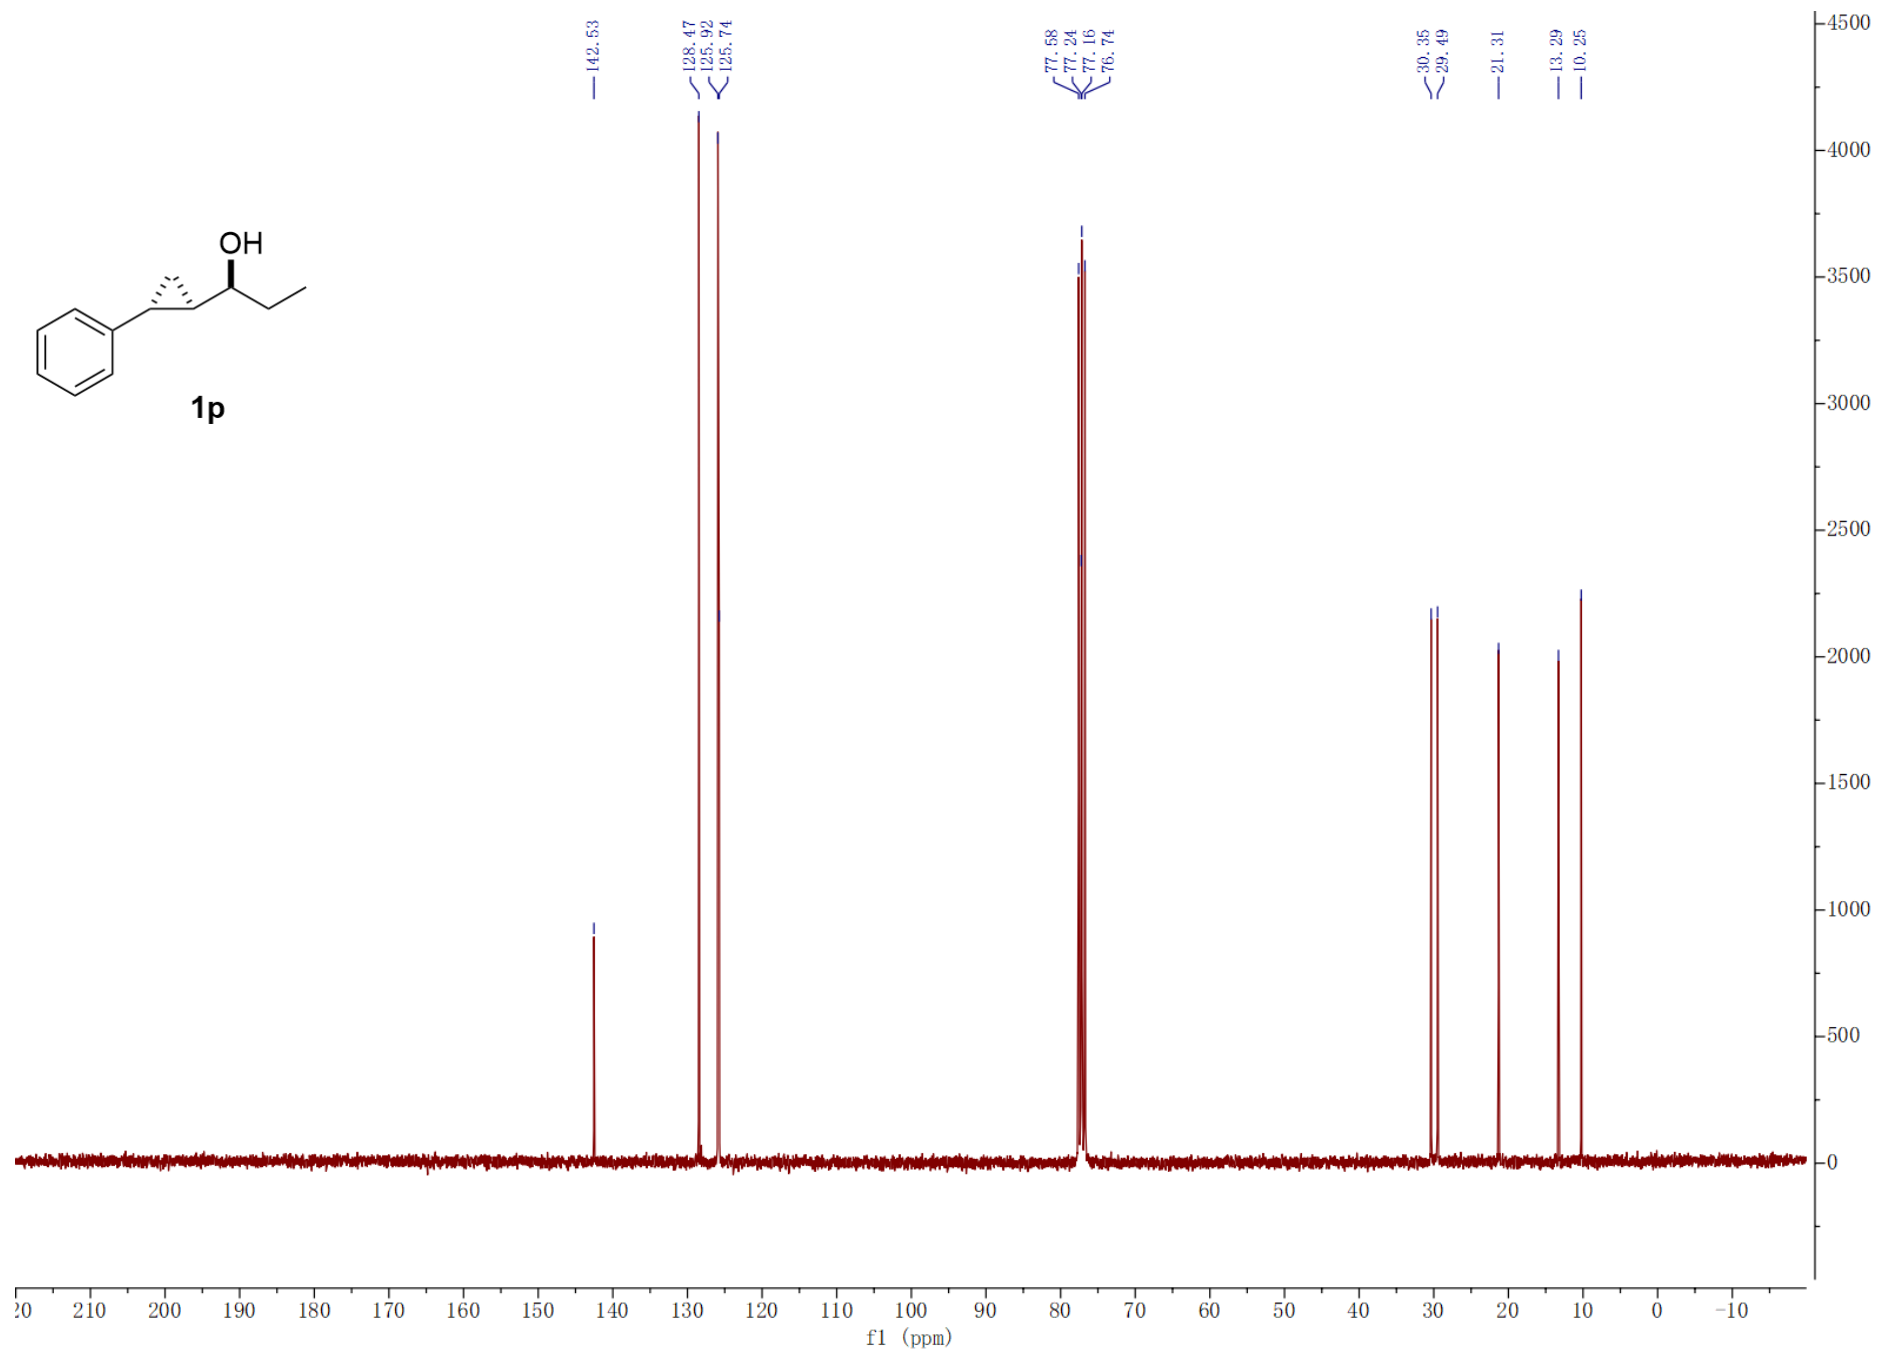

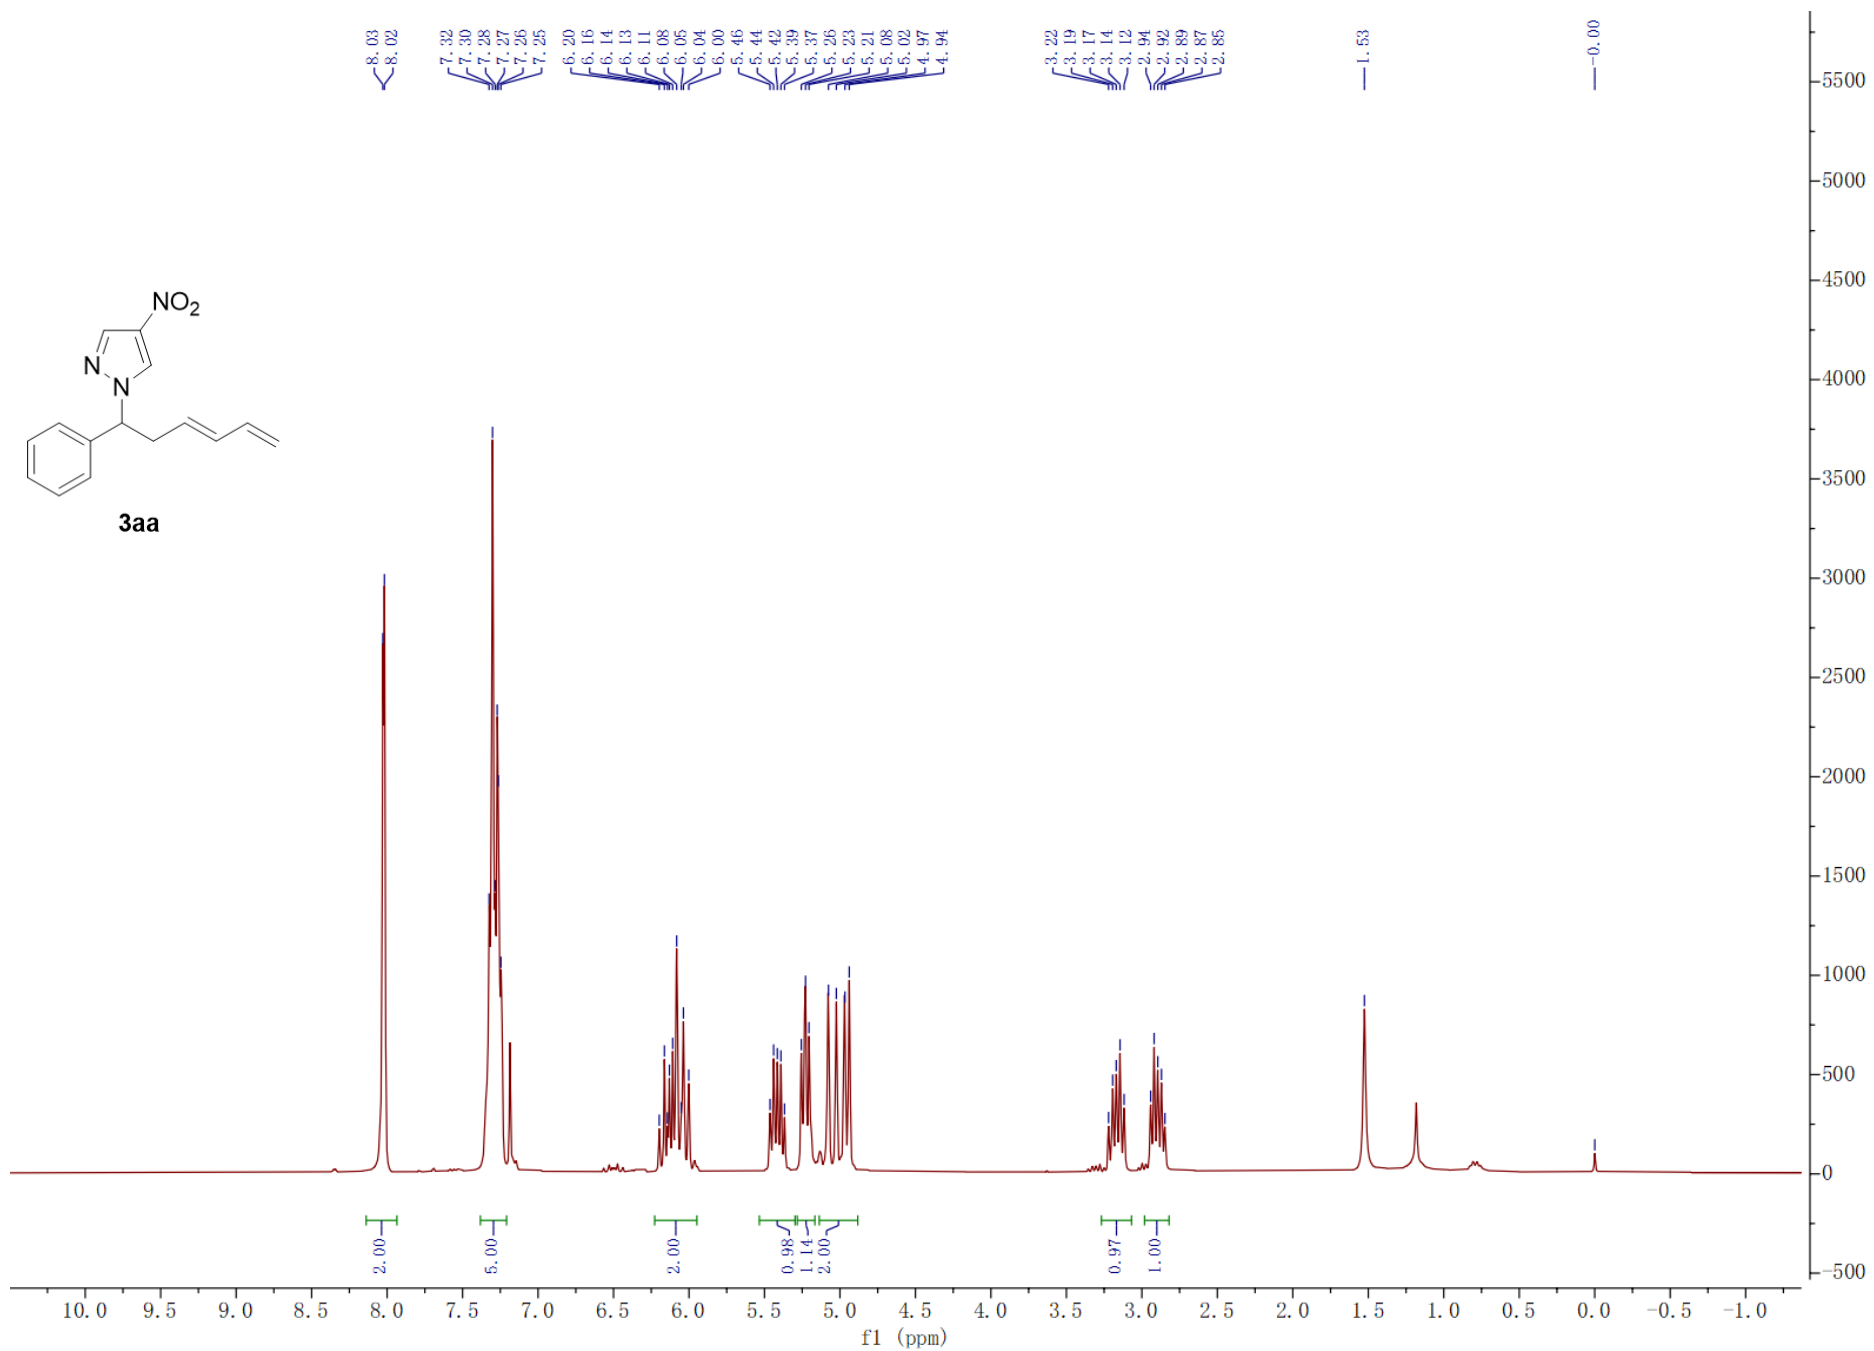

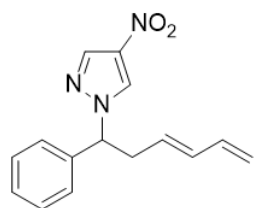

**3aa**

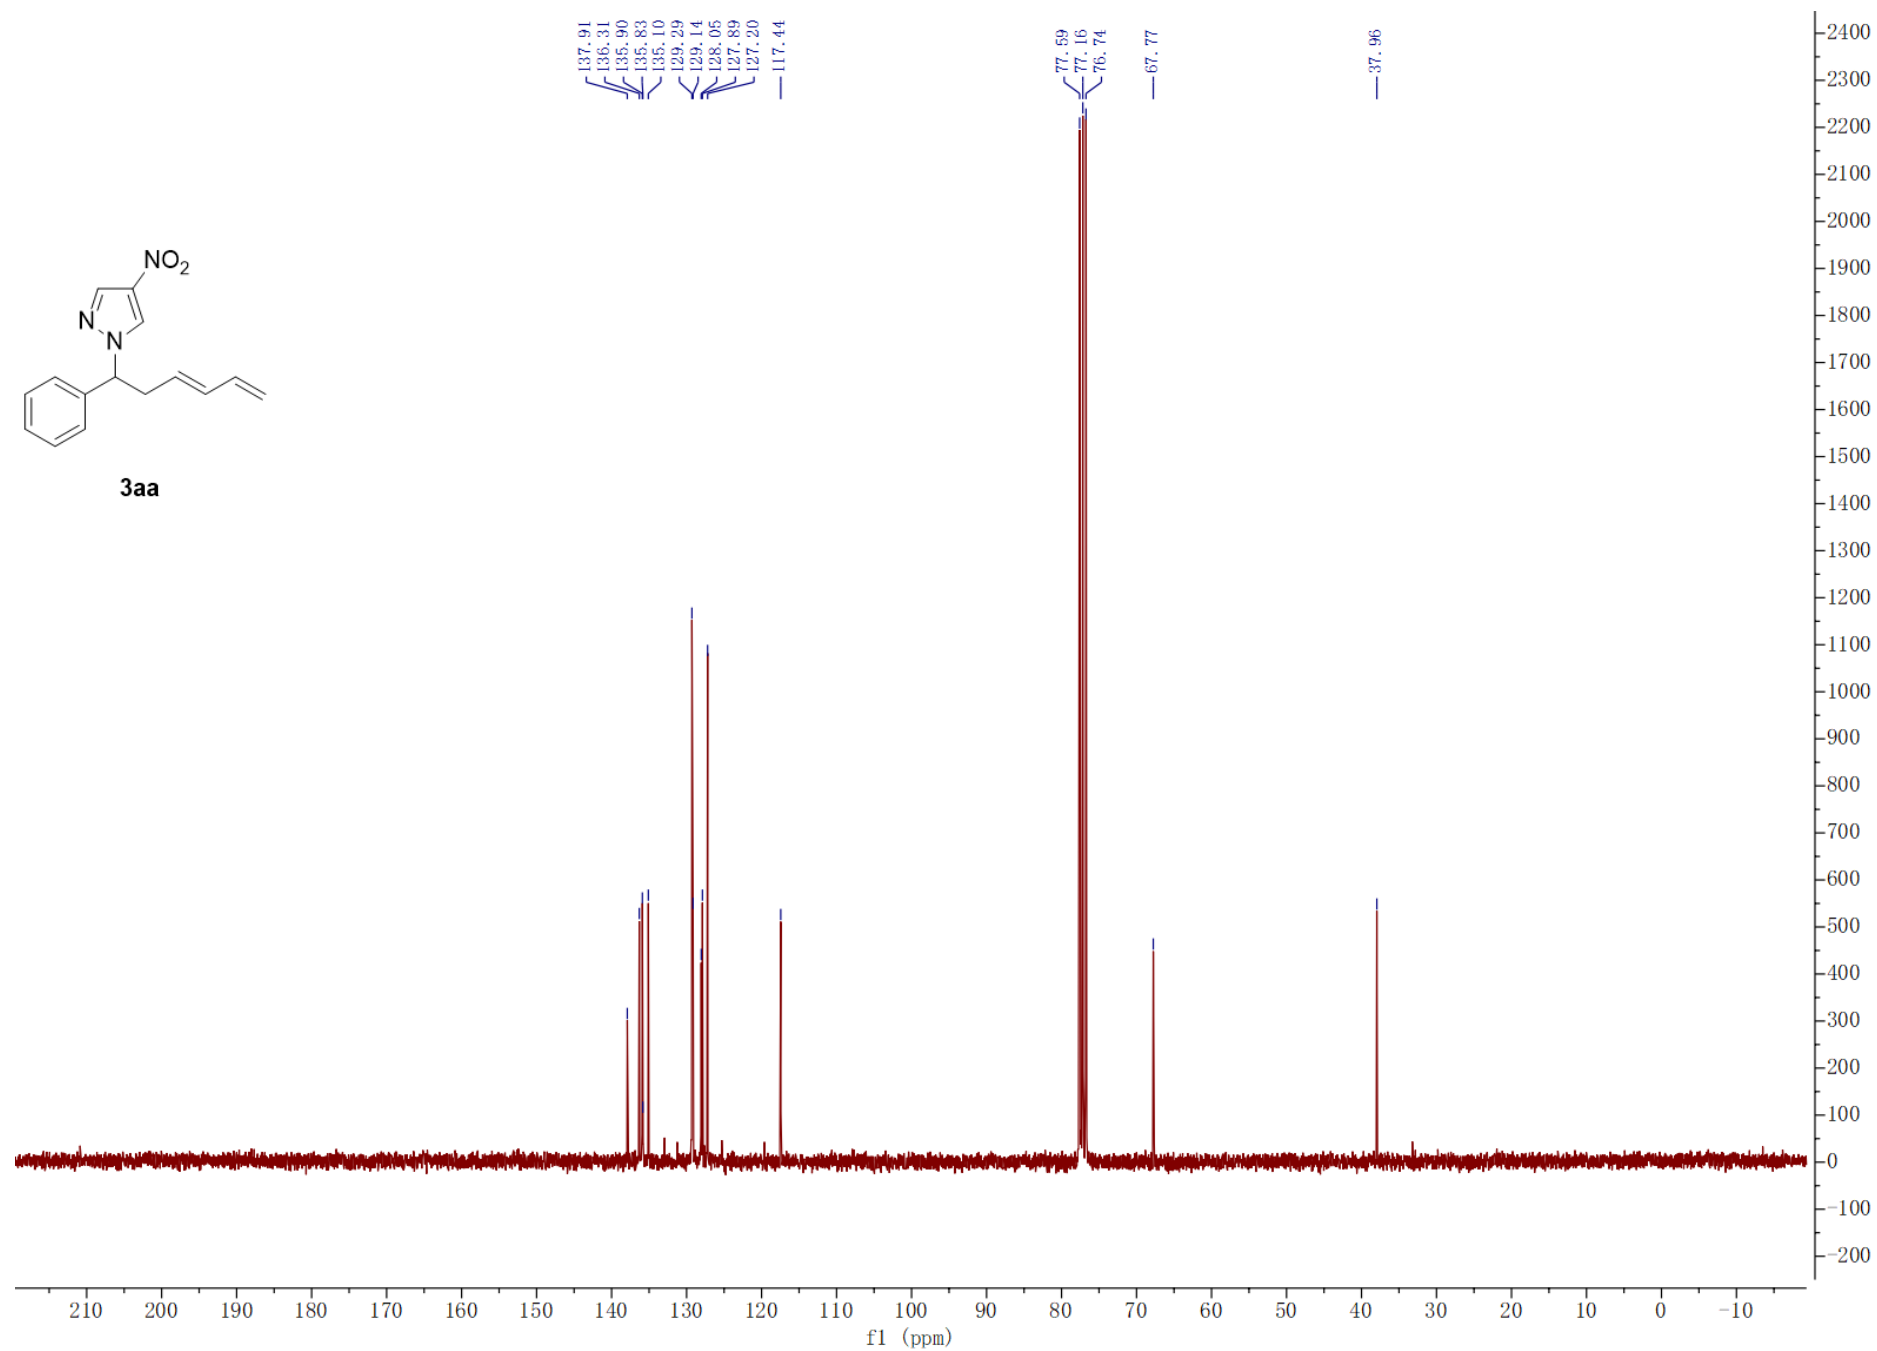



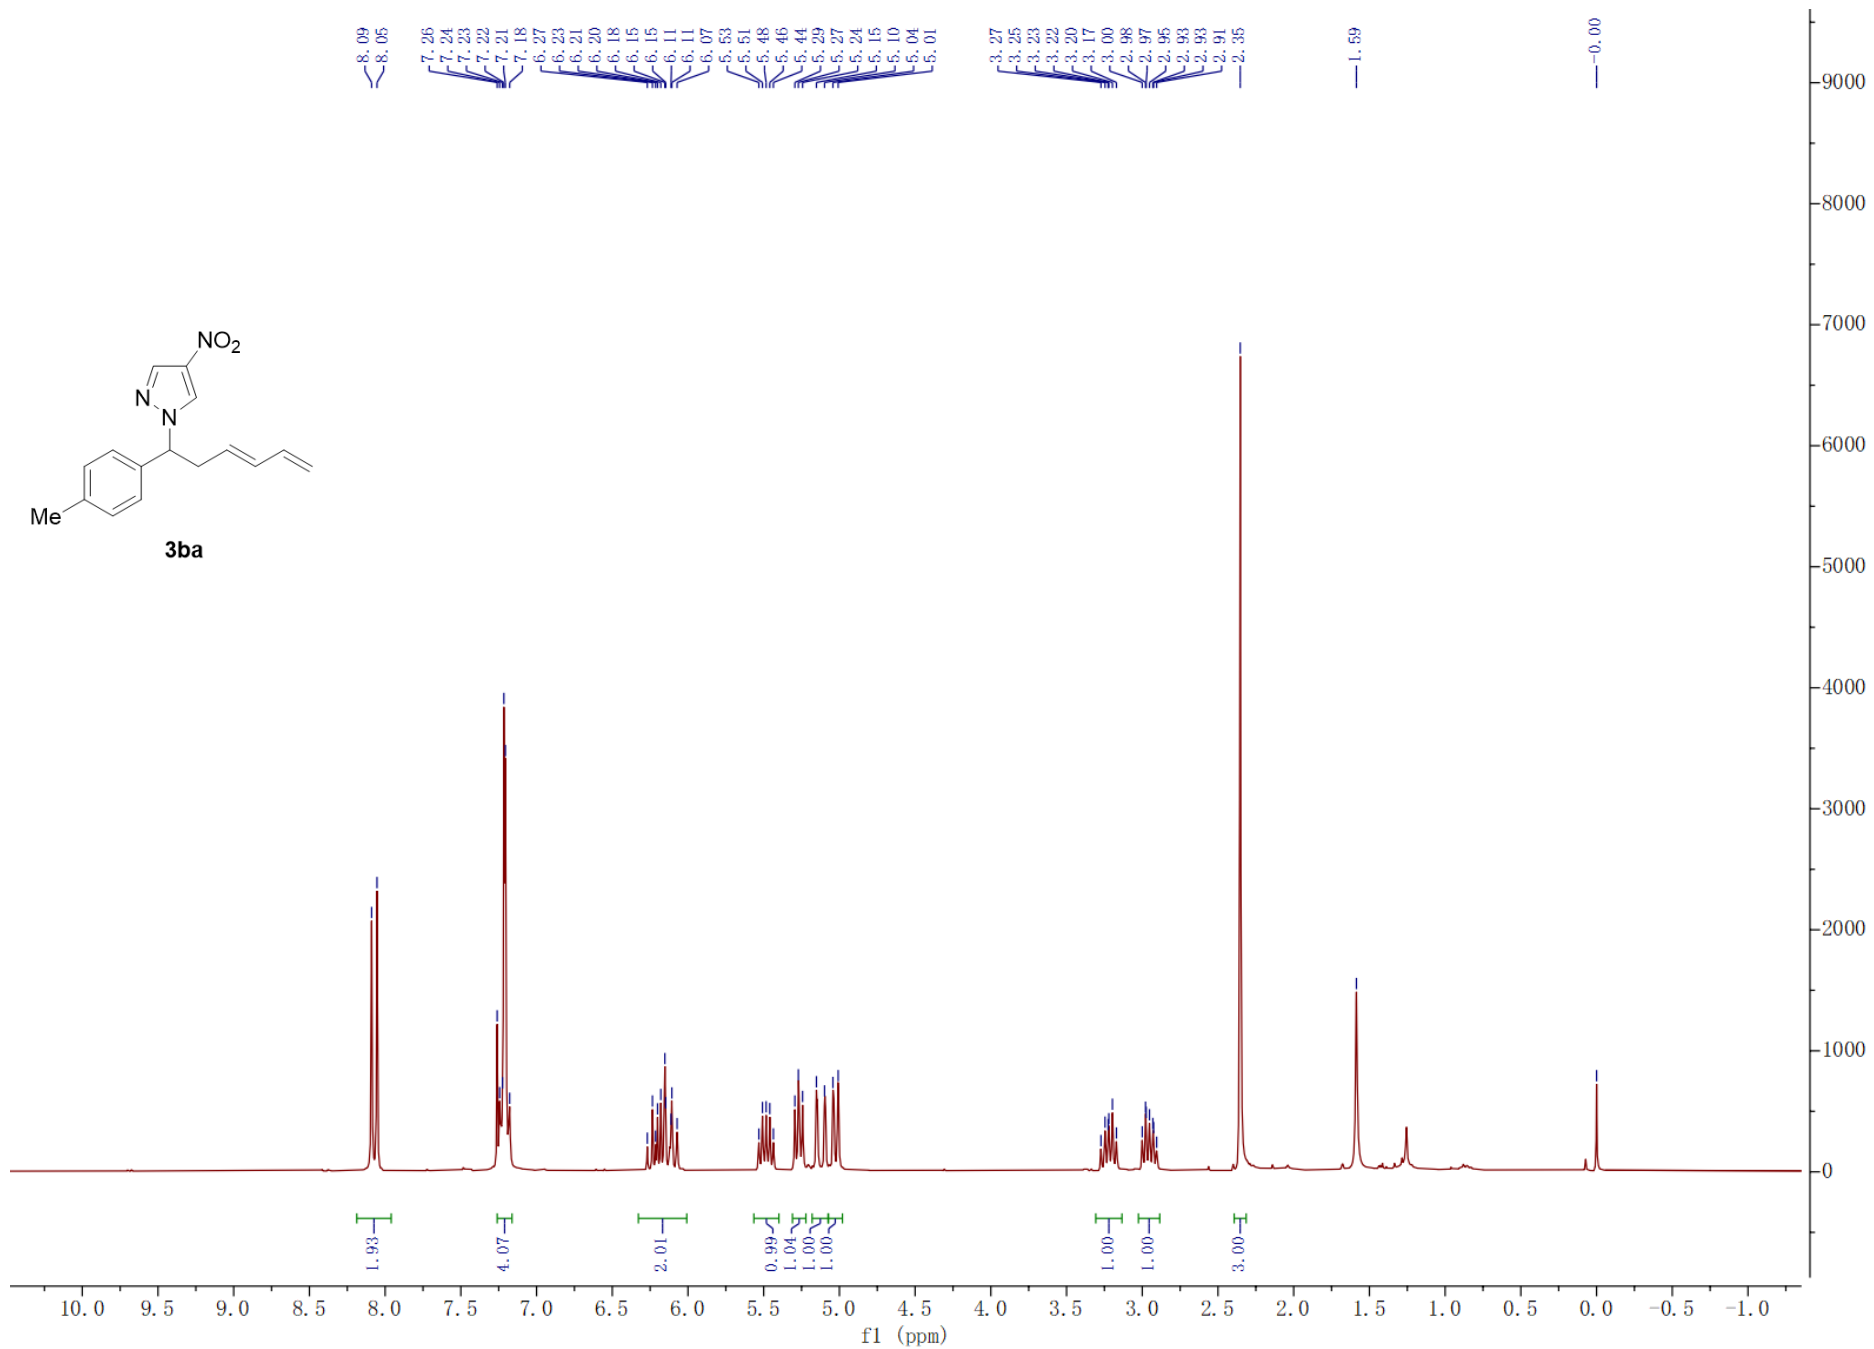

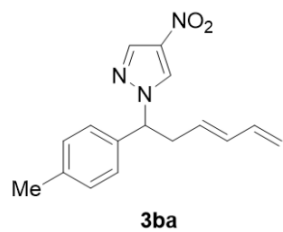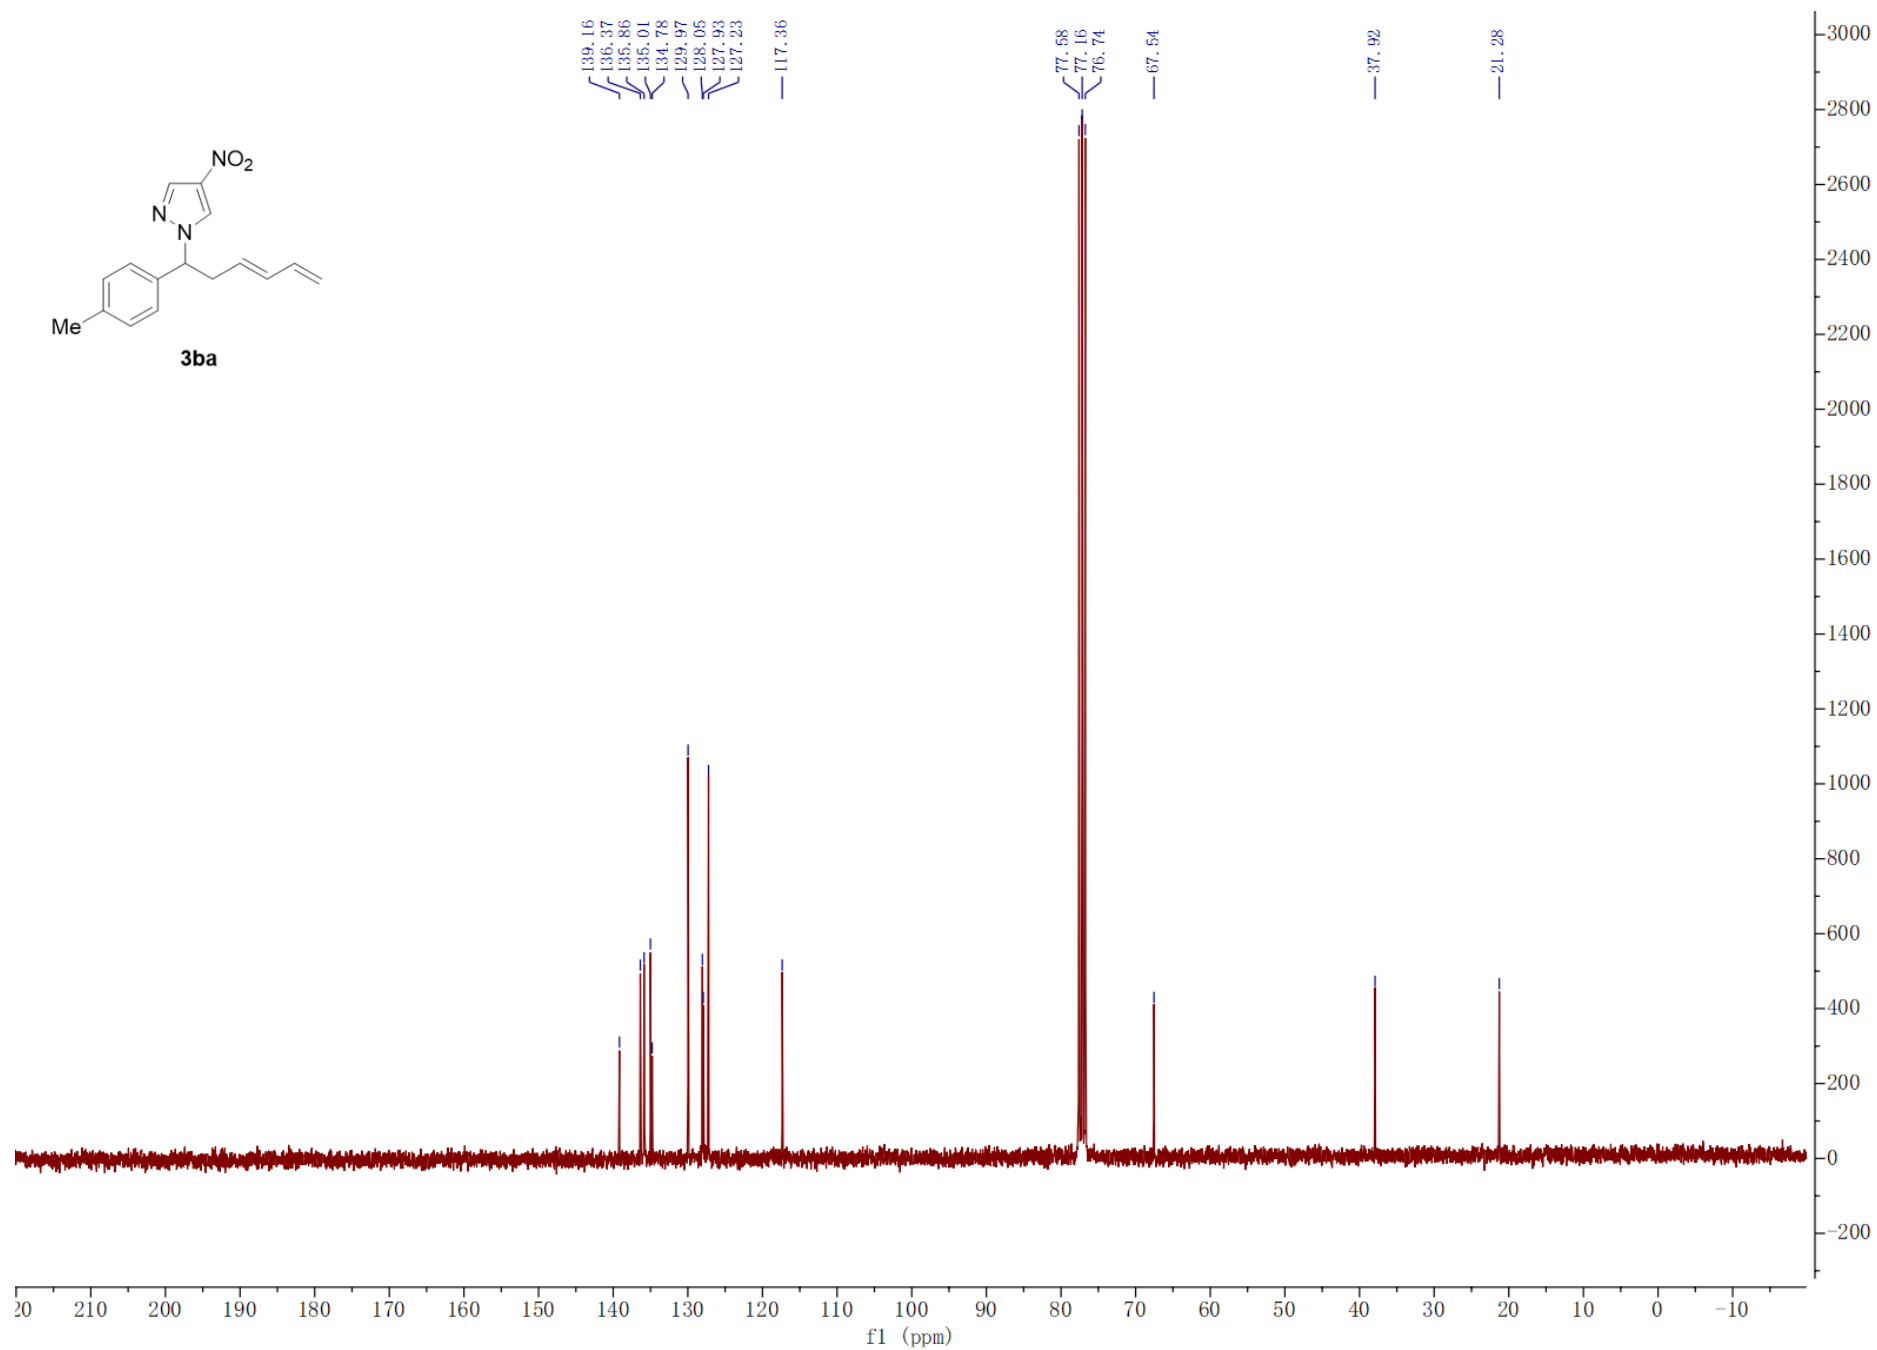

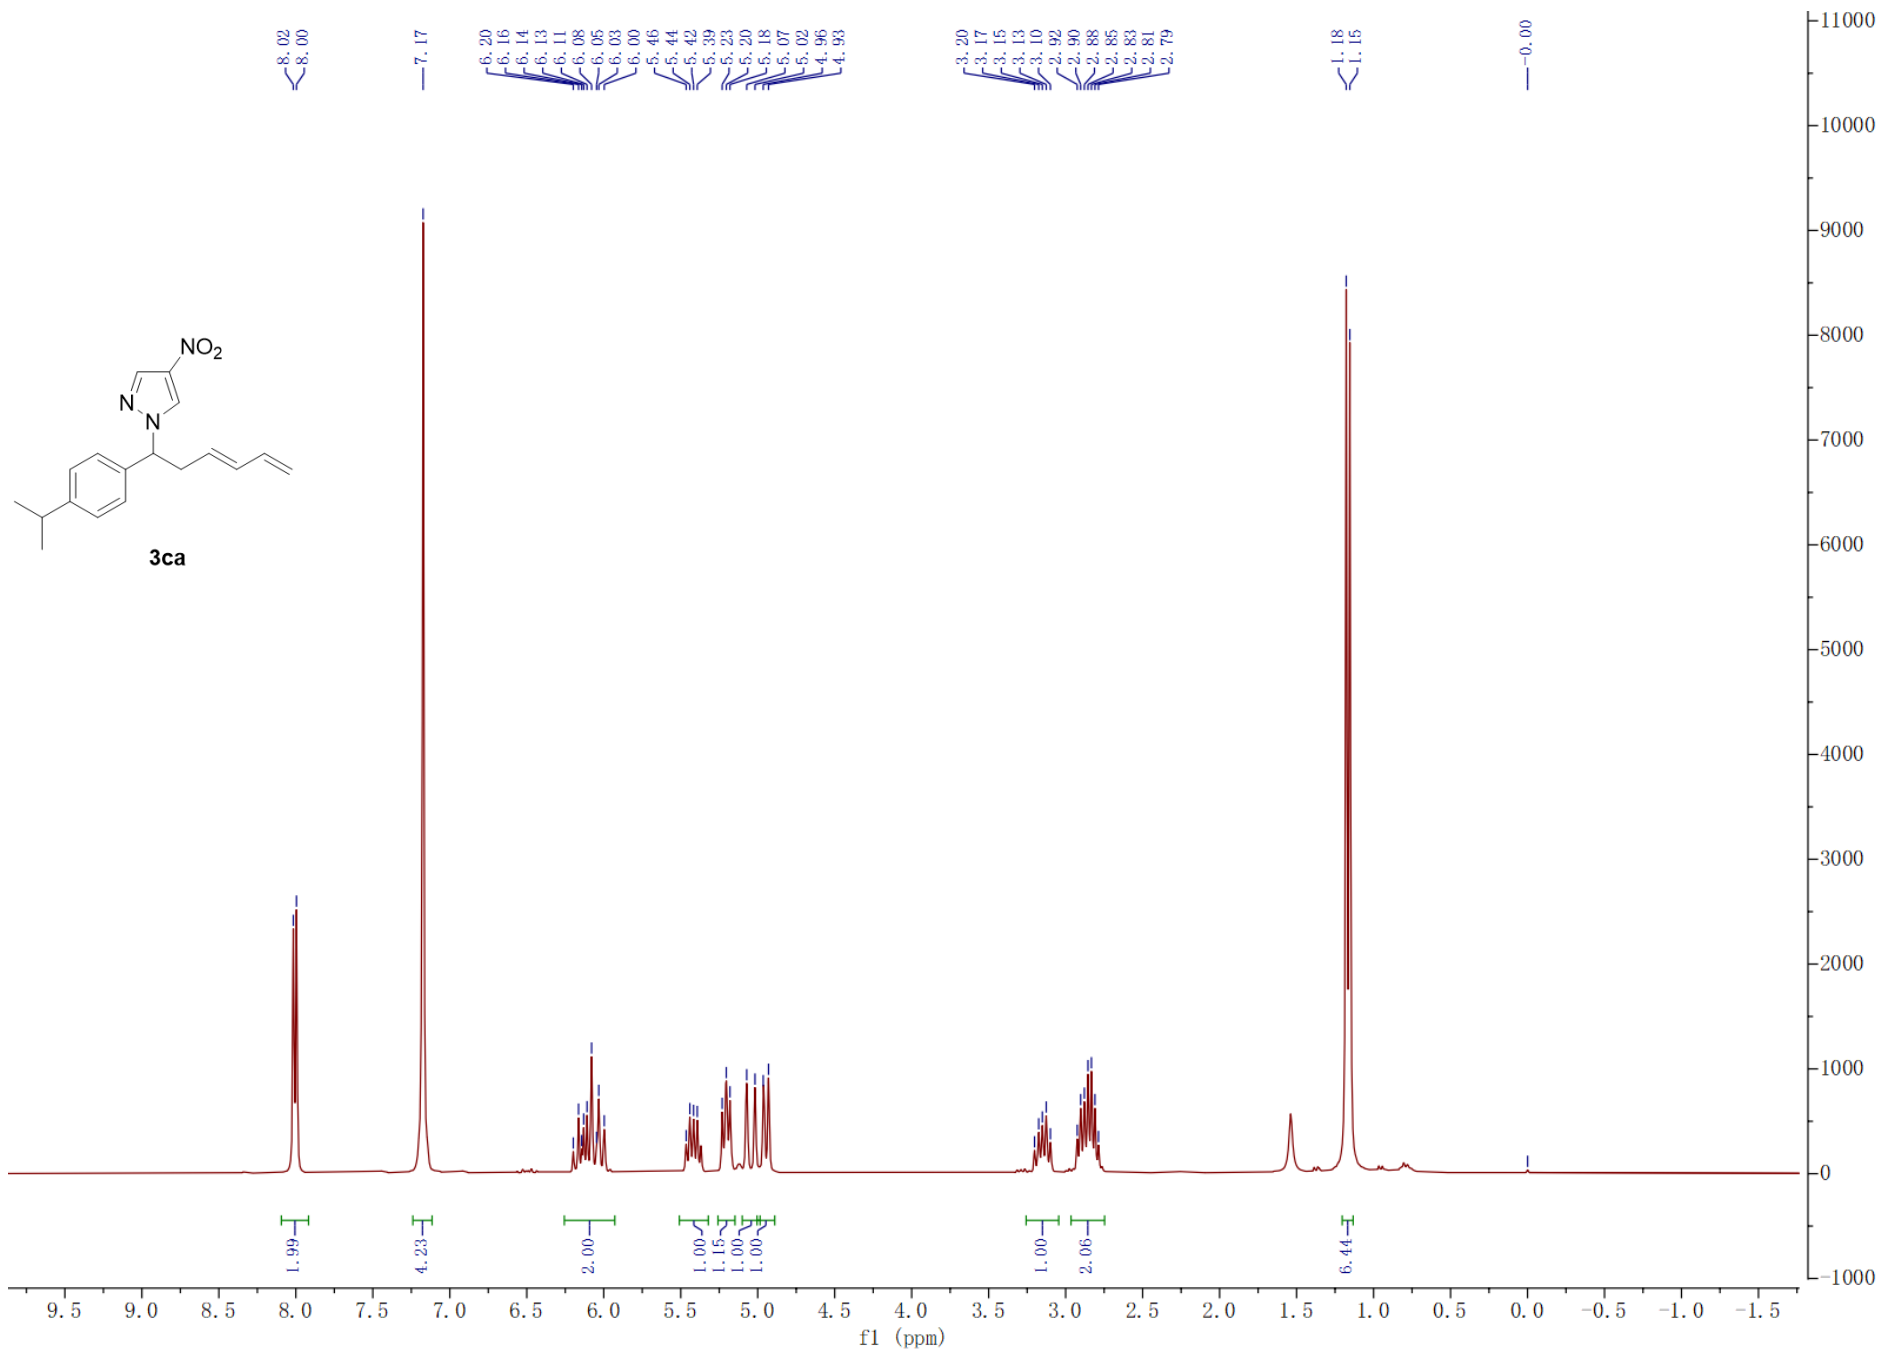

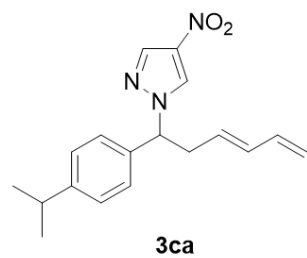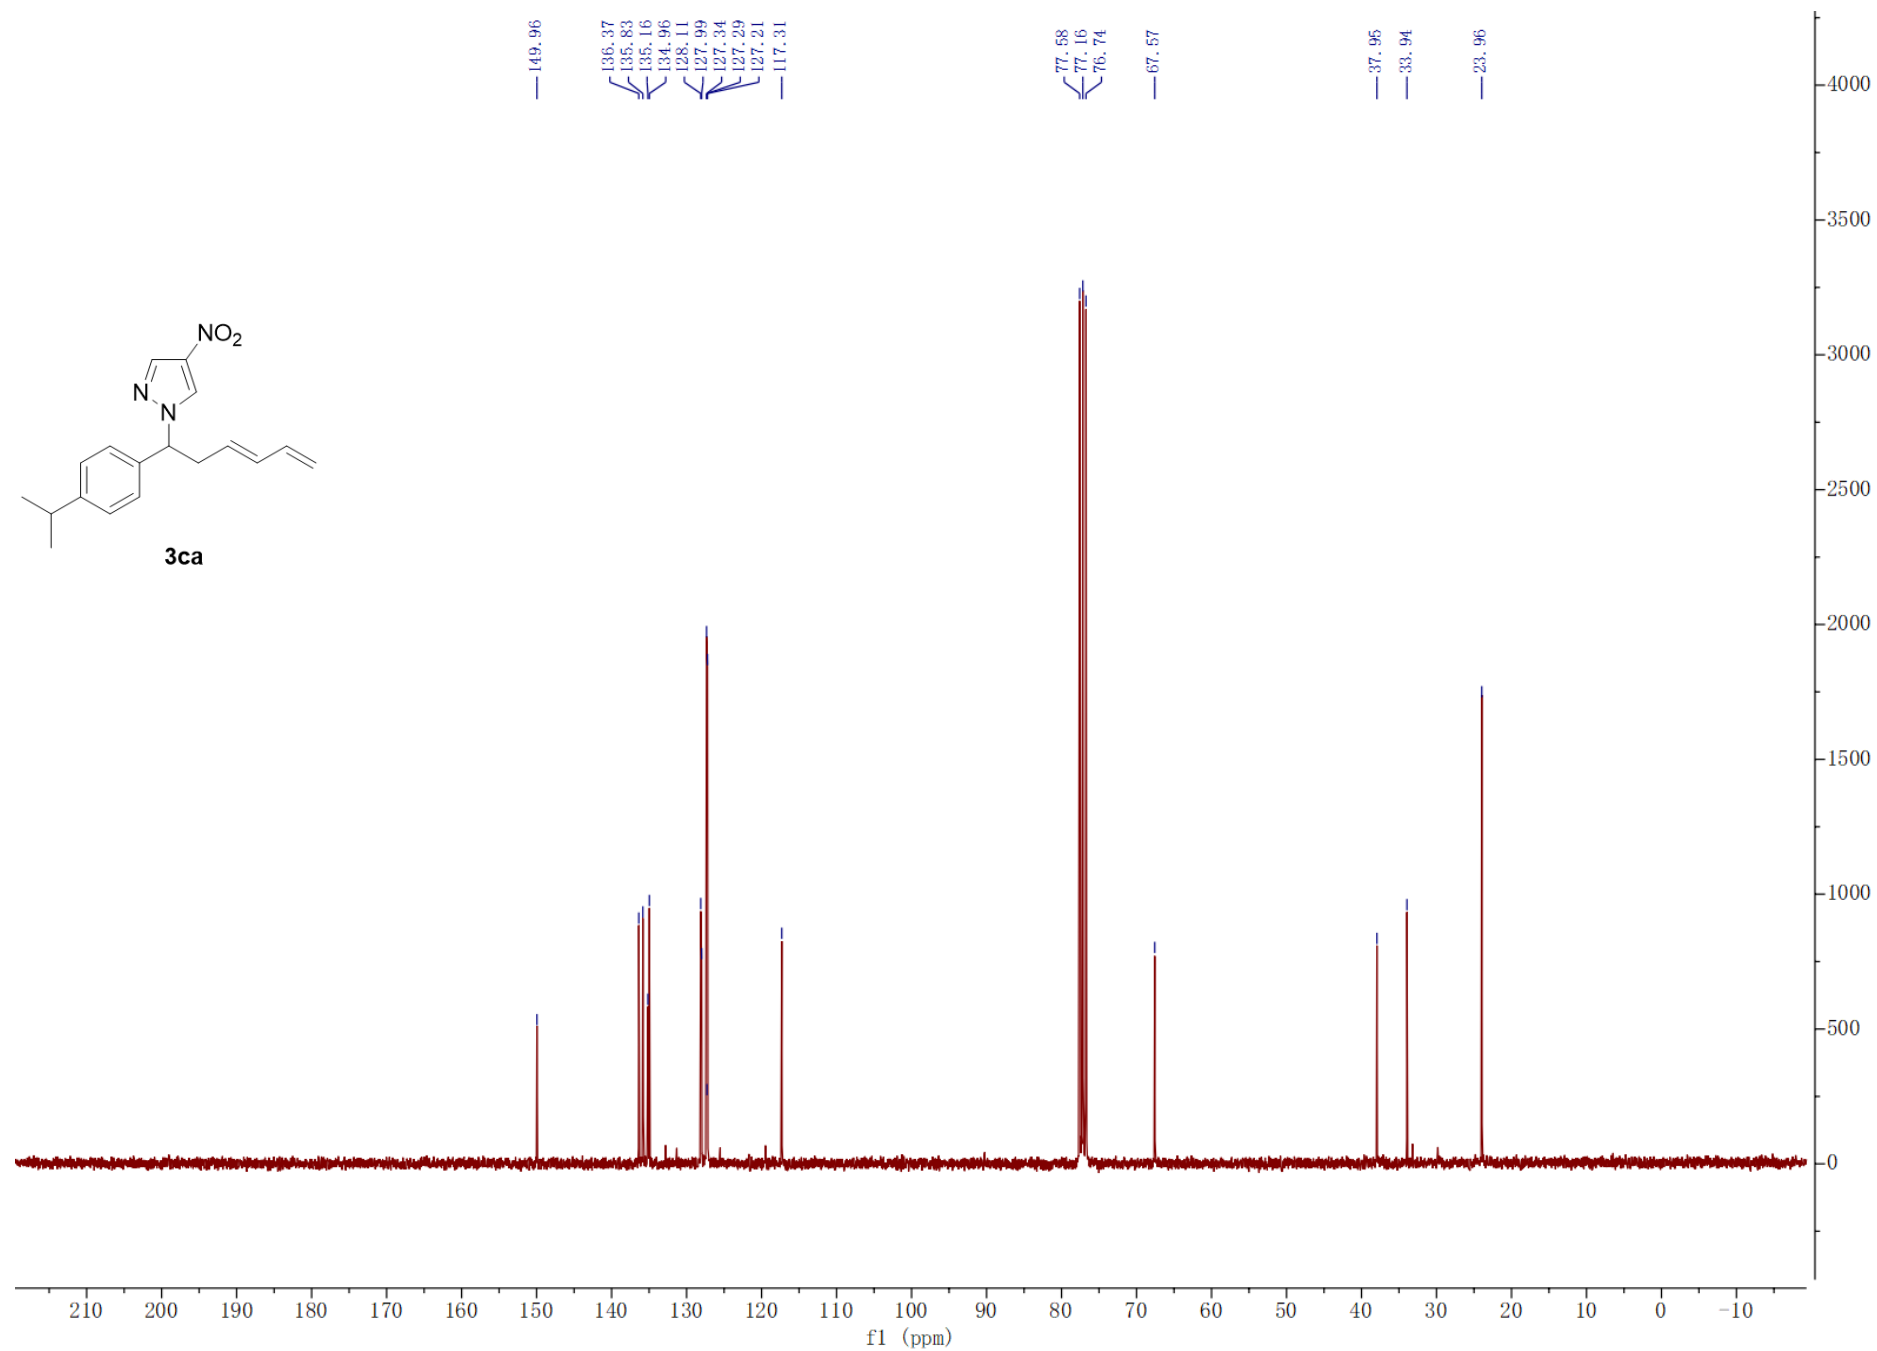

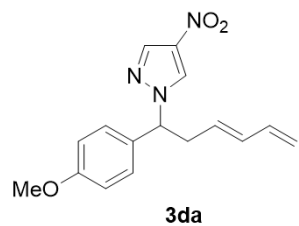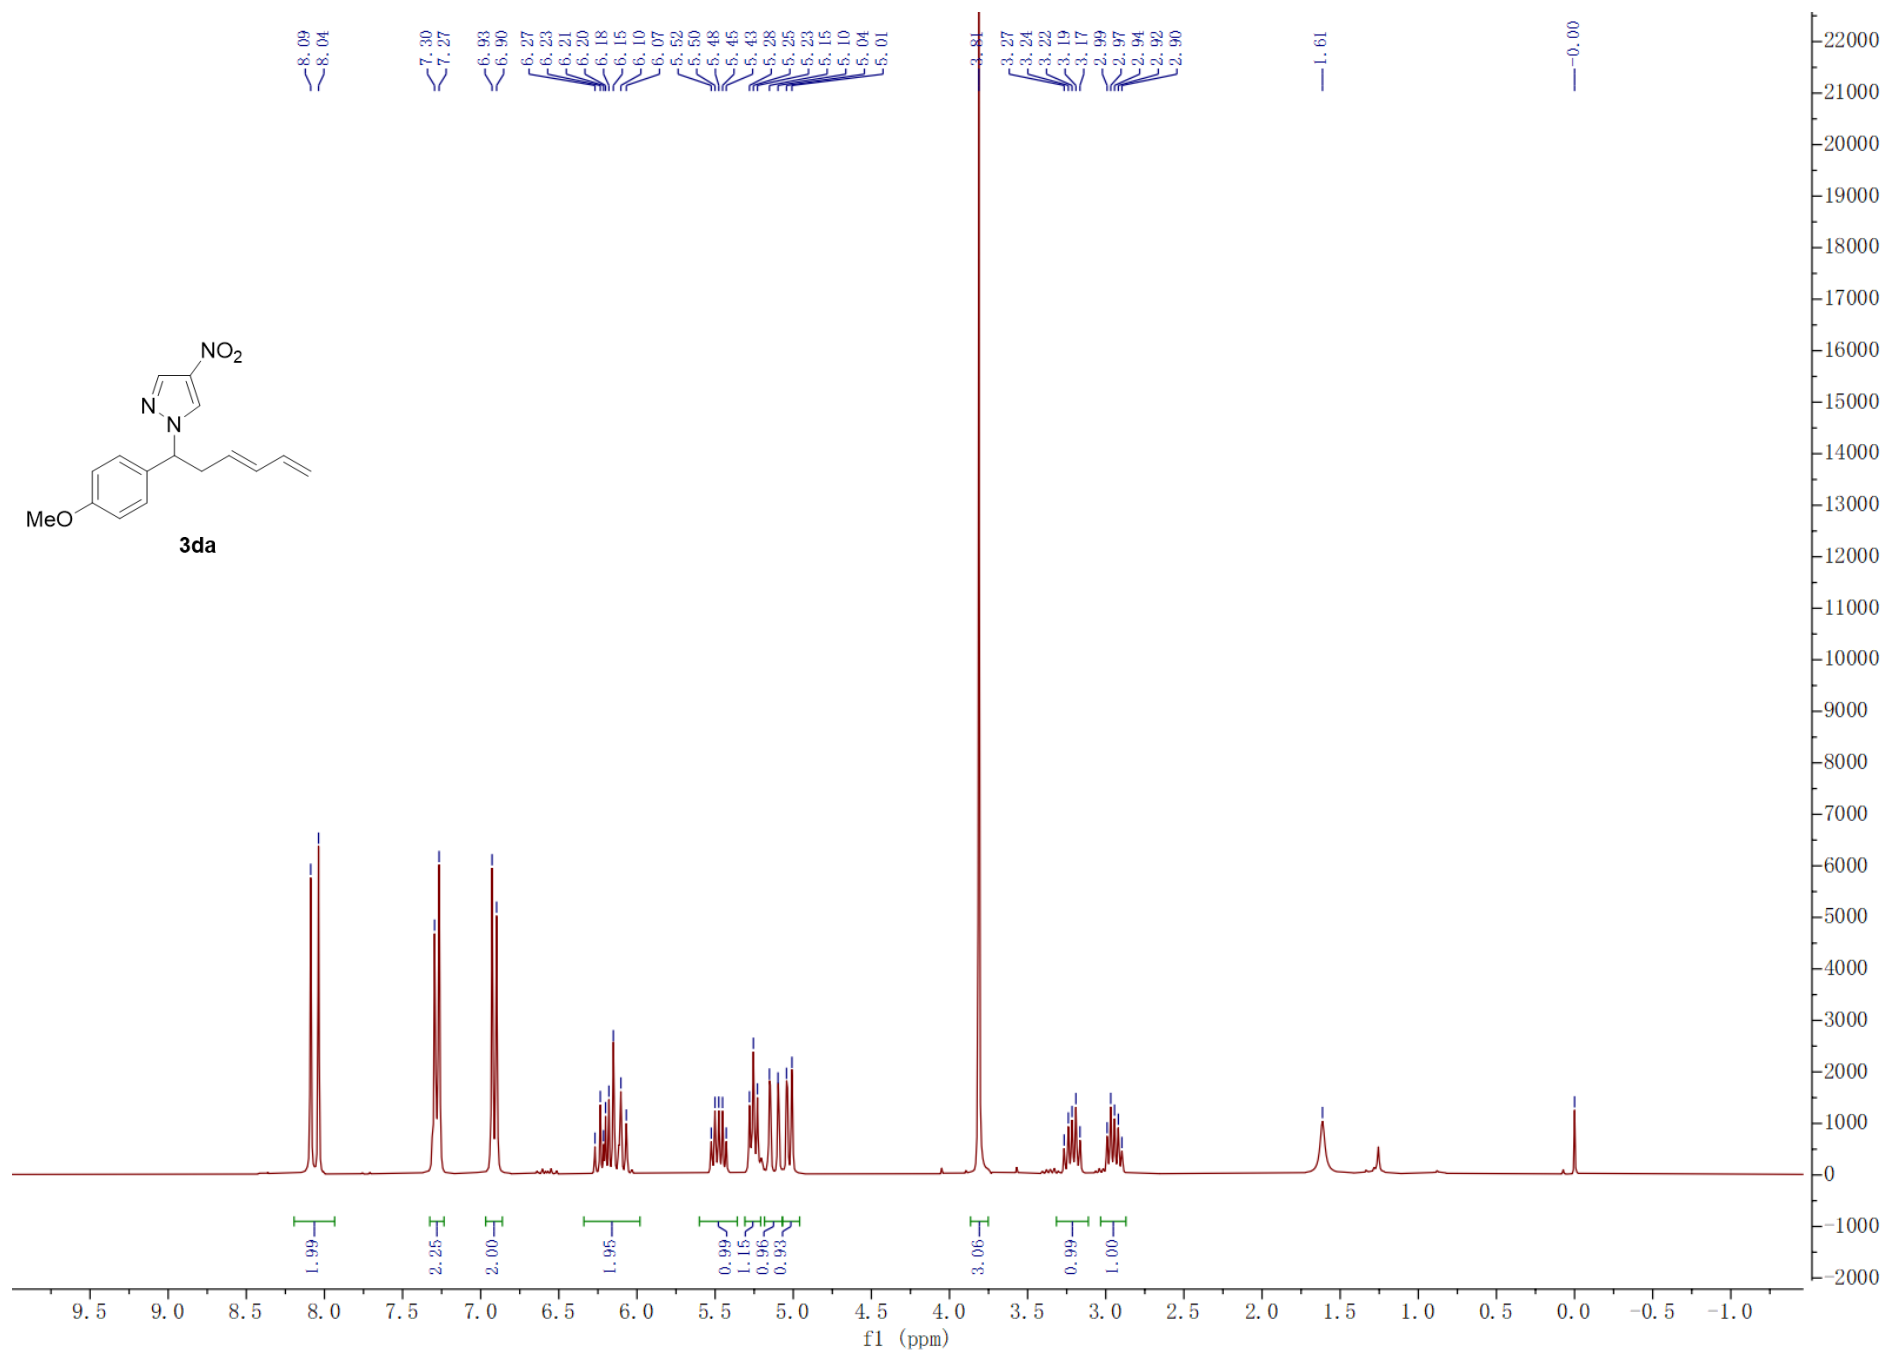

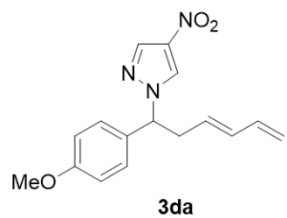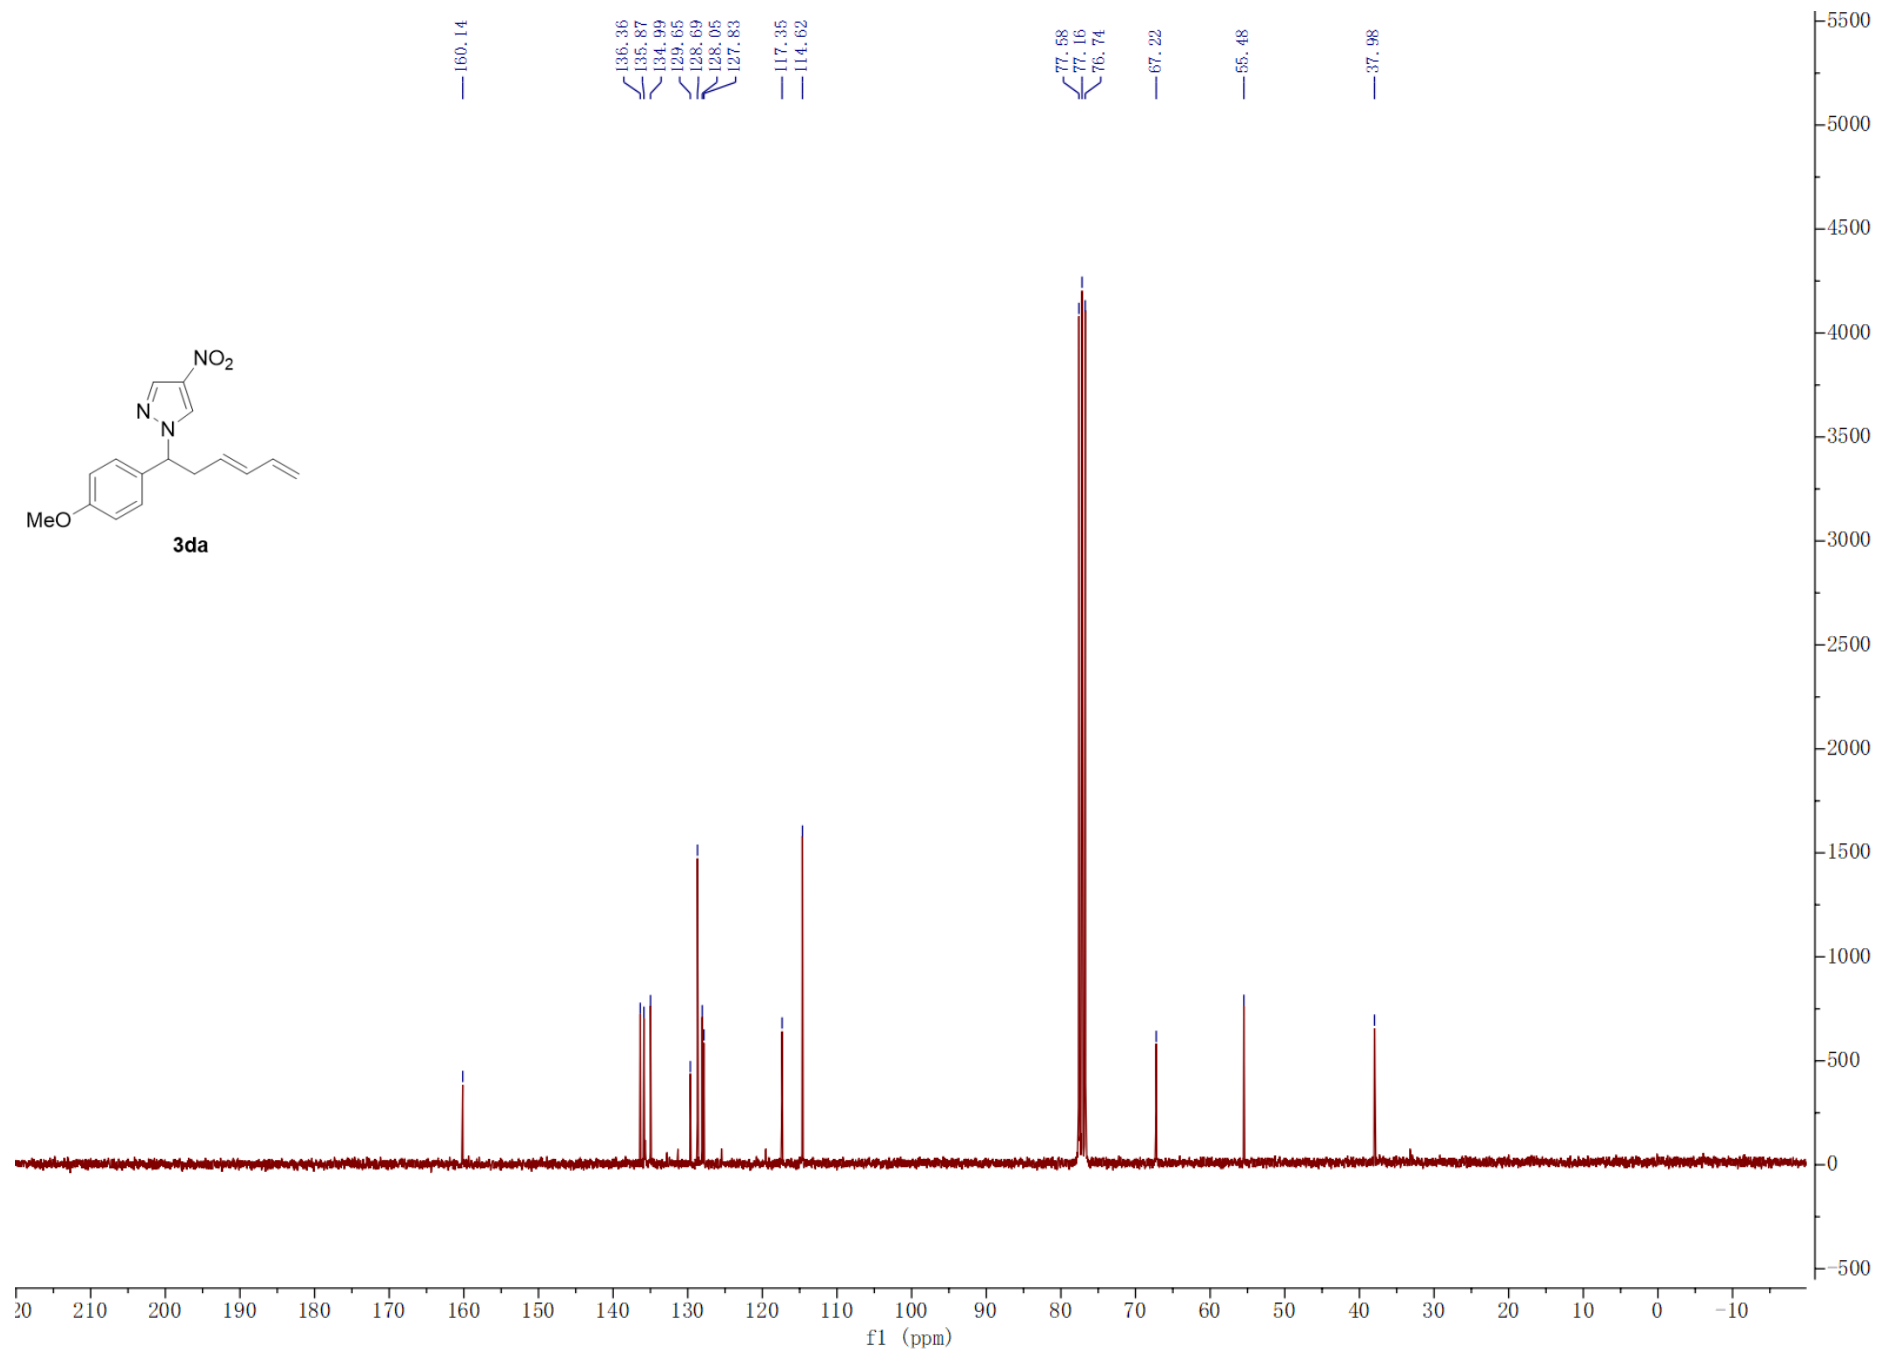

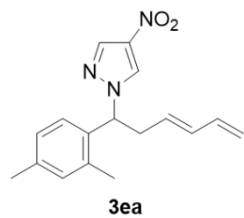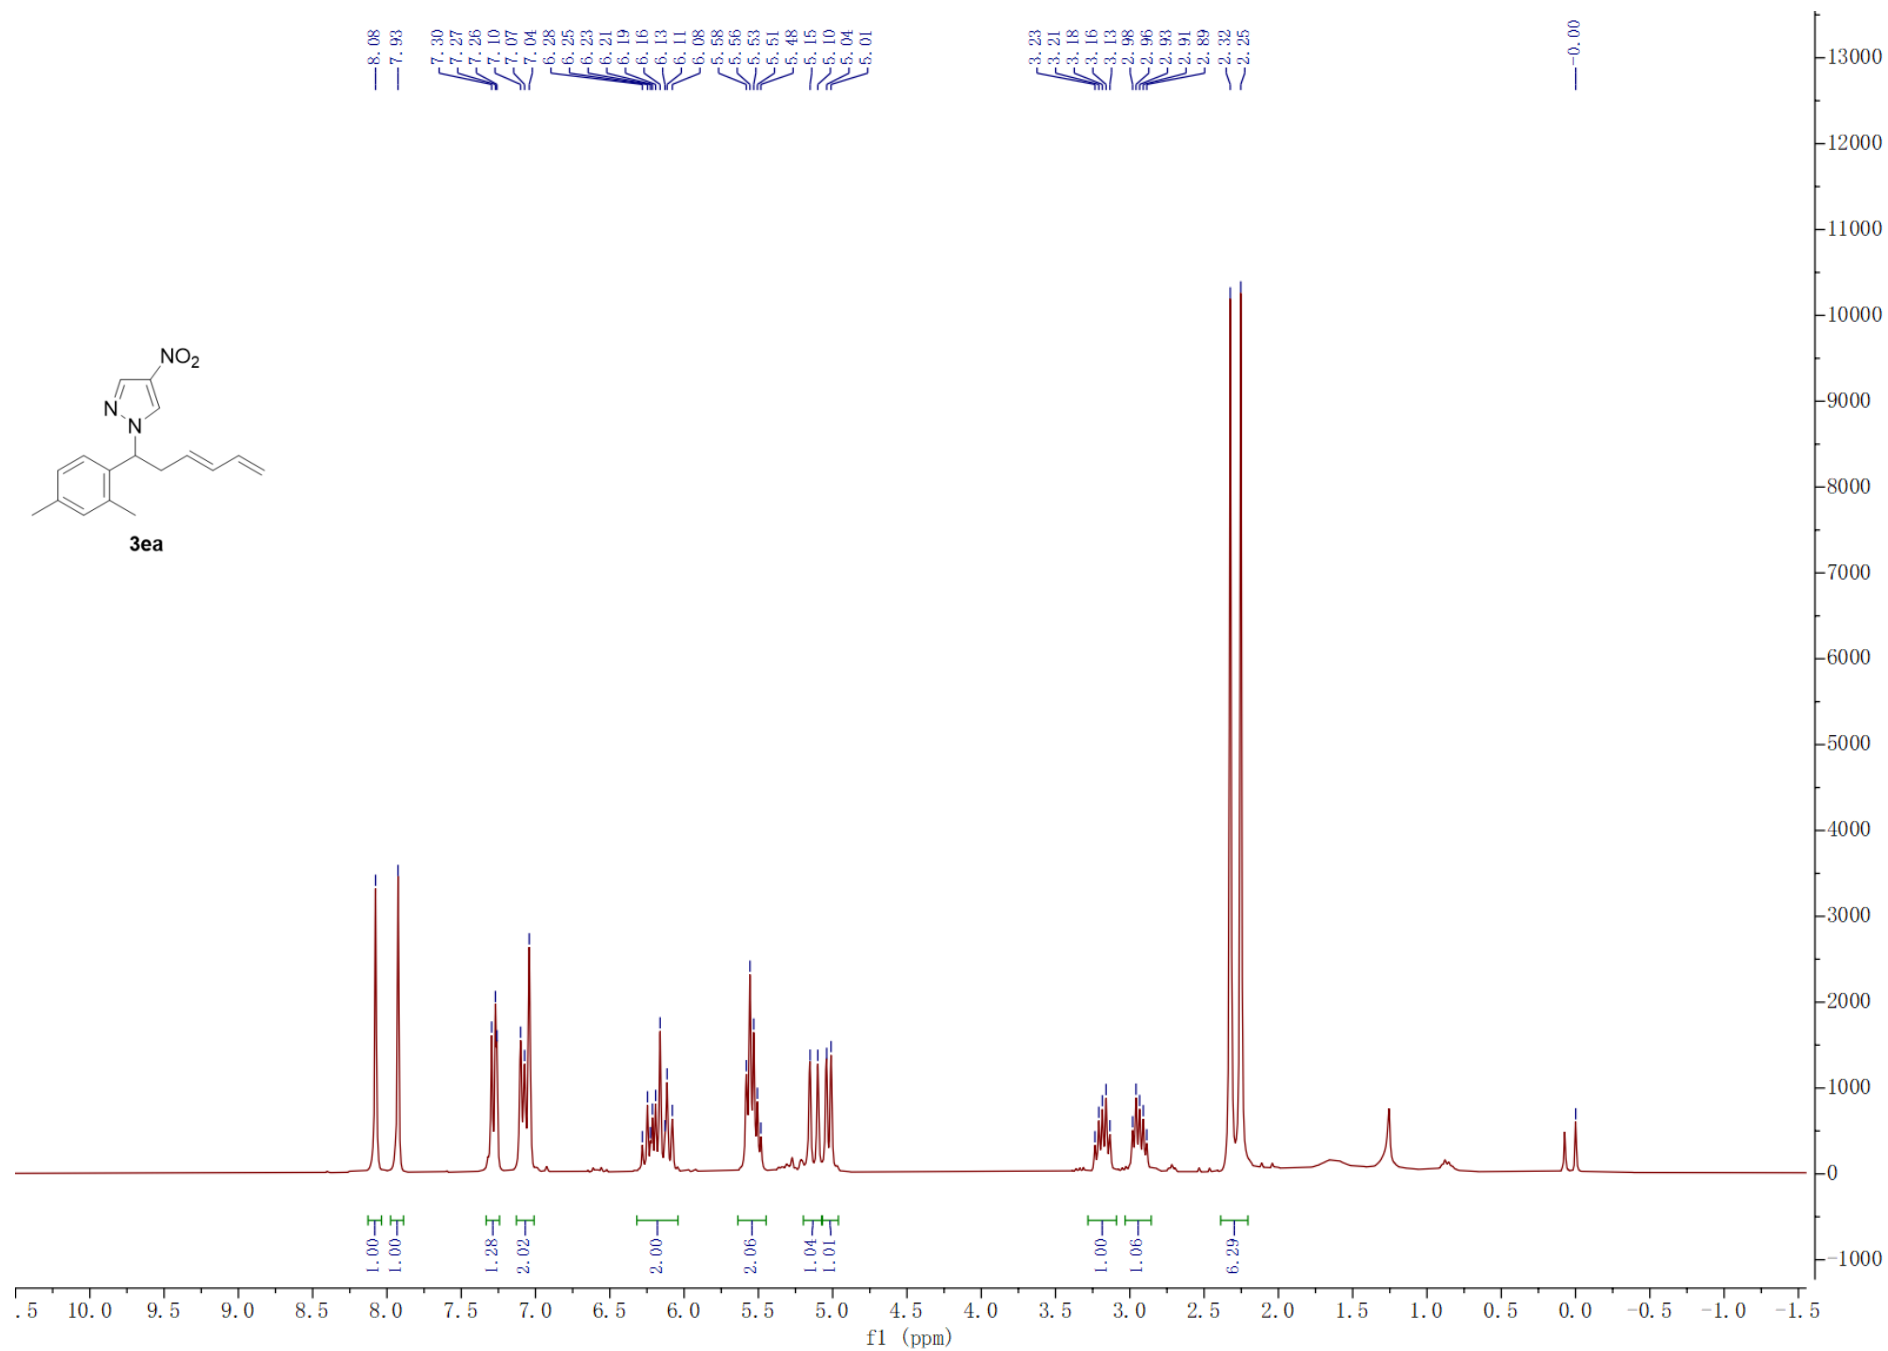

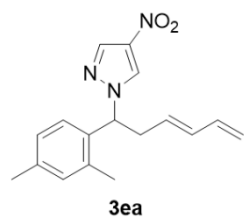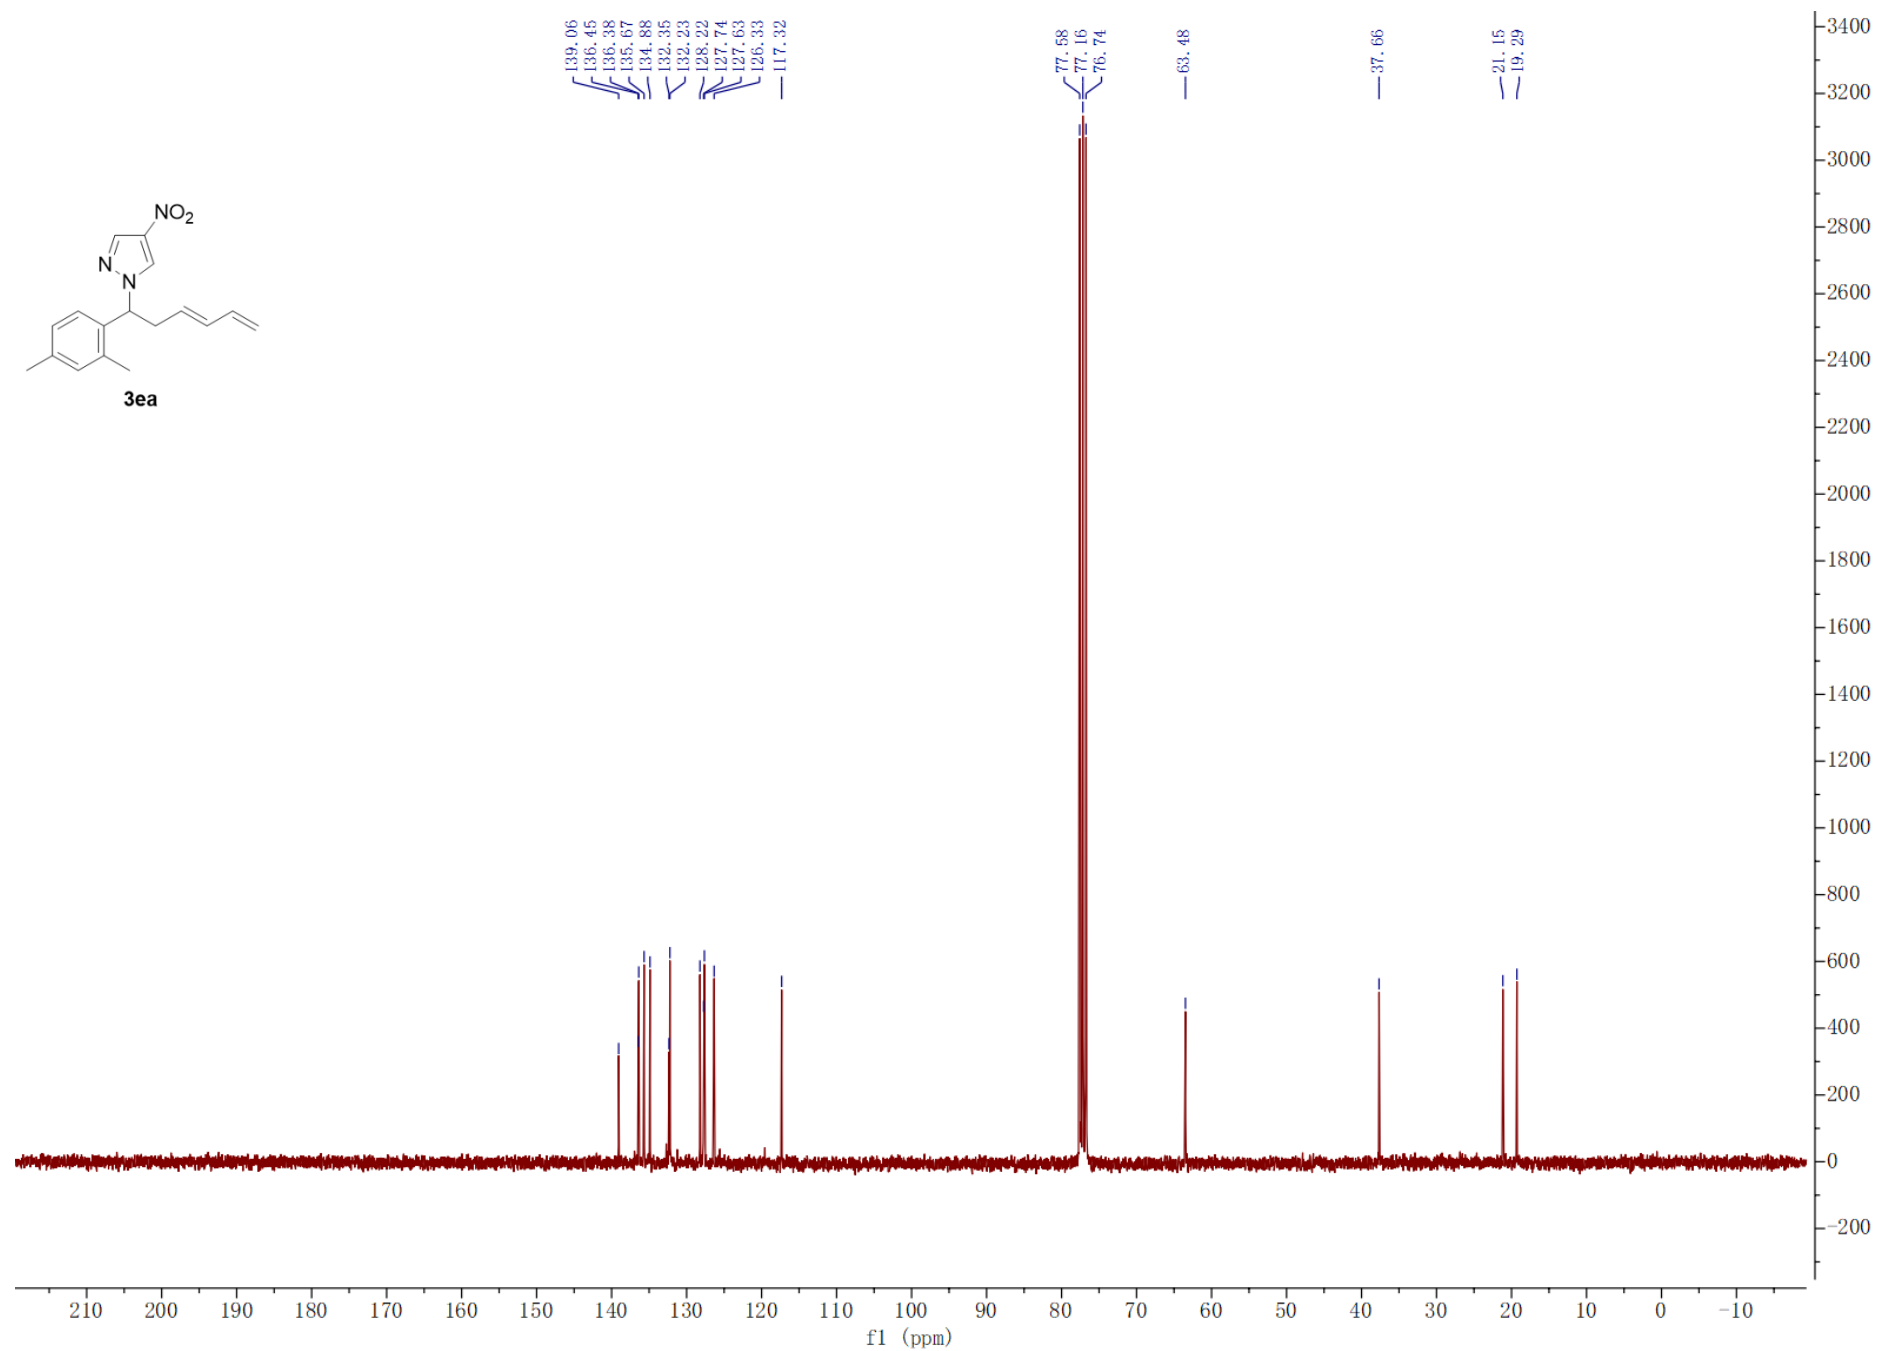



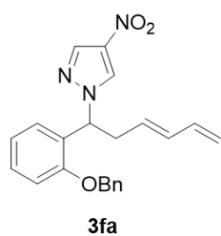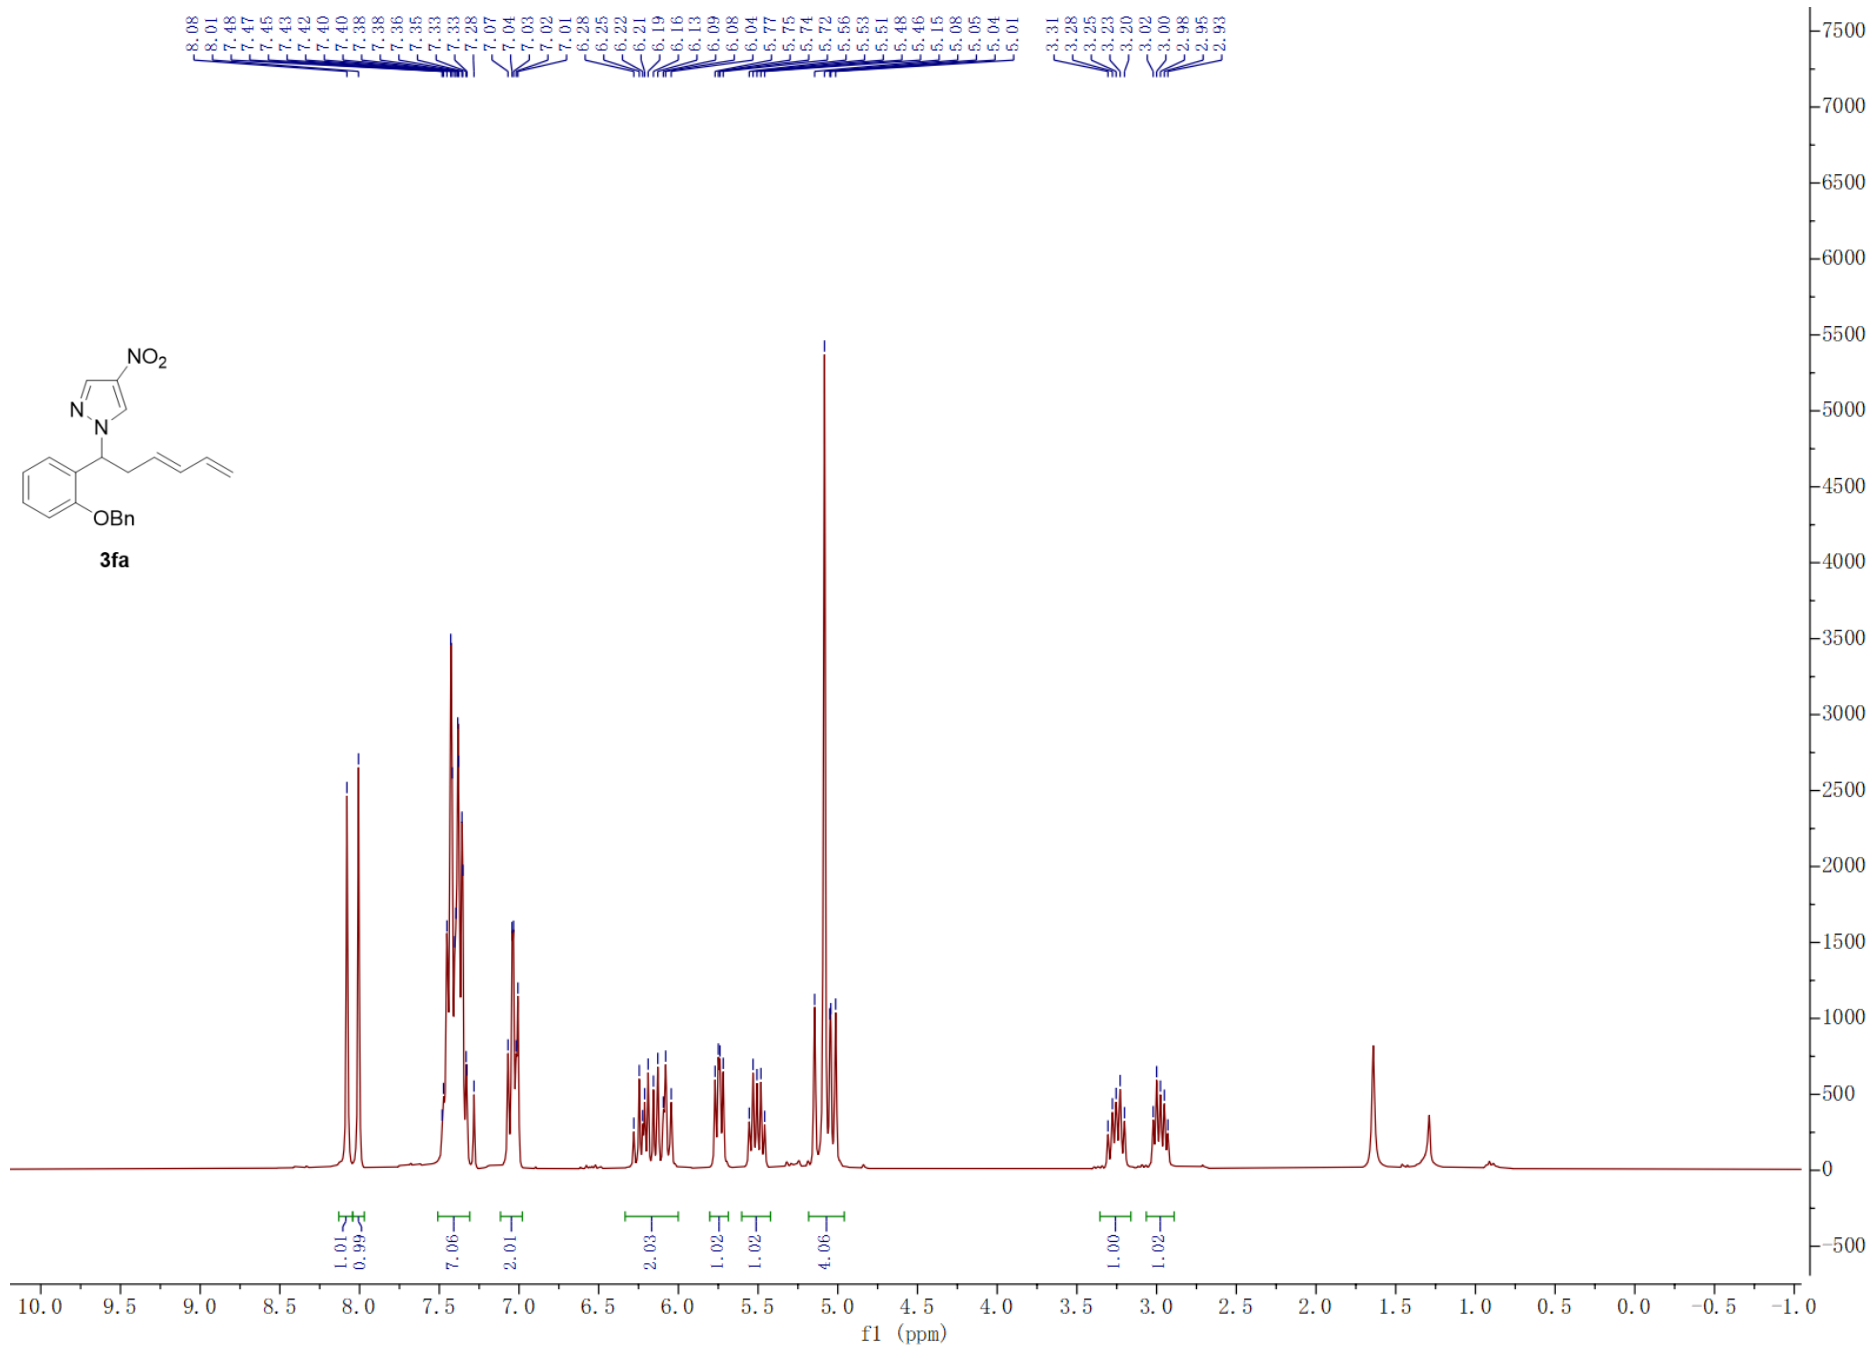

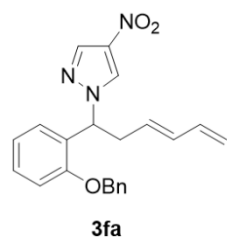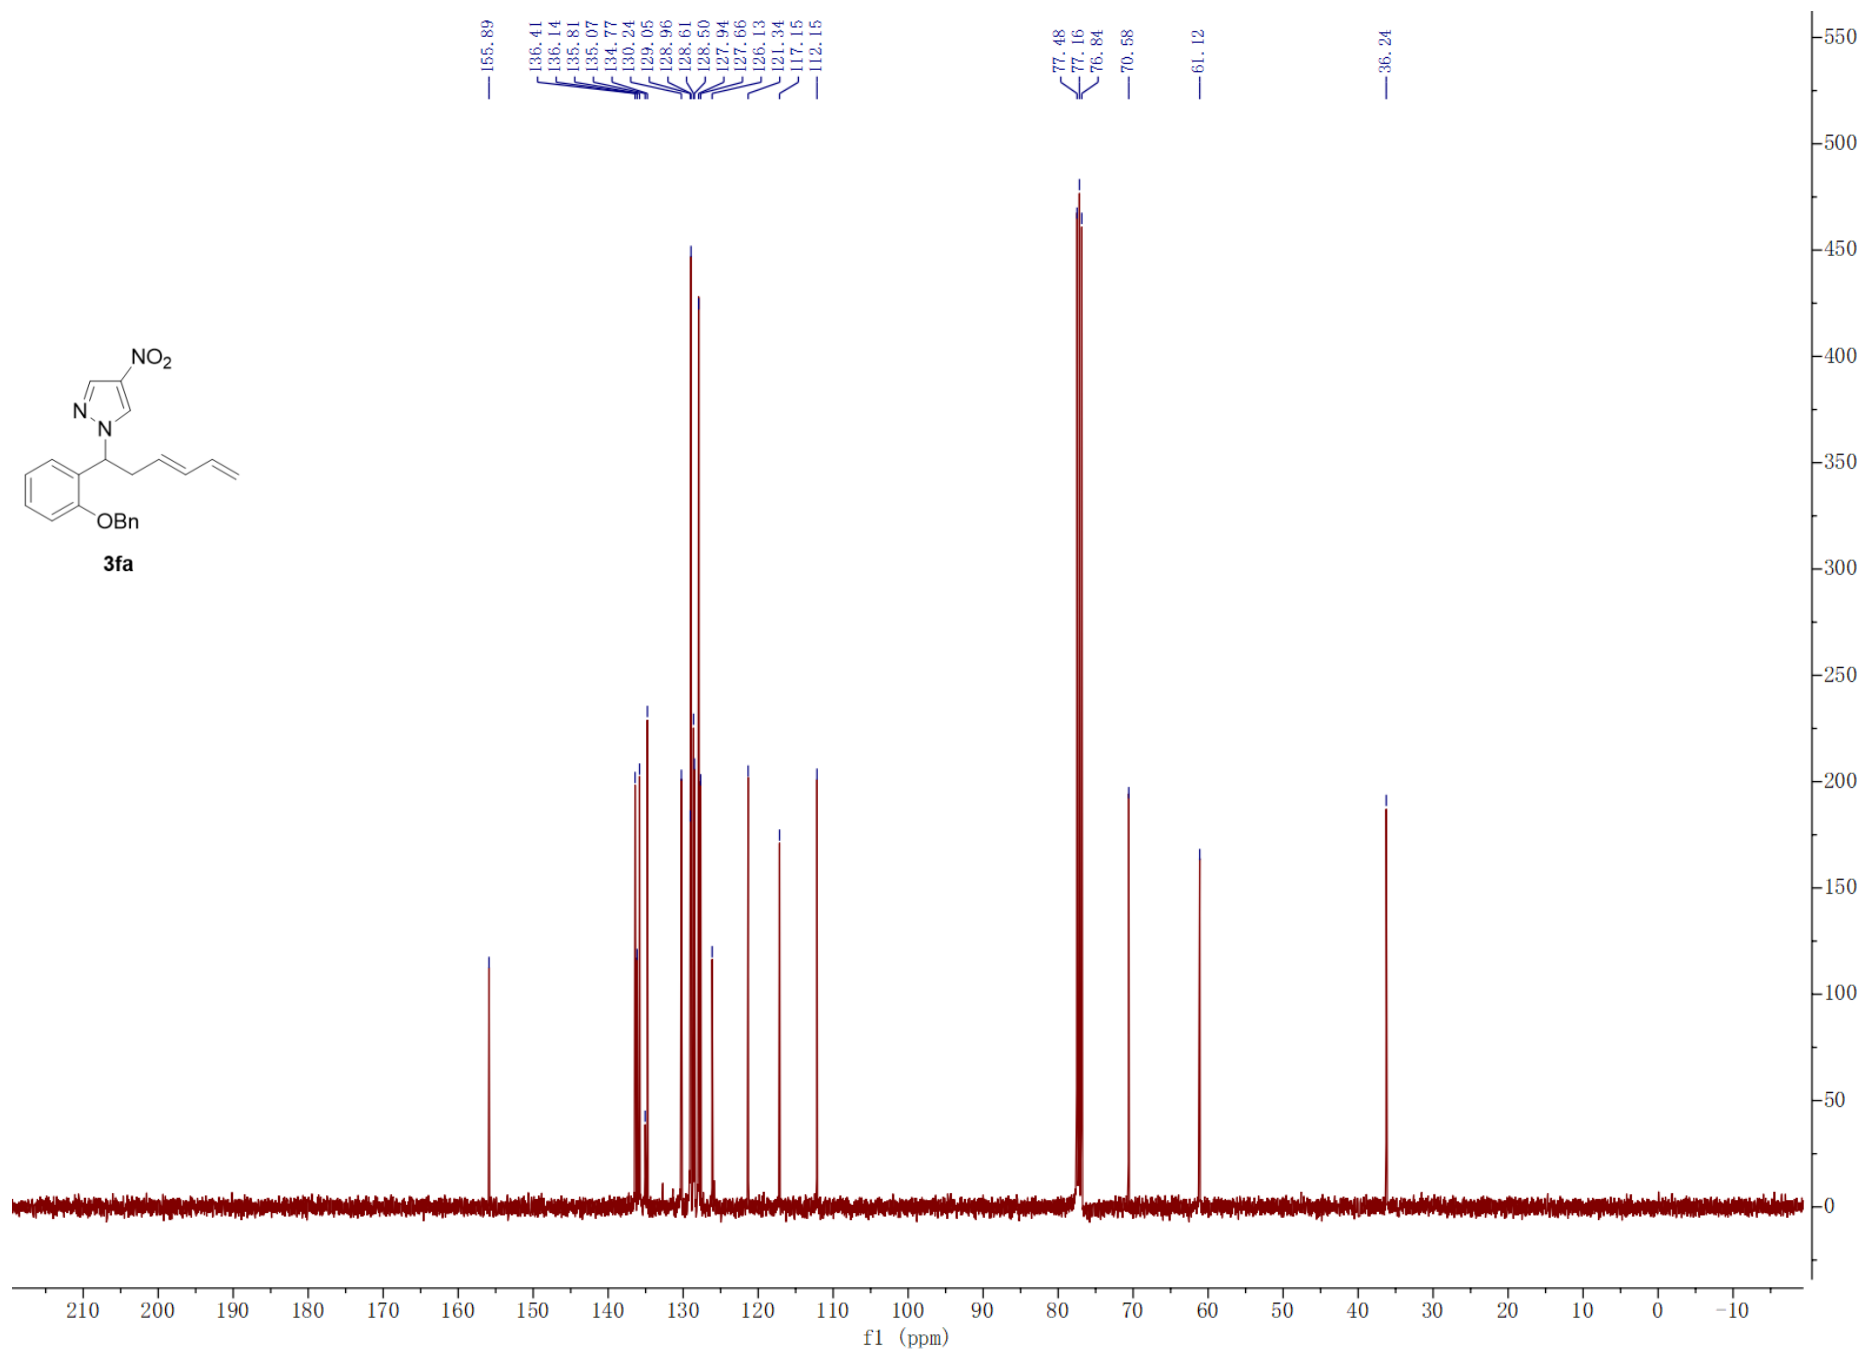

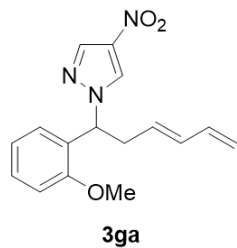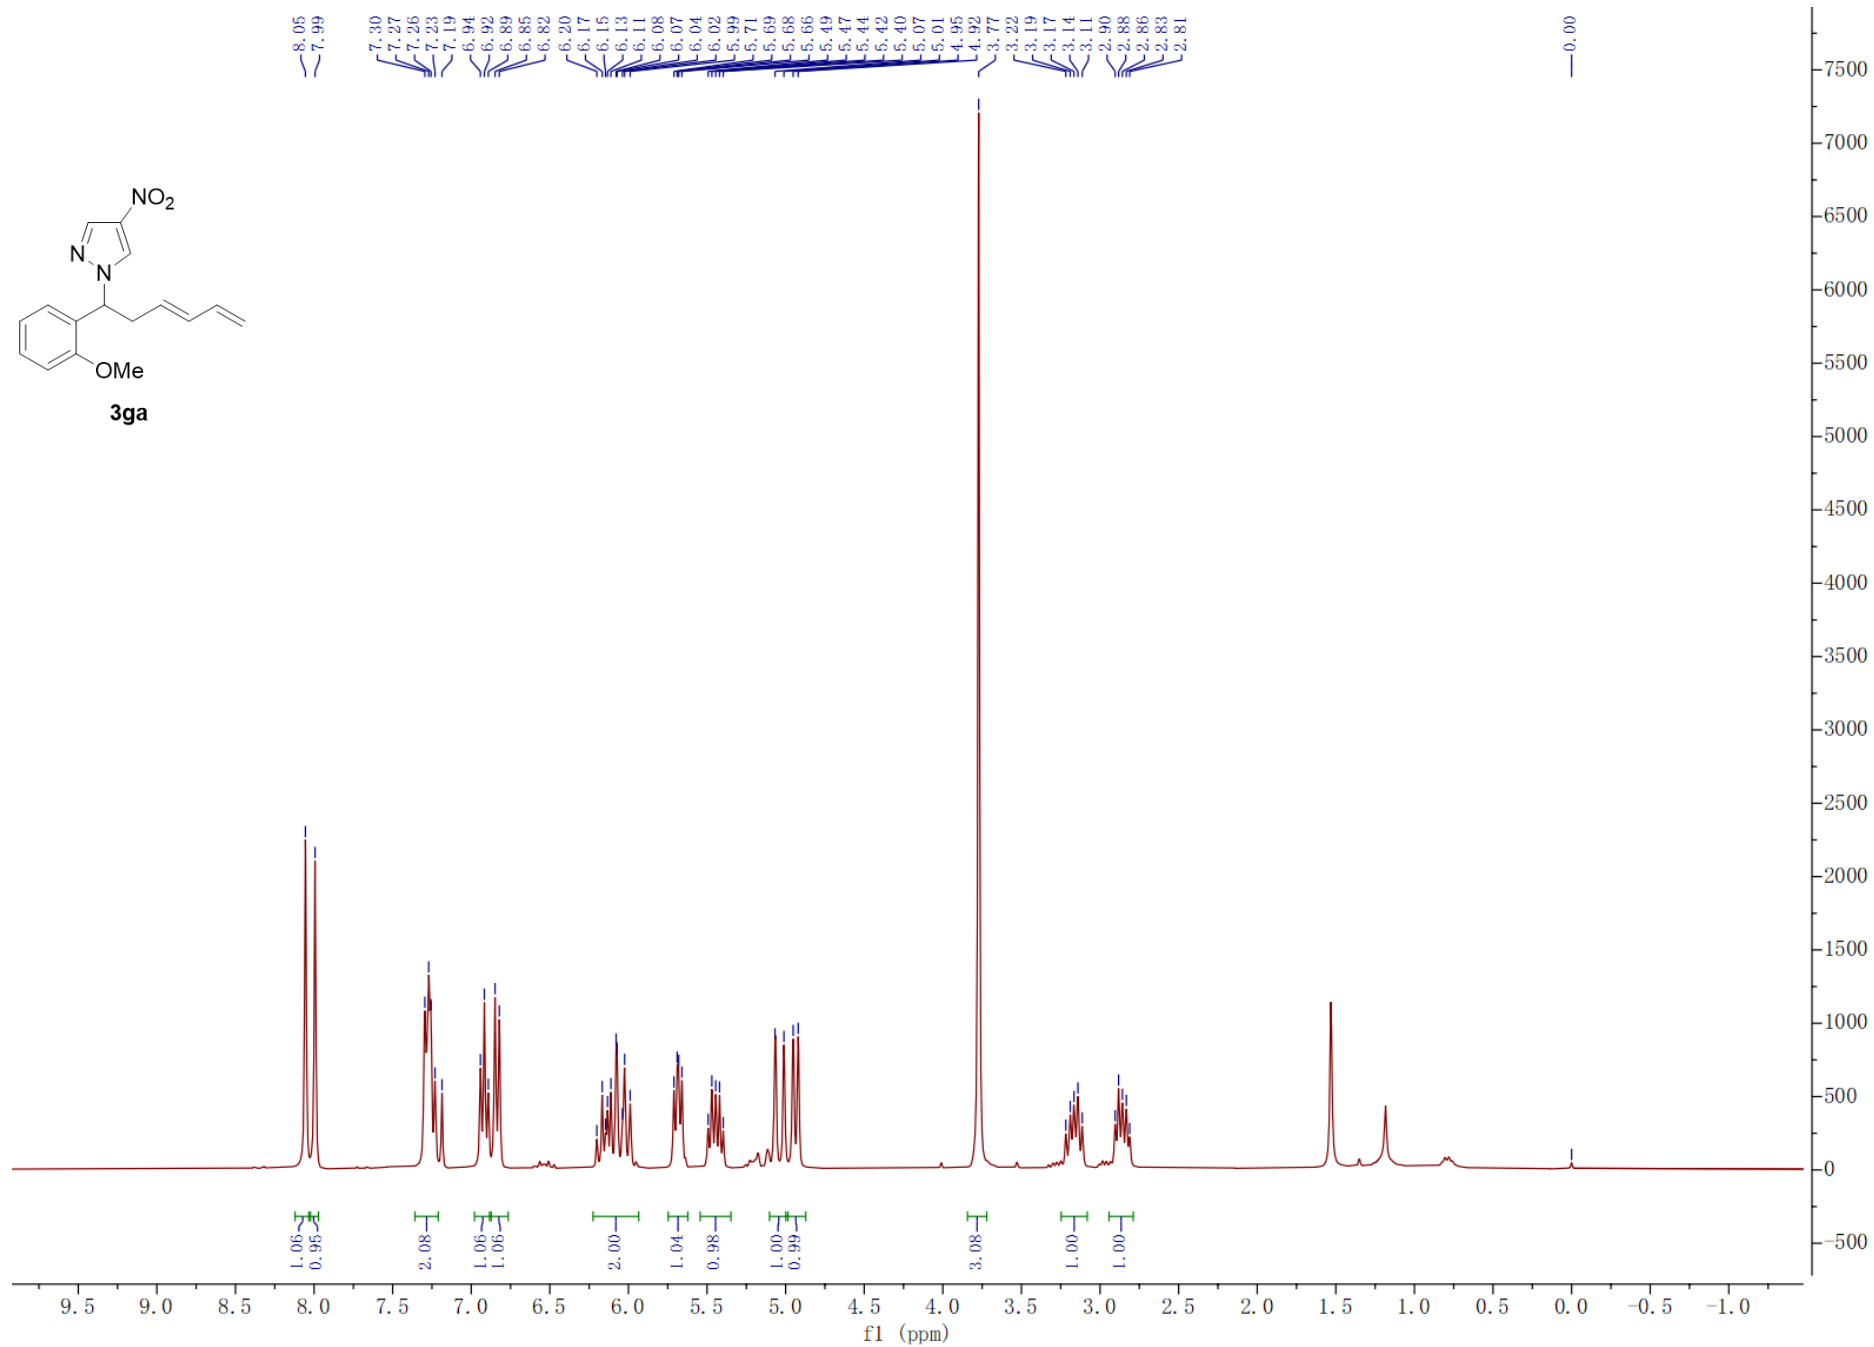

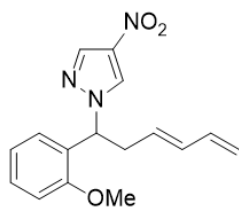

**3ga**

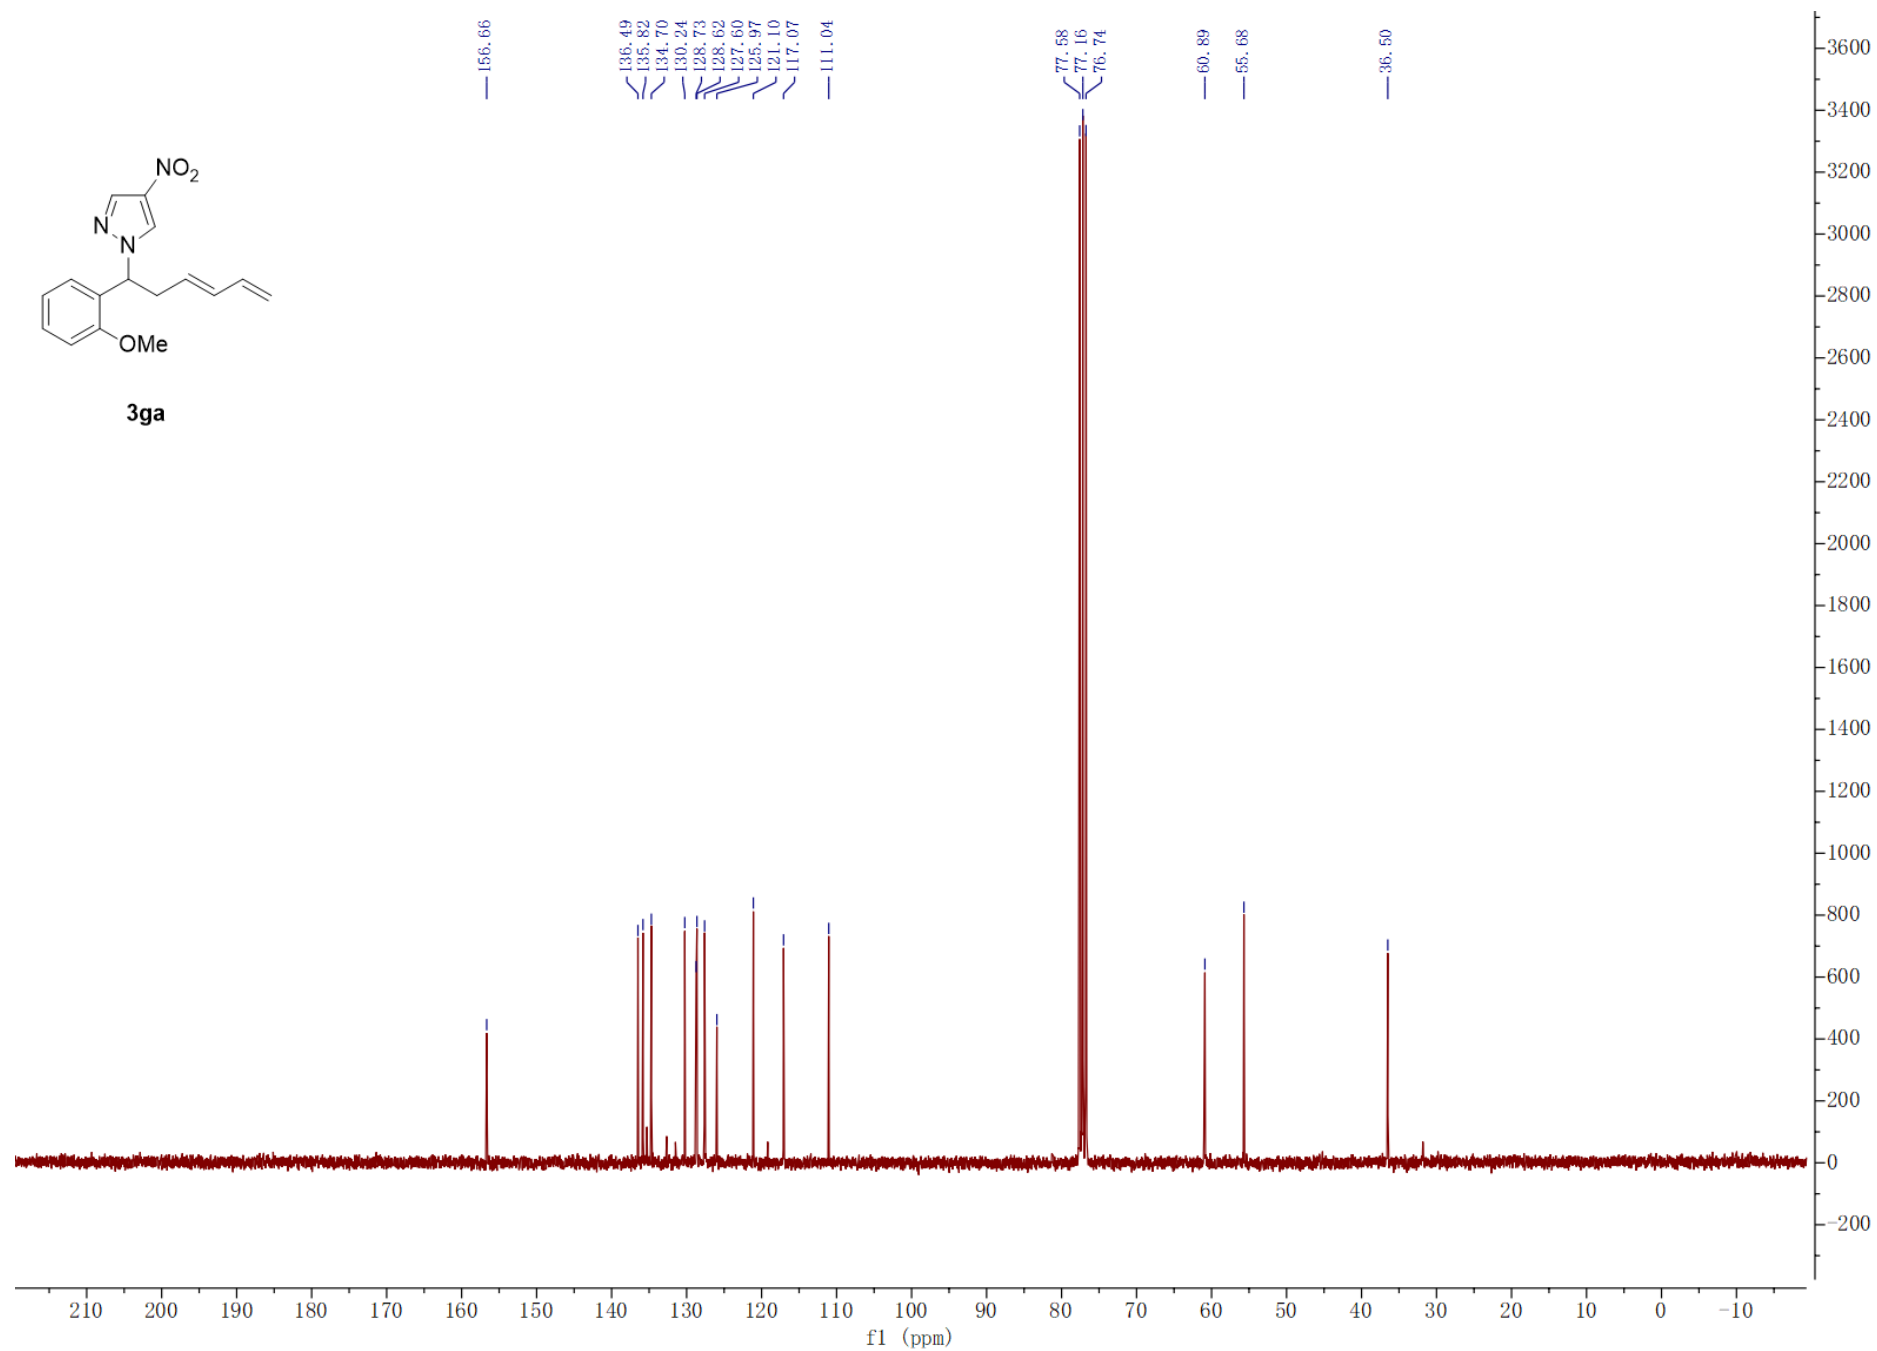

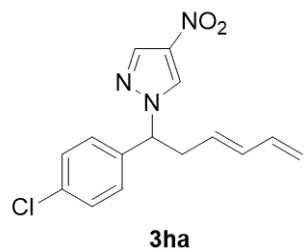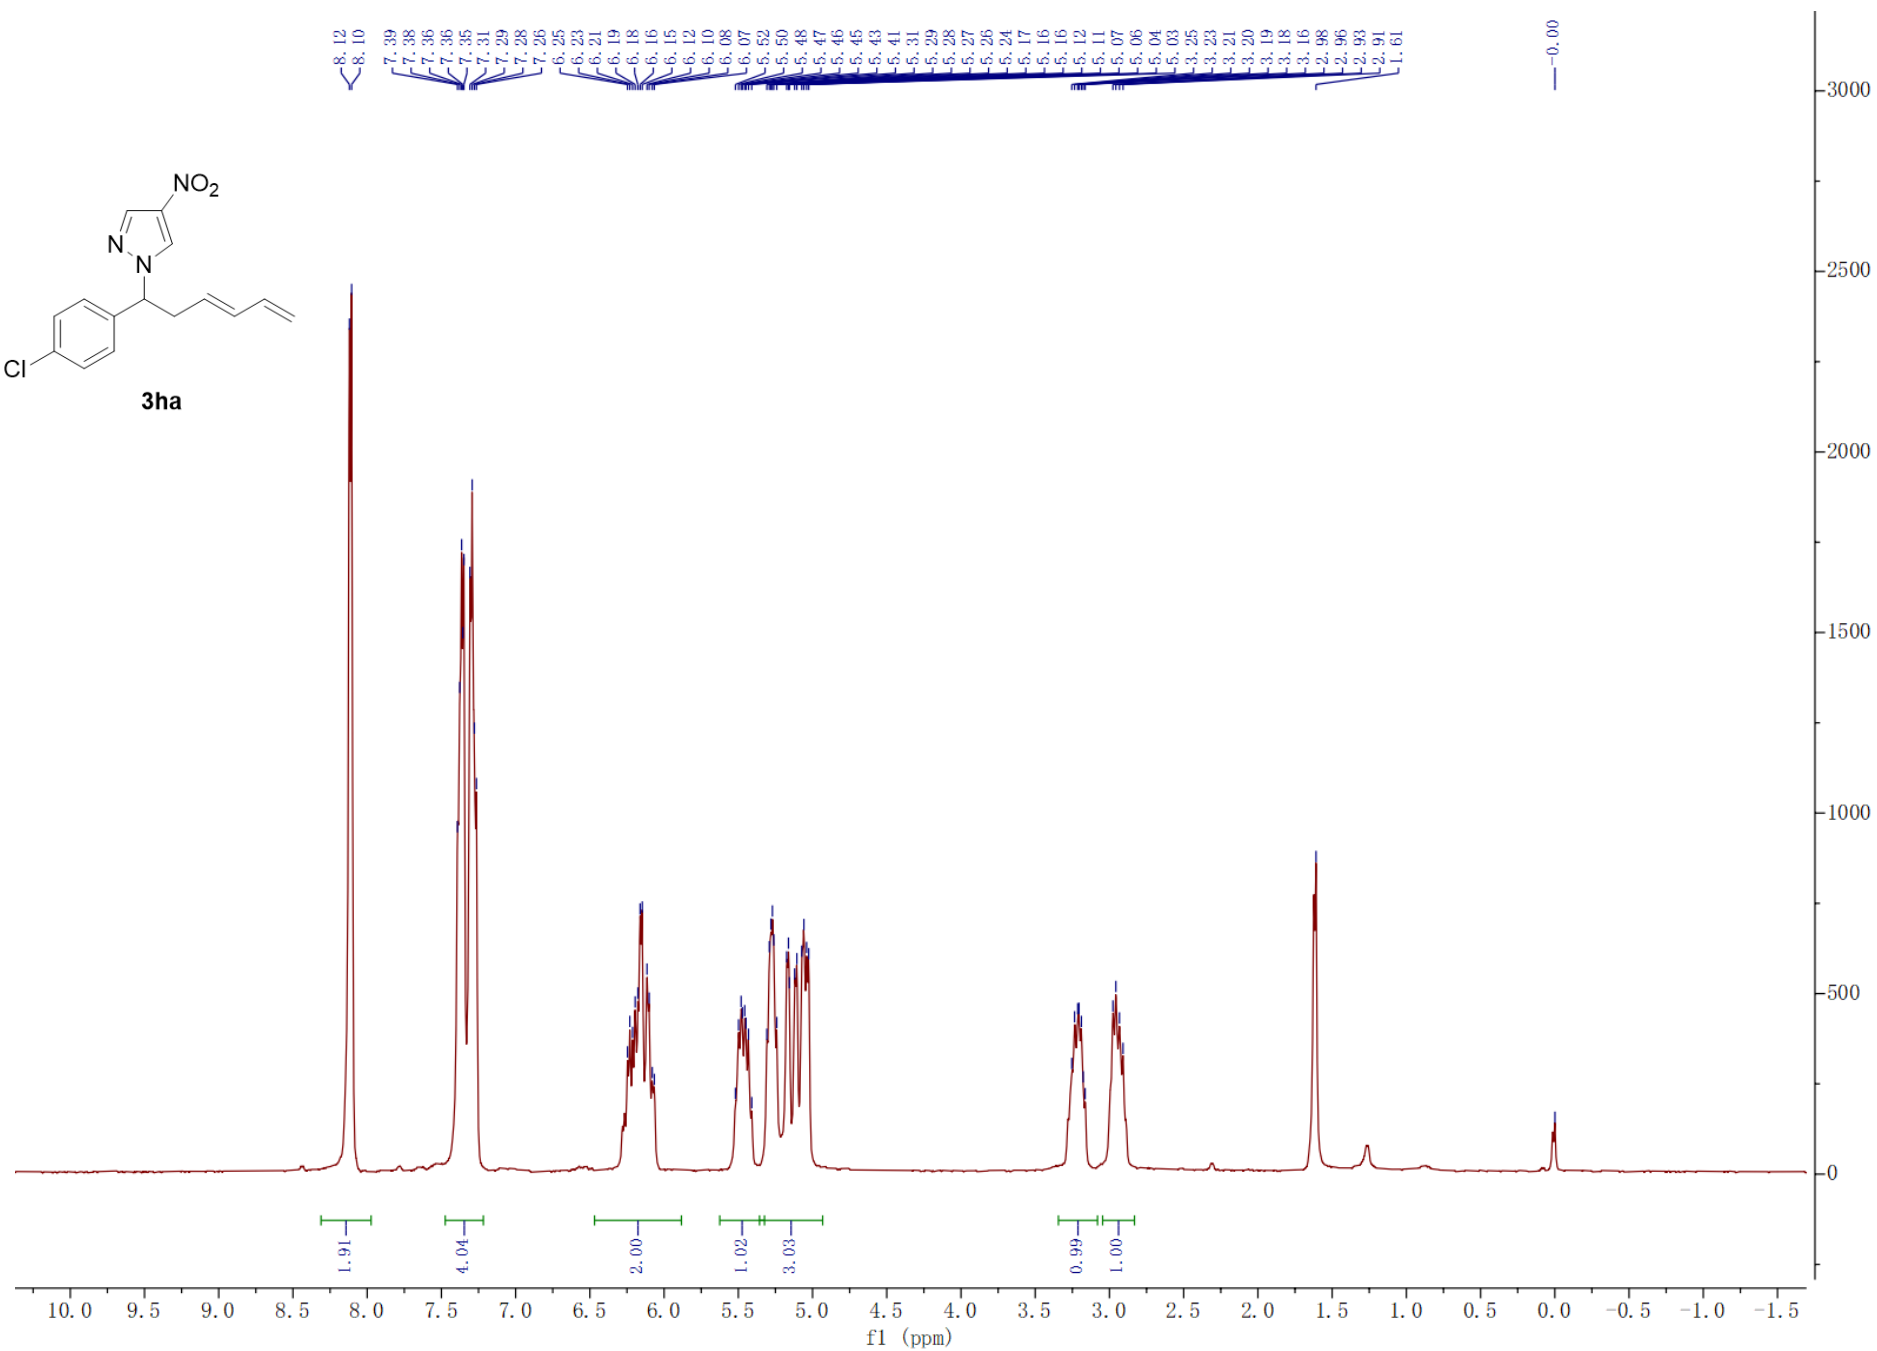

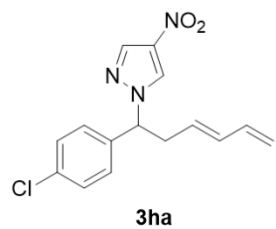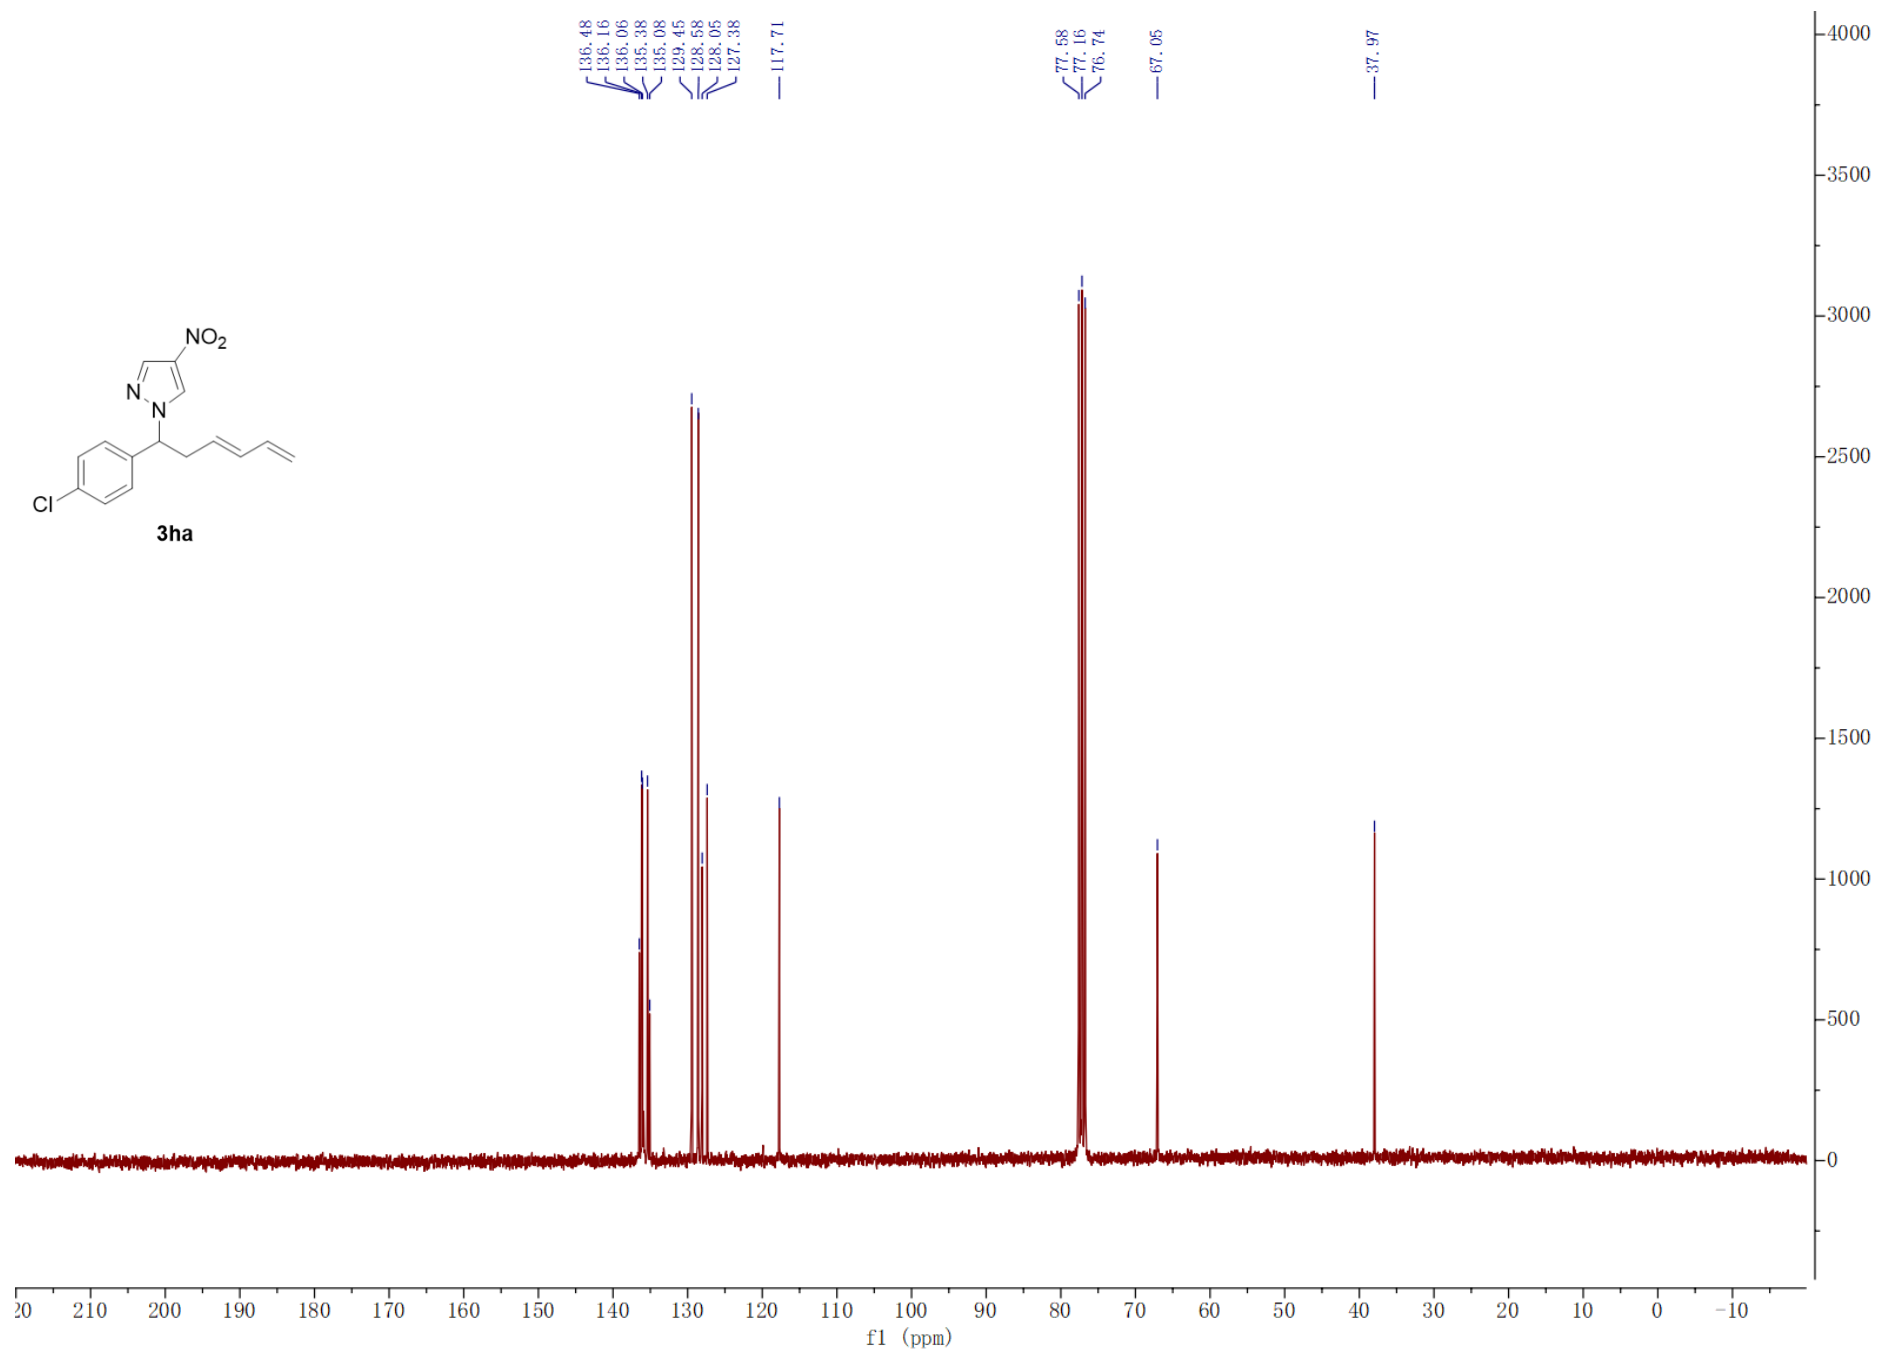

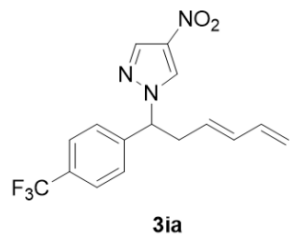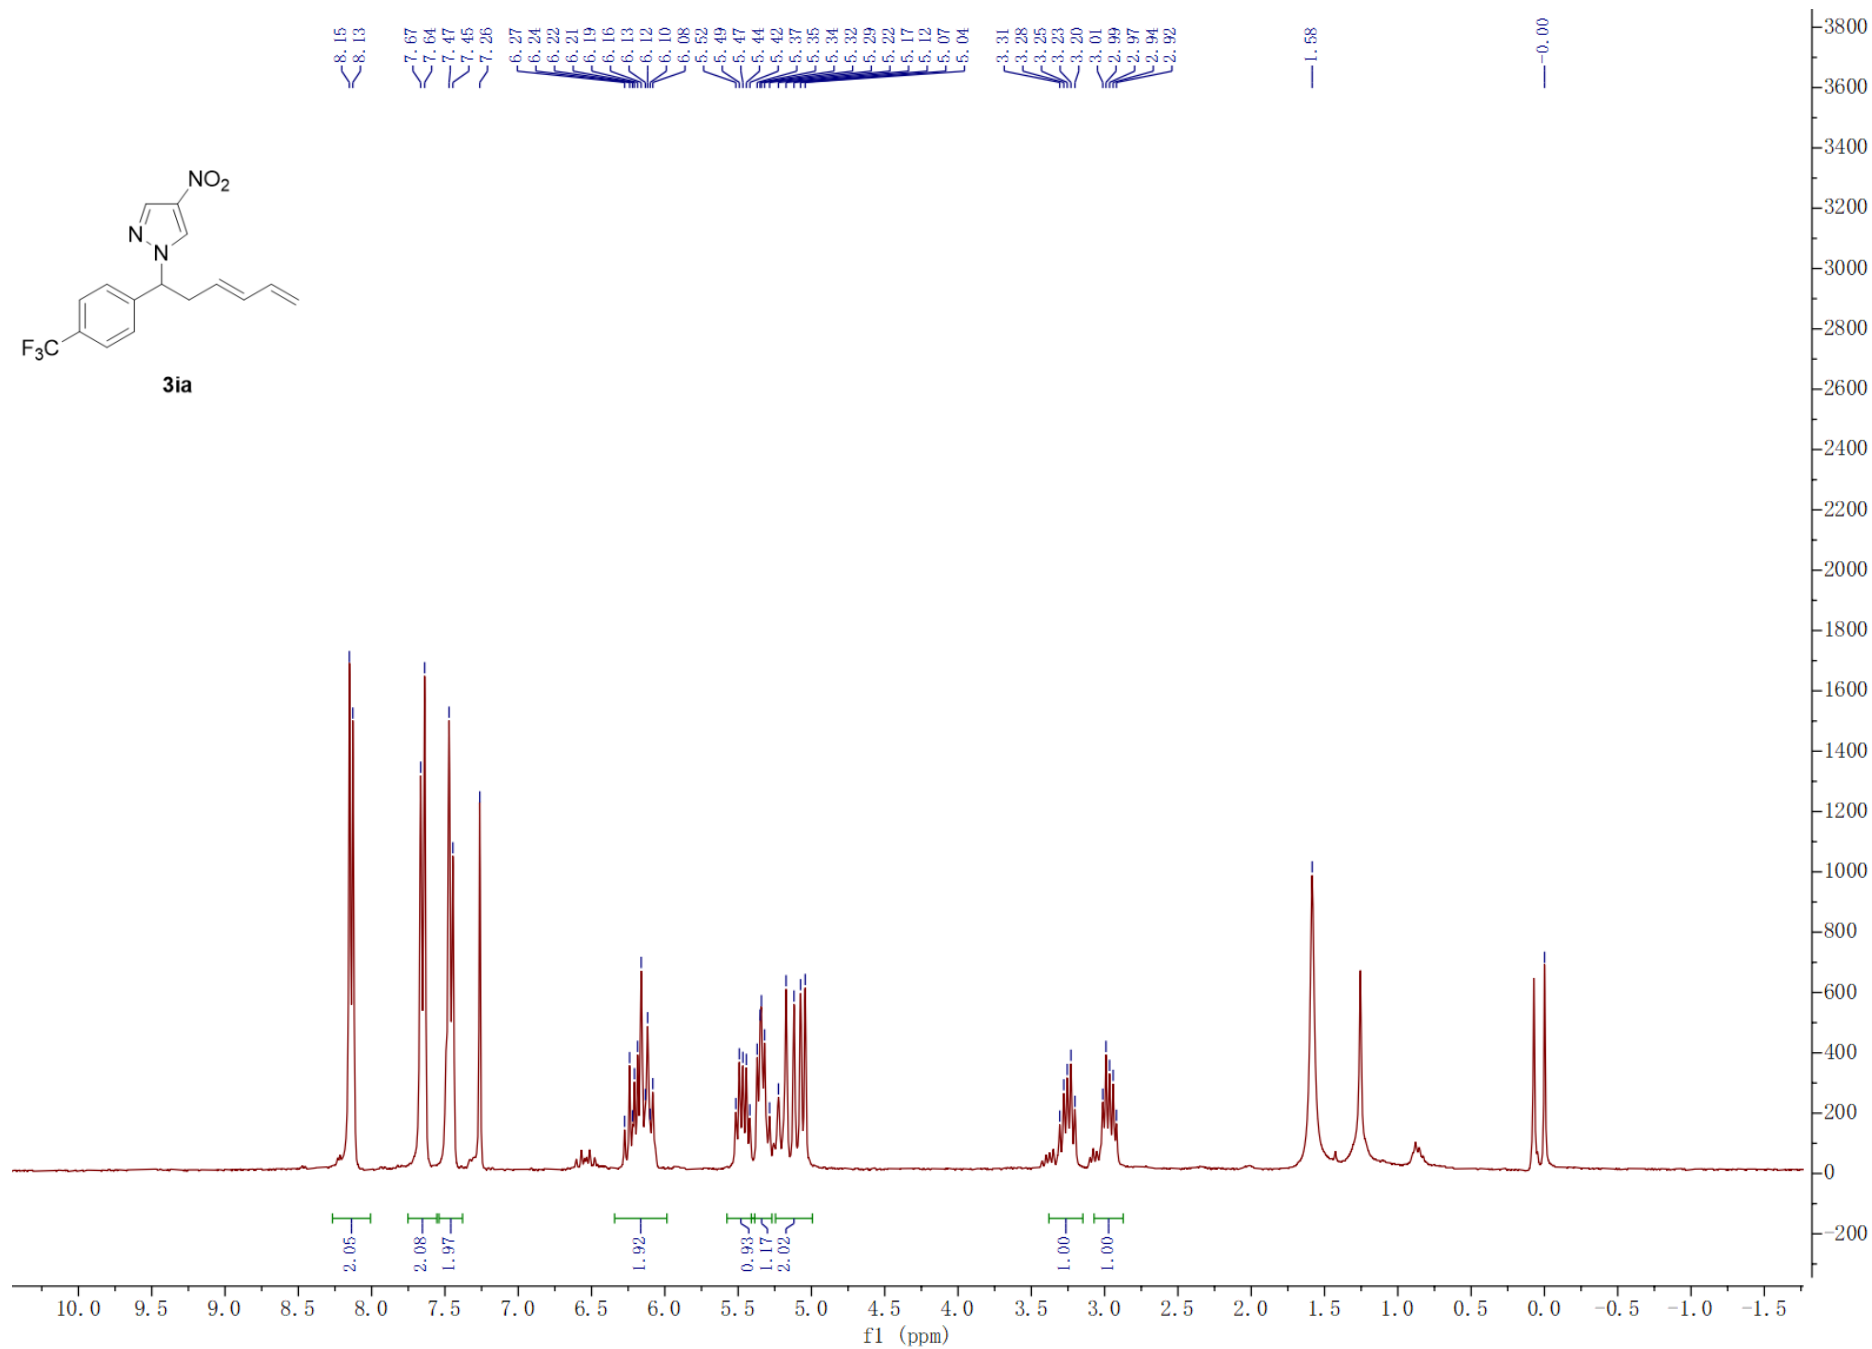

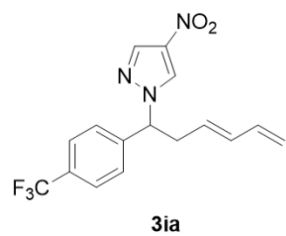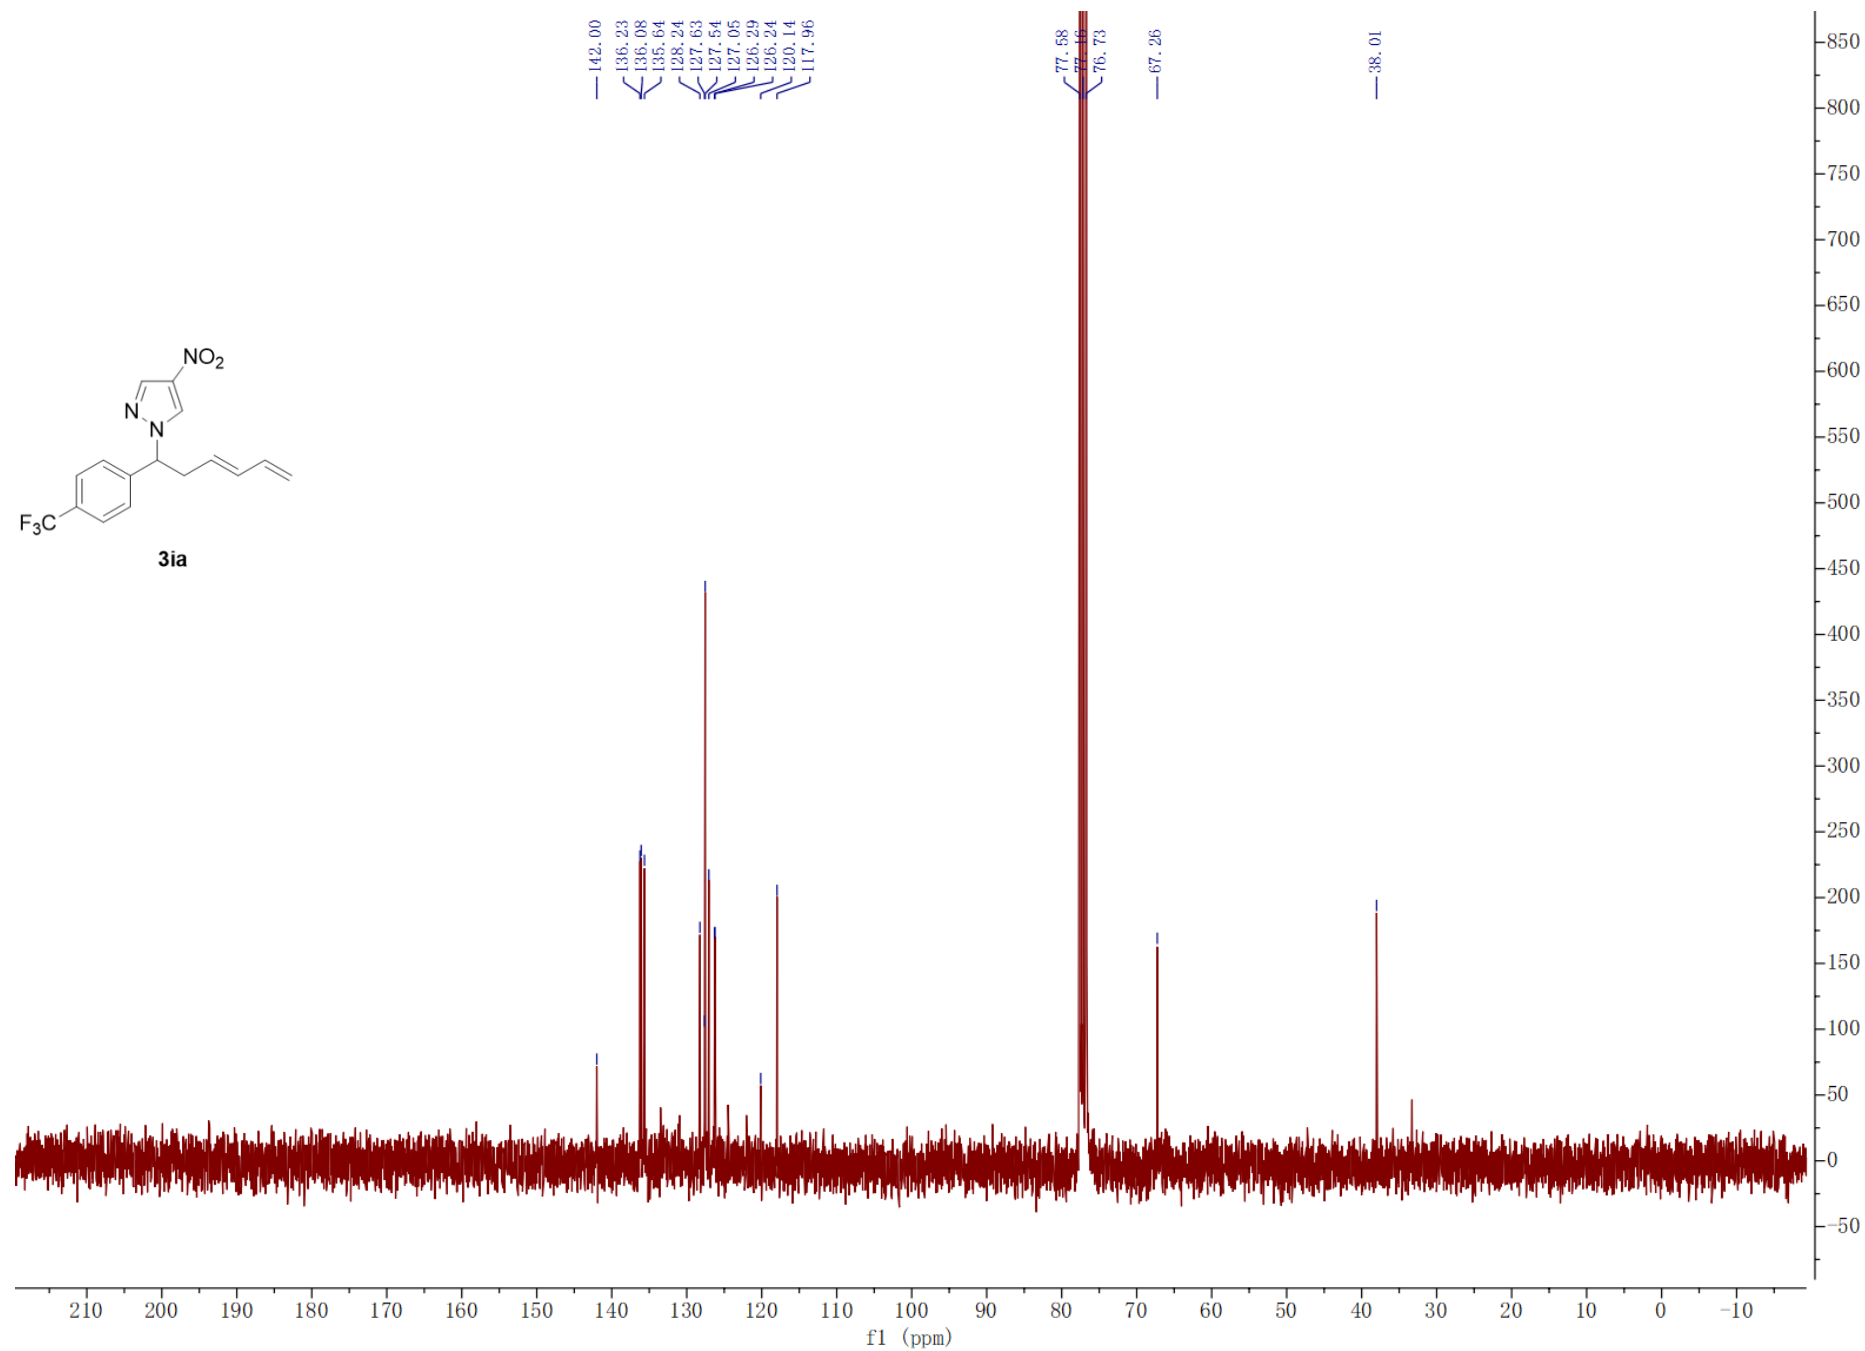



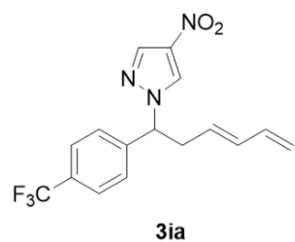

— 62.80

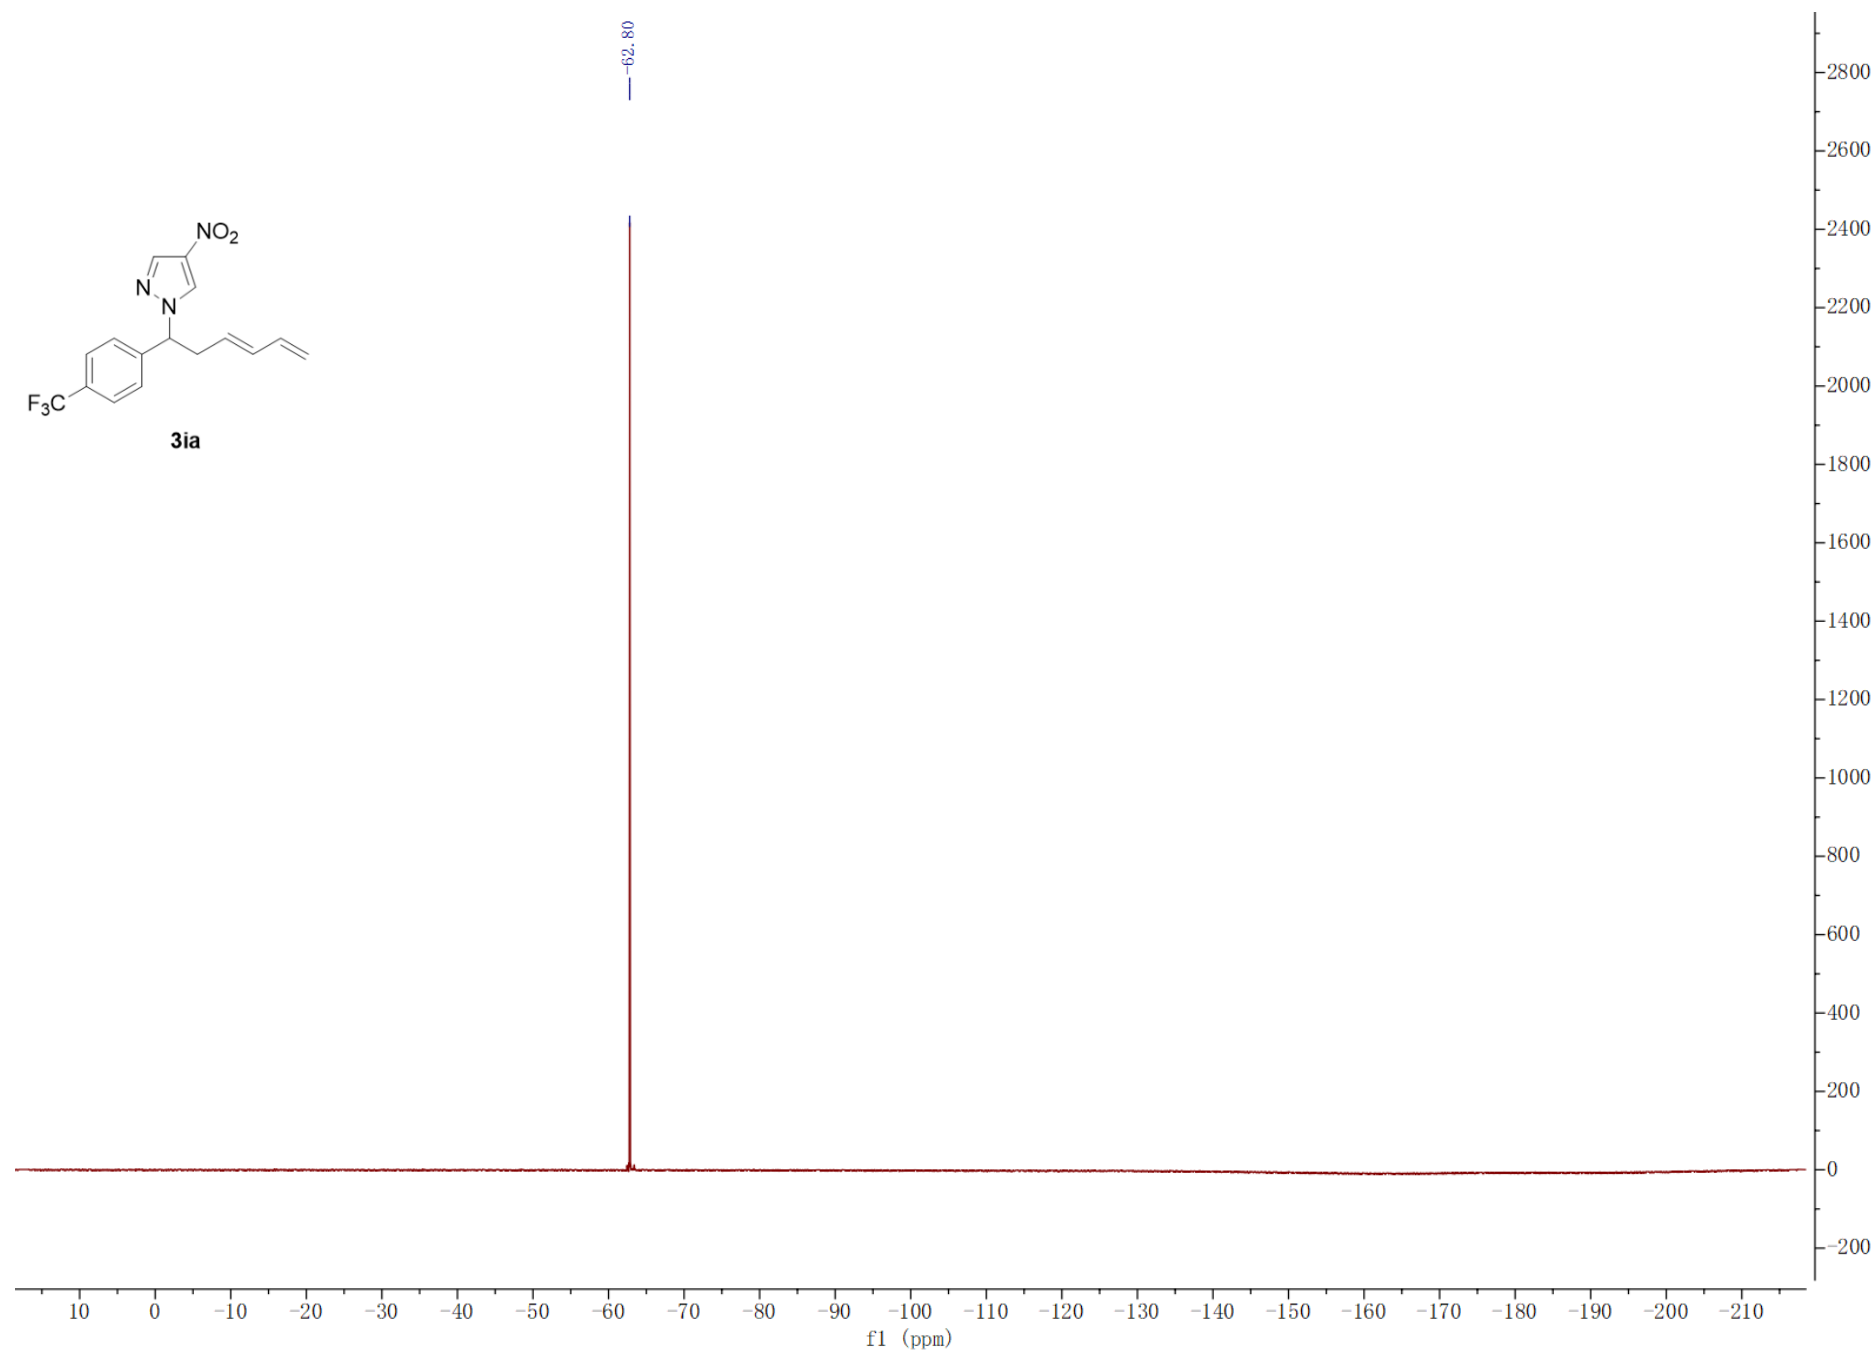

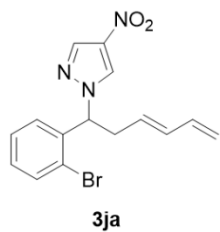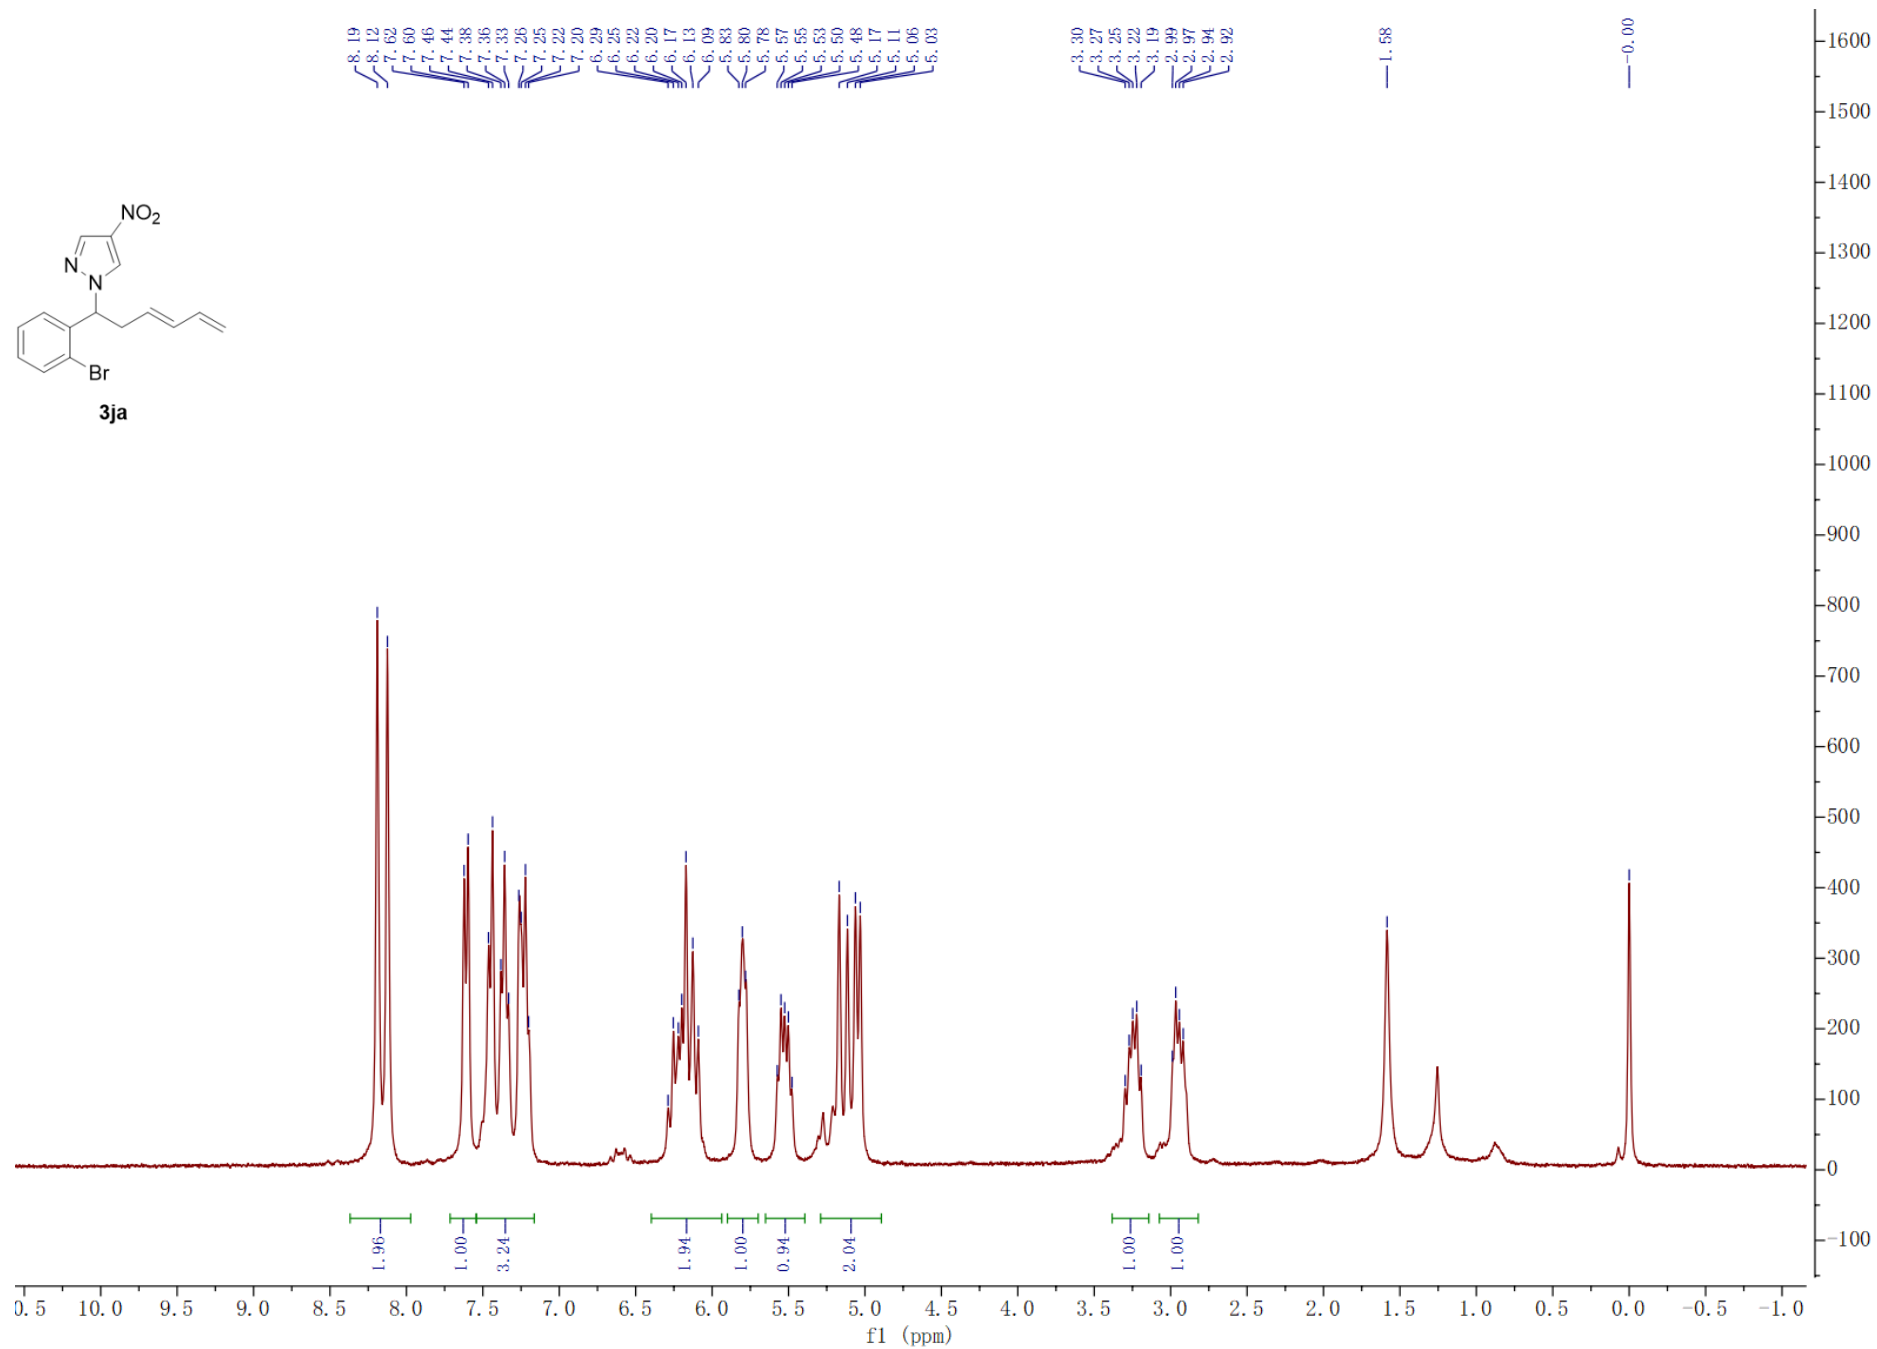

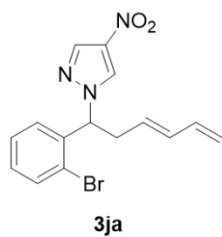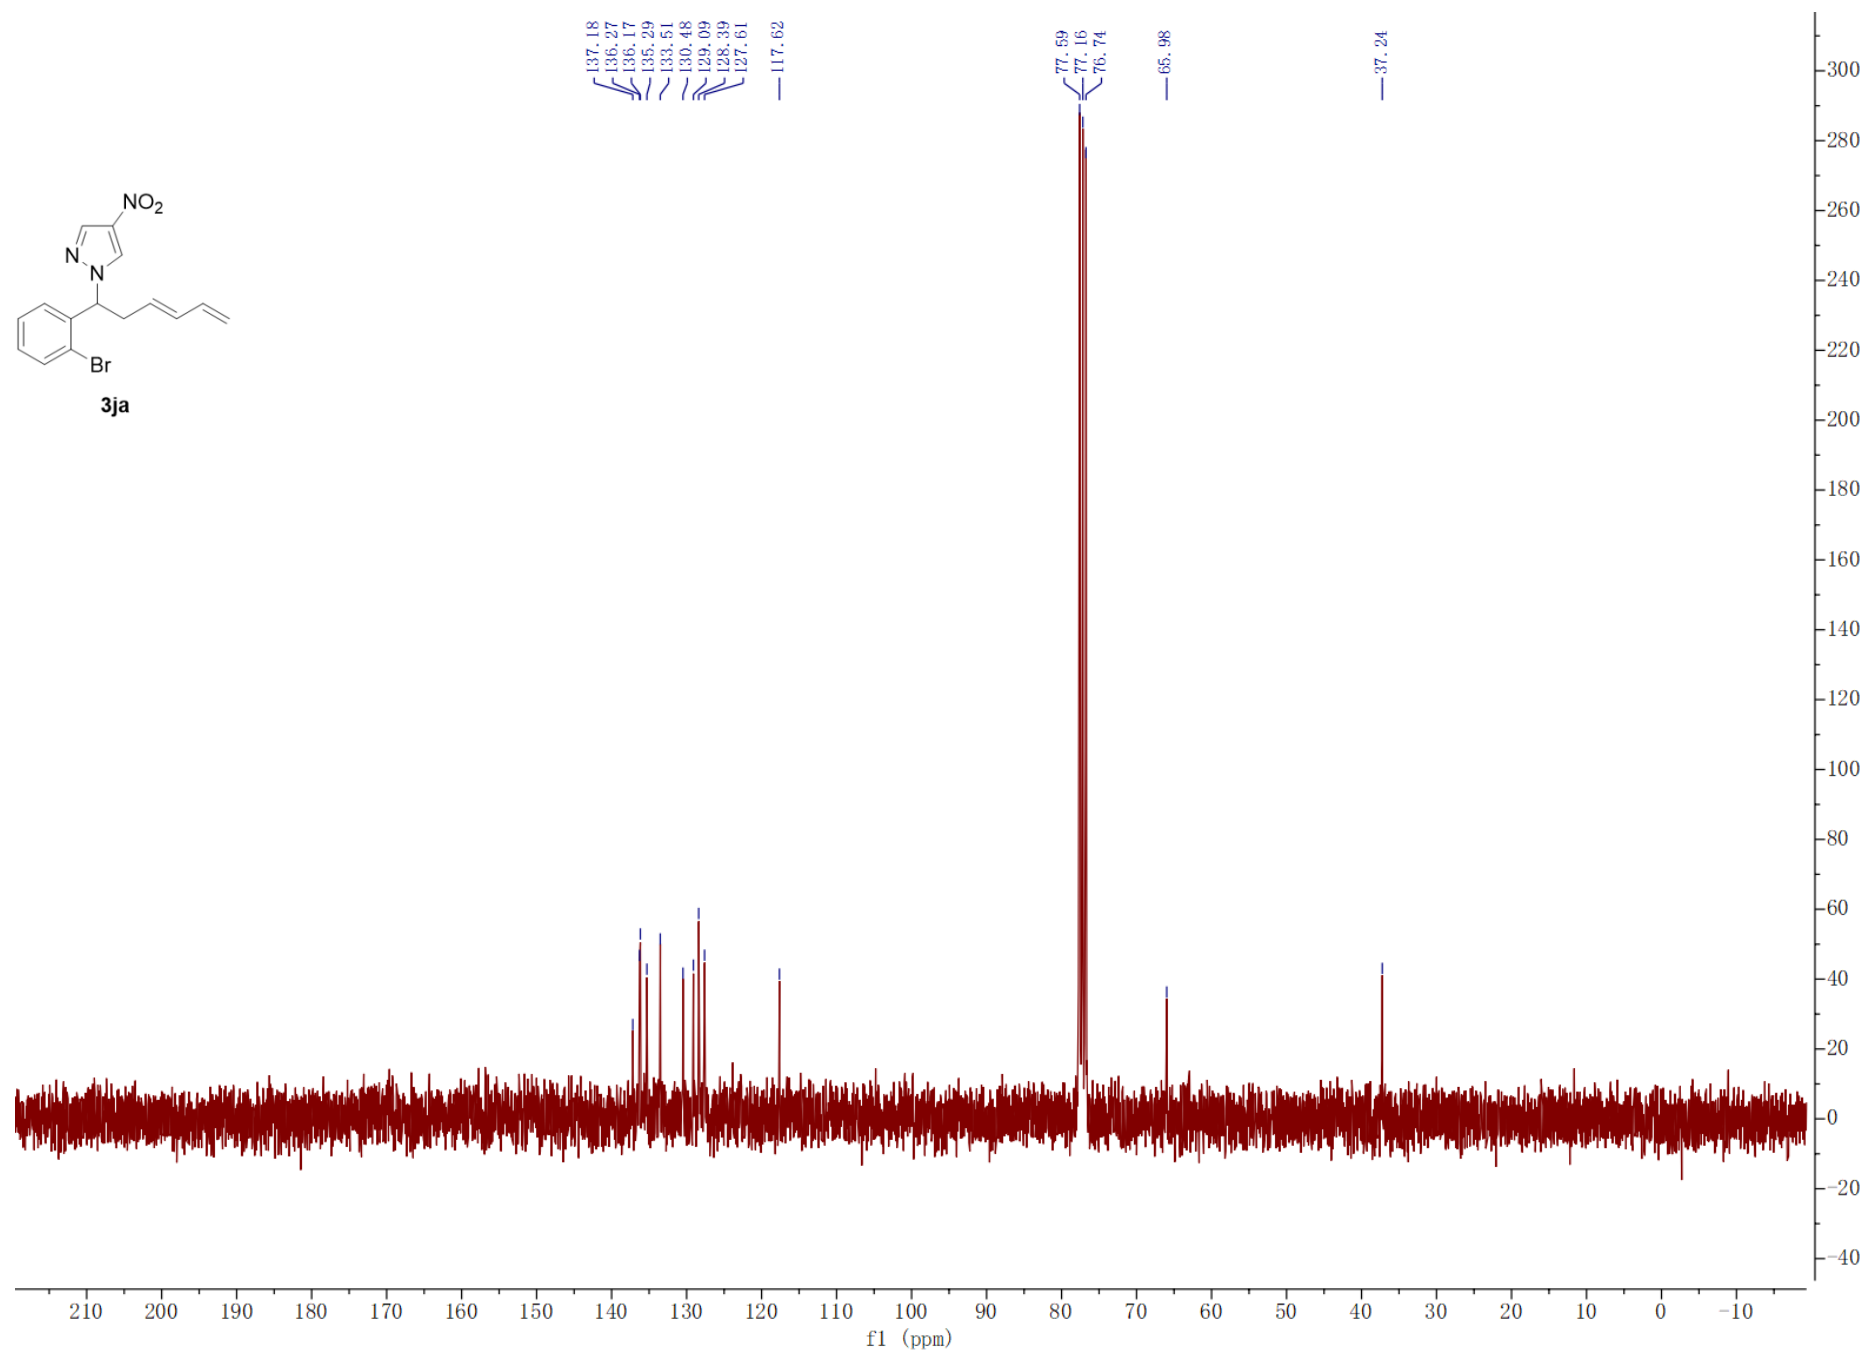

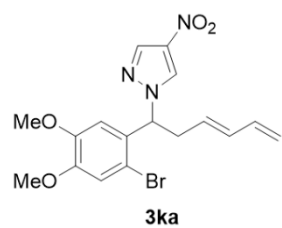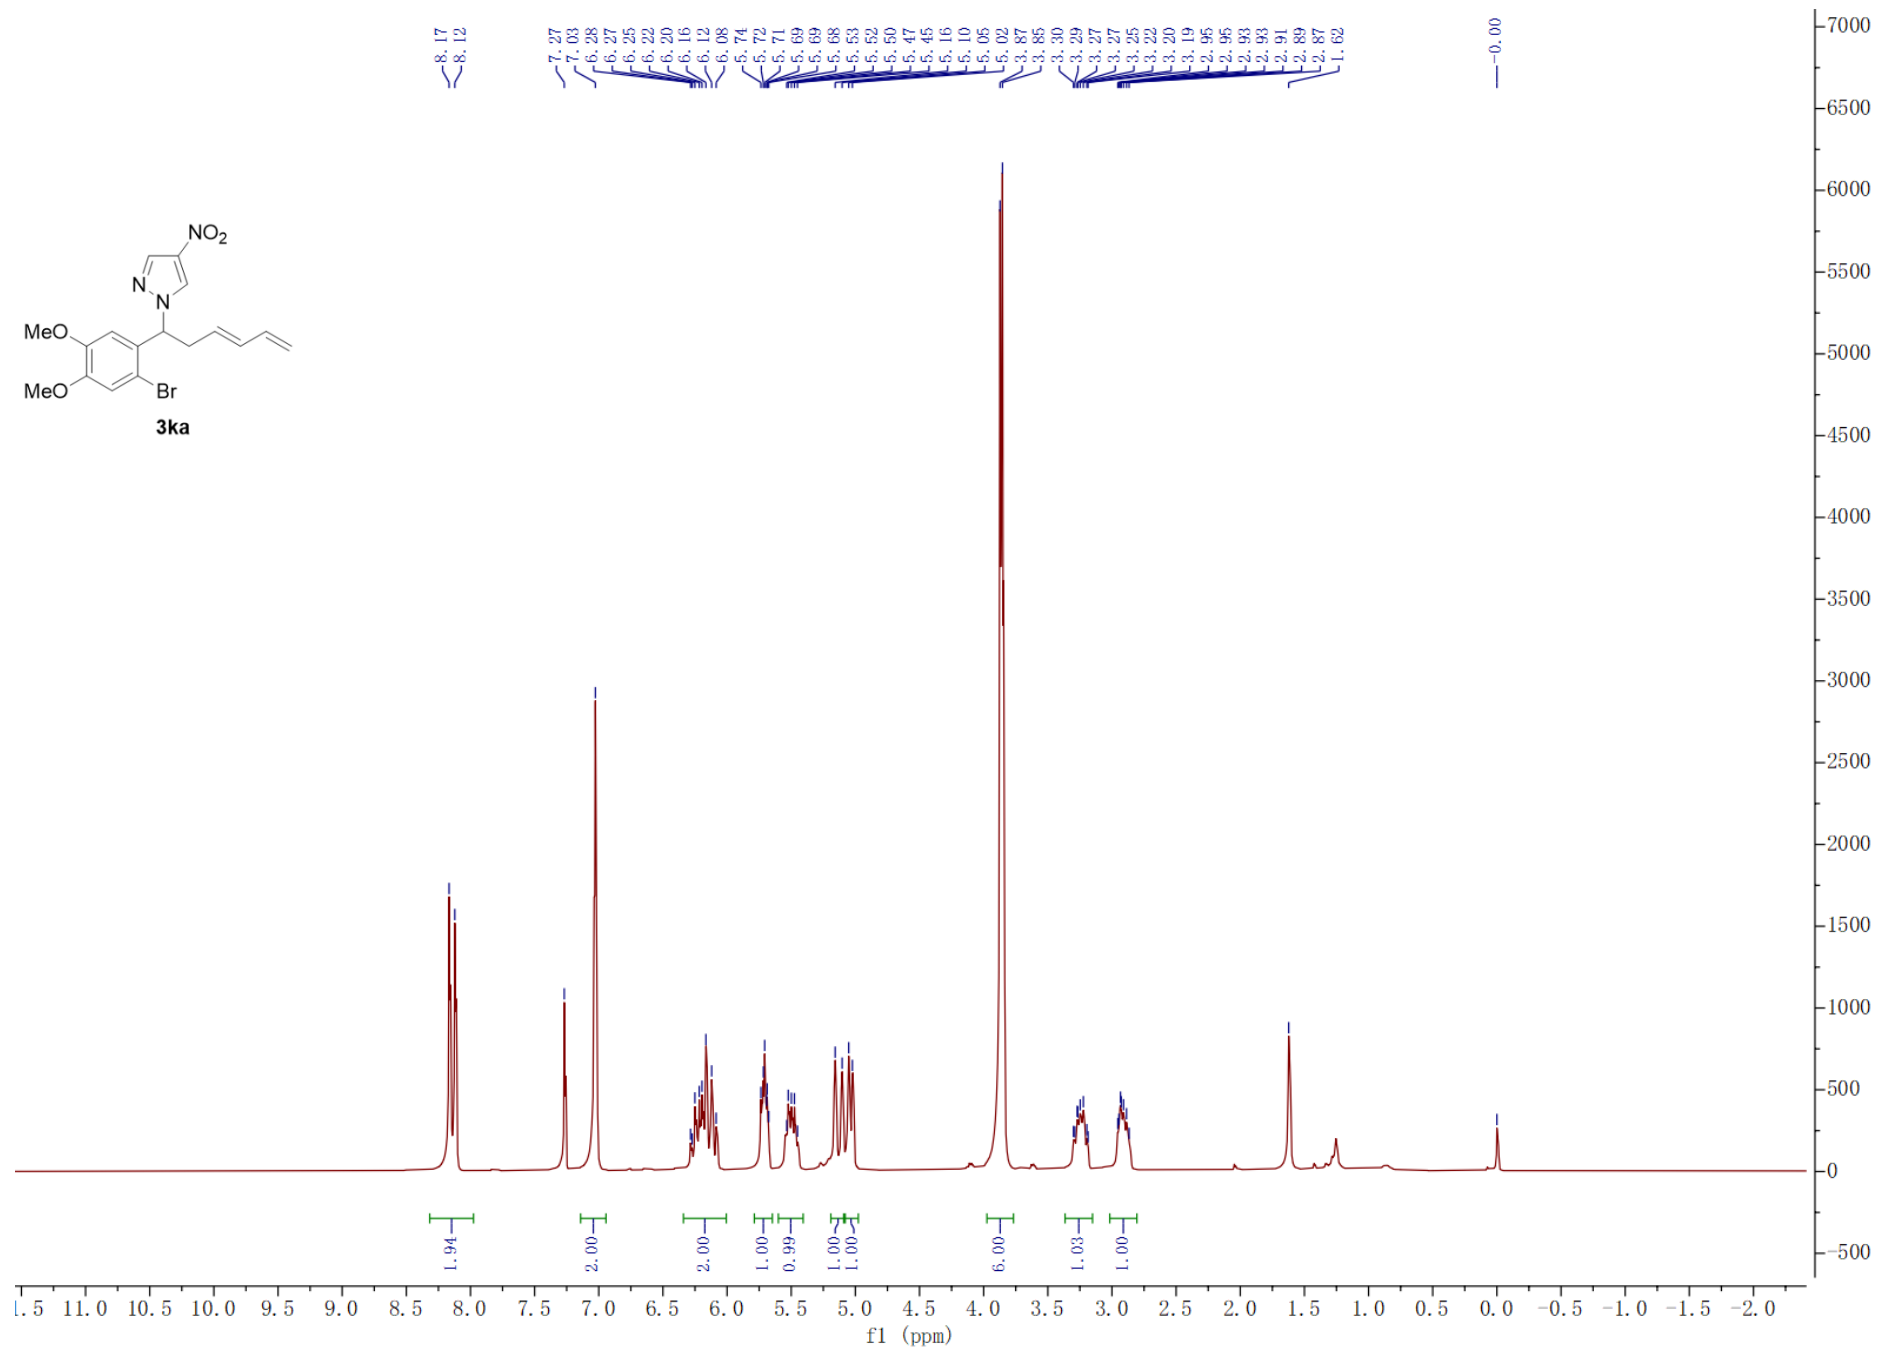

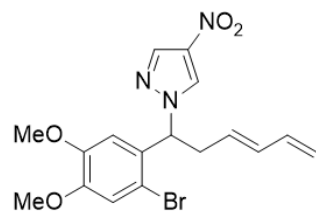

**3ka**

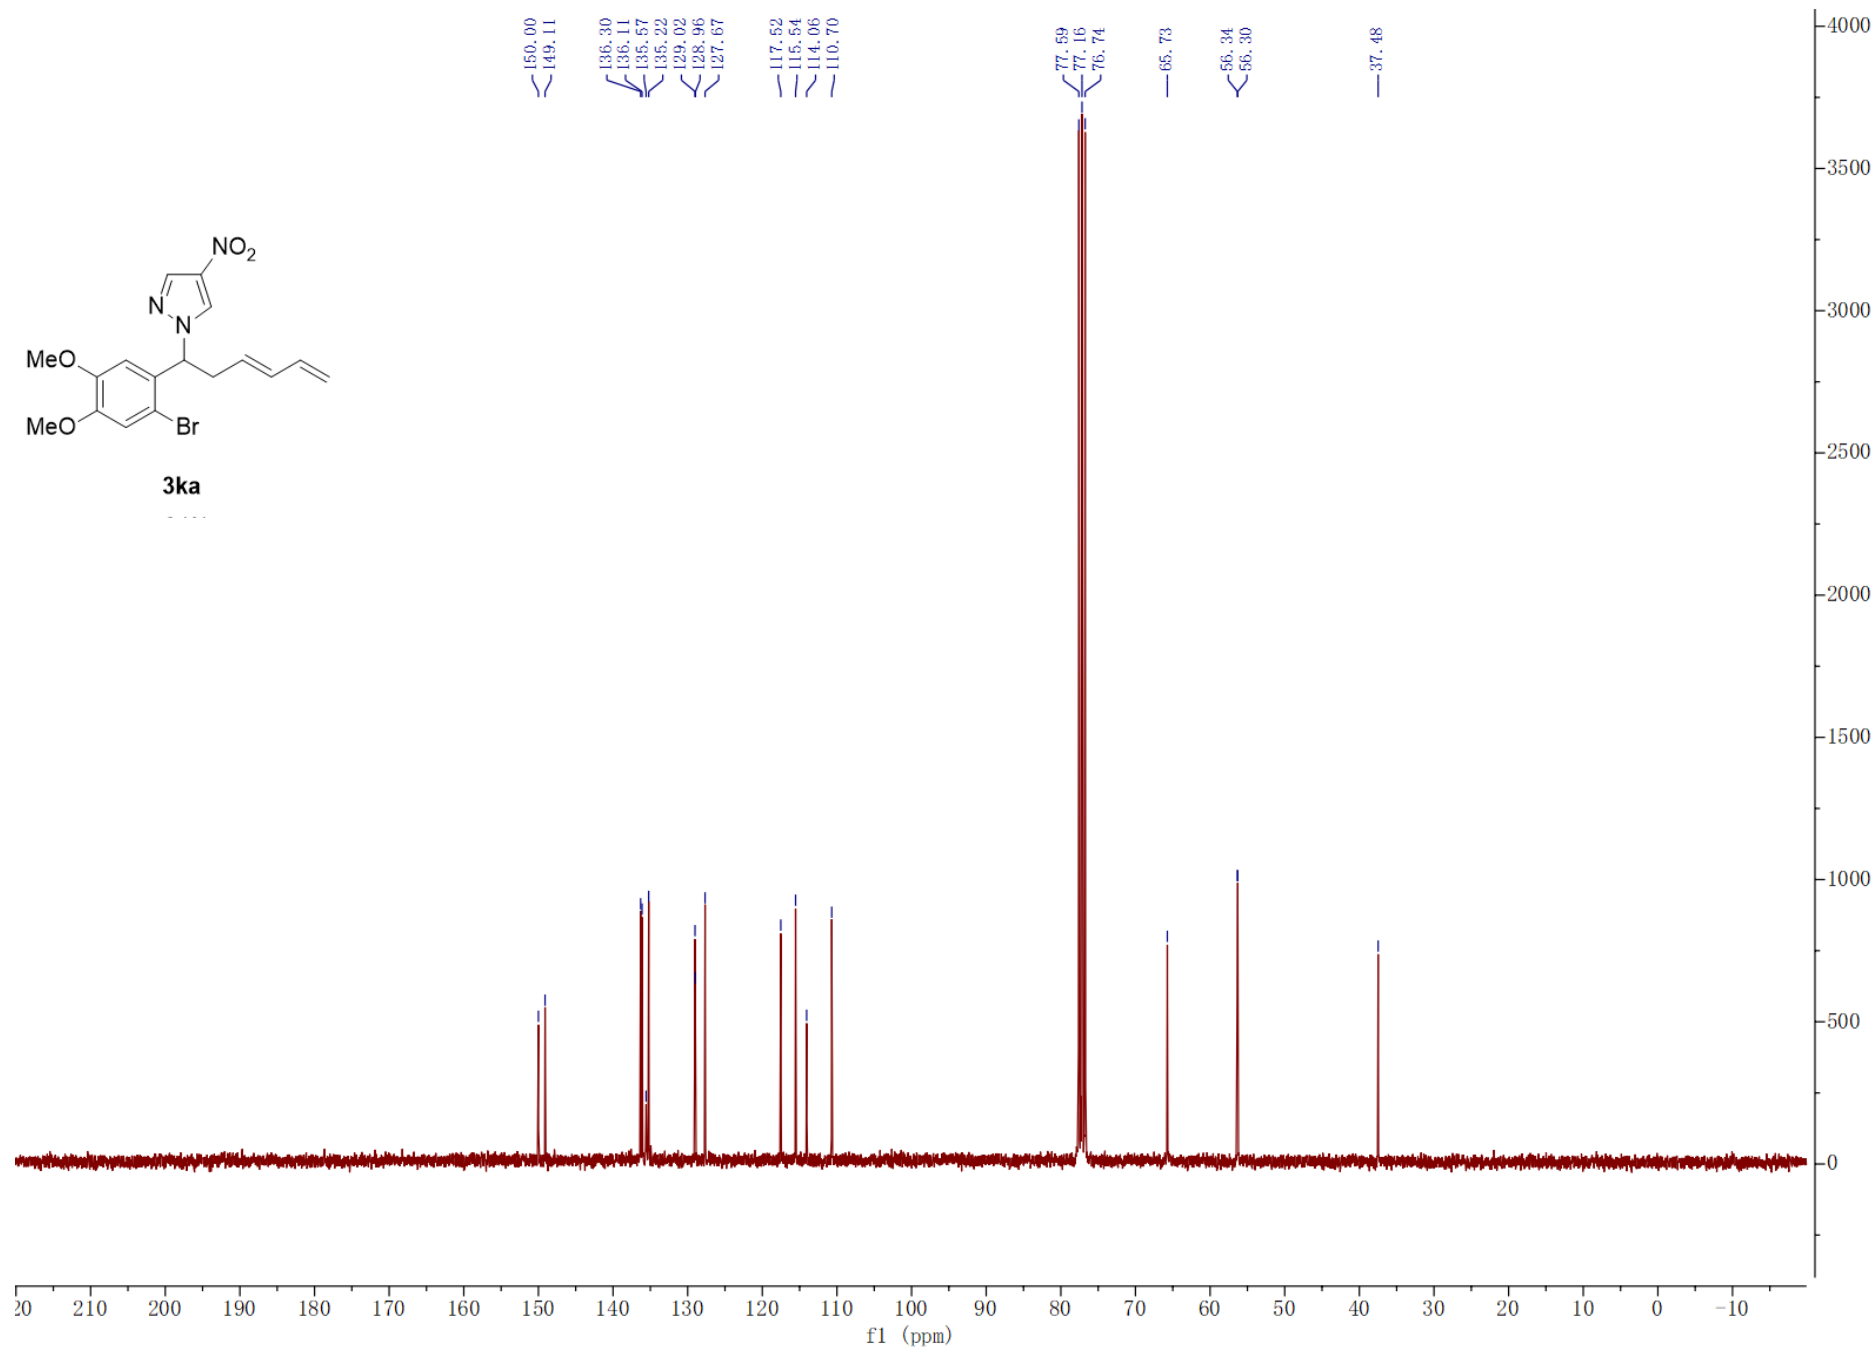

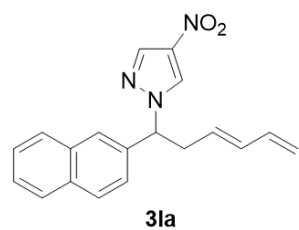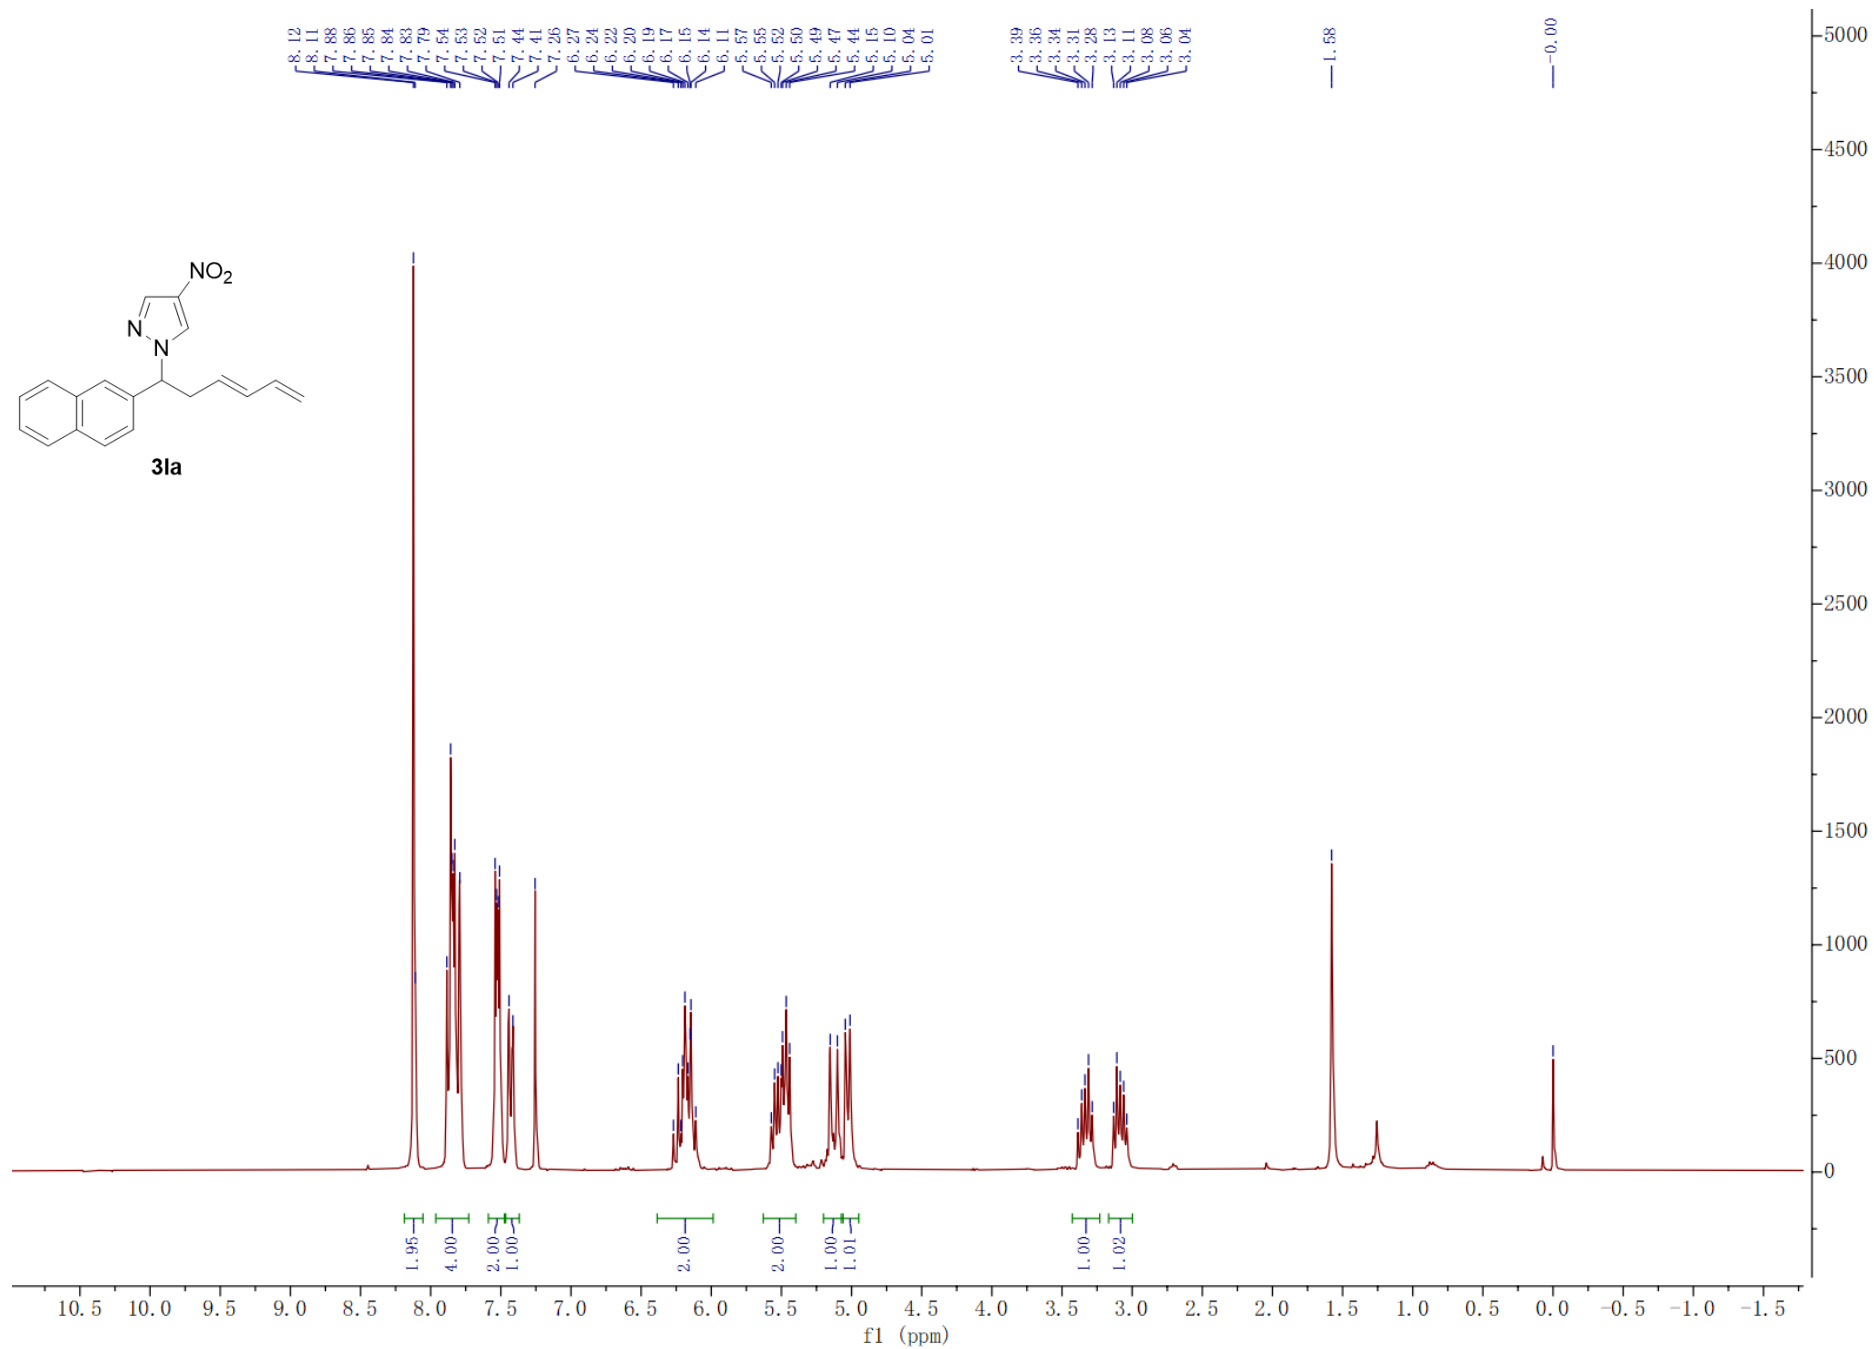

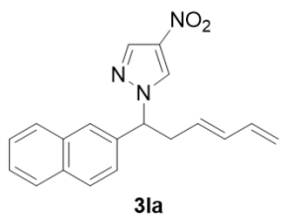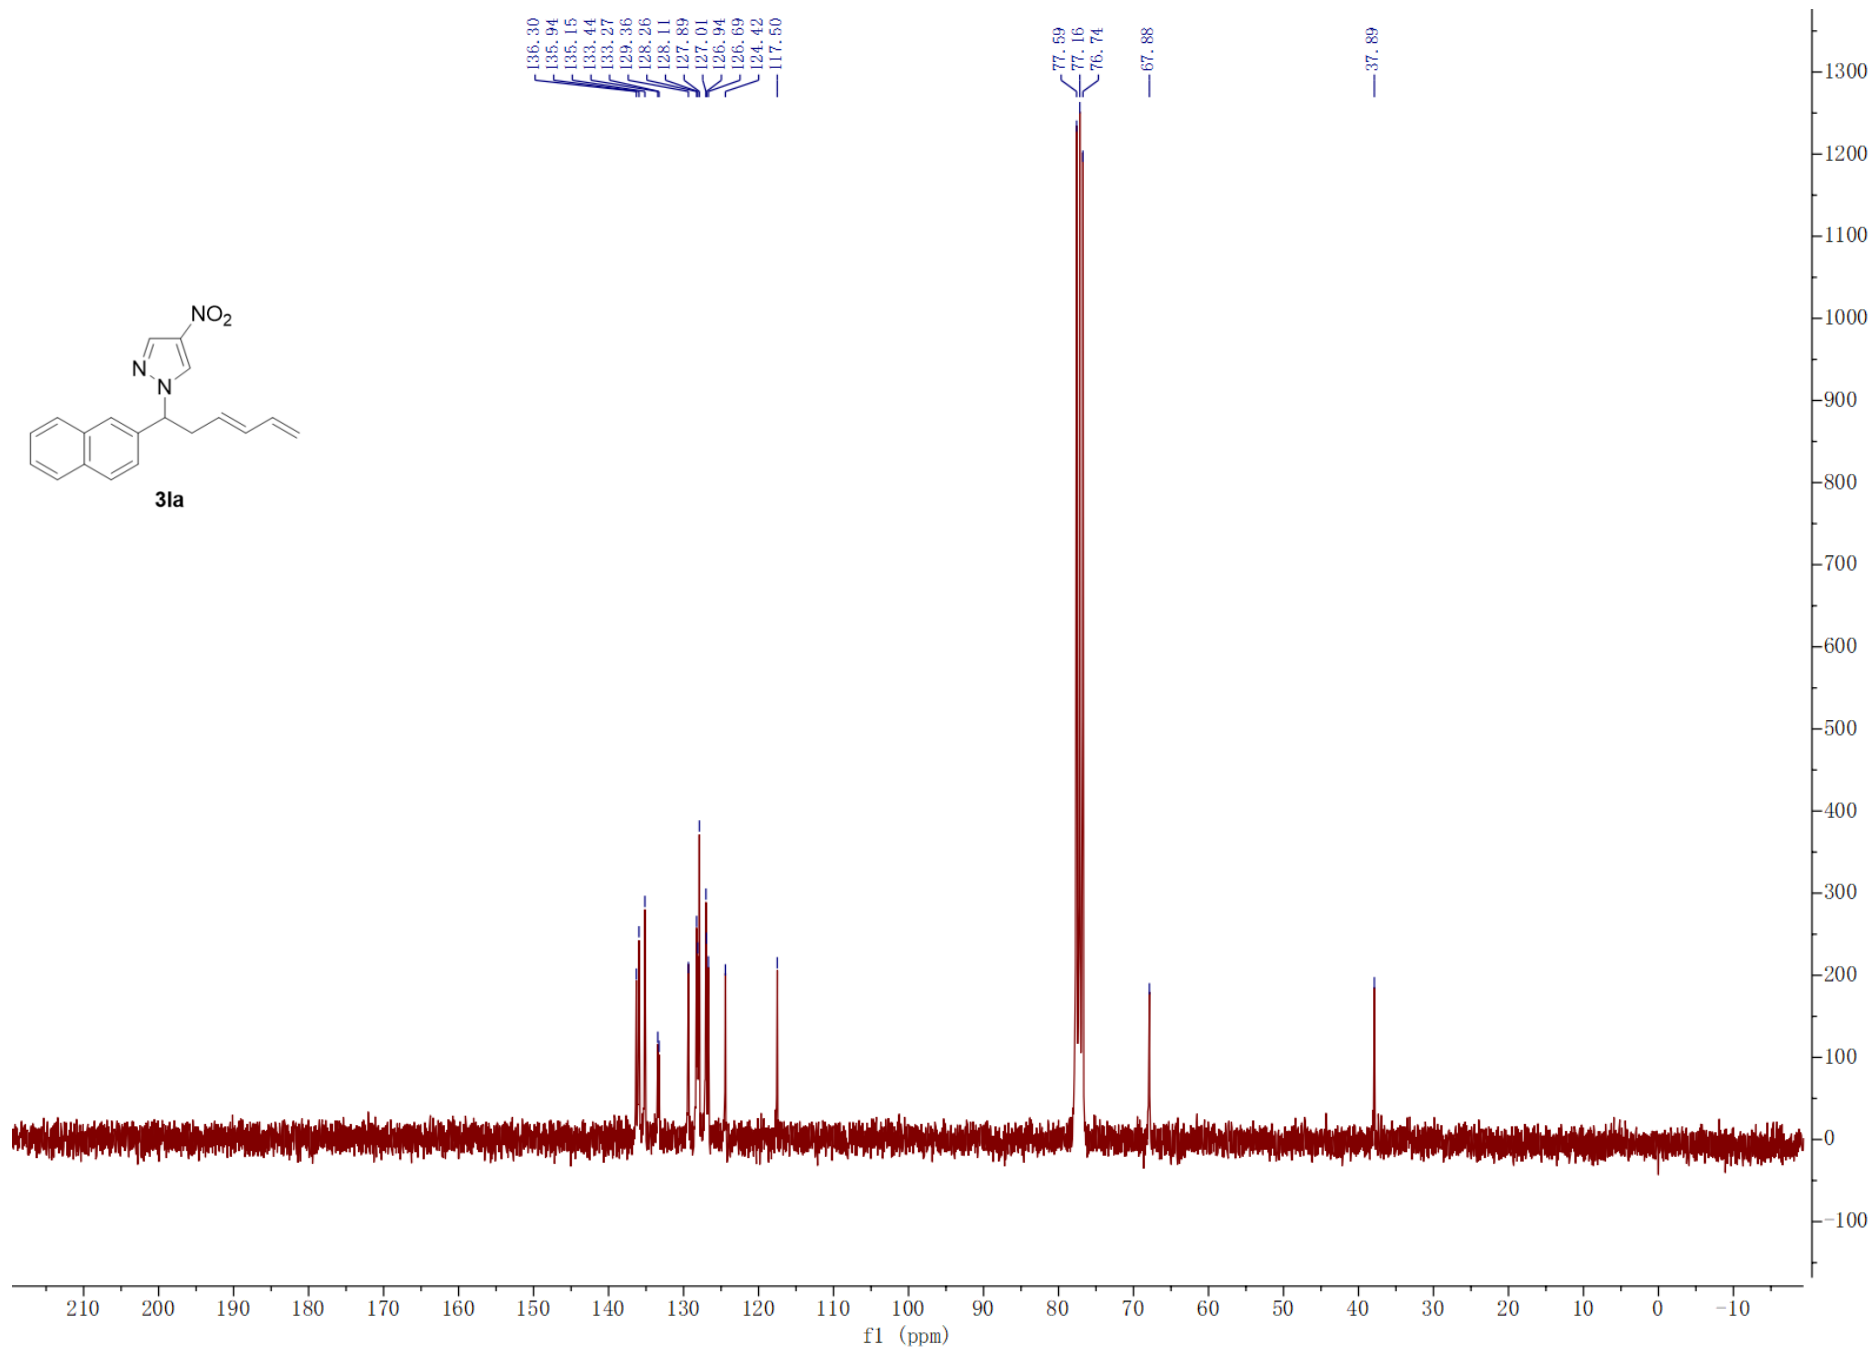

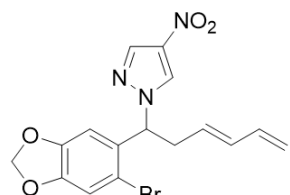

**3ma**

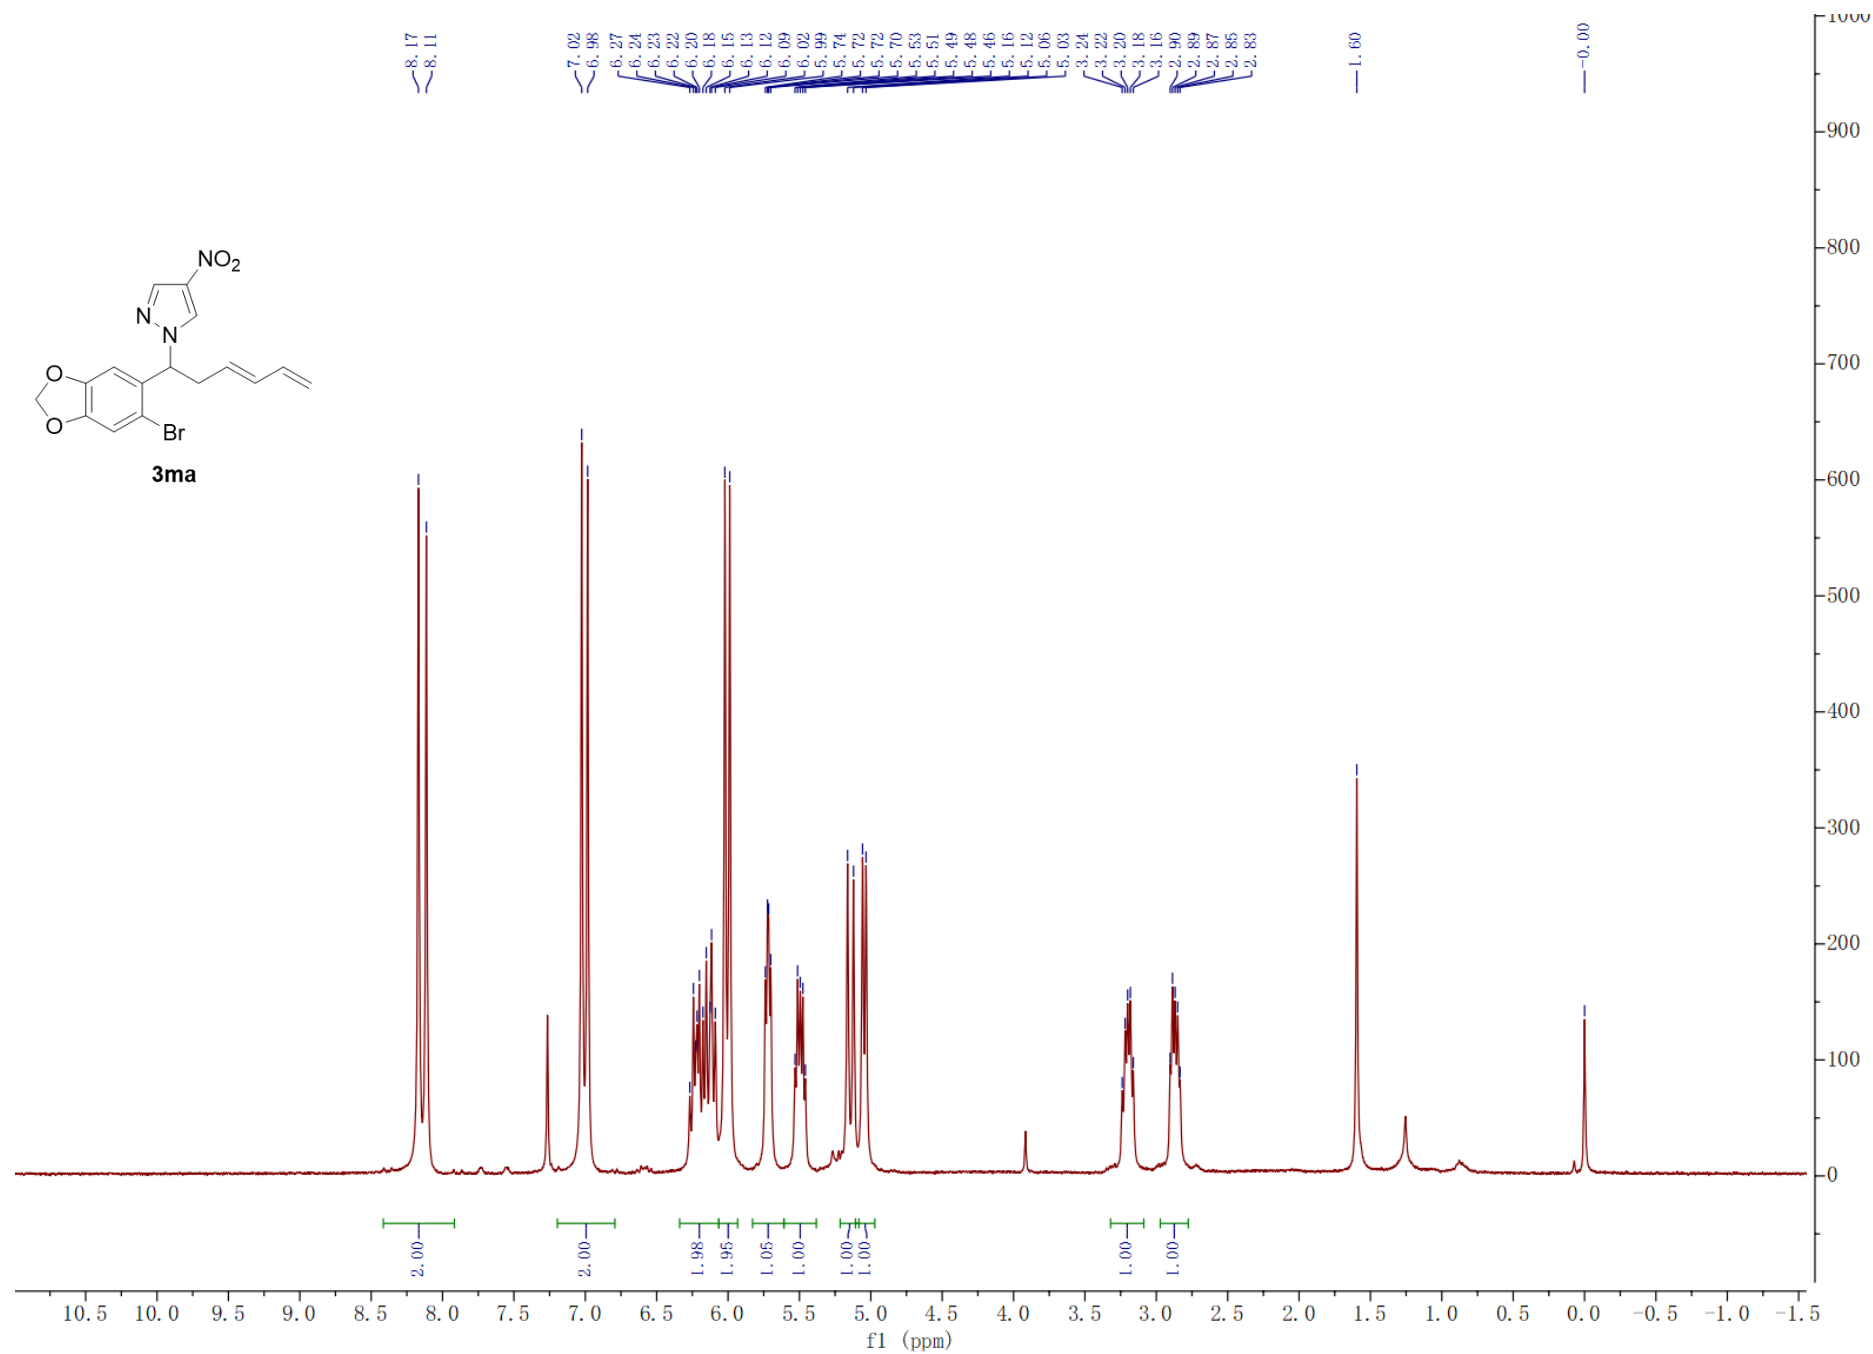



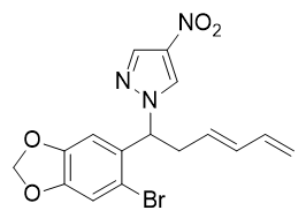

**3ma**

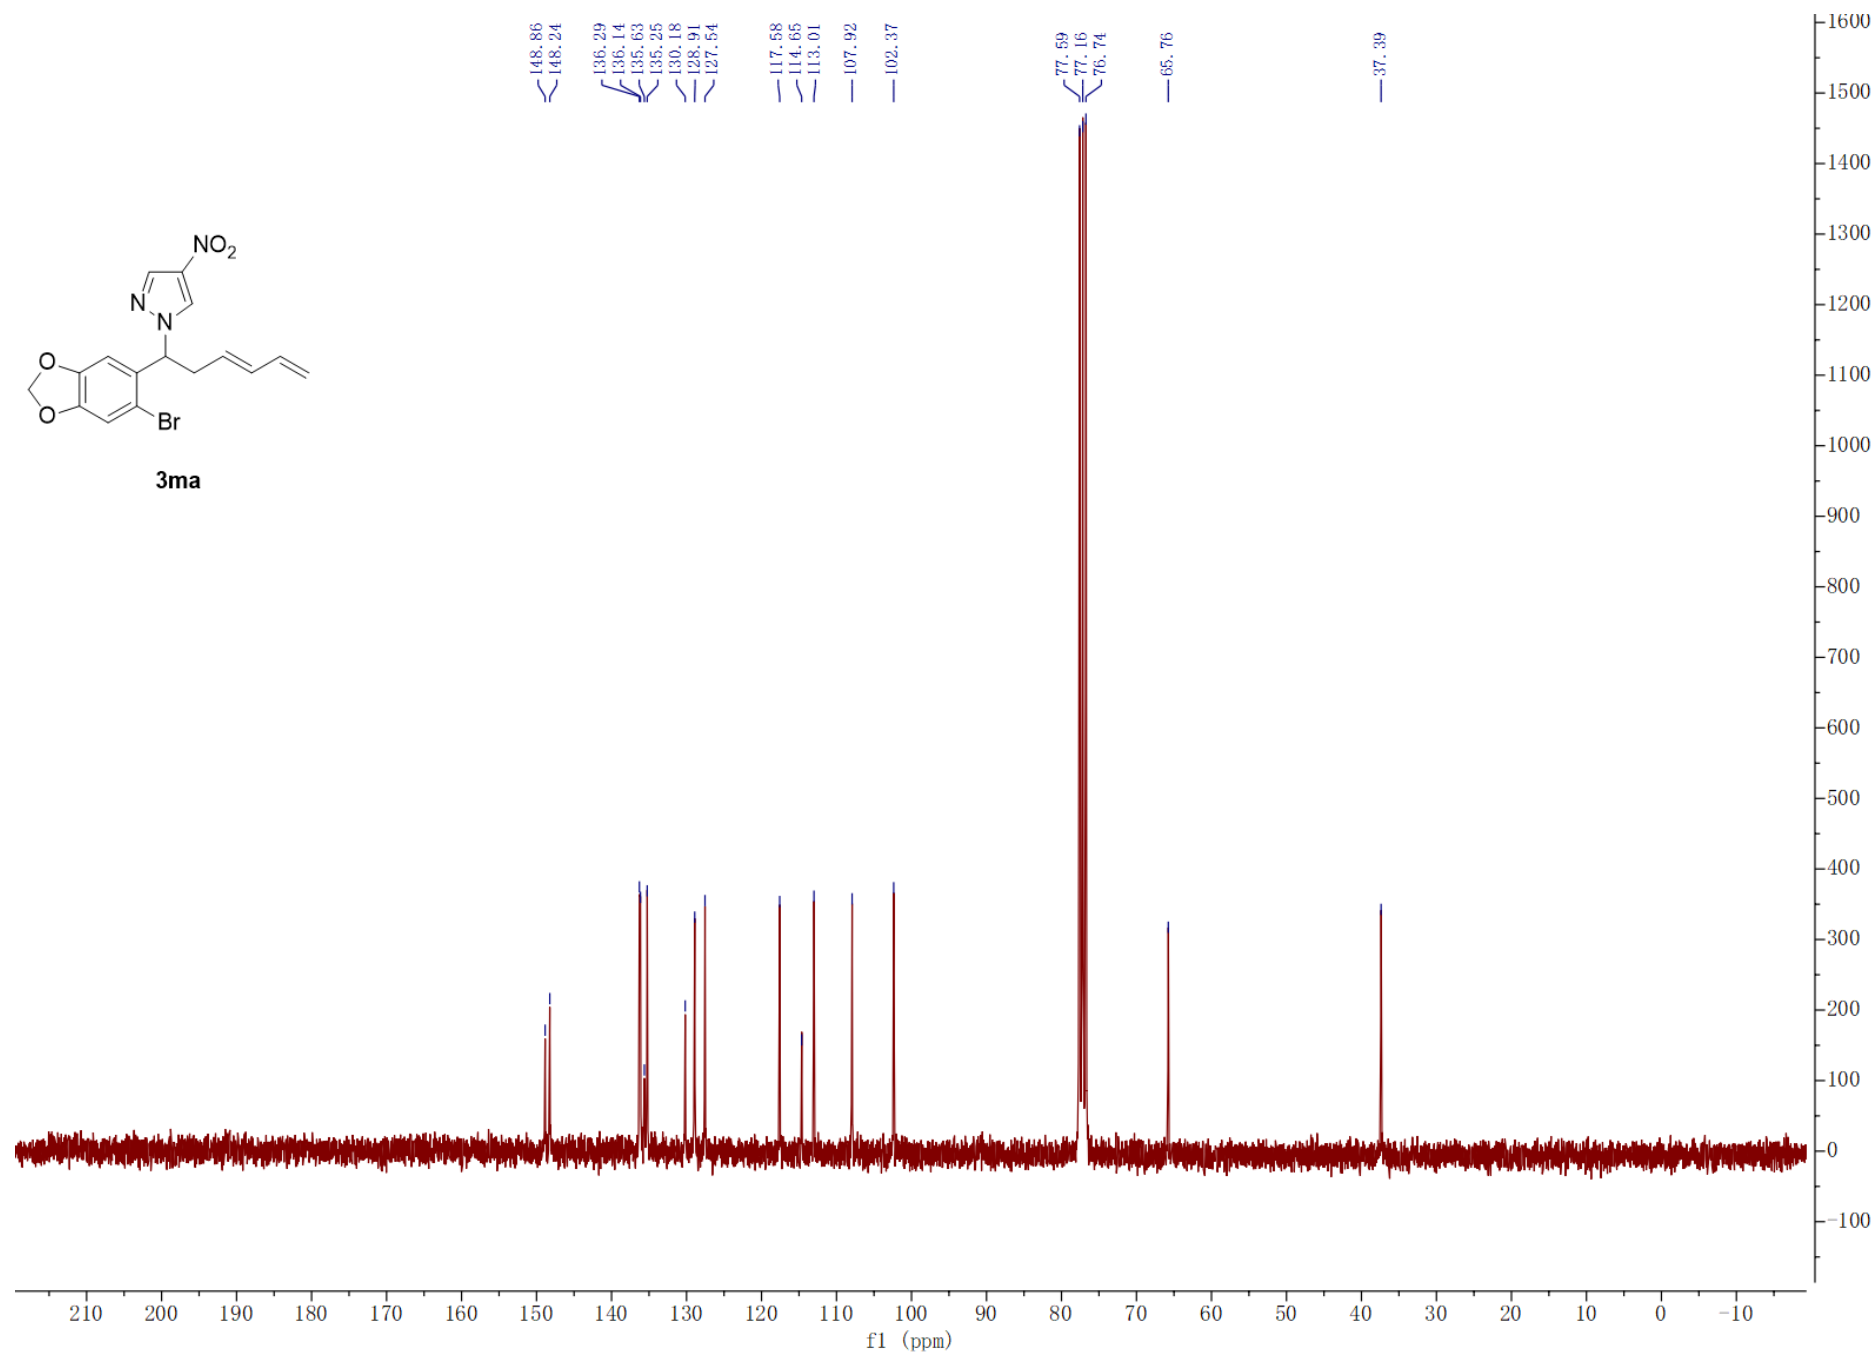

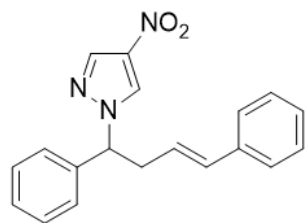

**3na**

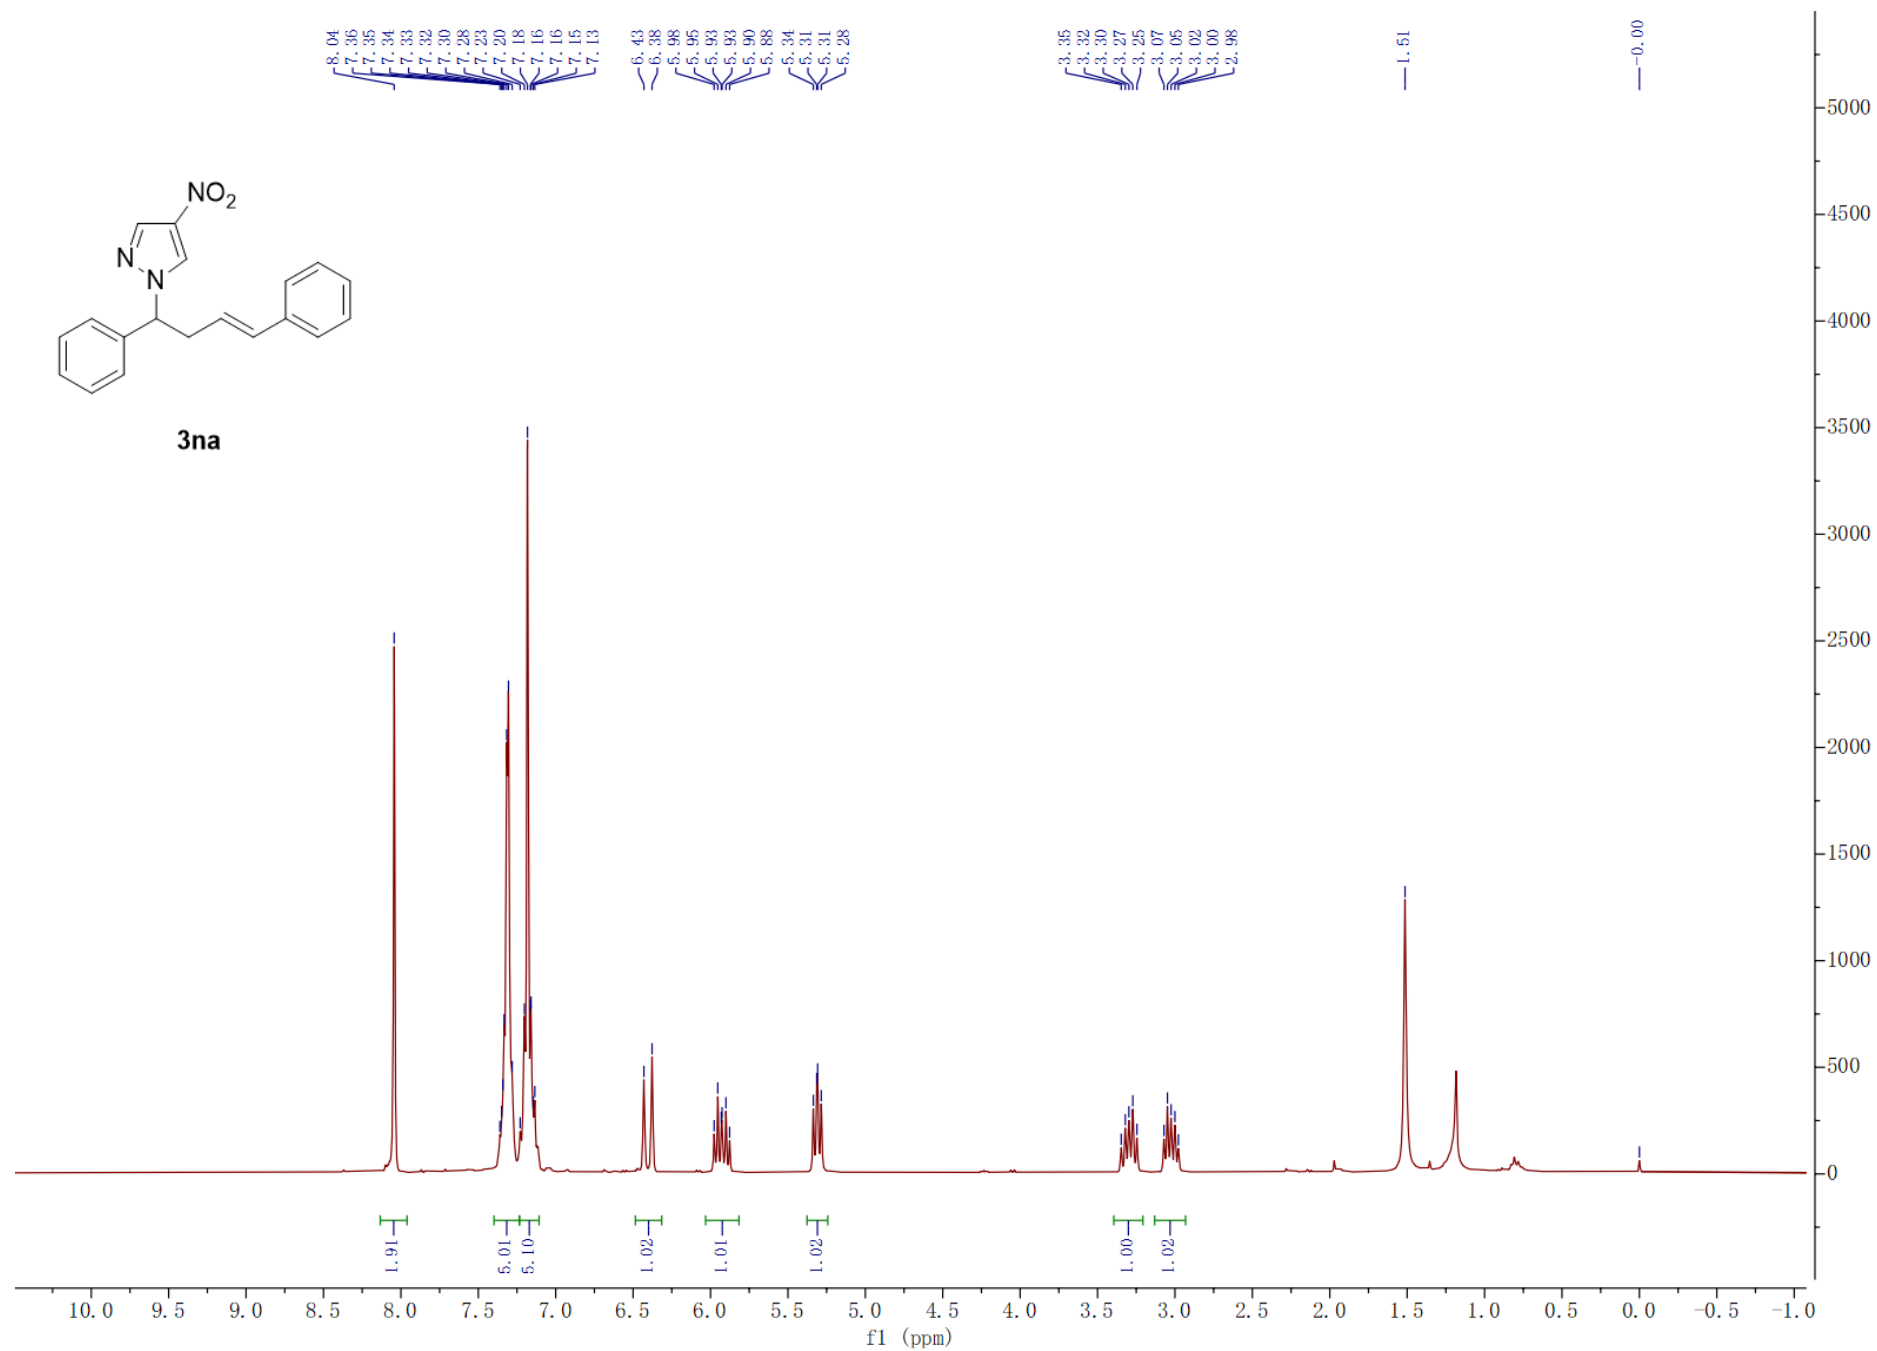

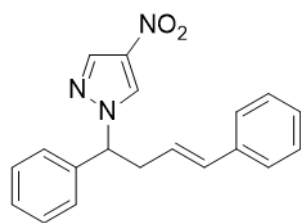

**3na**

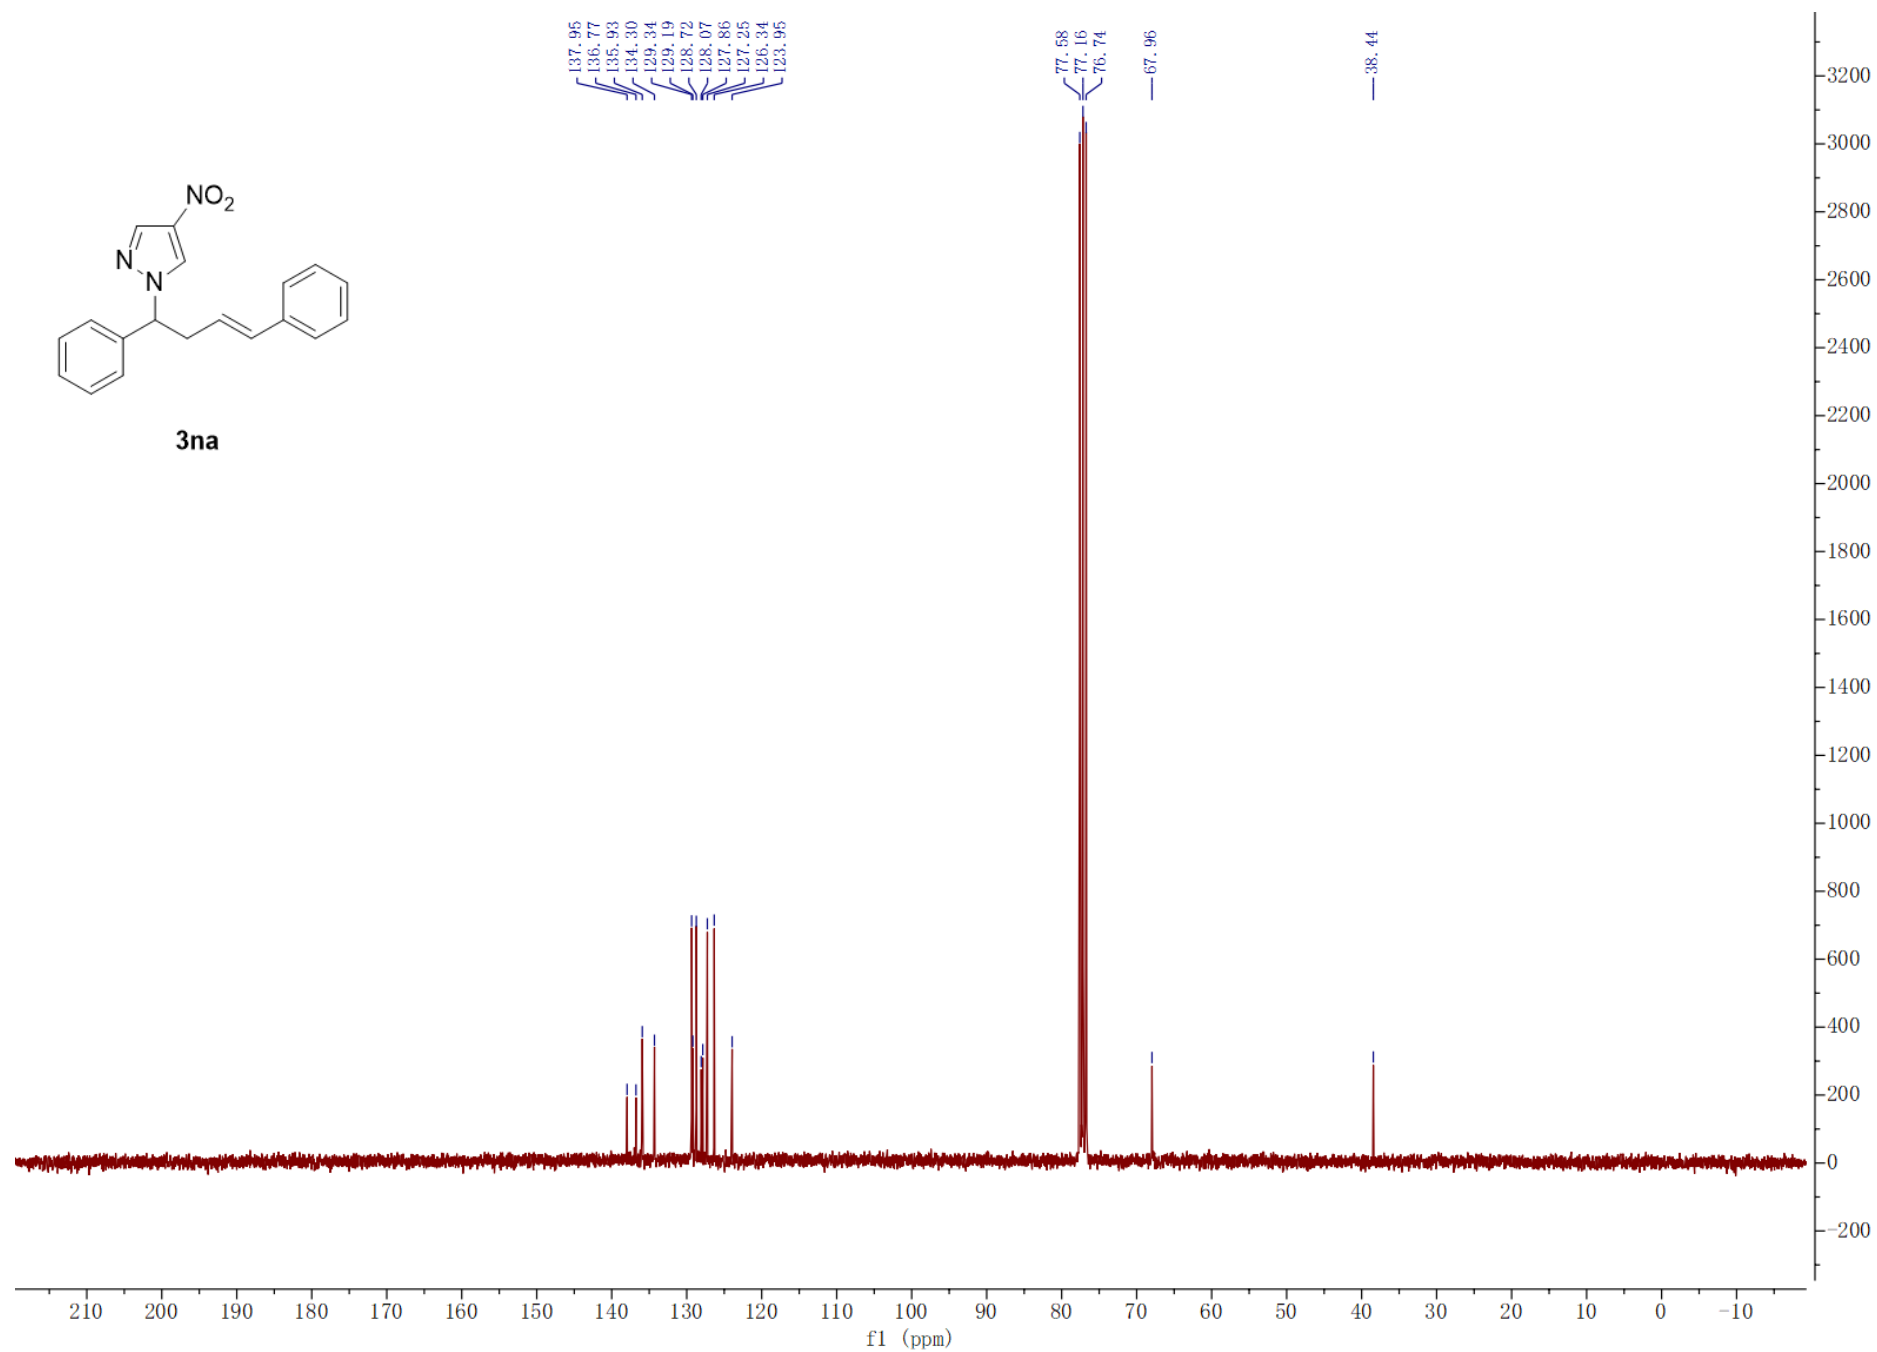

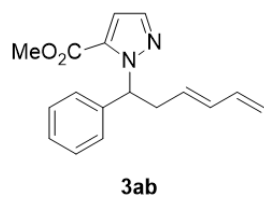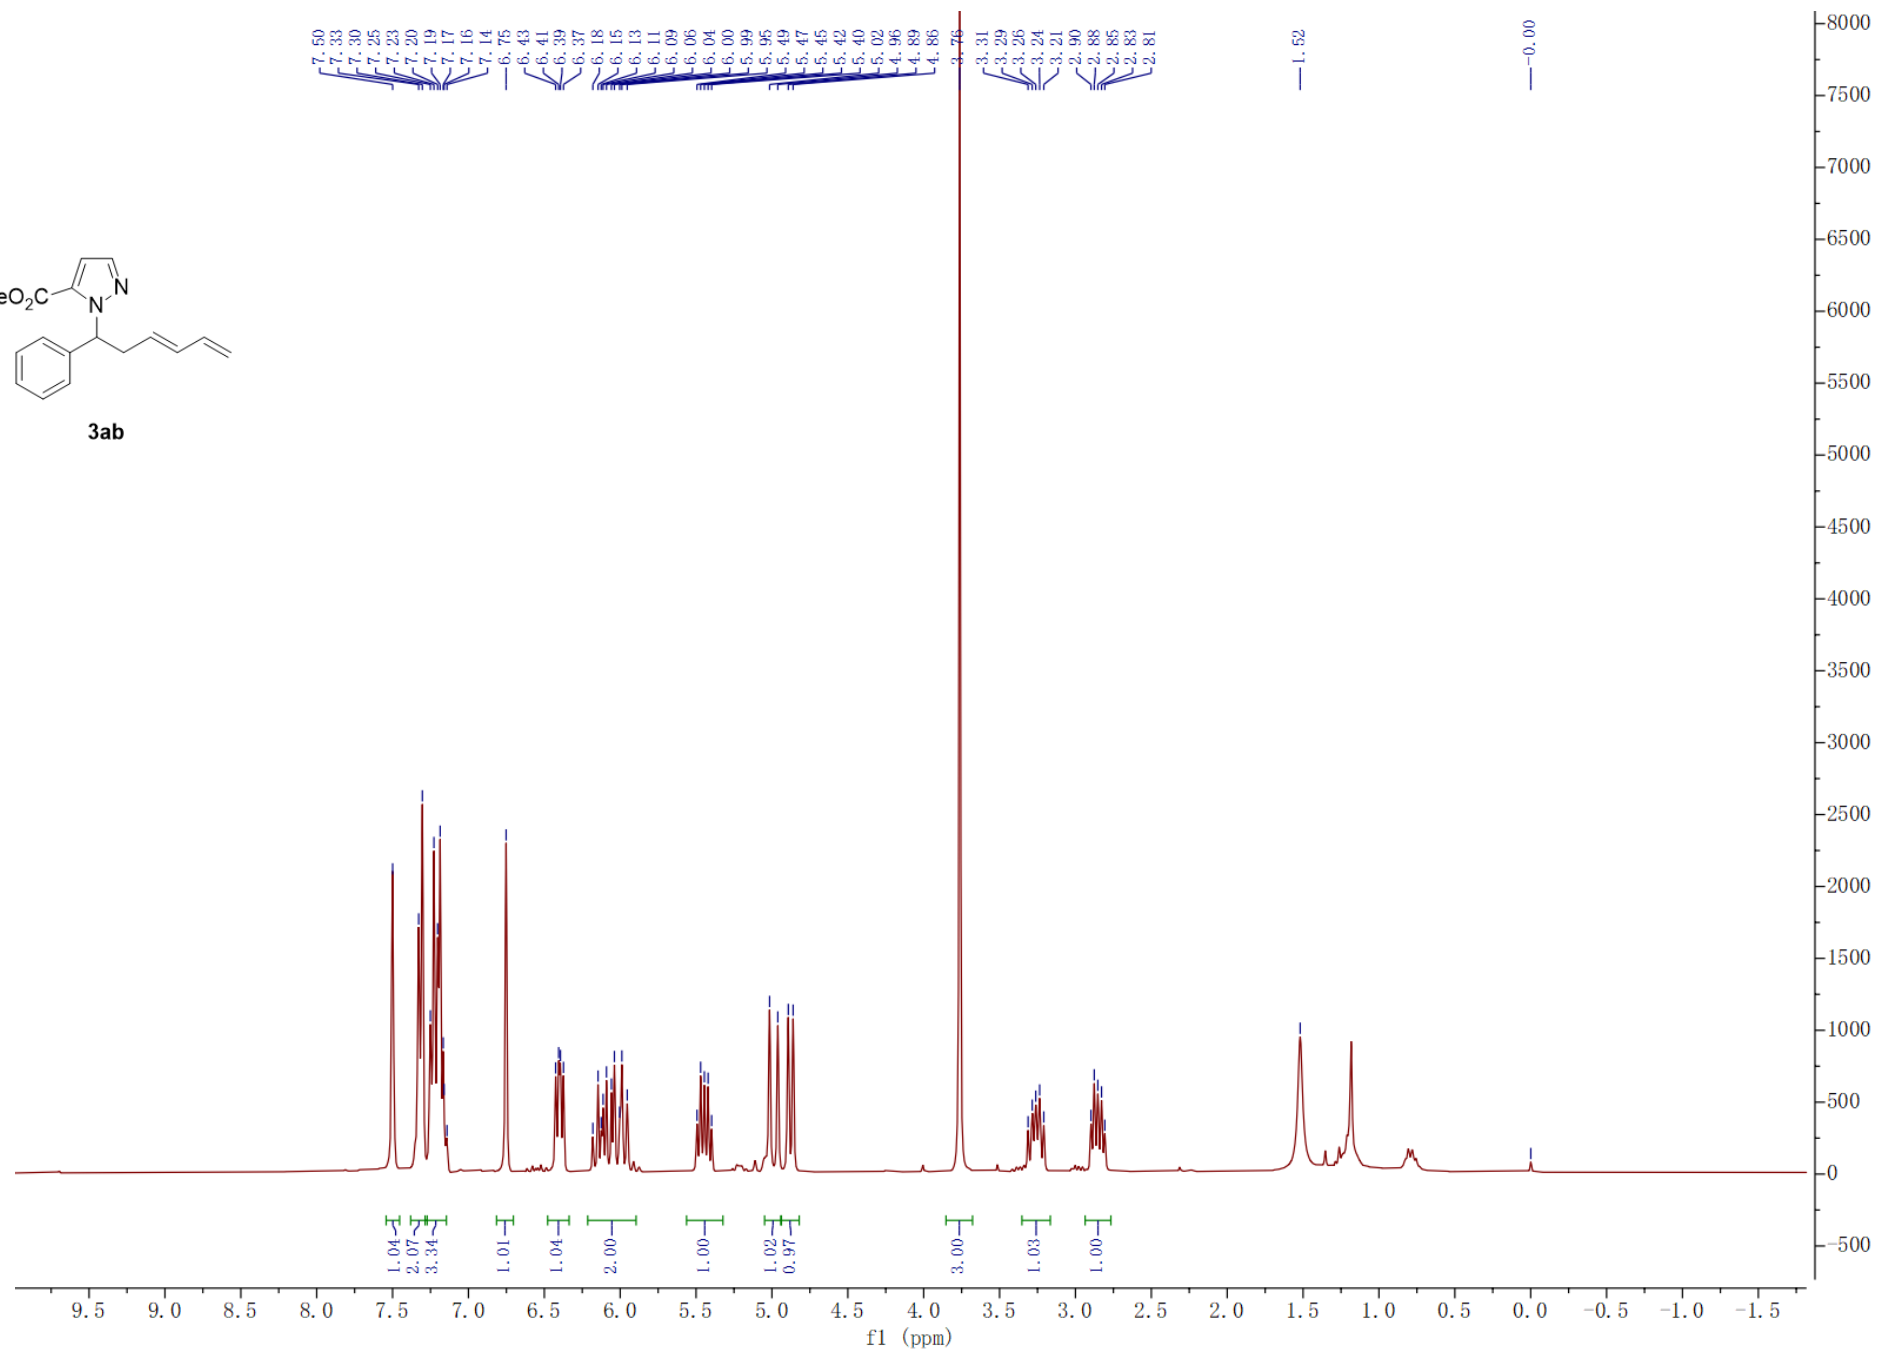

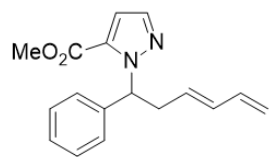

**3ab**

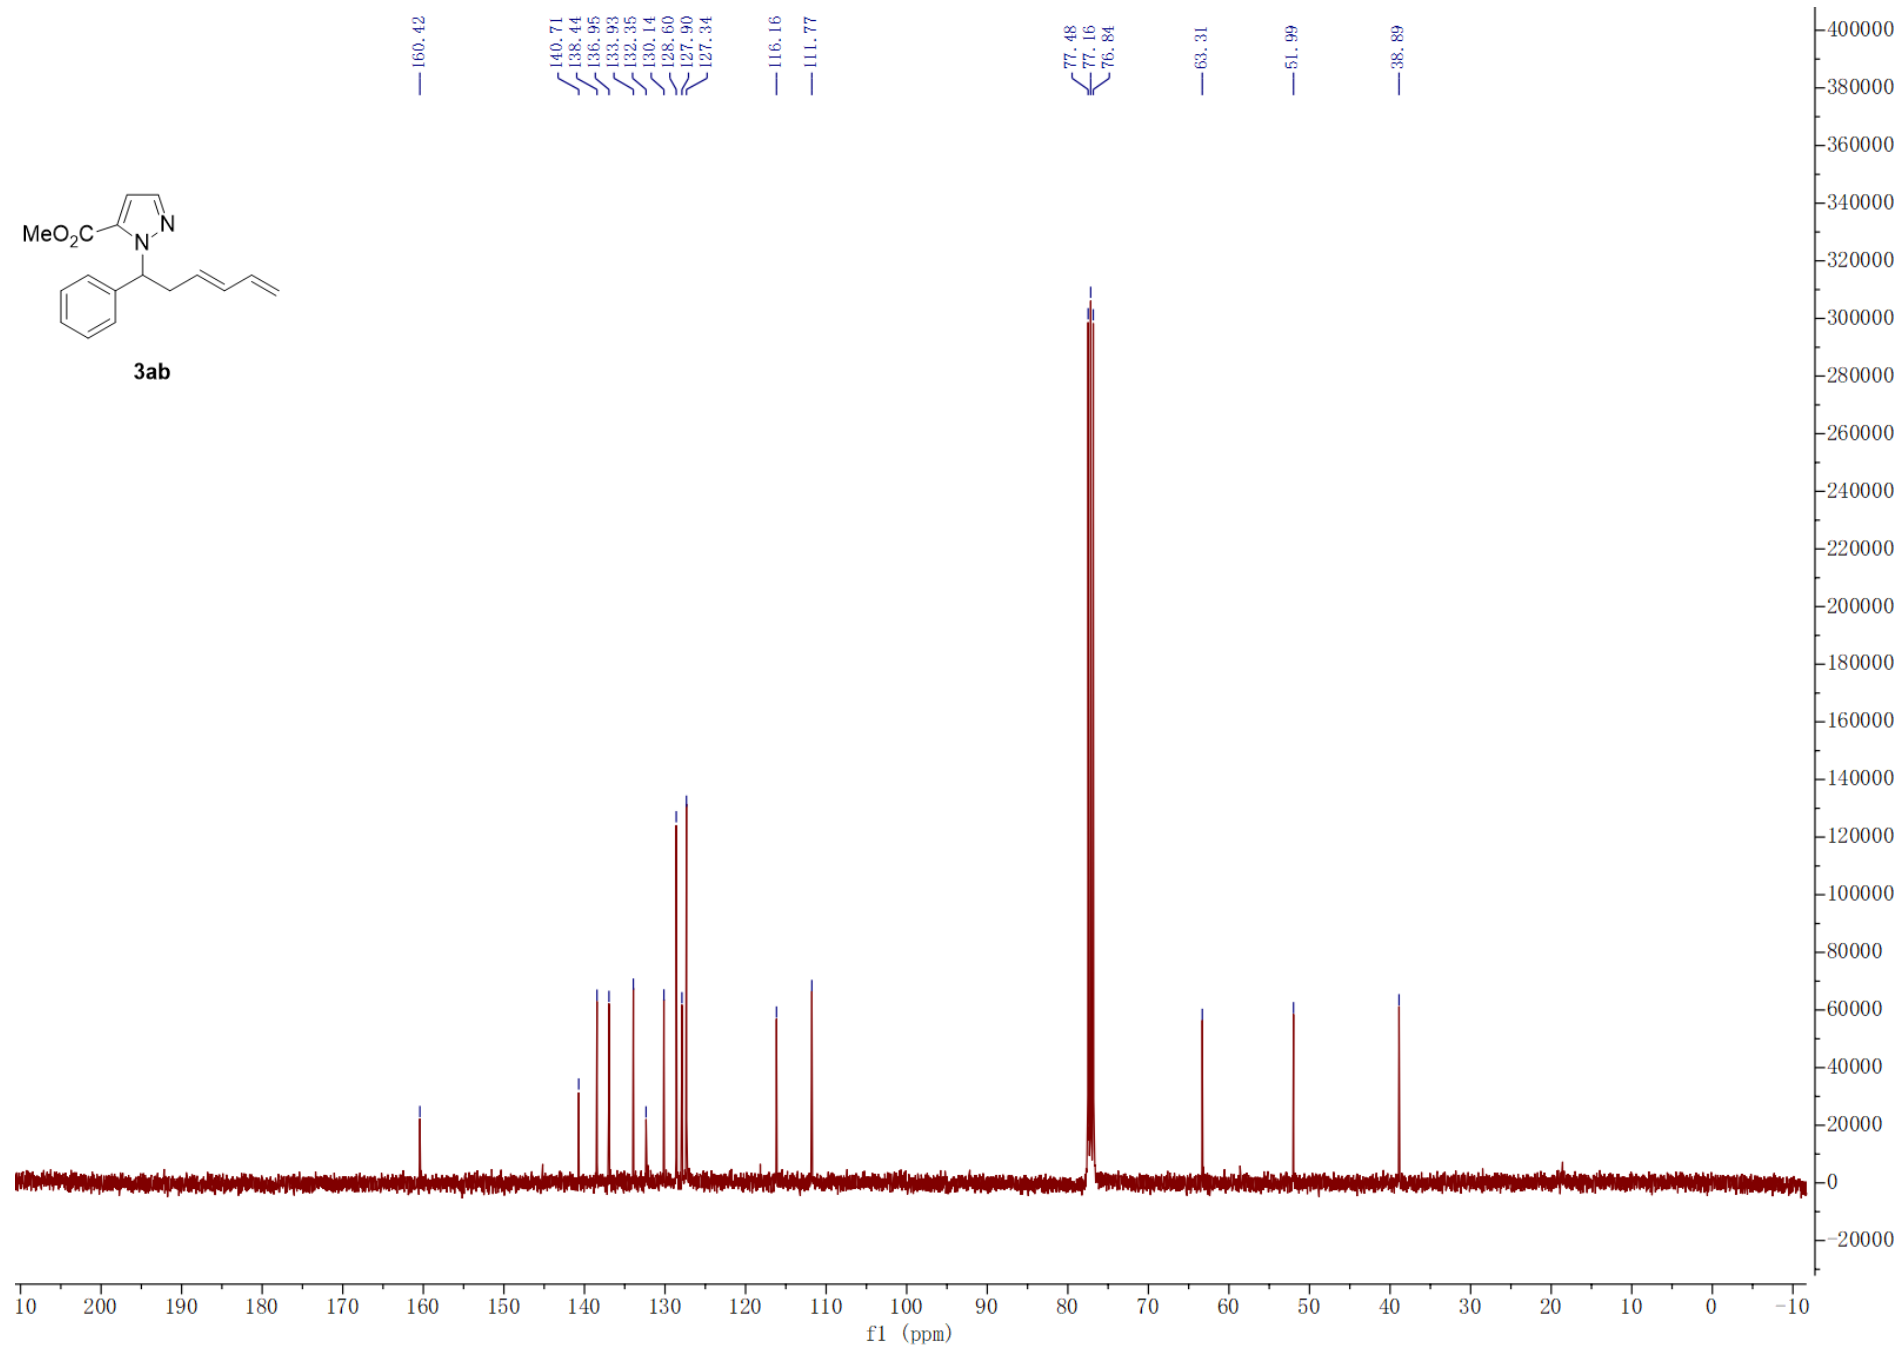

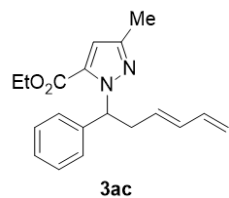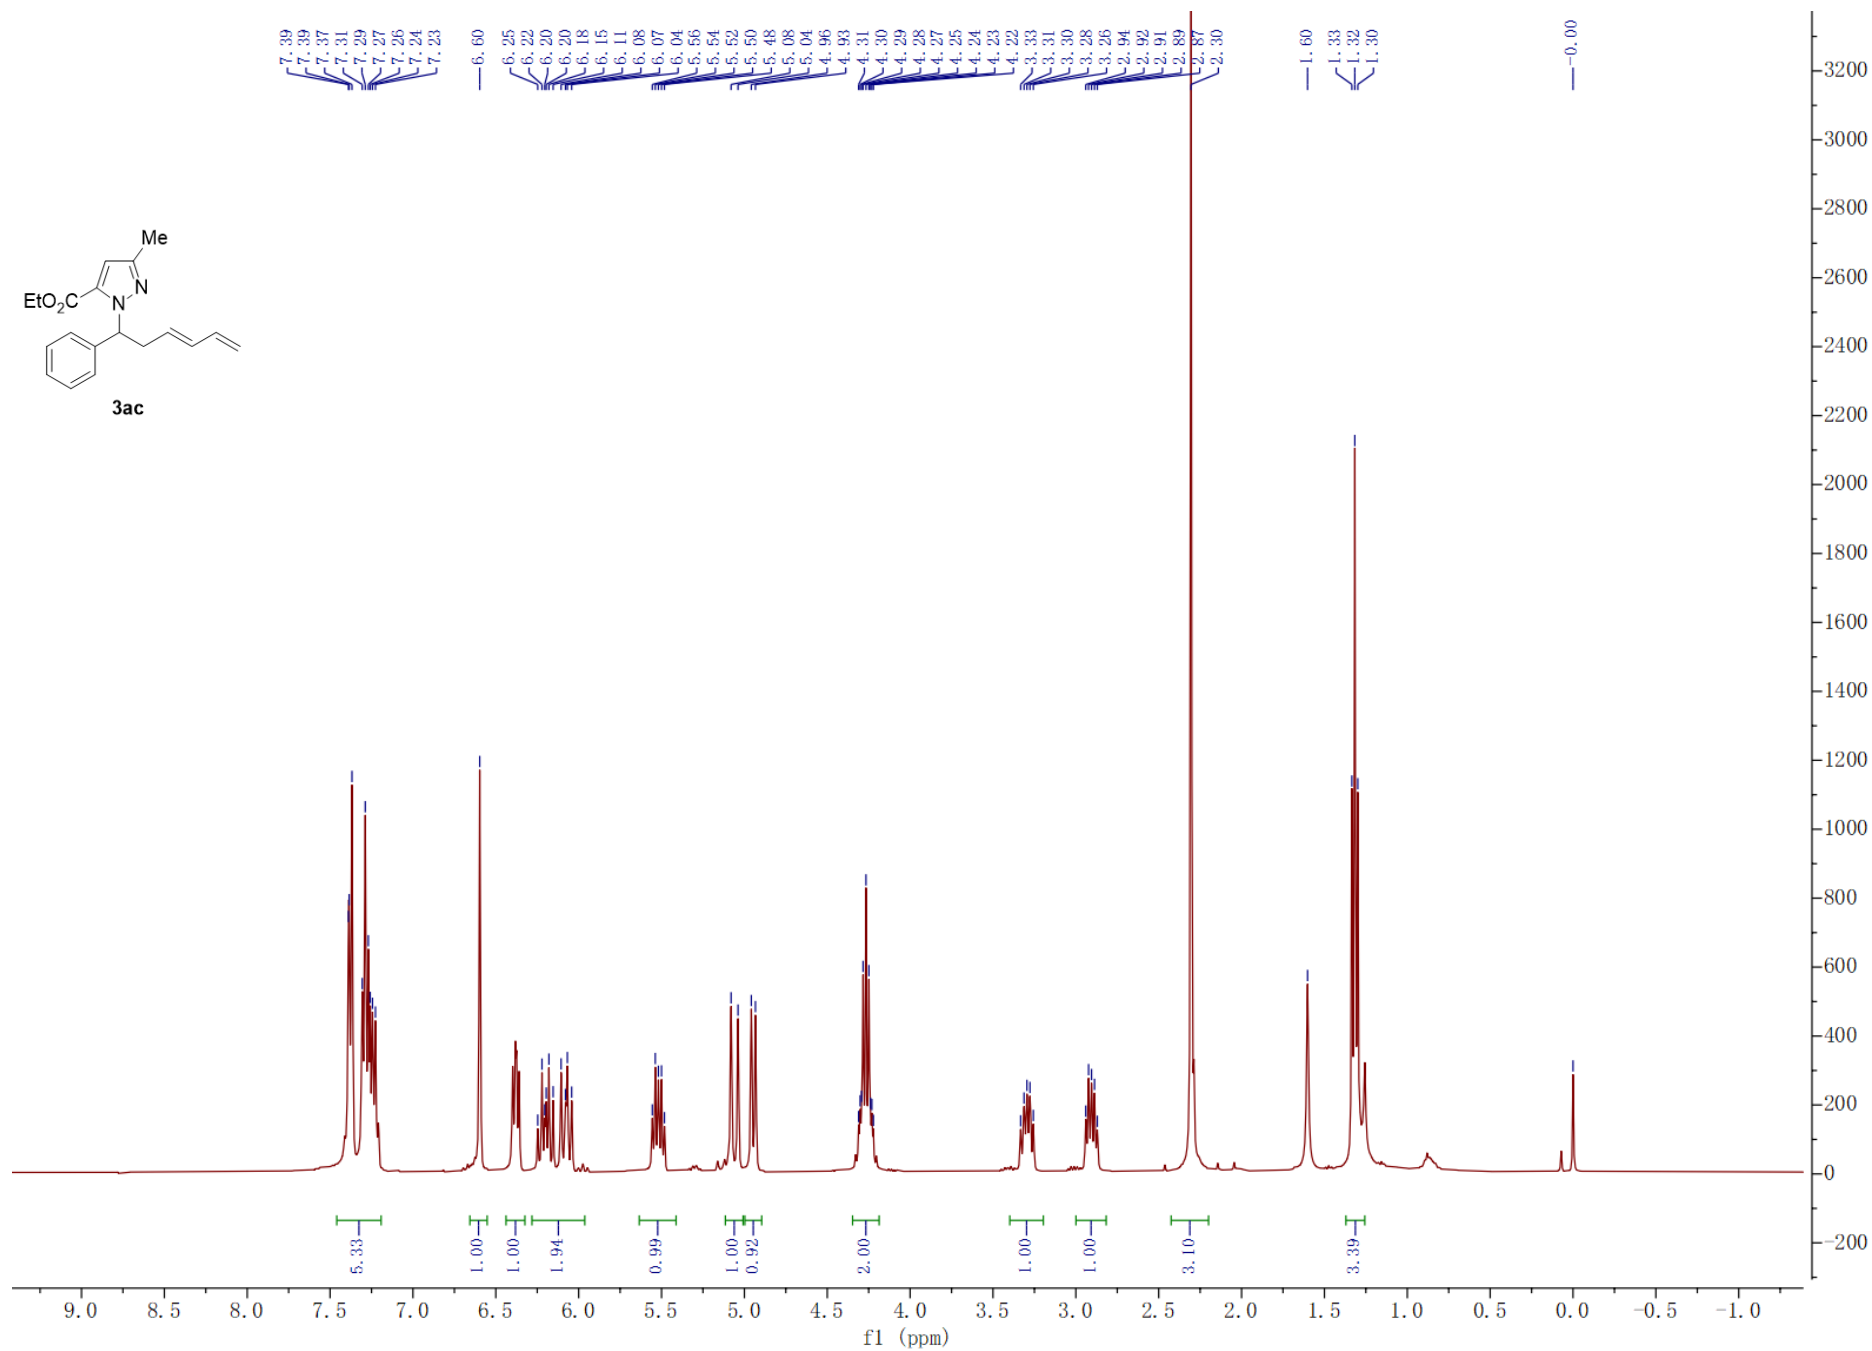

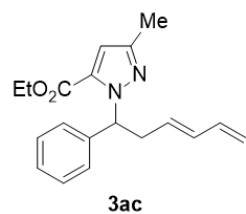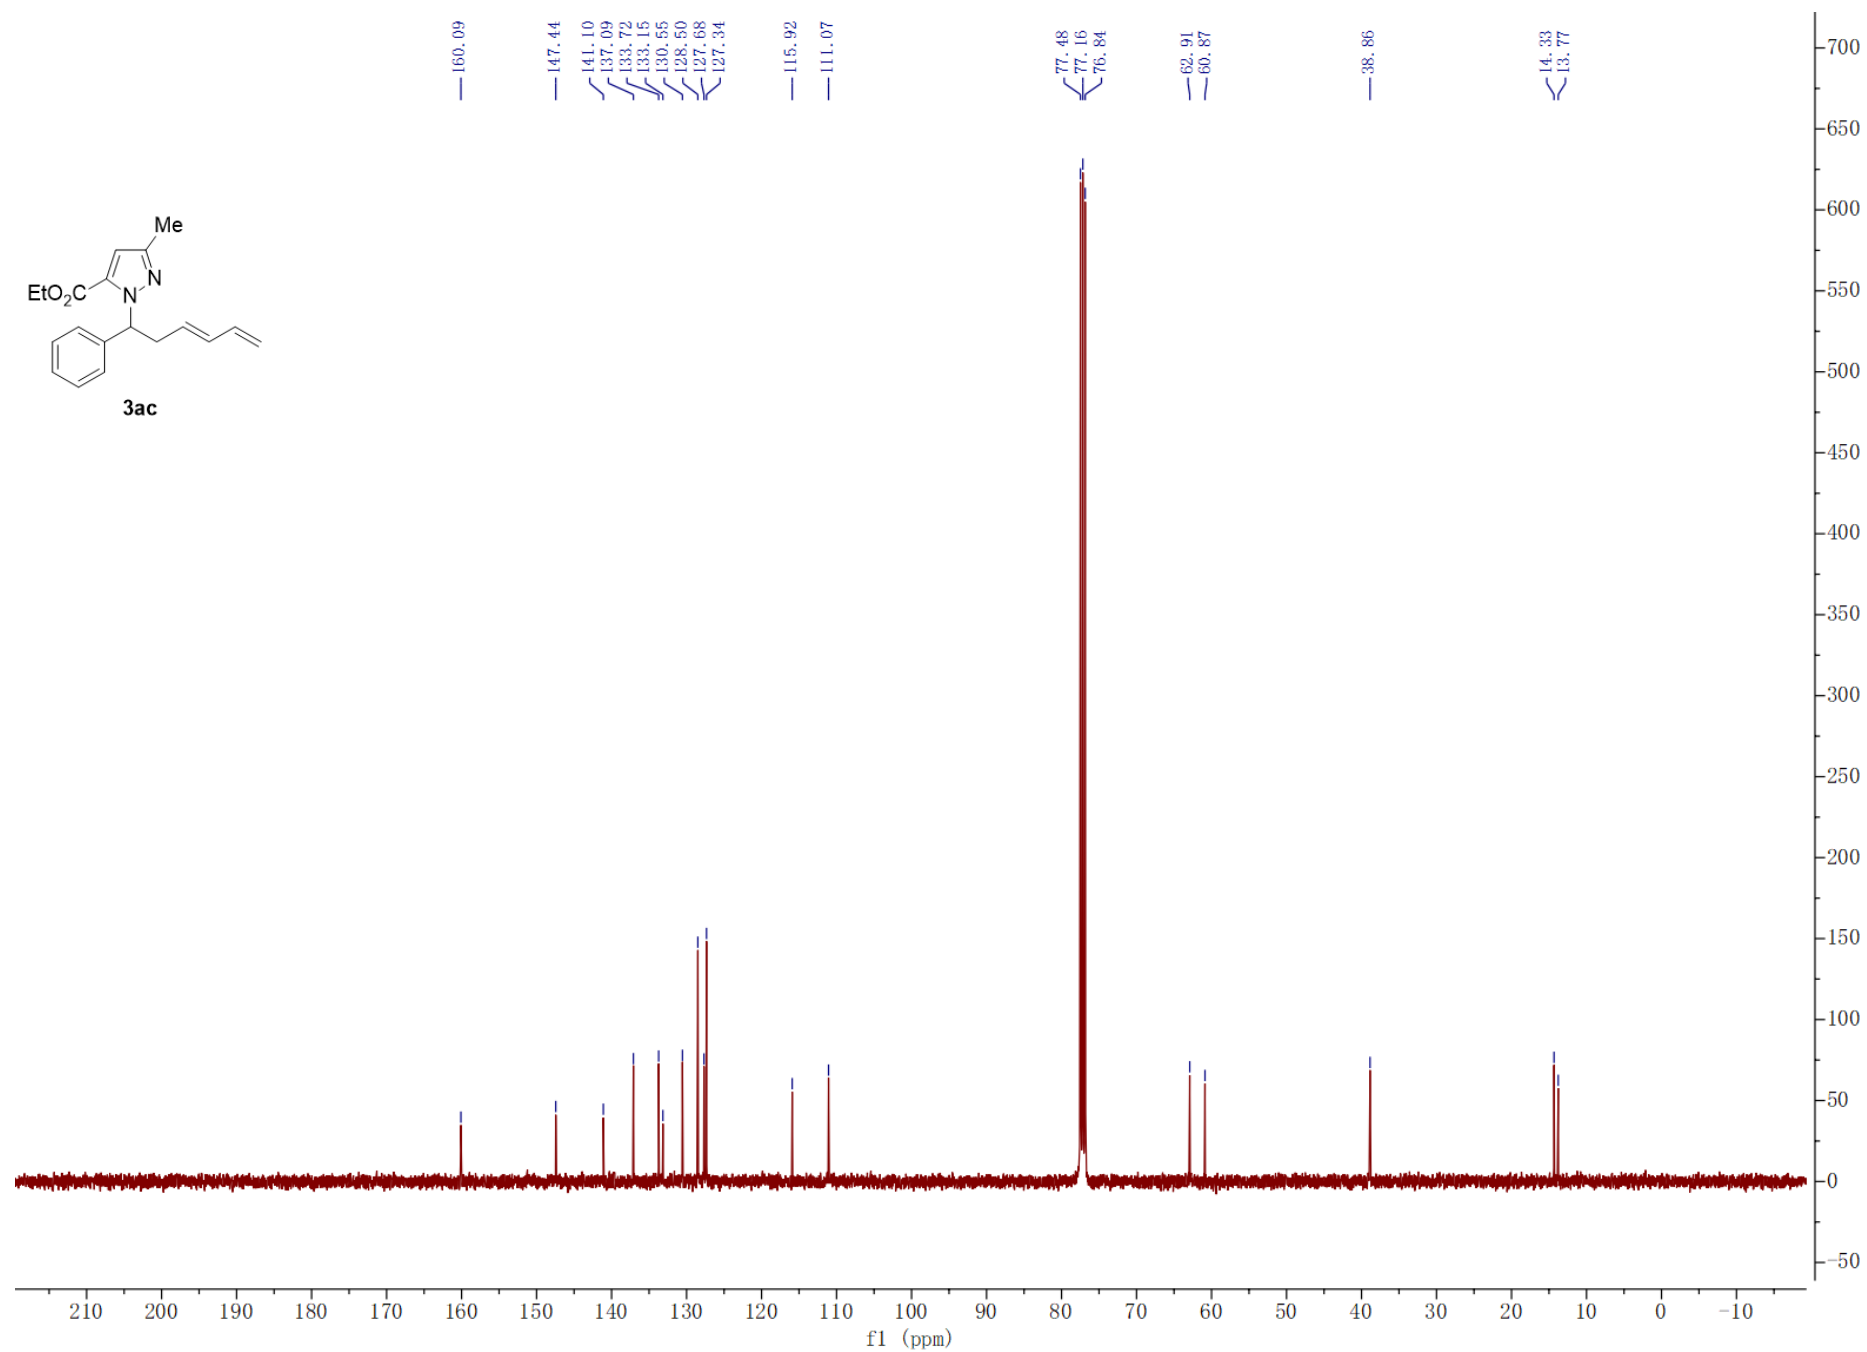

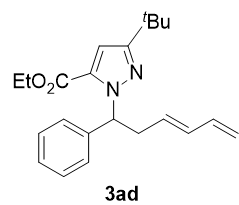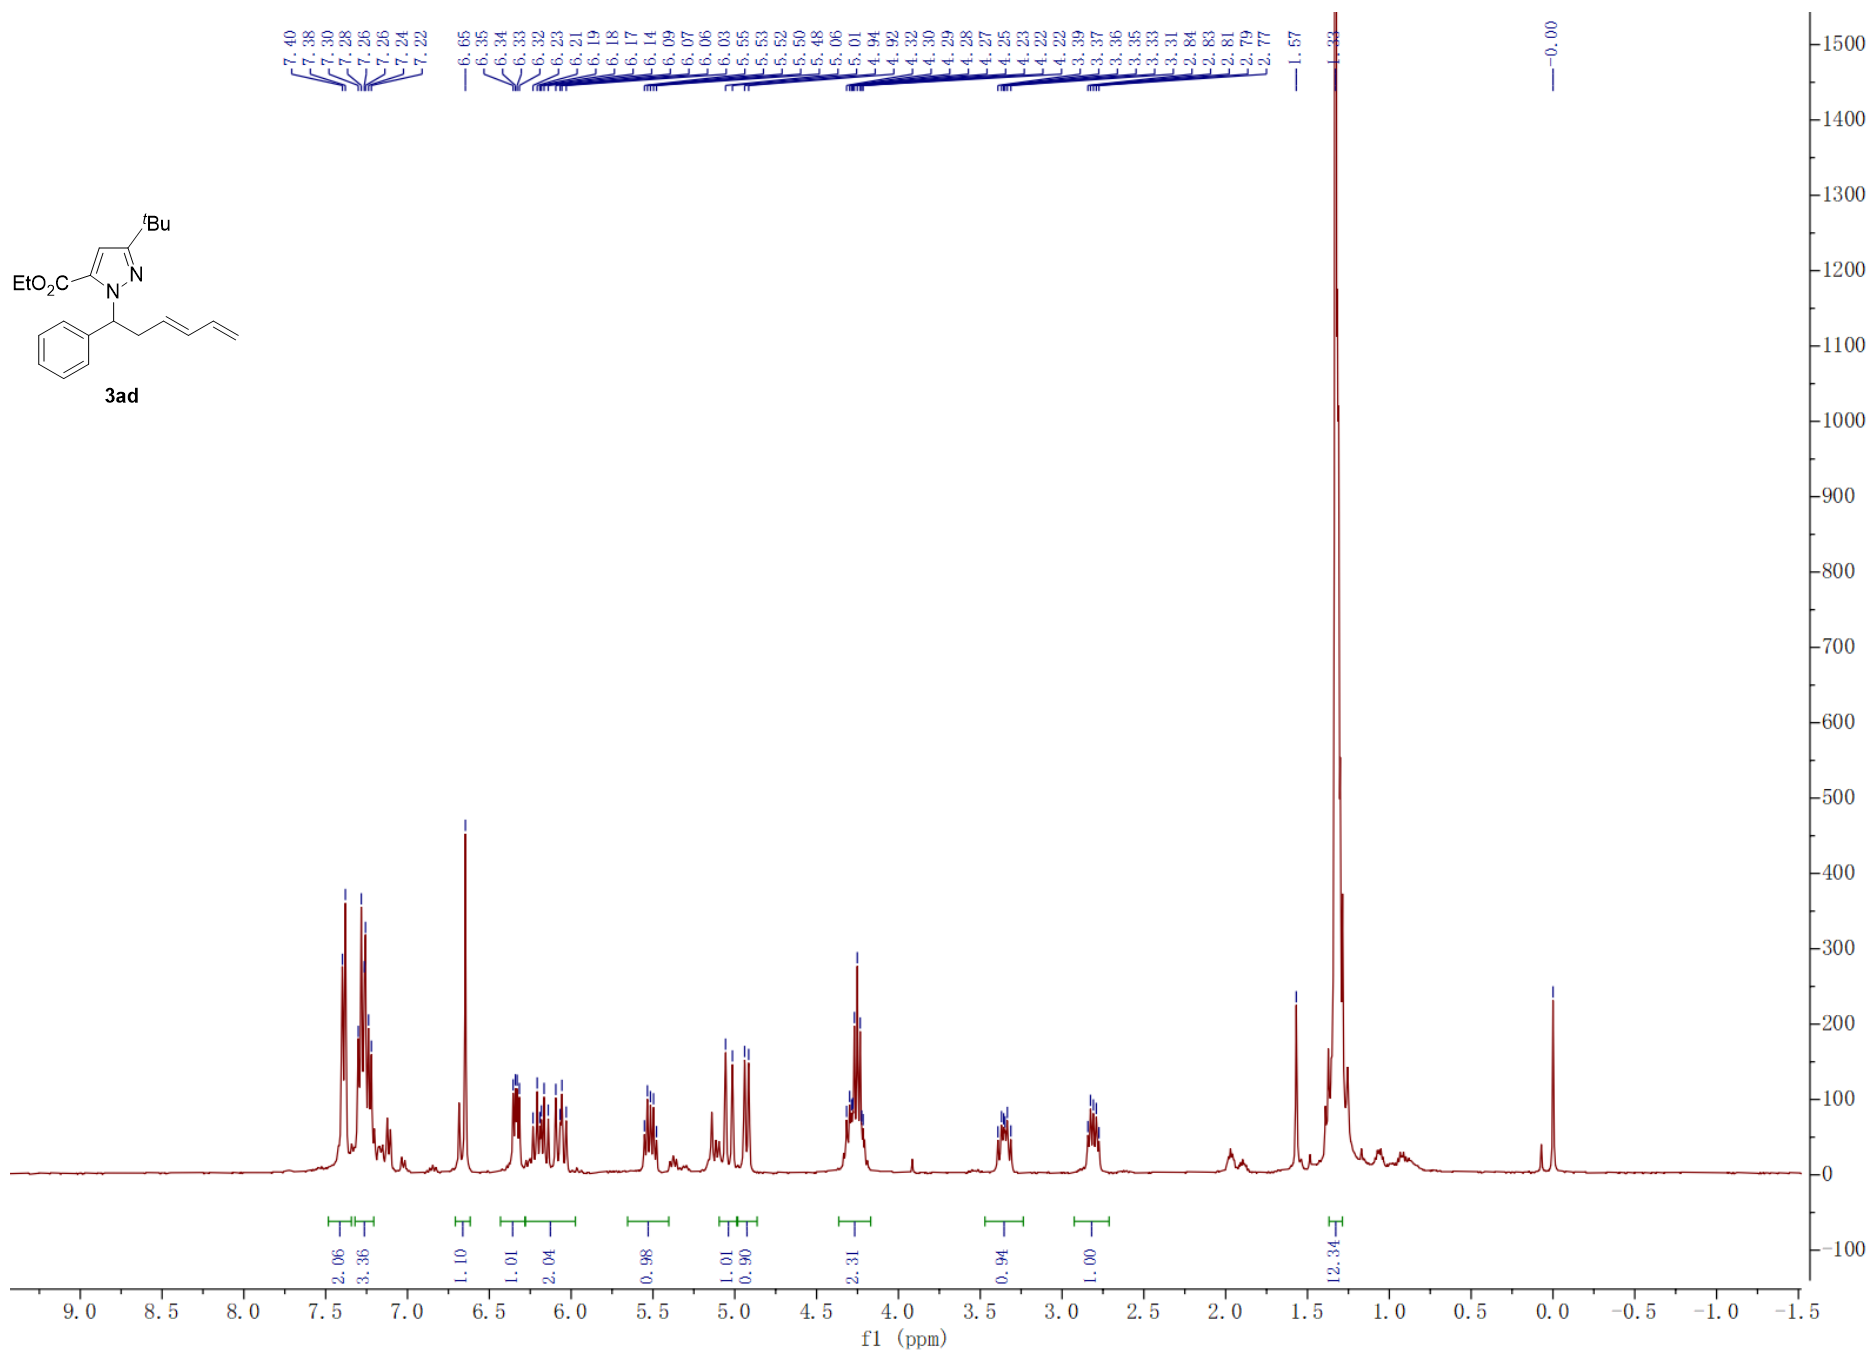



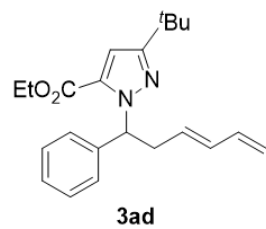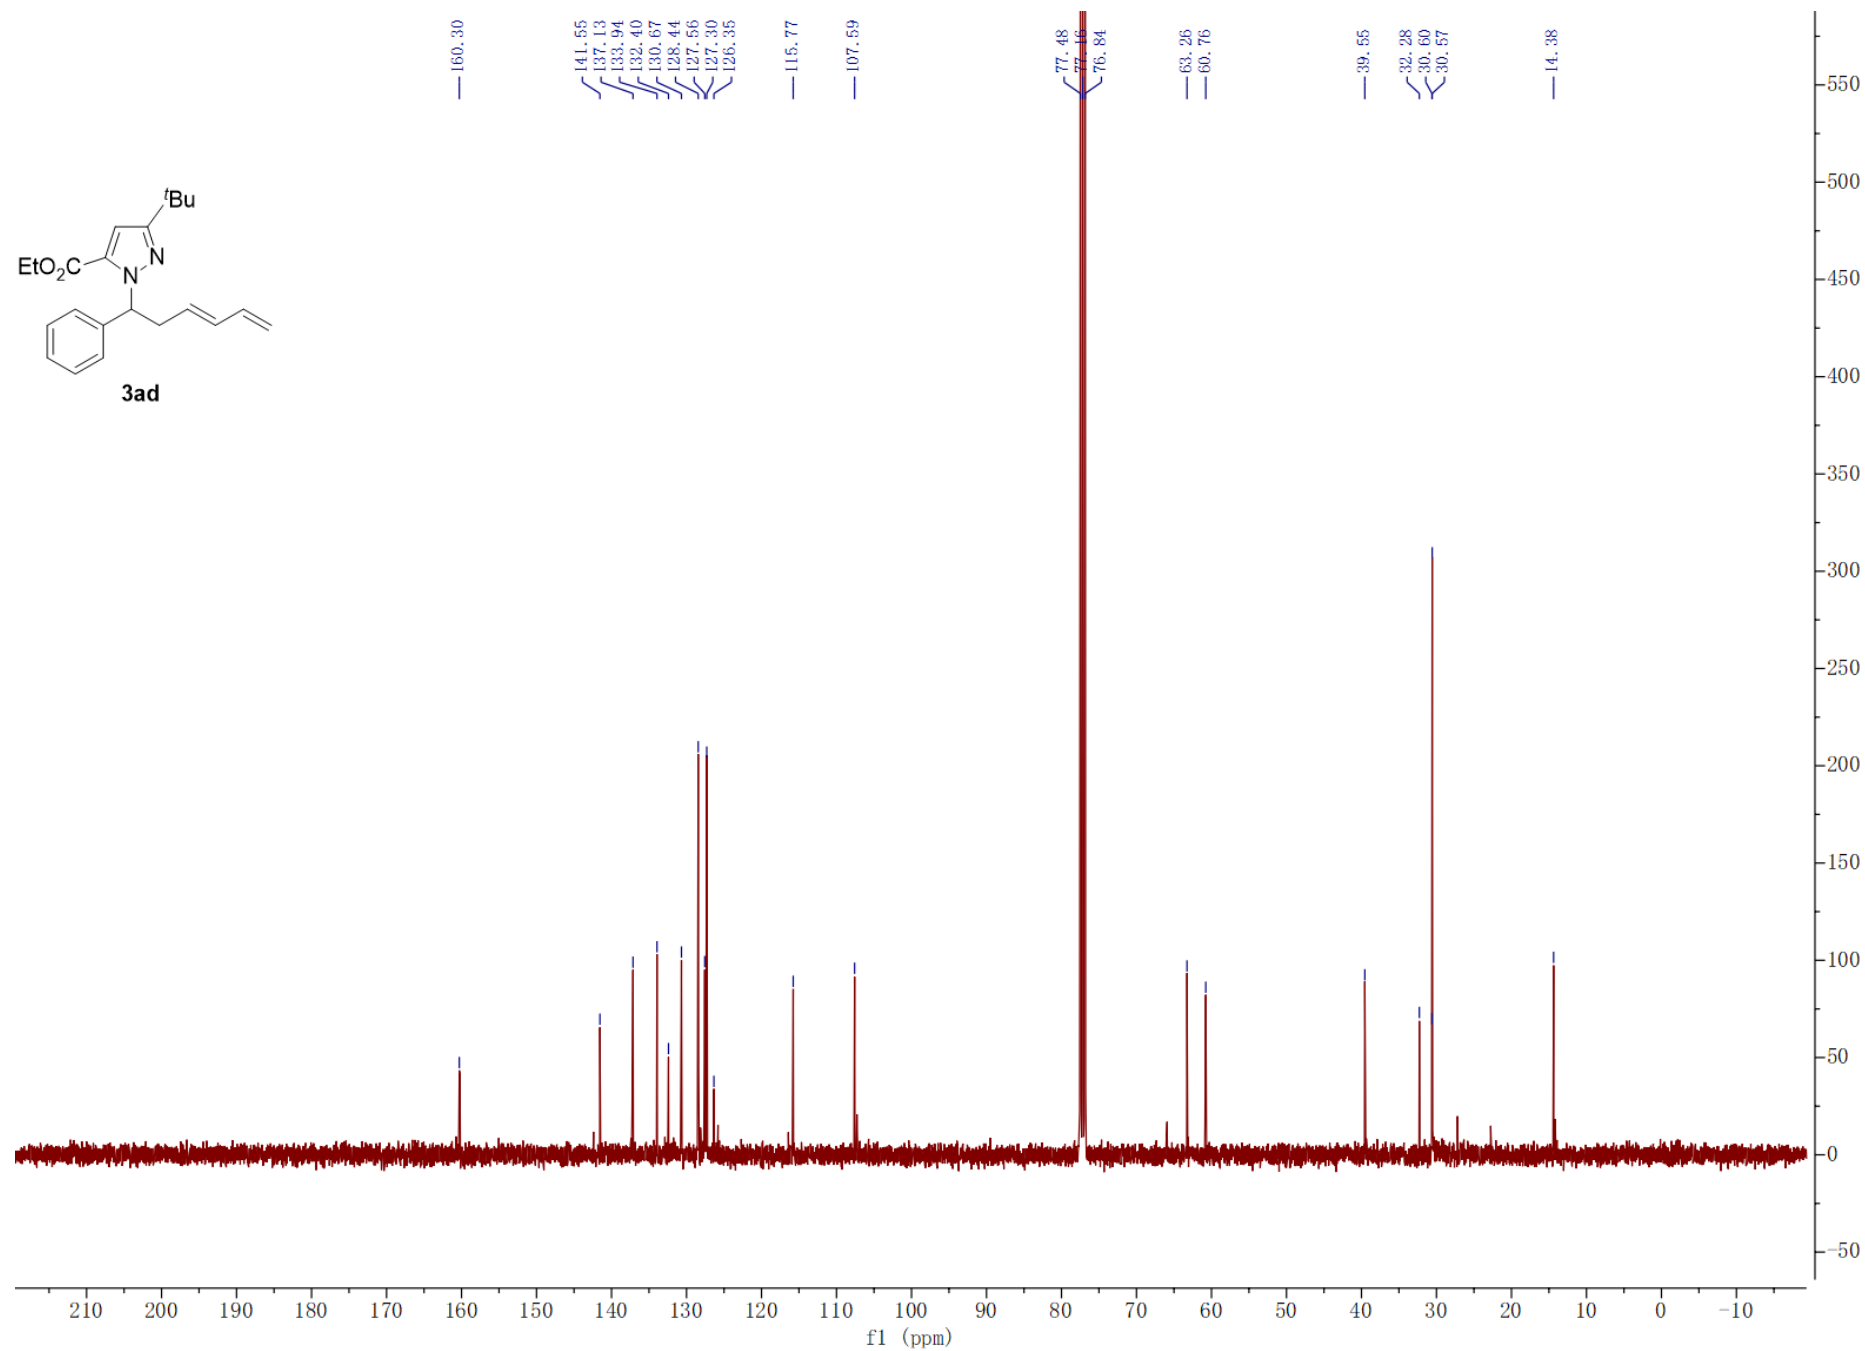

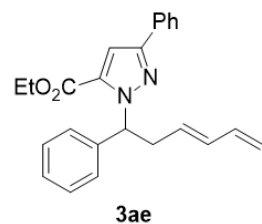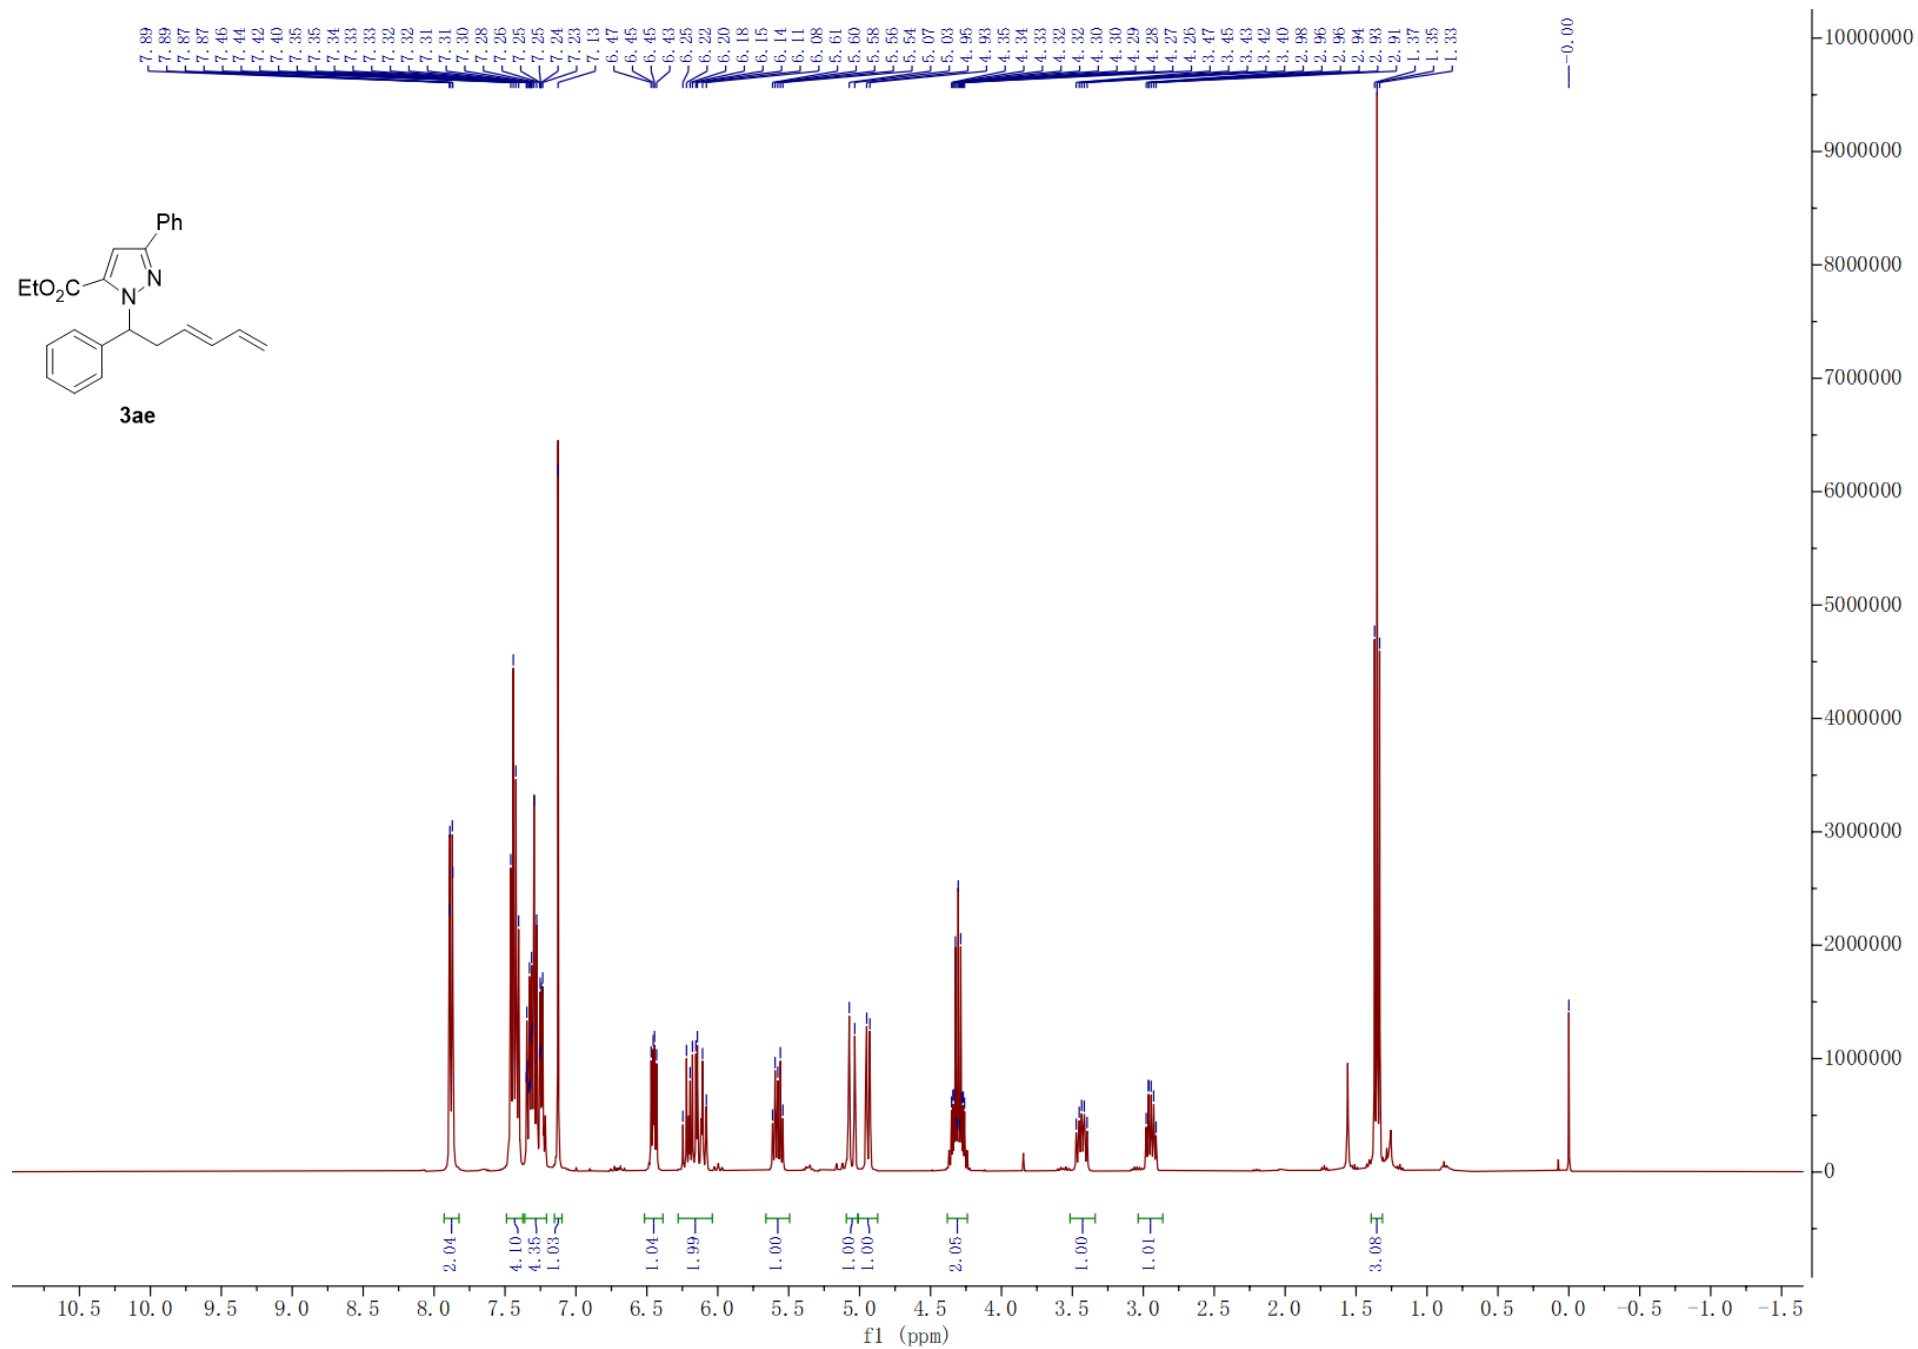

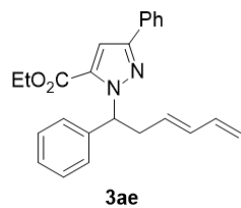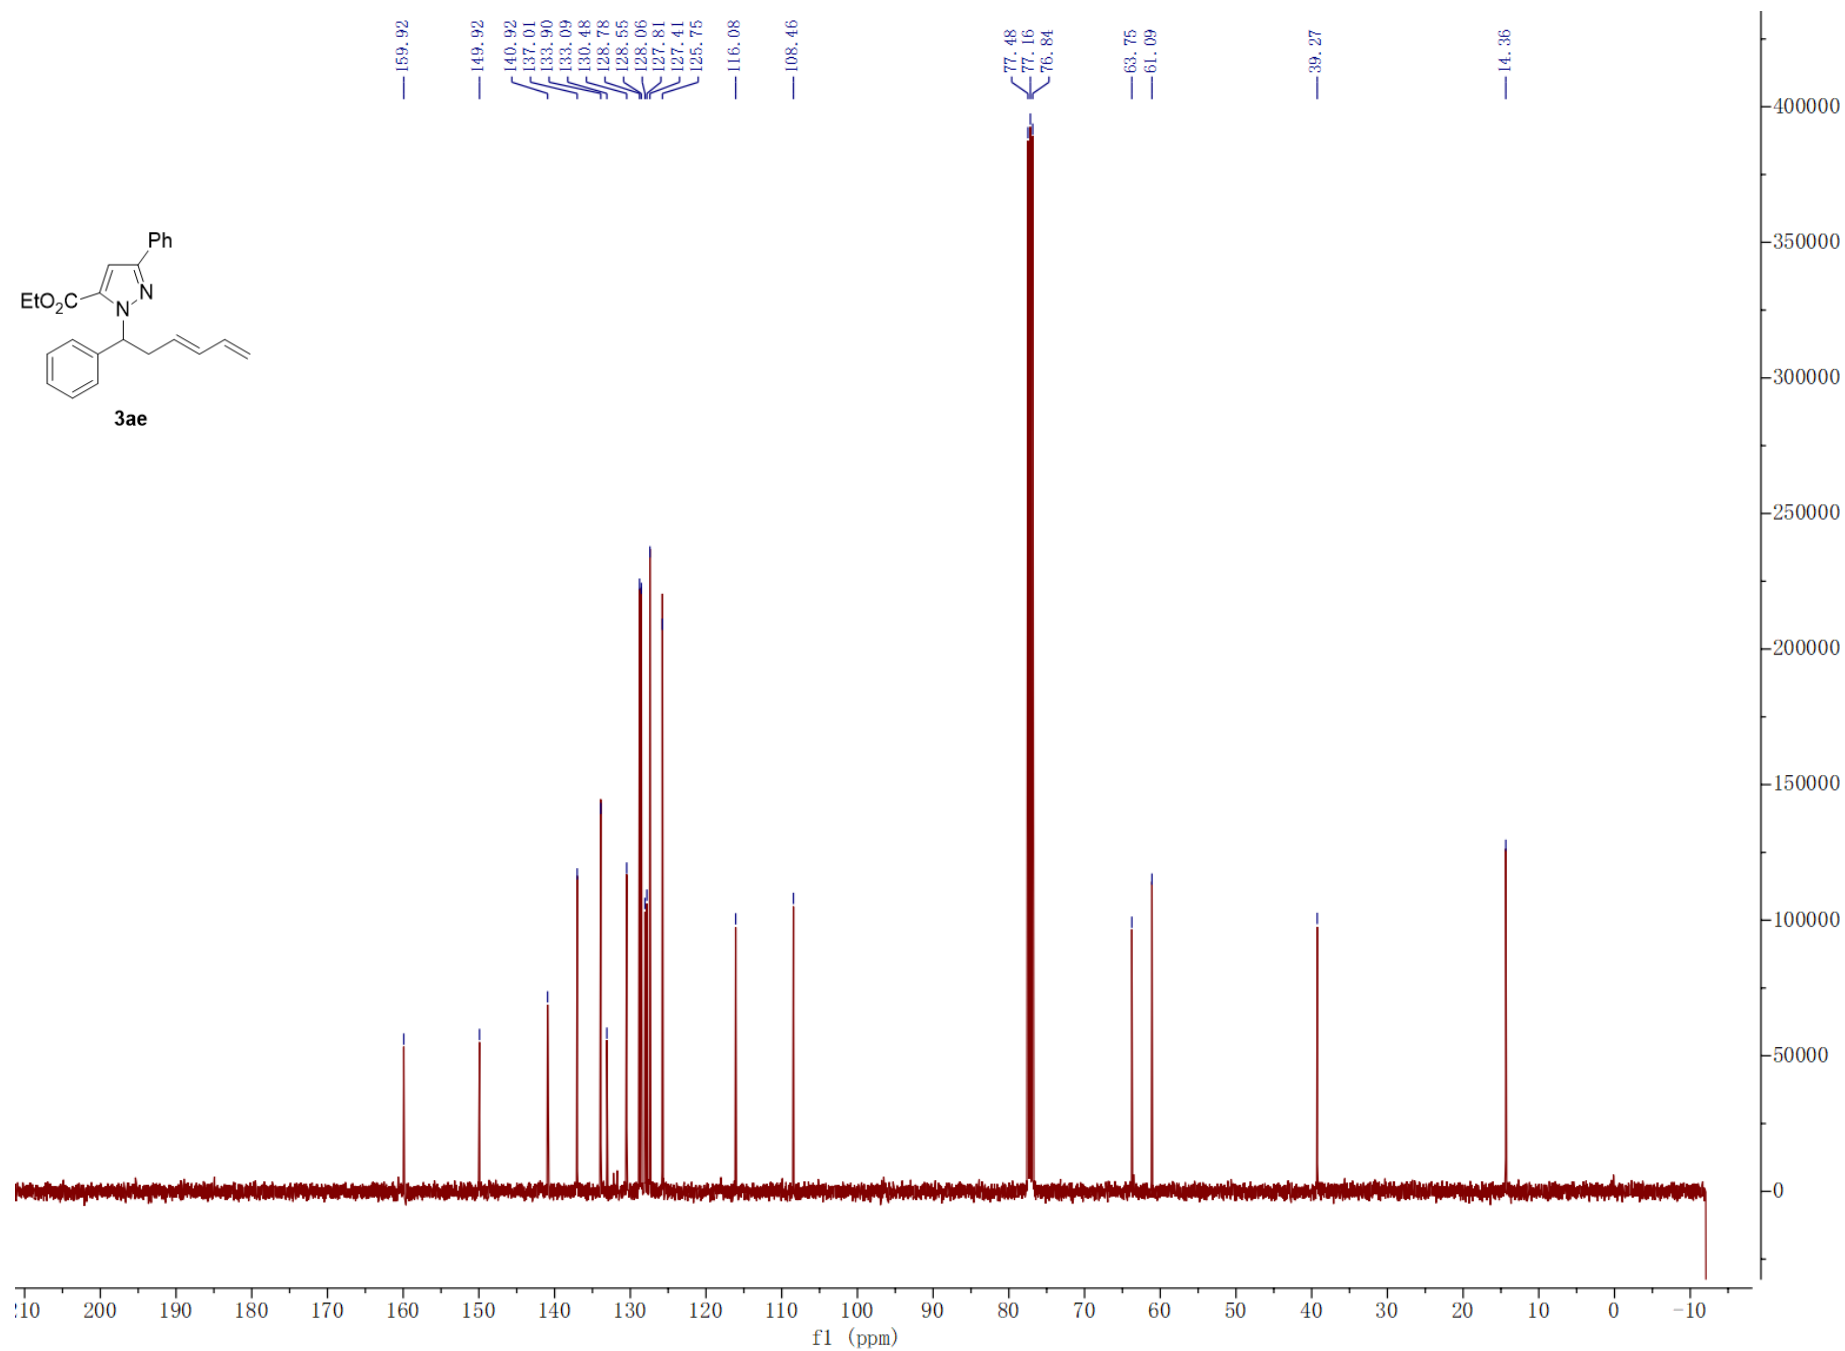

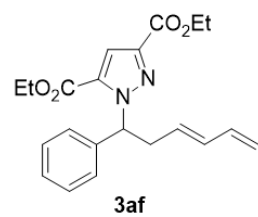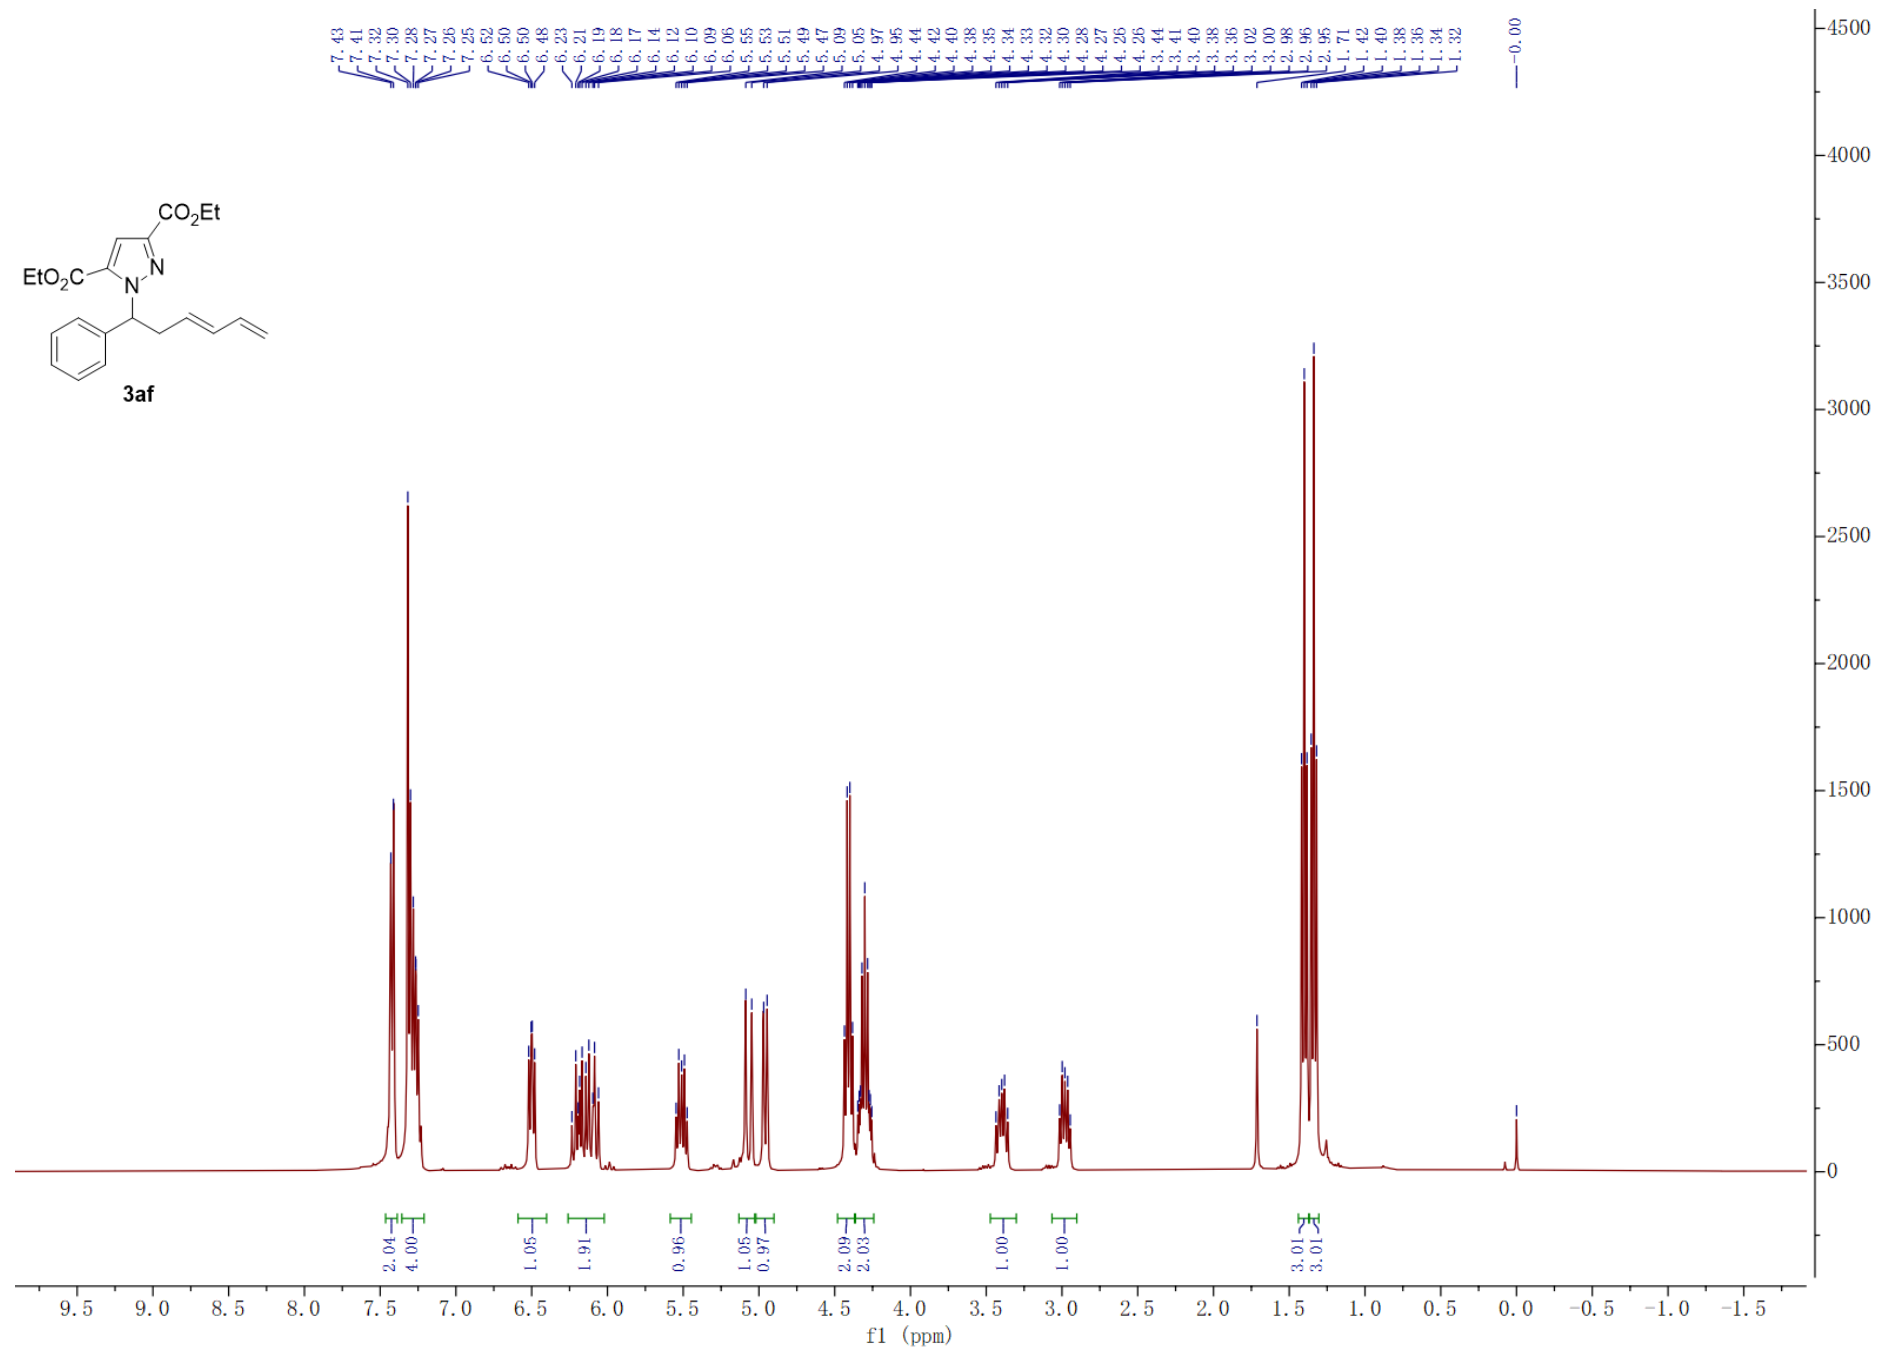

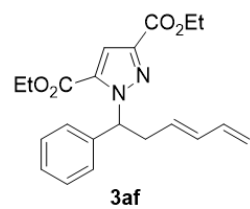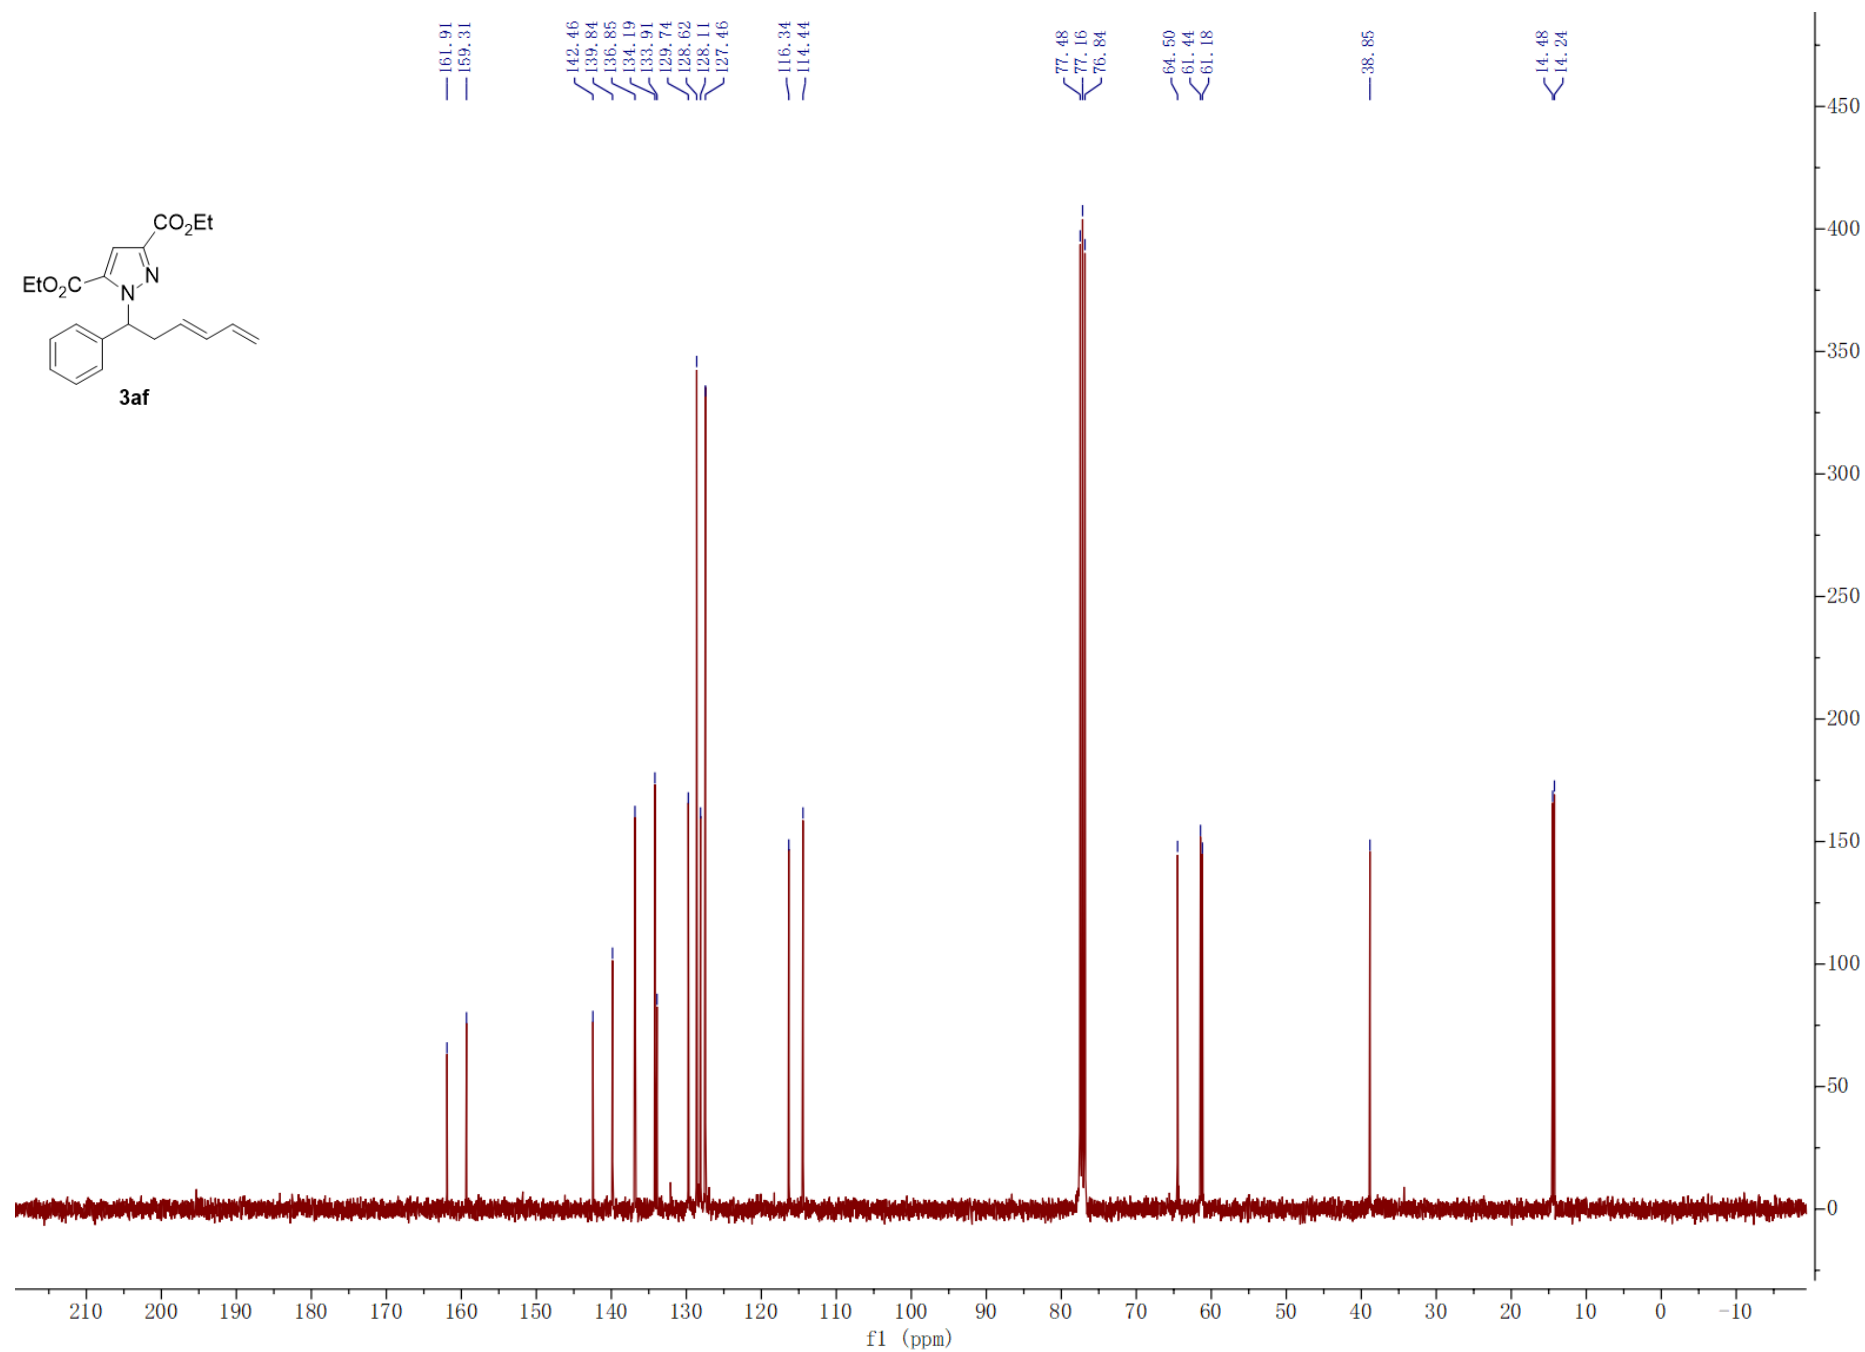

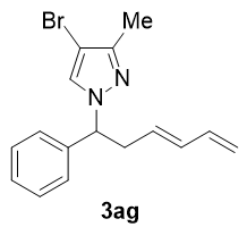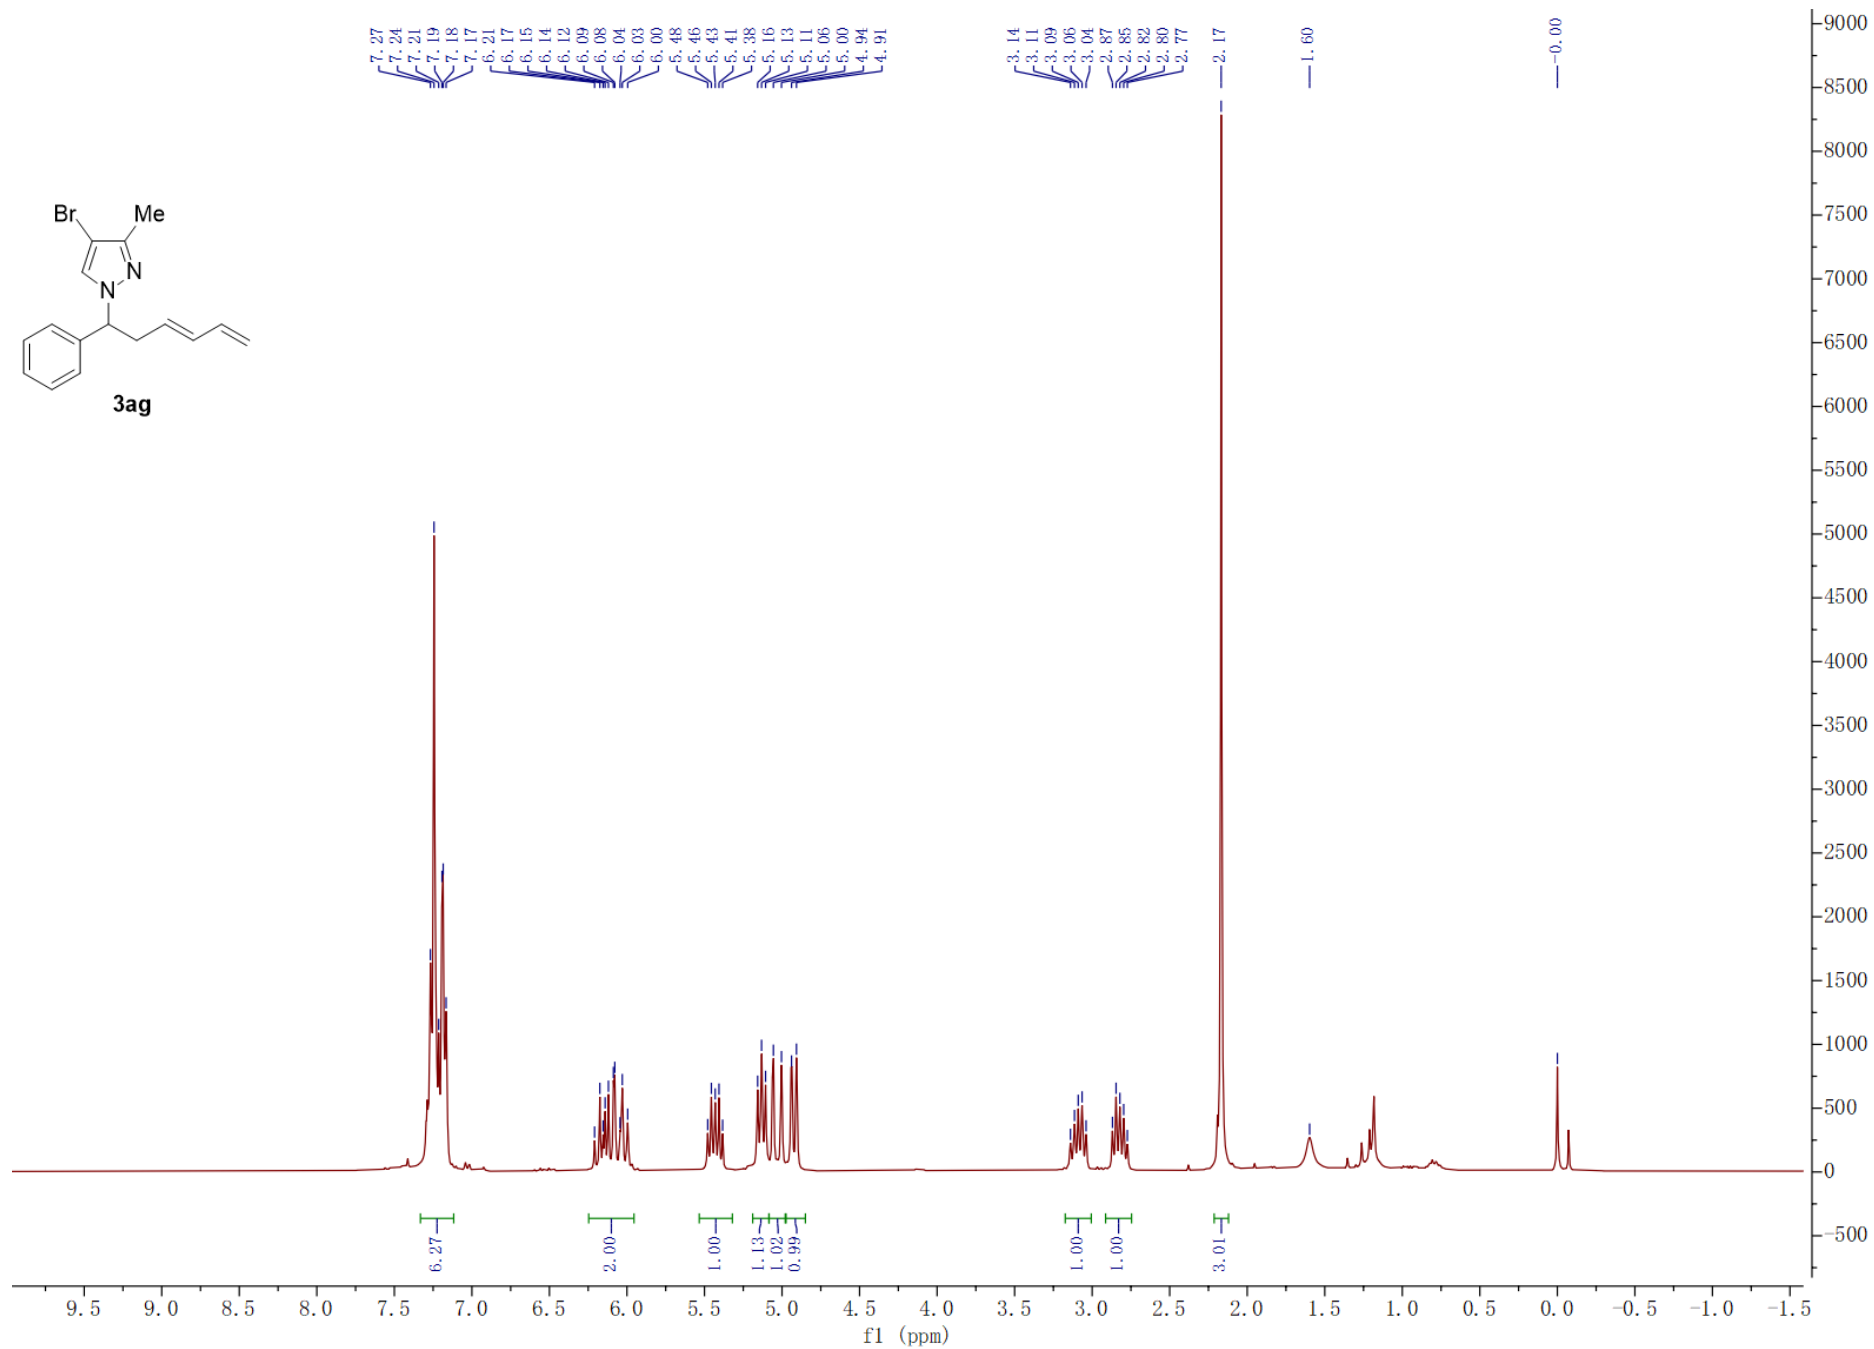

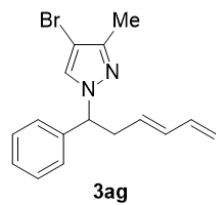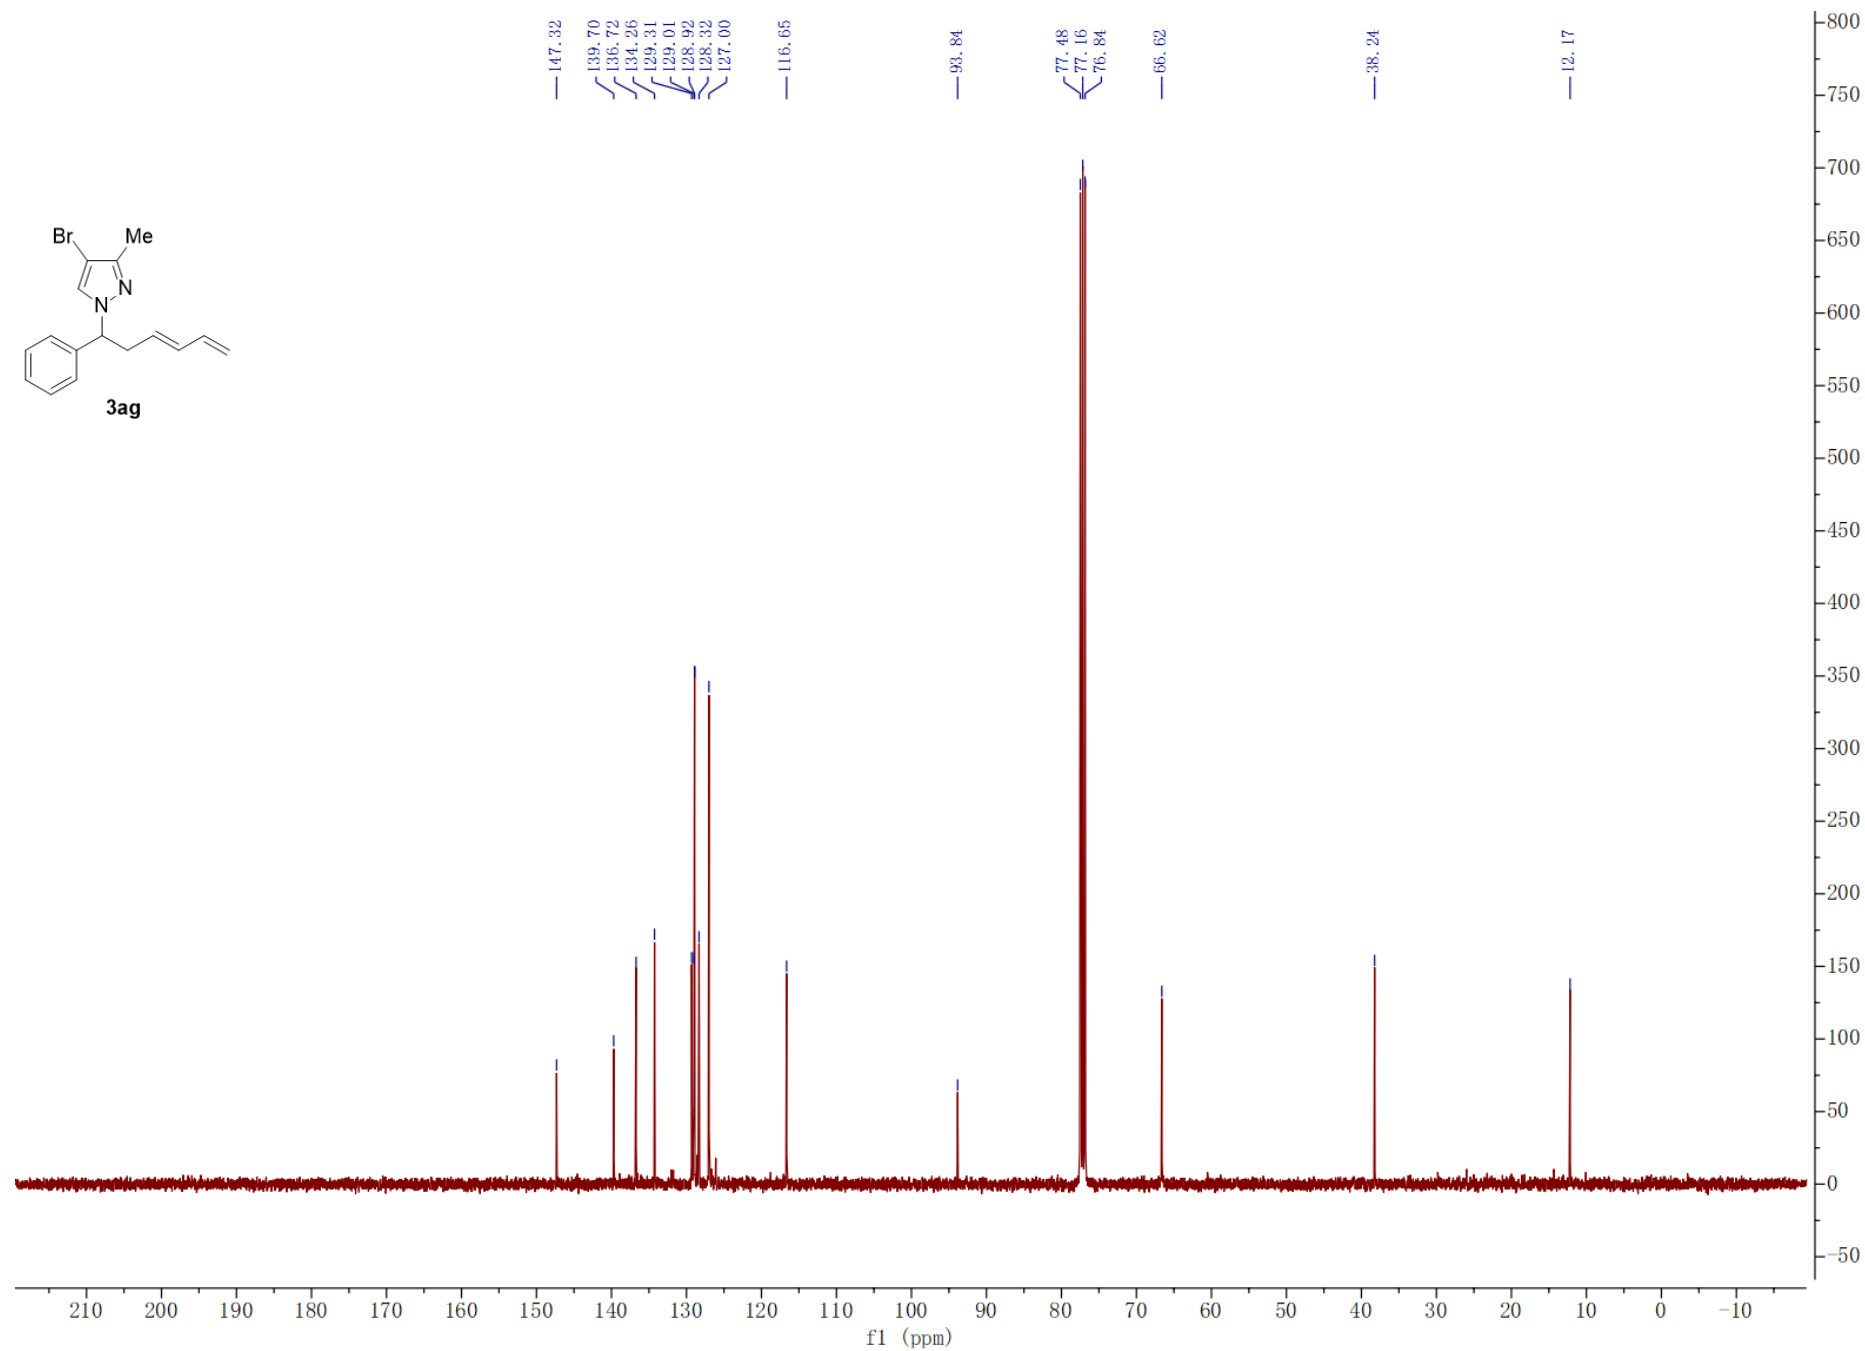

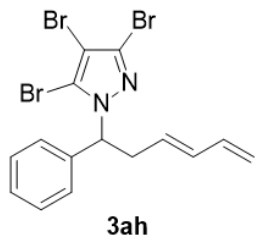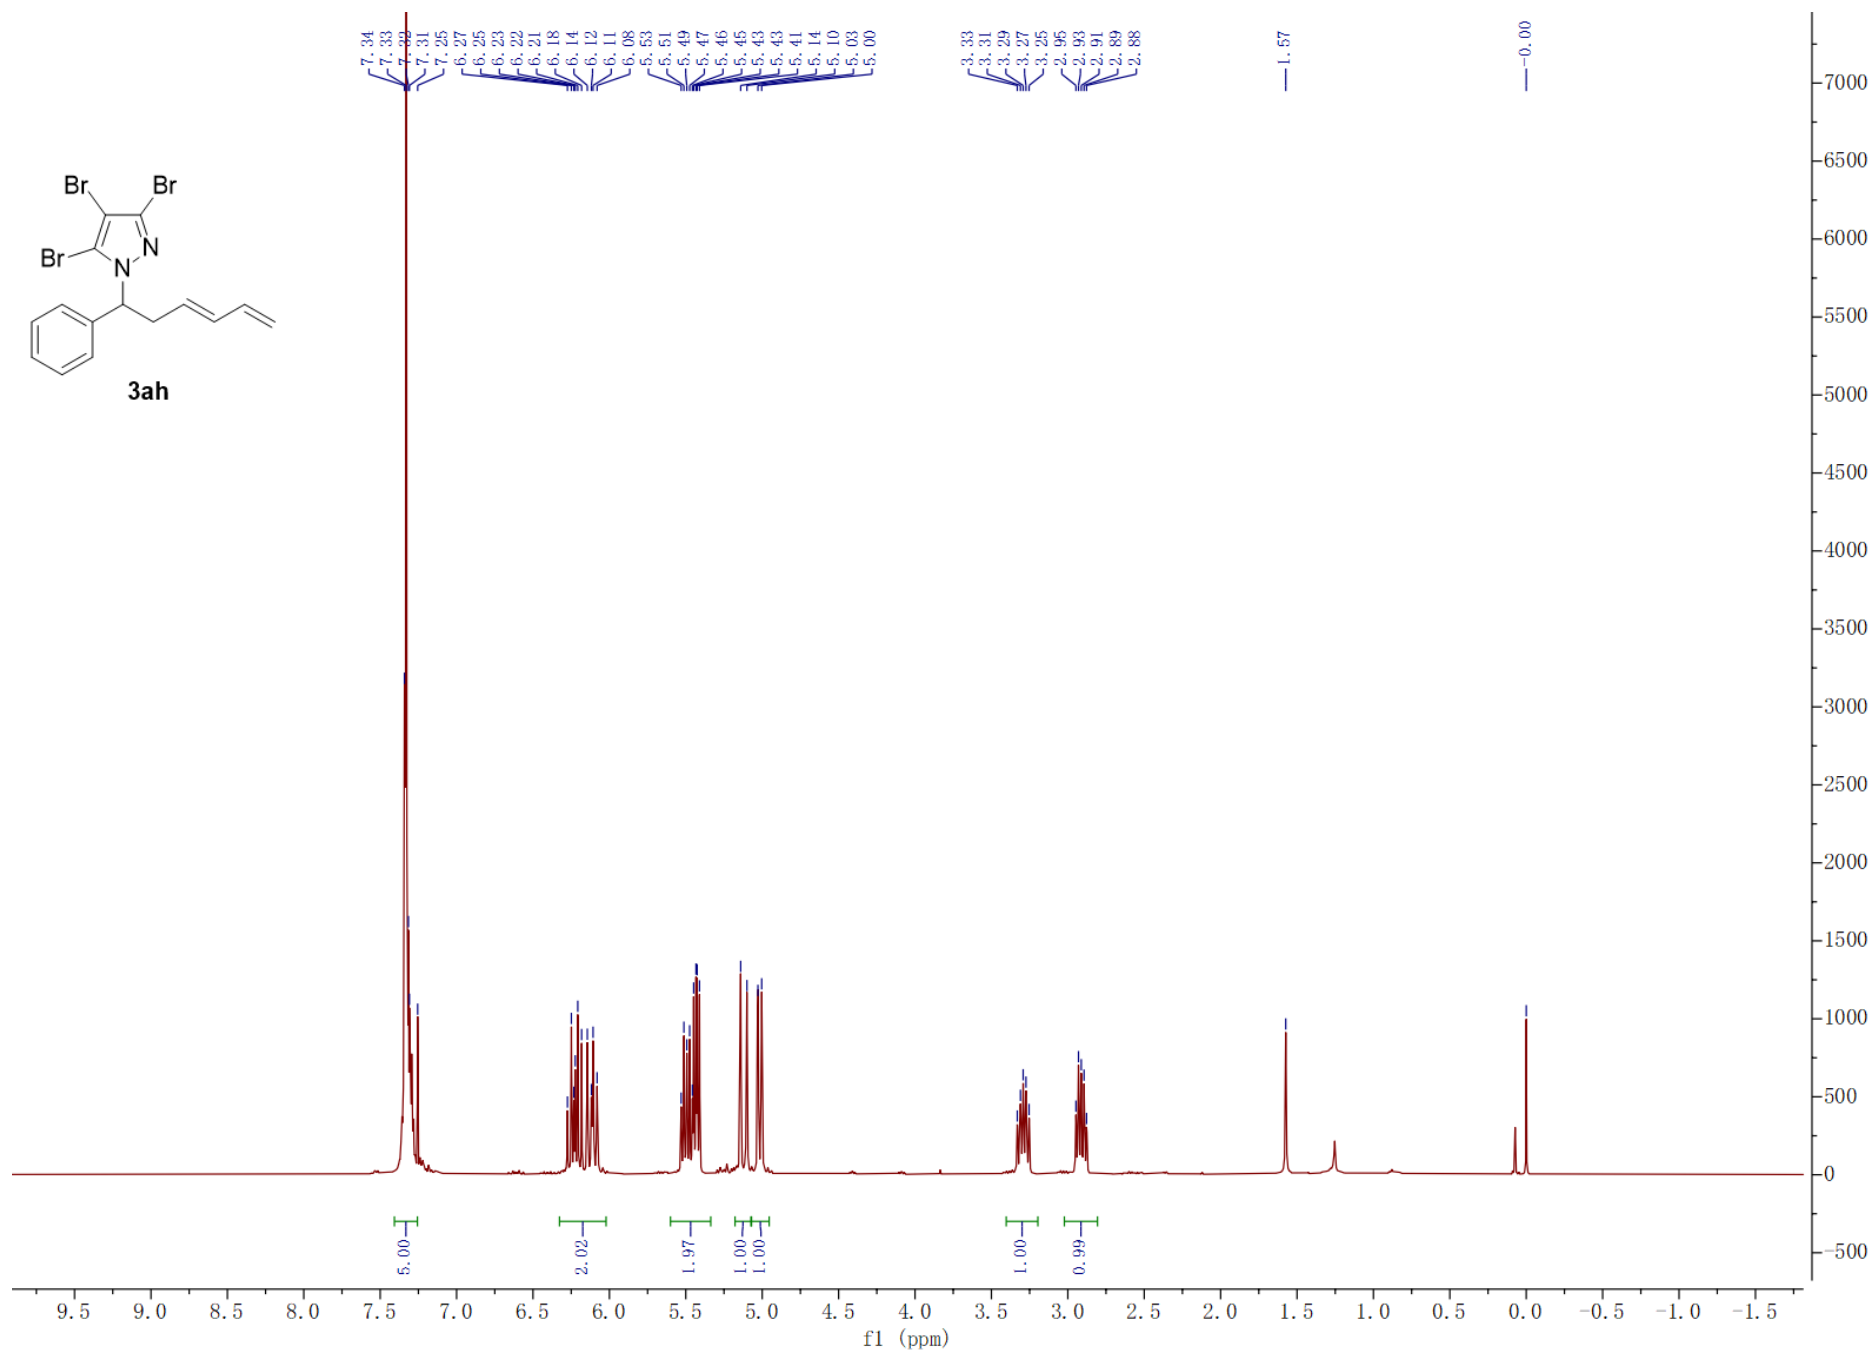



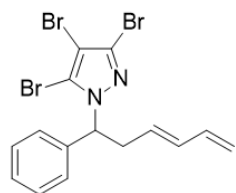

**3ah**

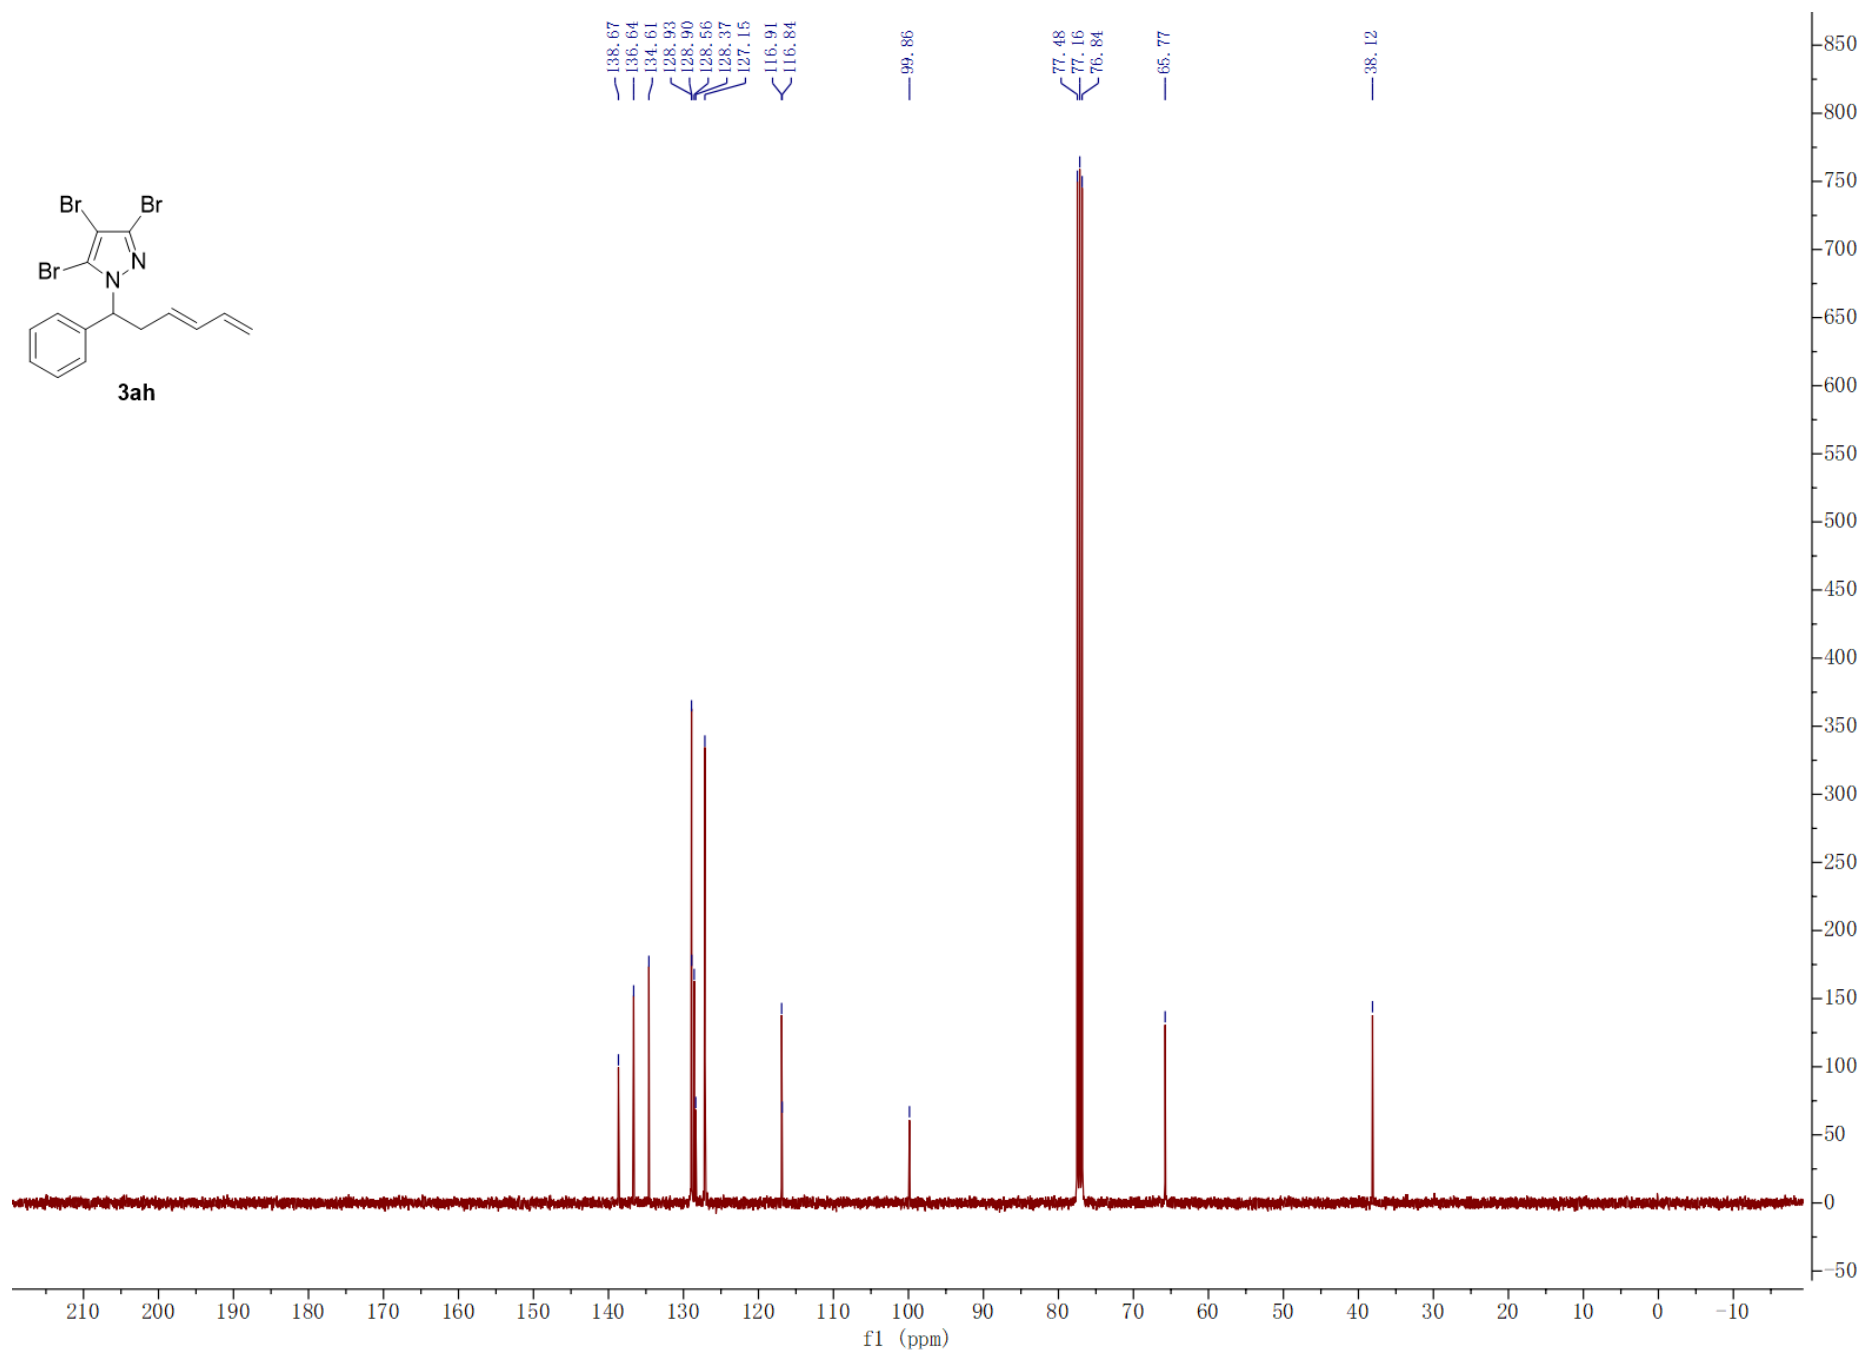

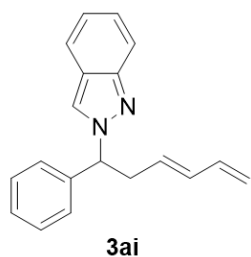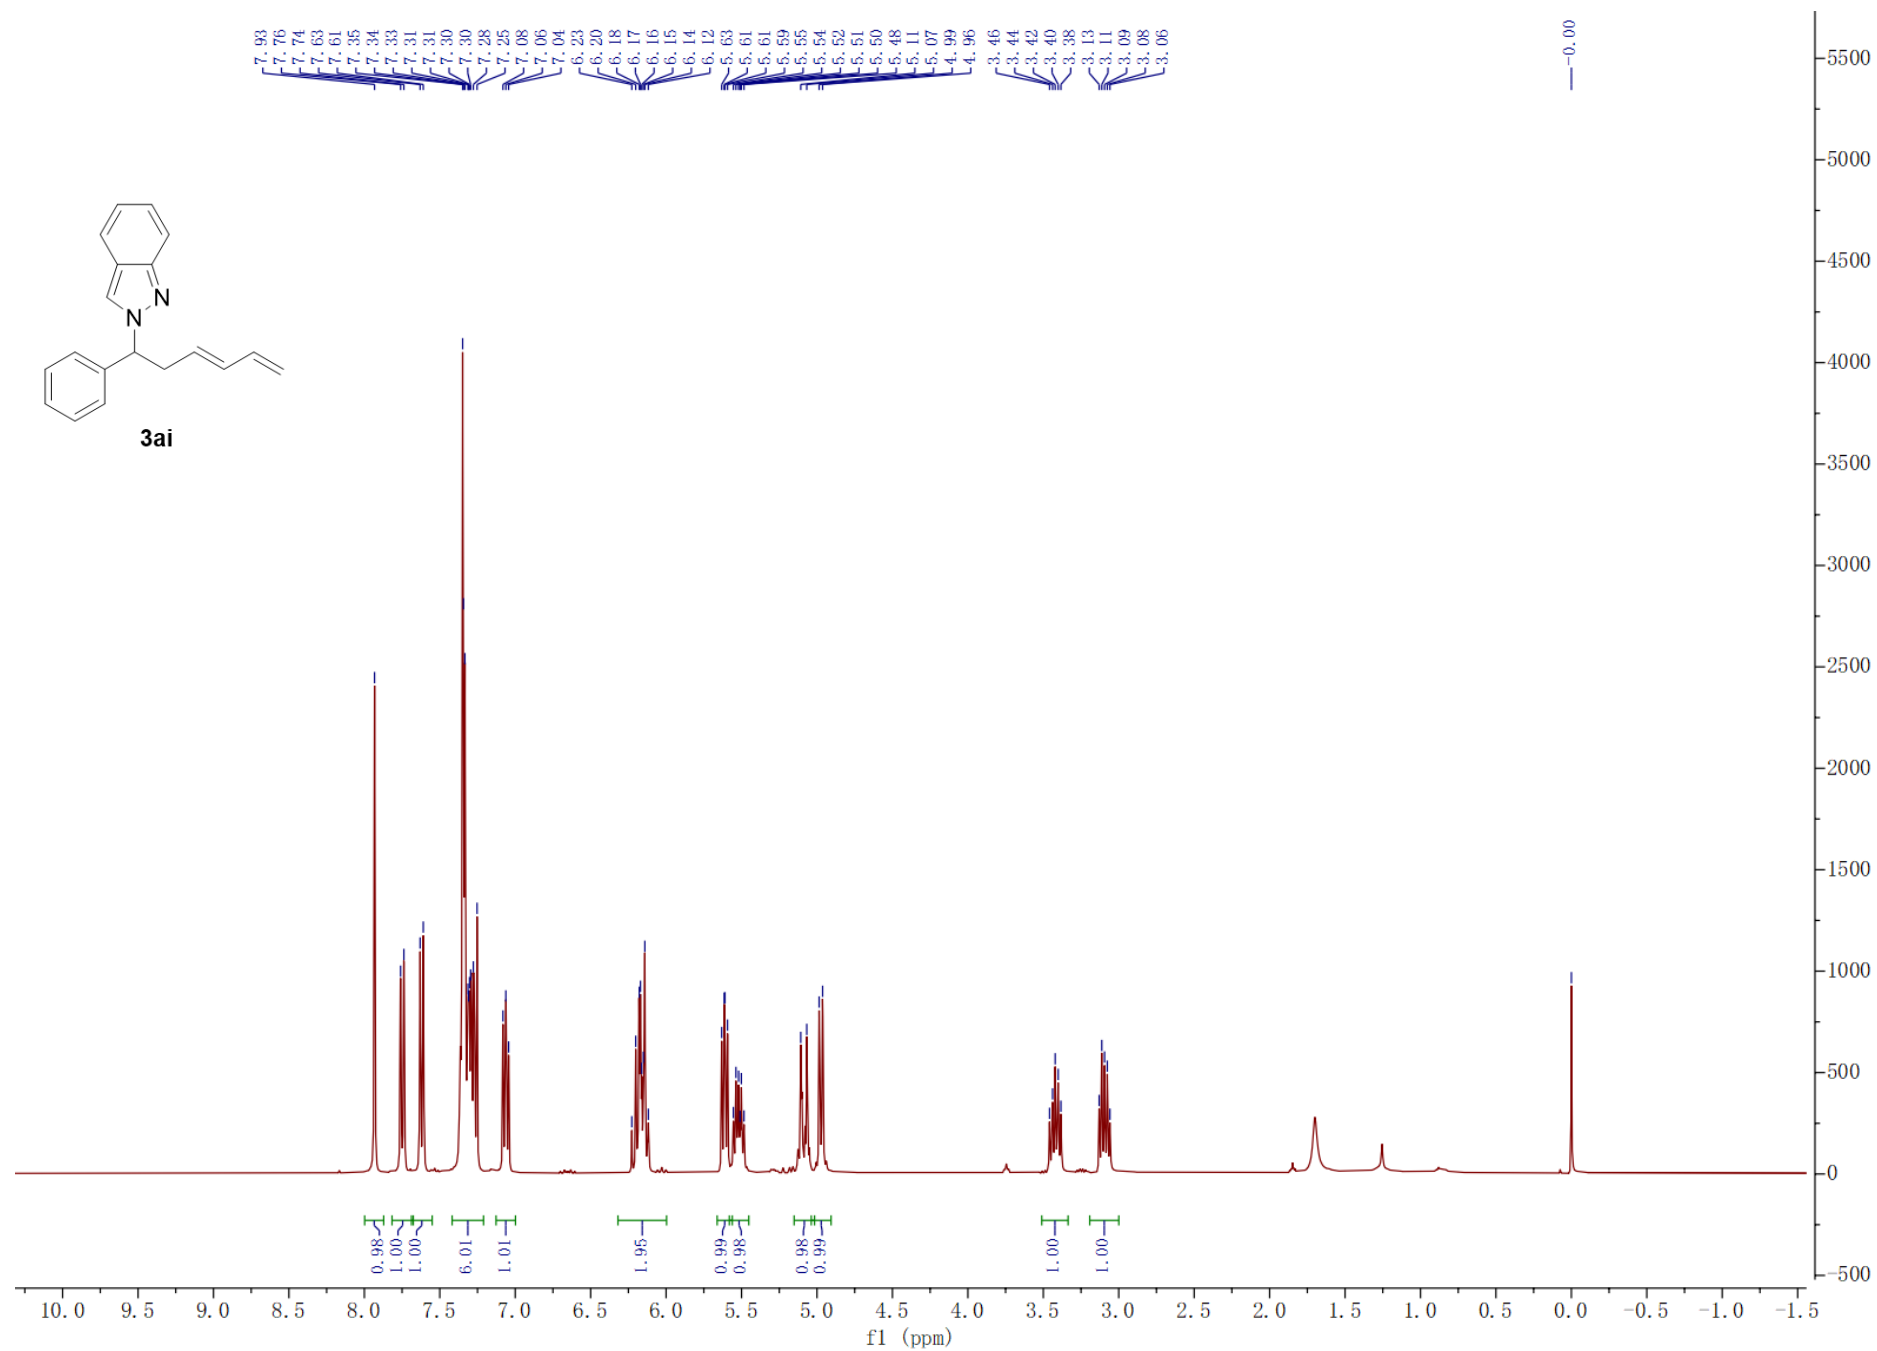

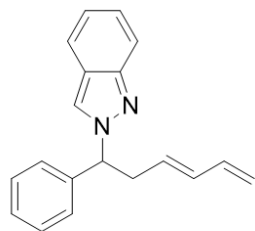

**3ai**

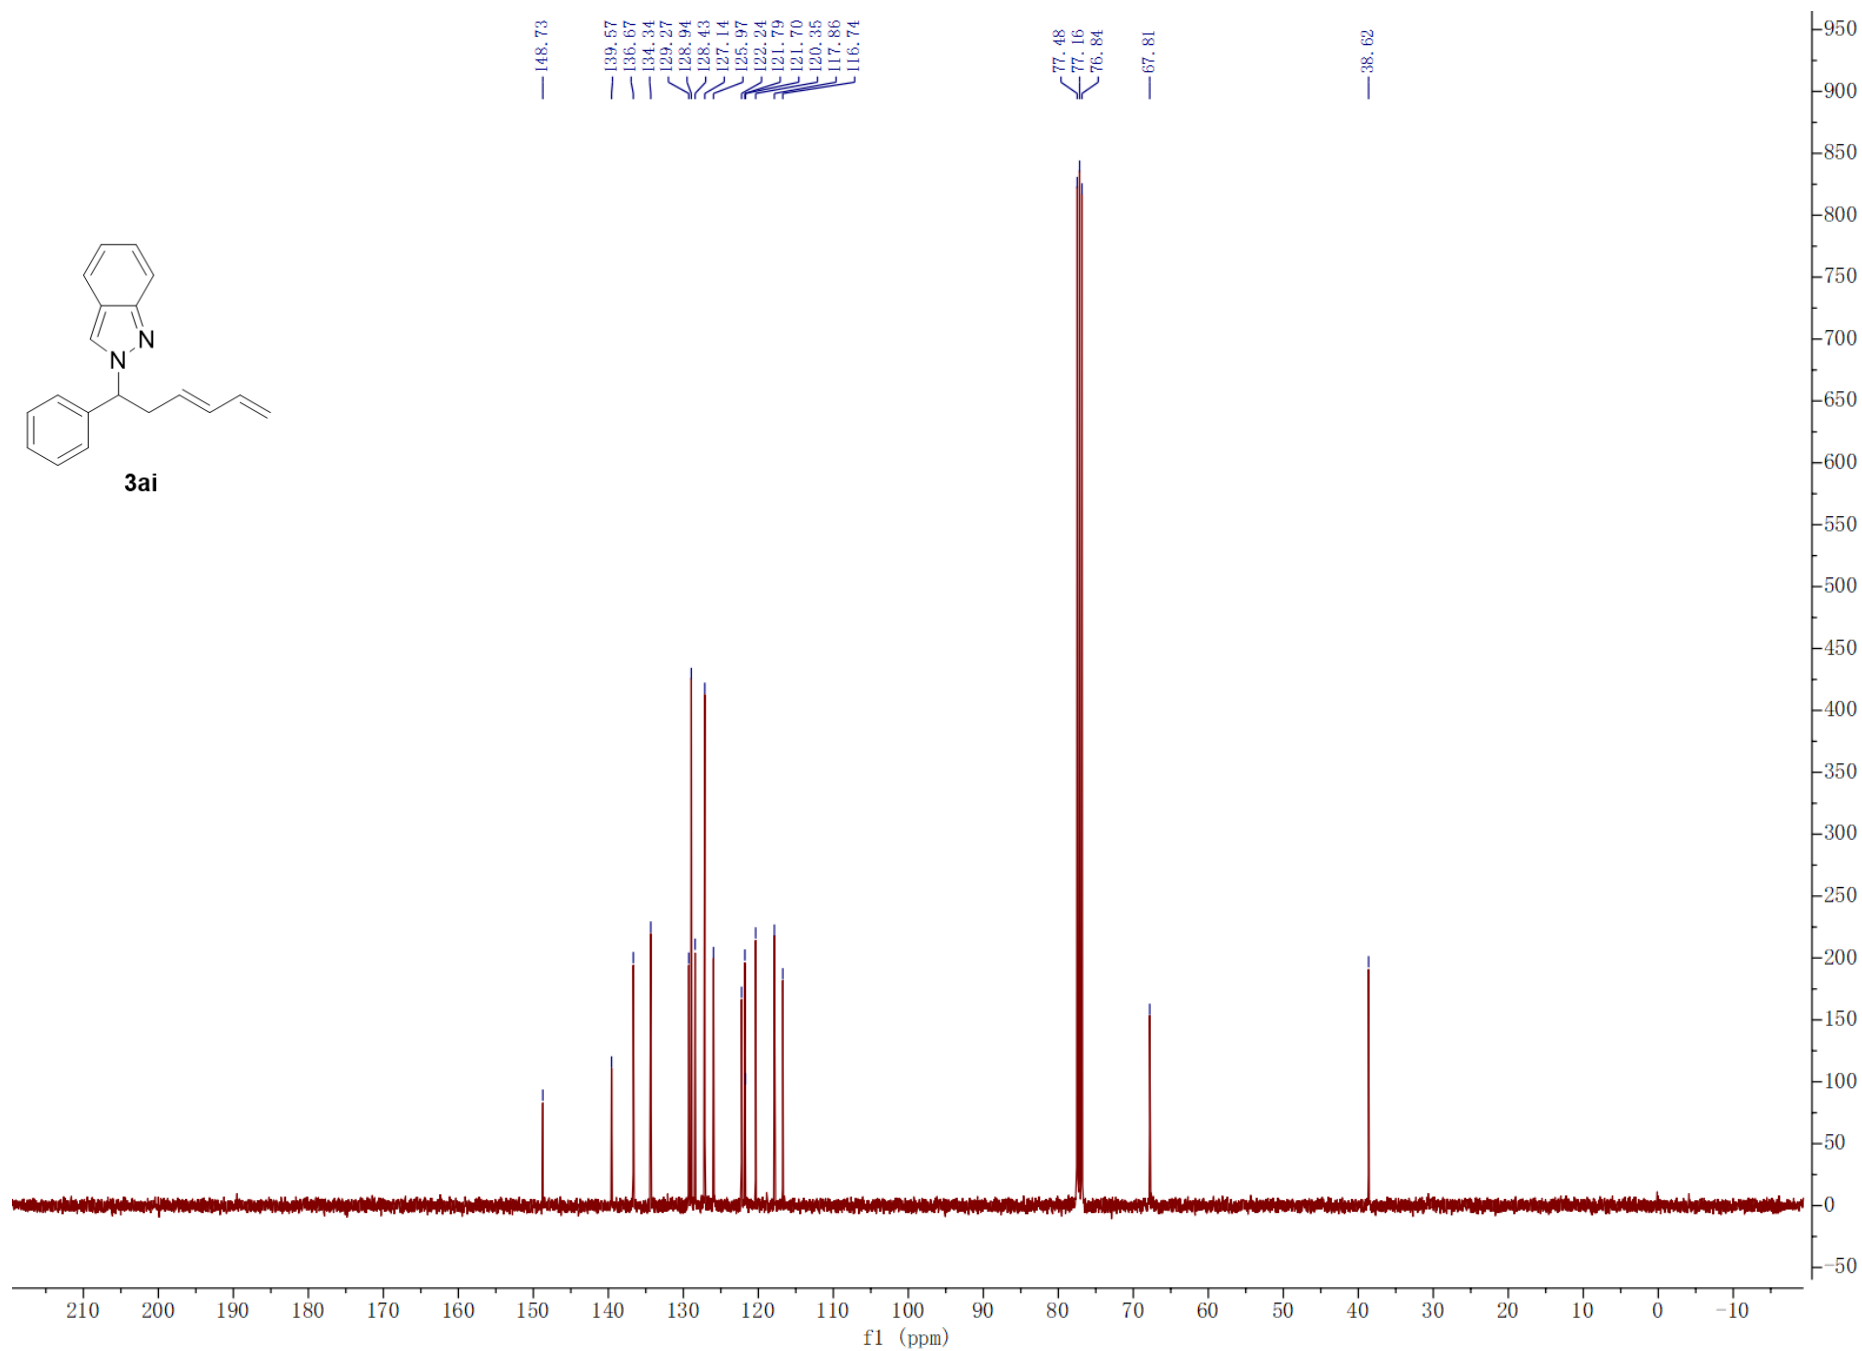

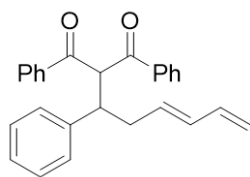

**3aj**

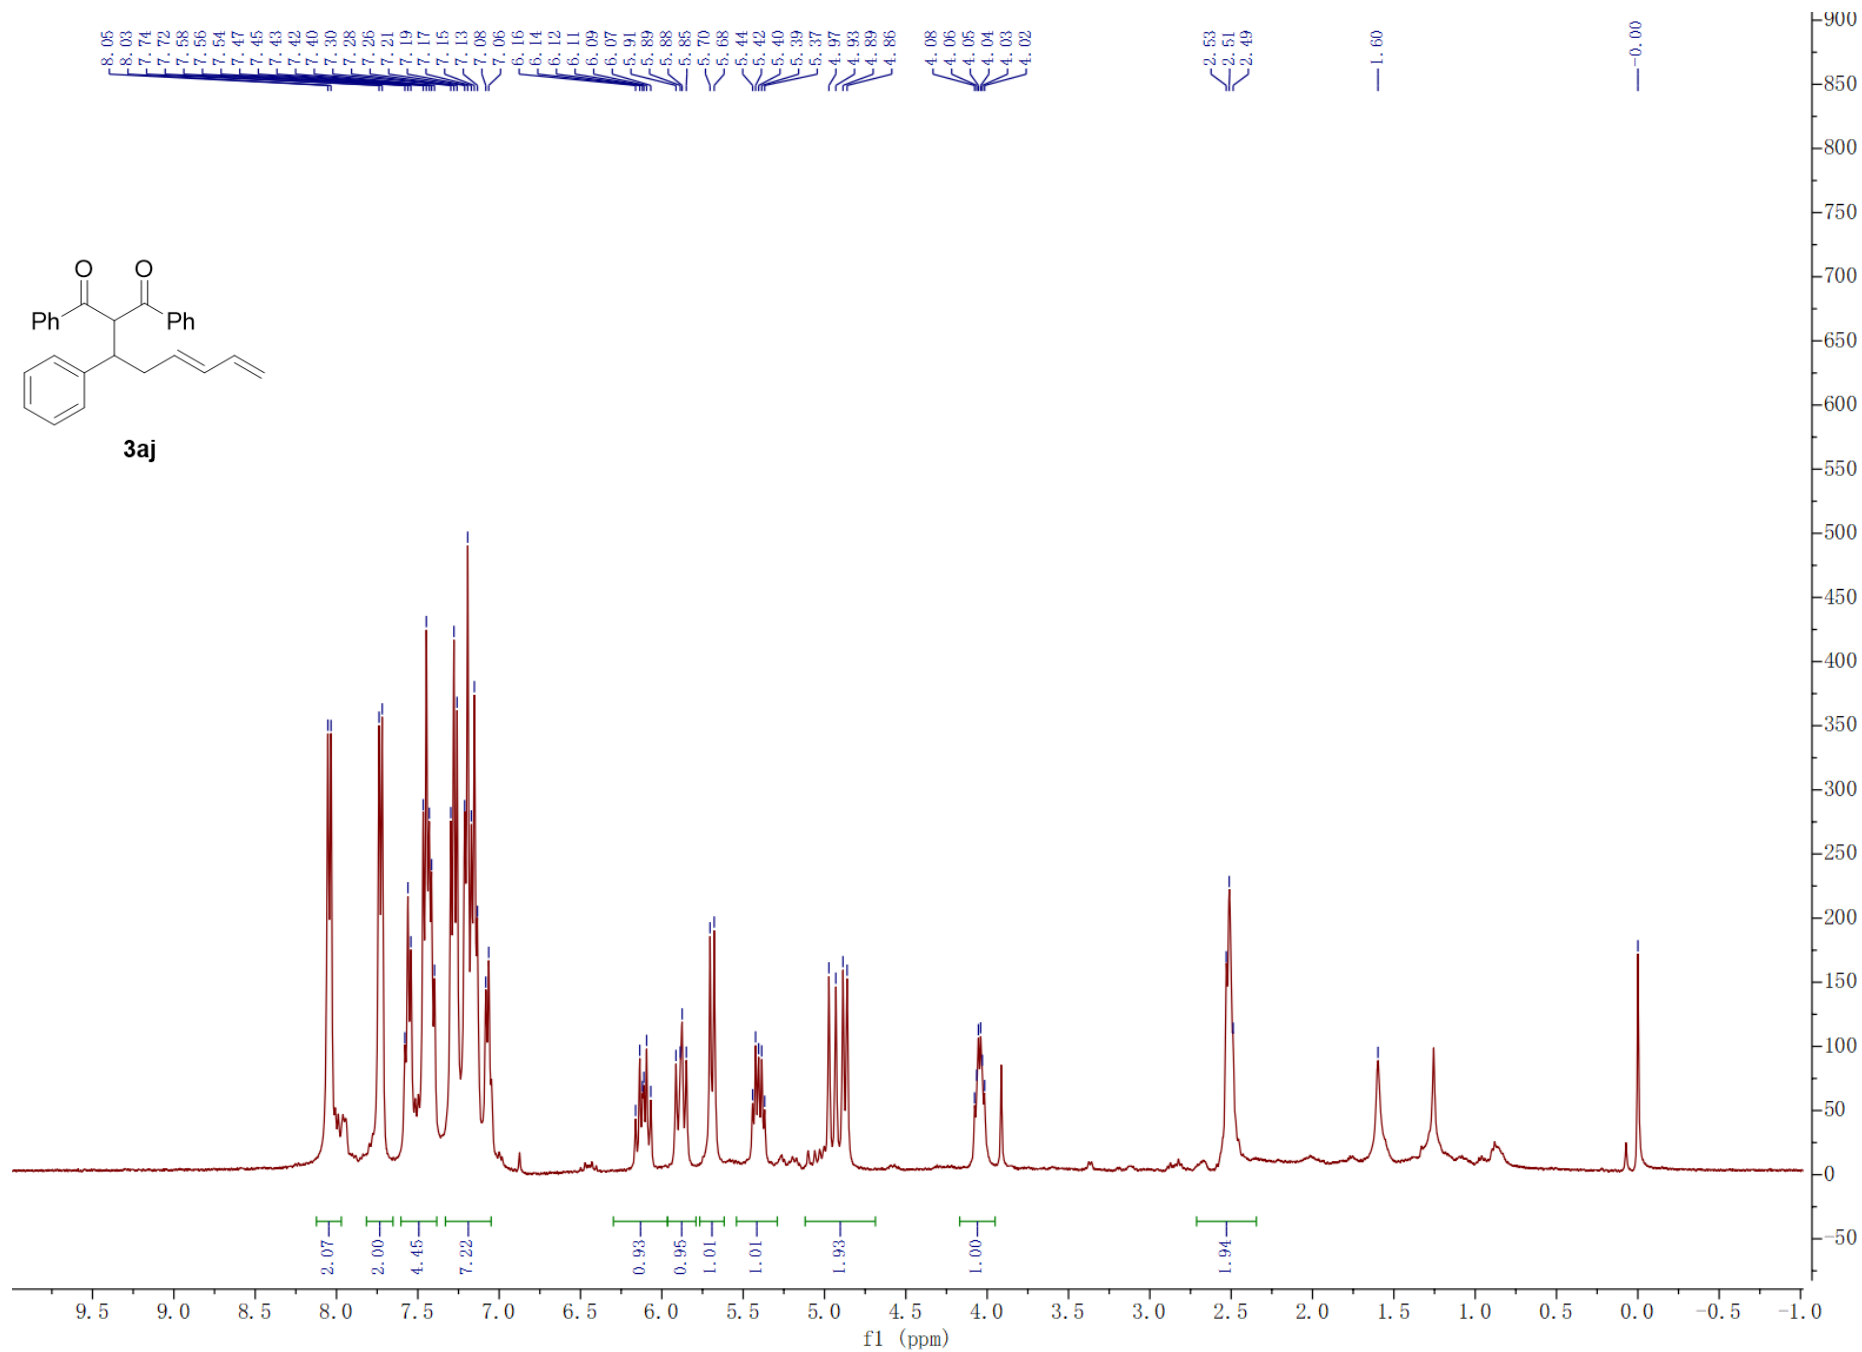

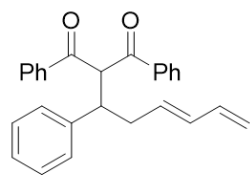

**3aj**

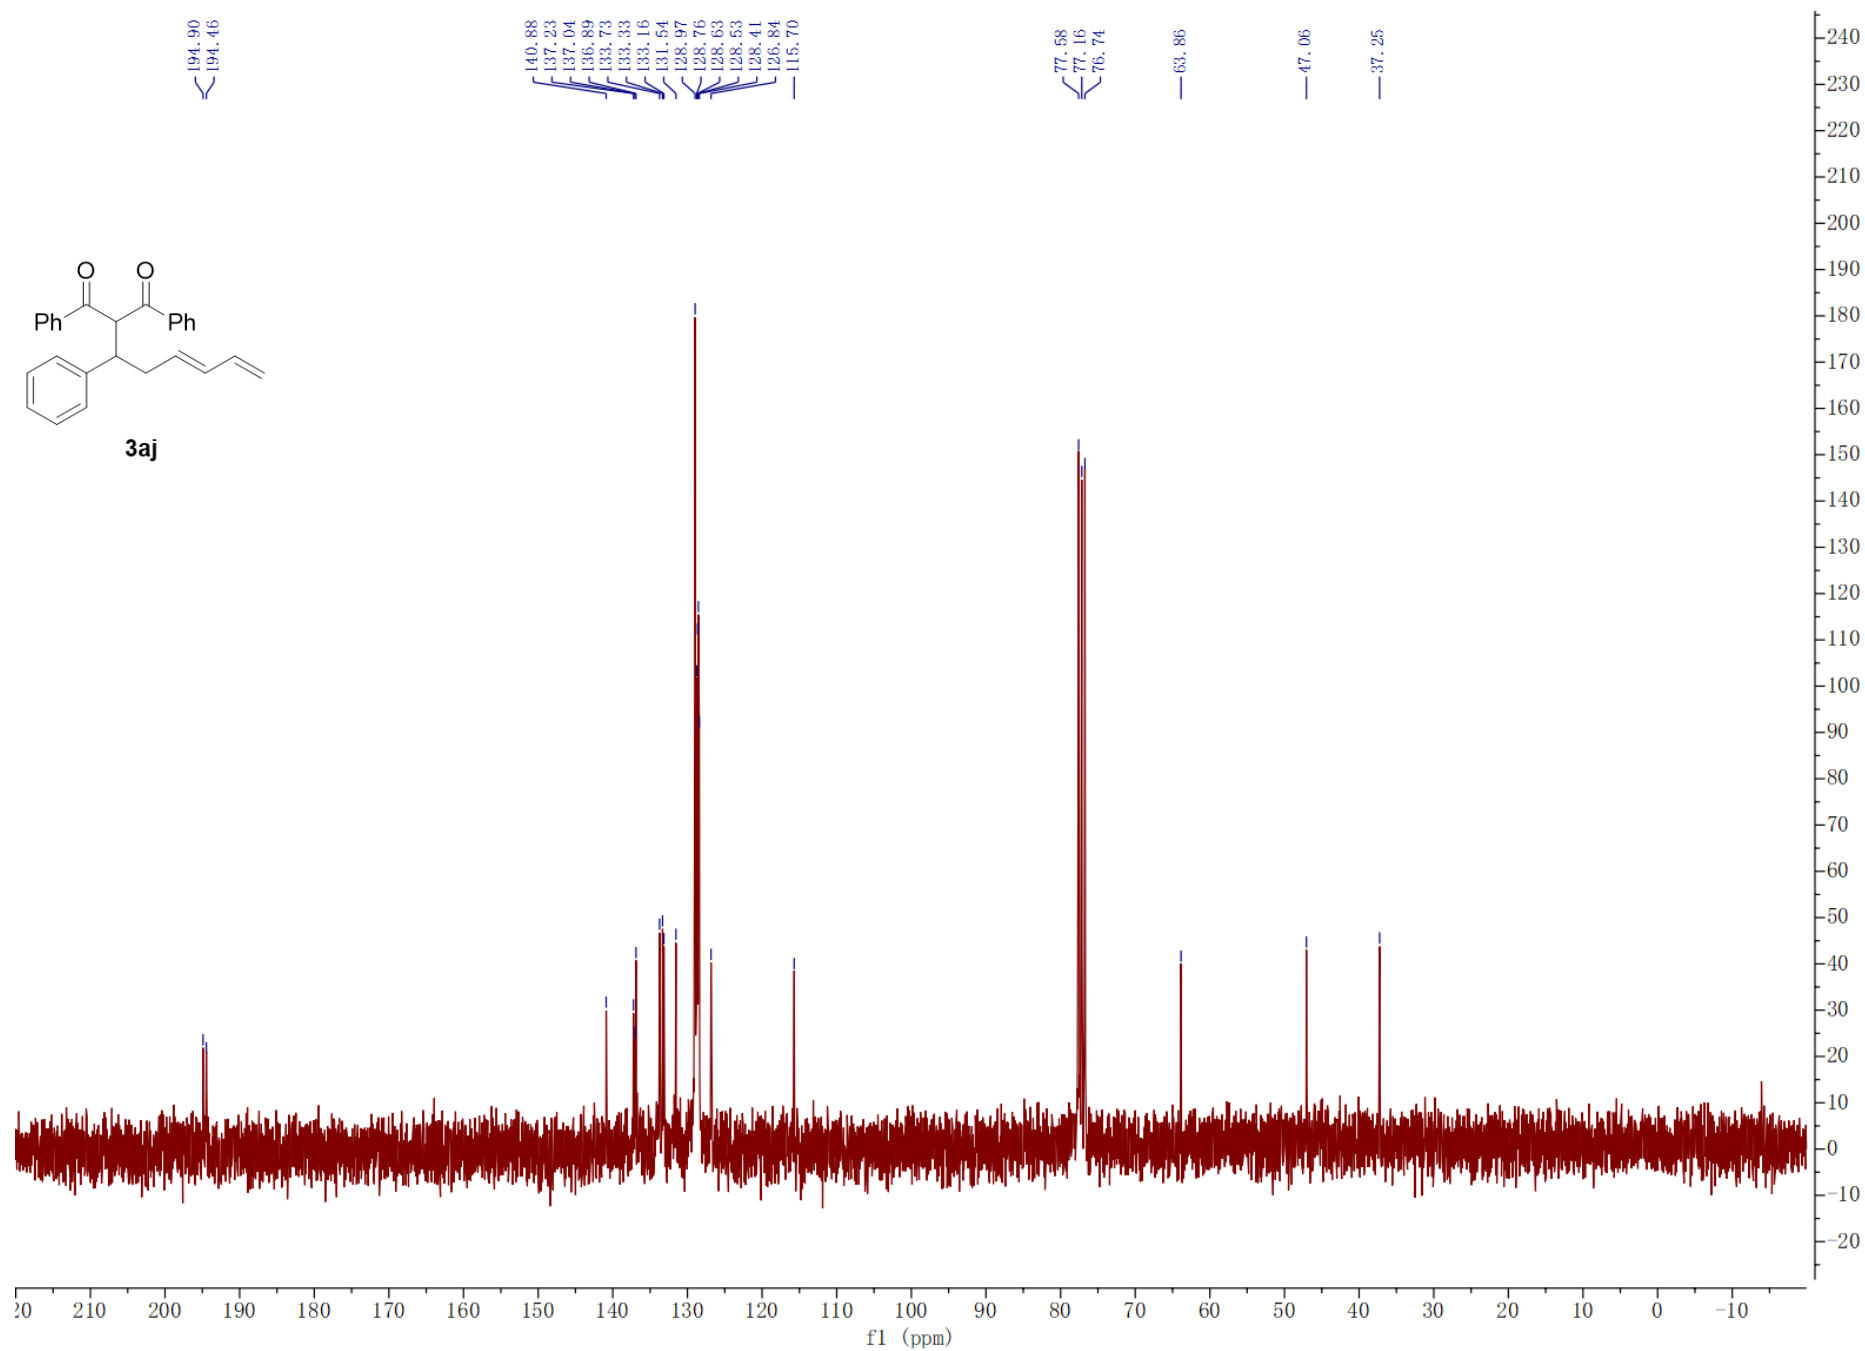

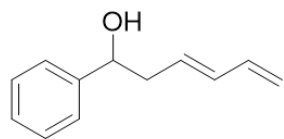

**5a**

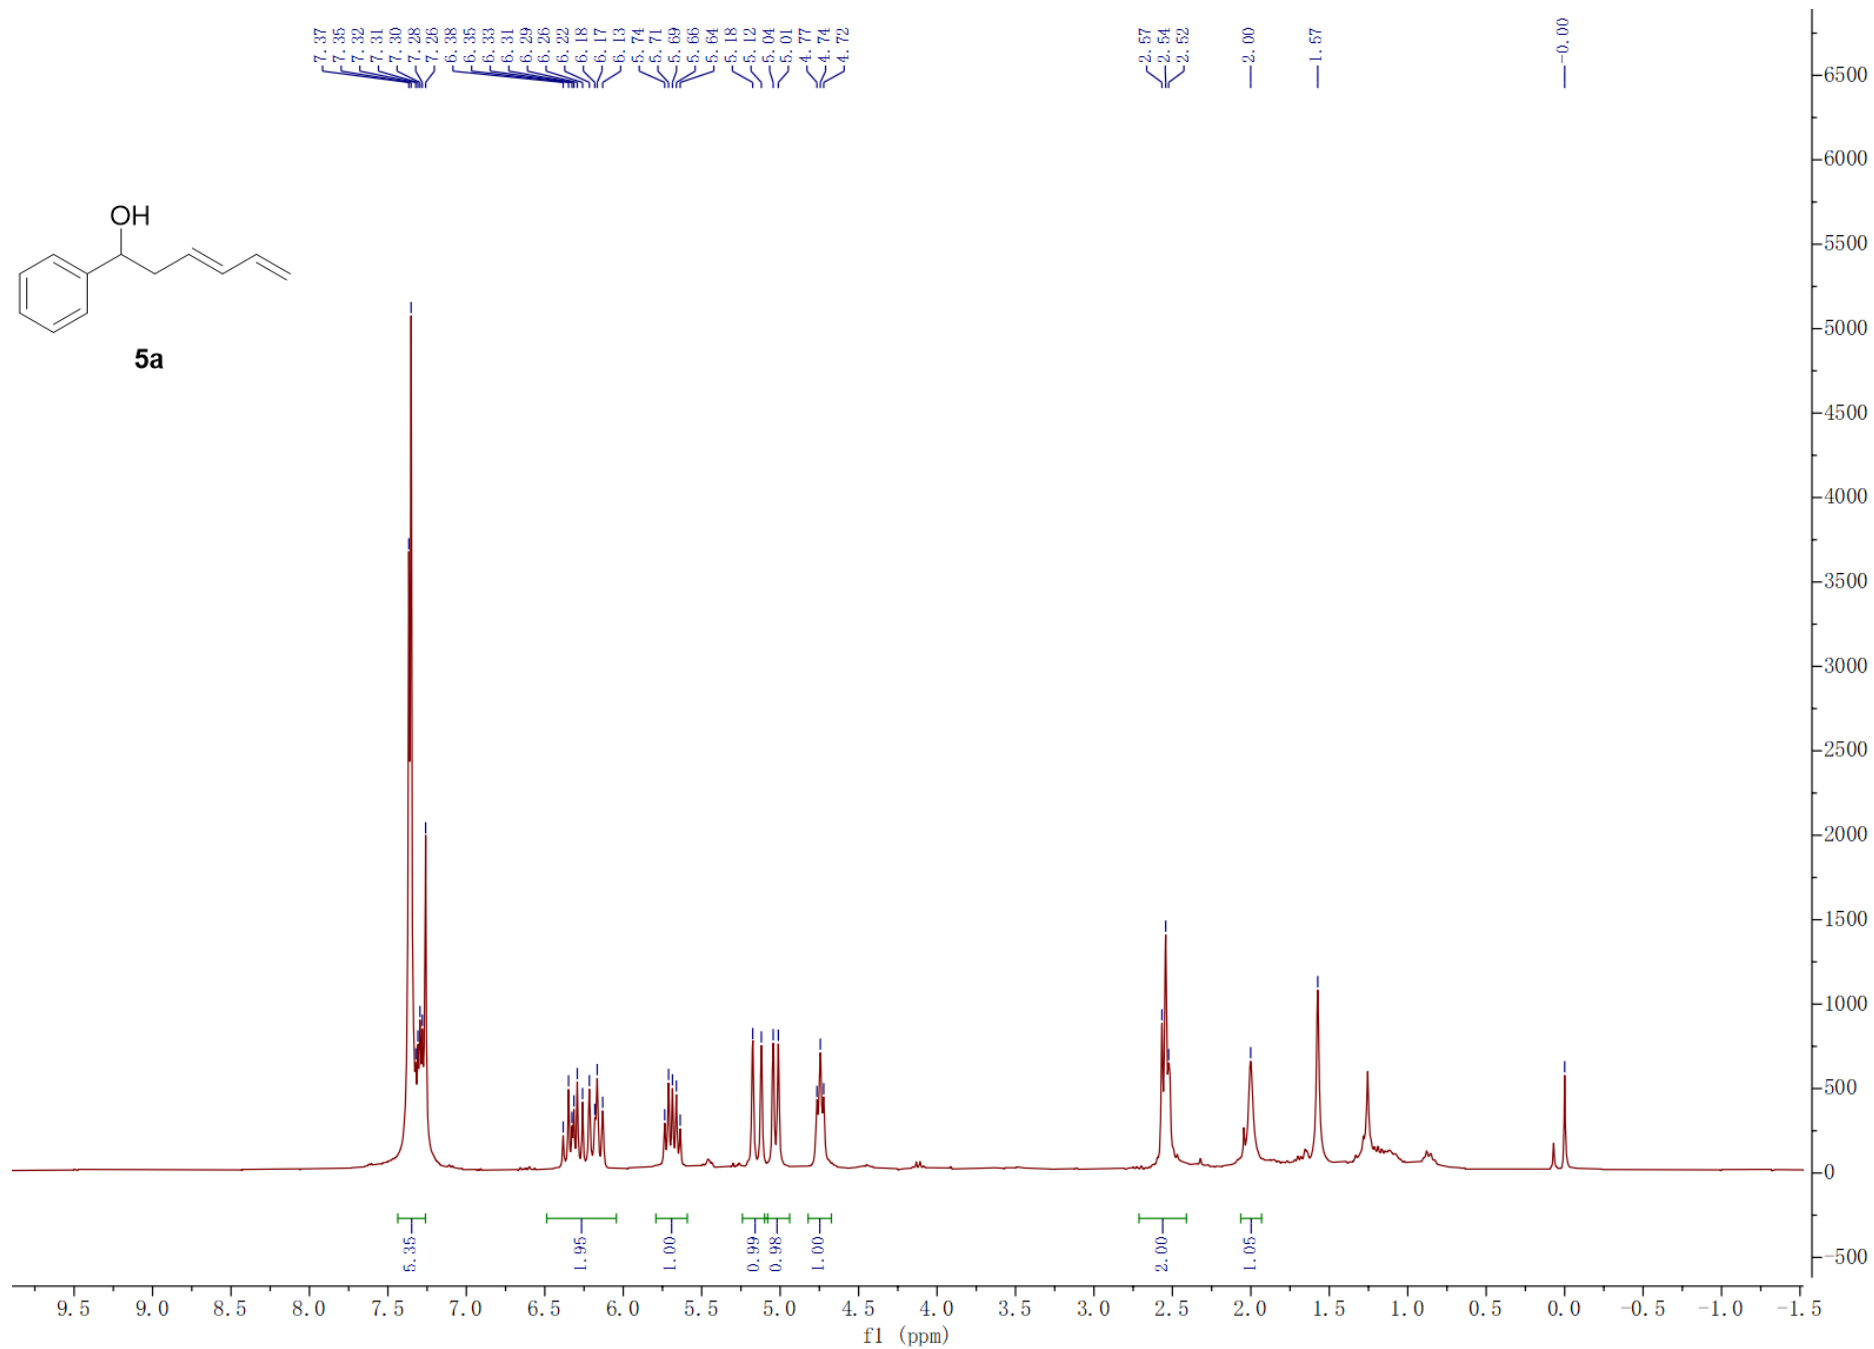

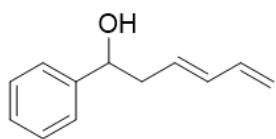

**5a**

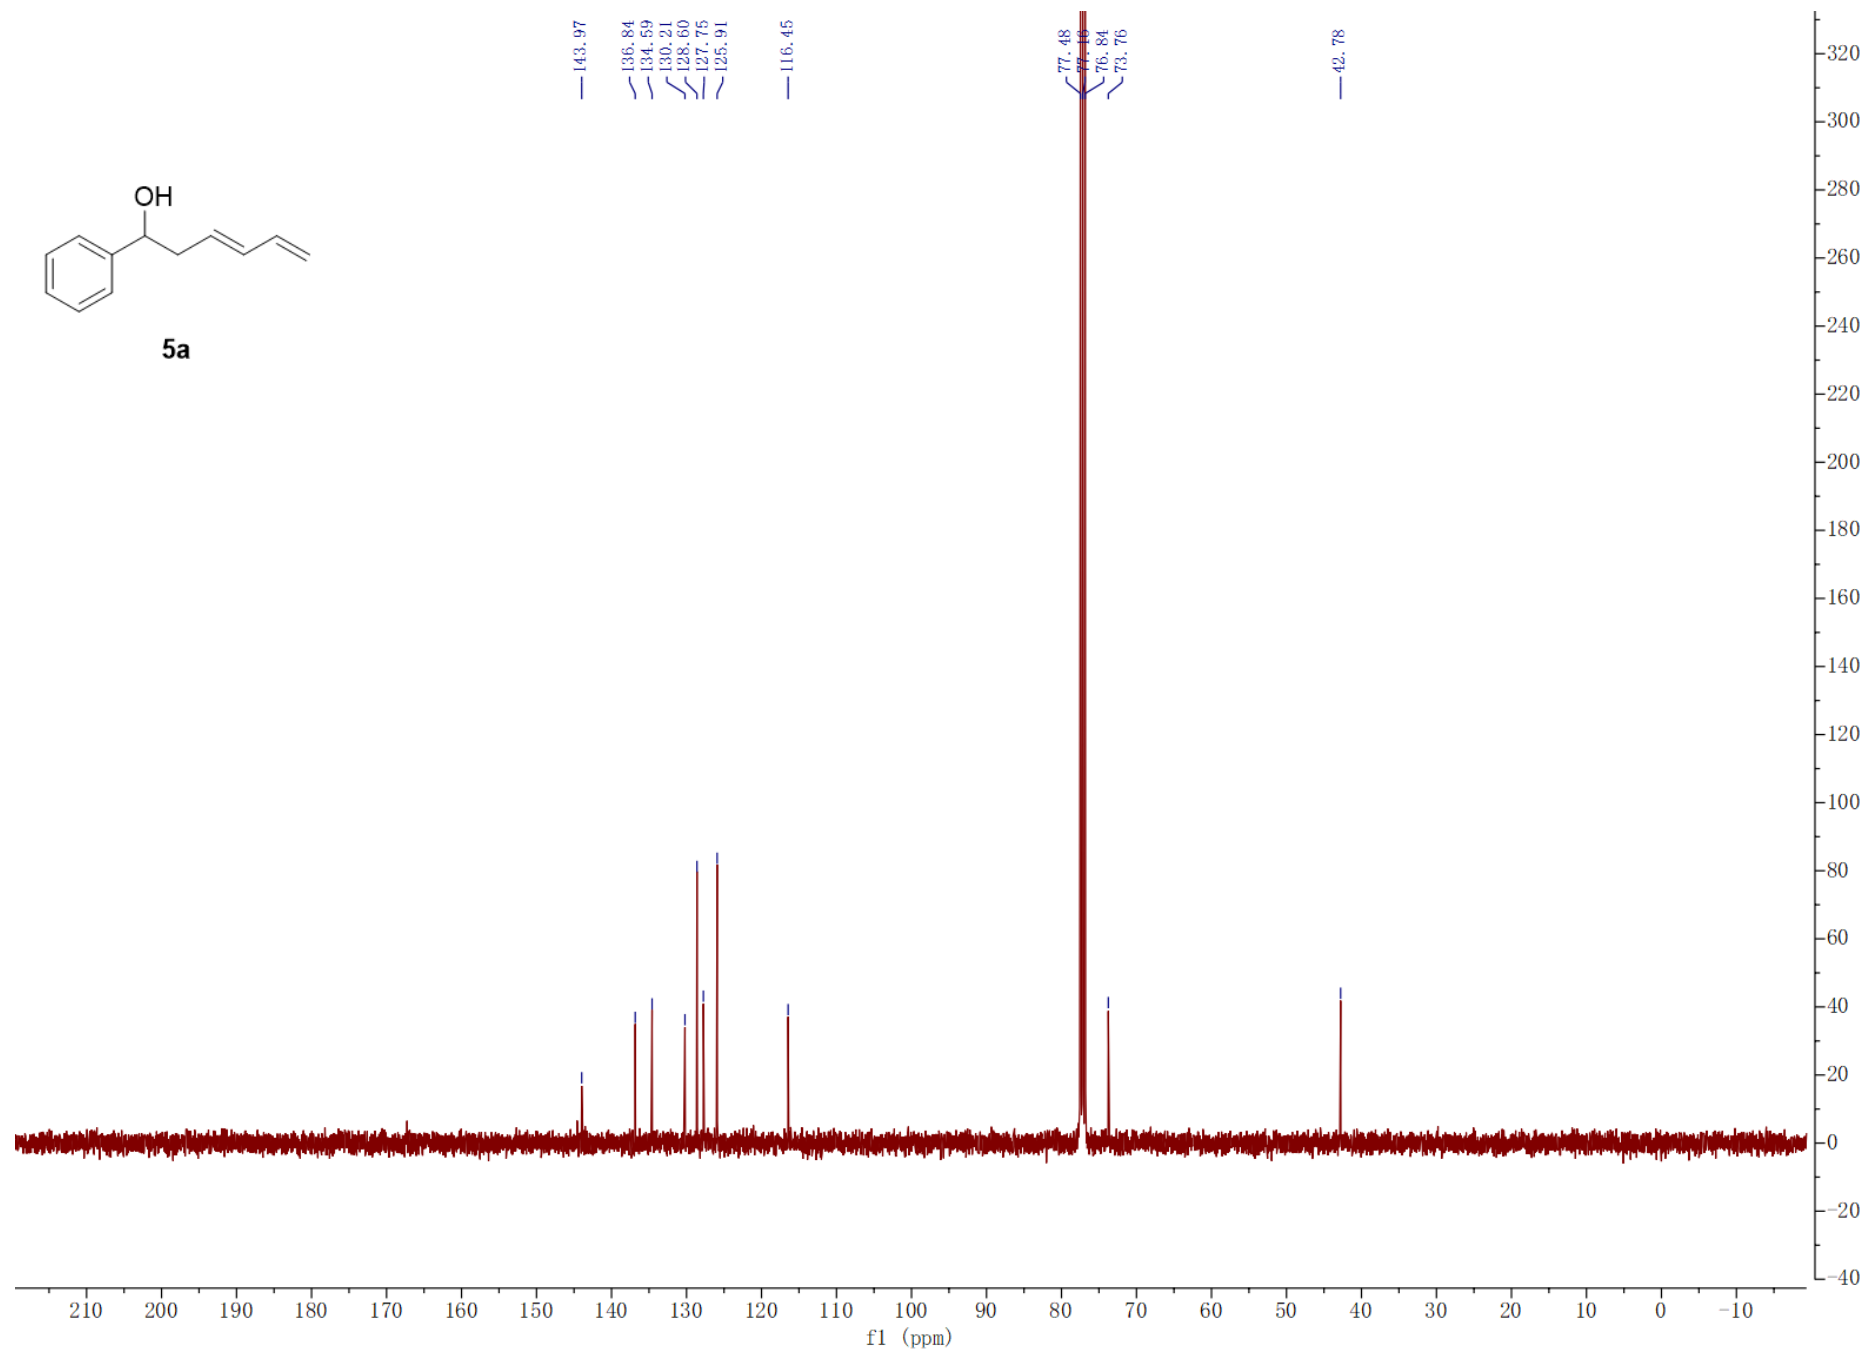

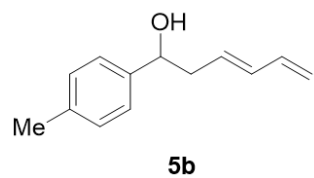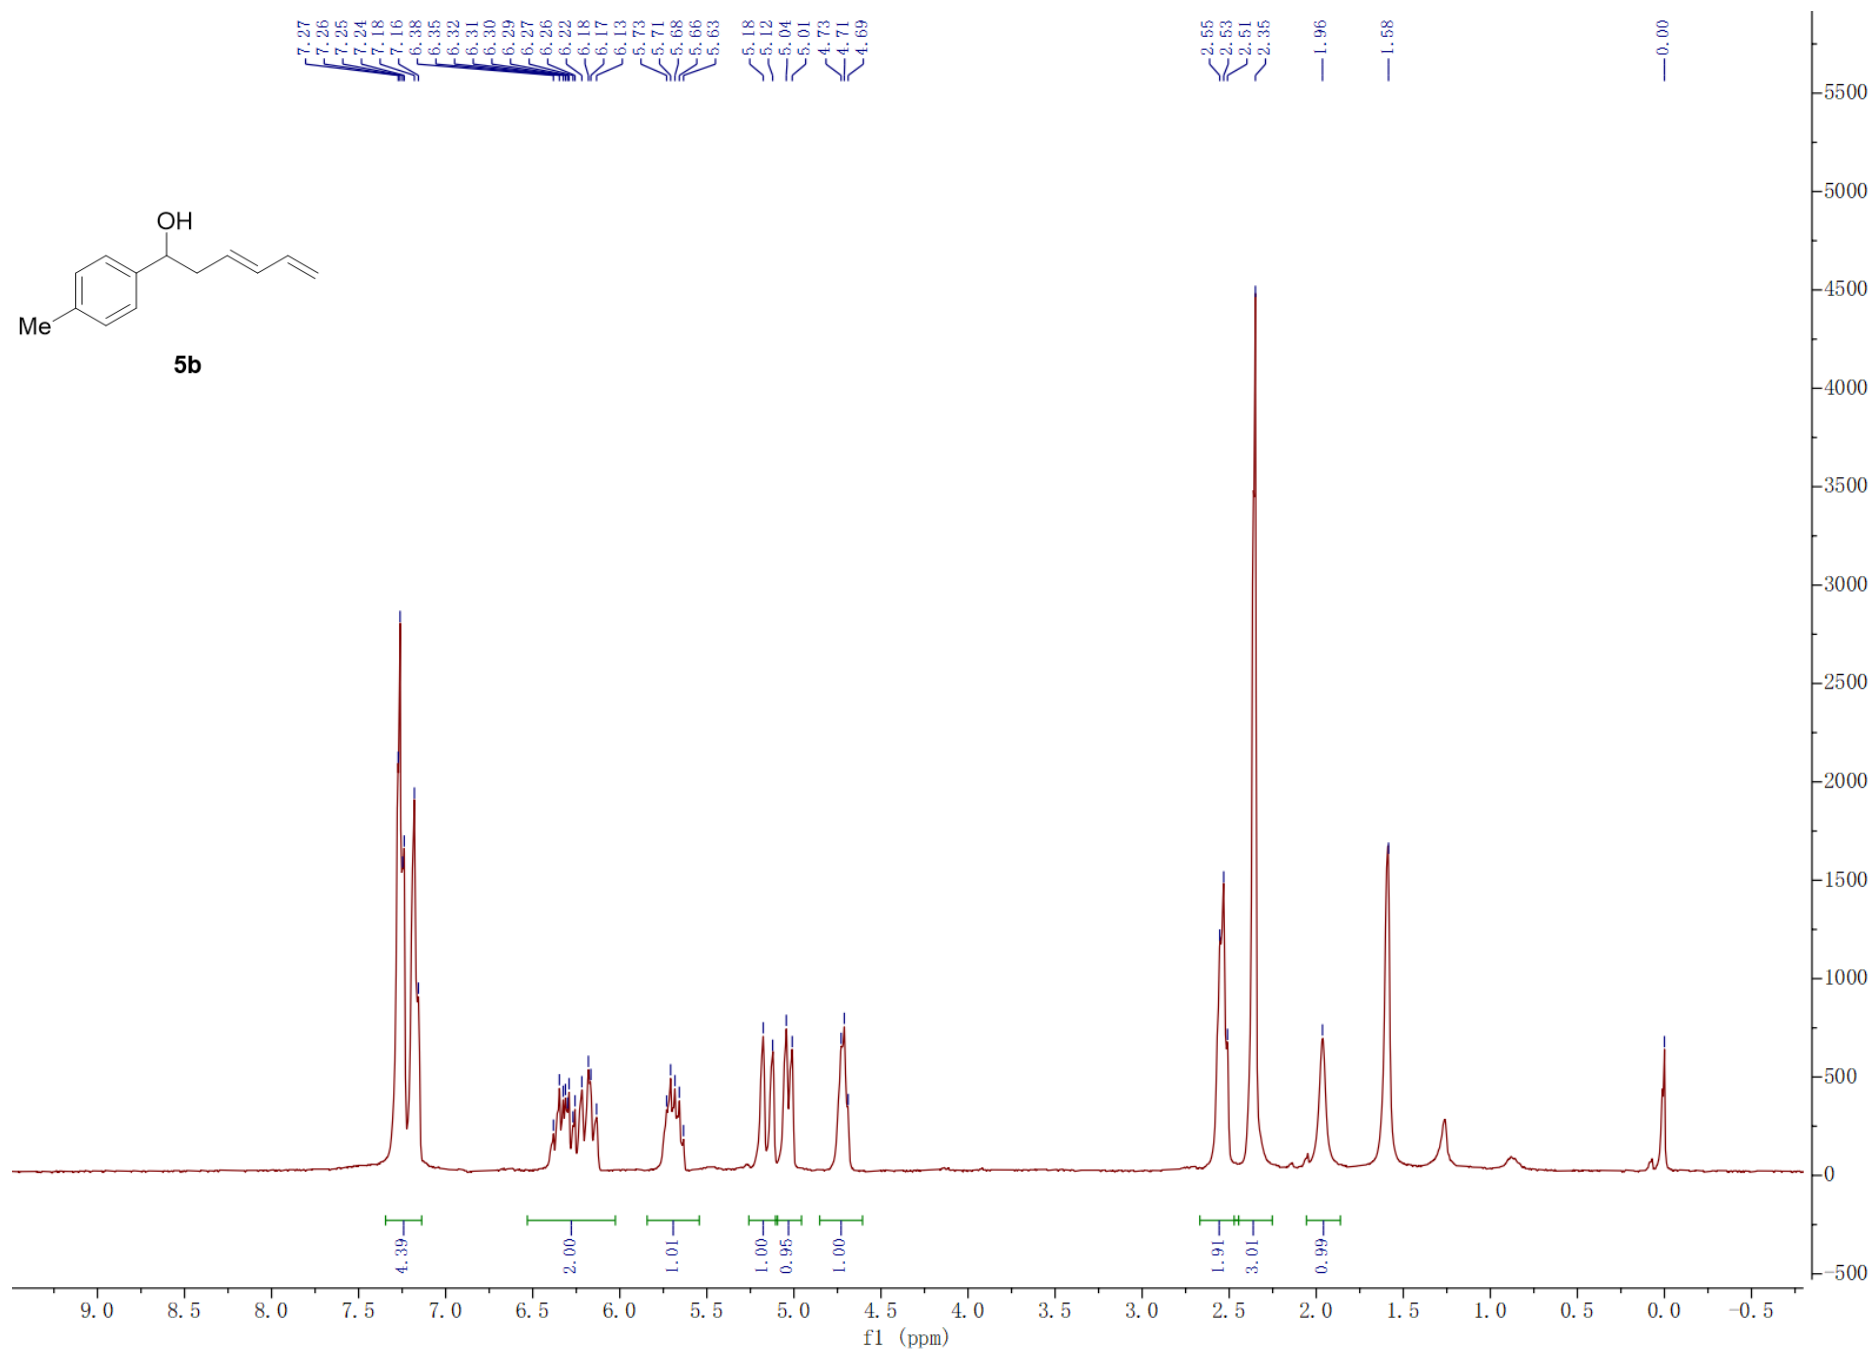



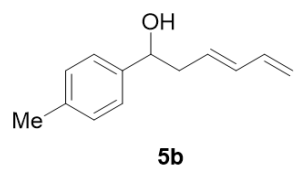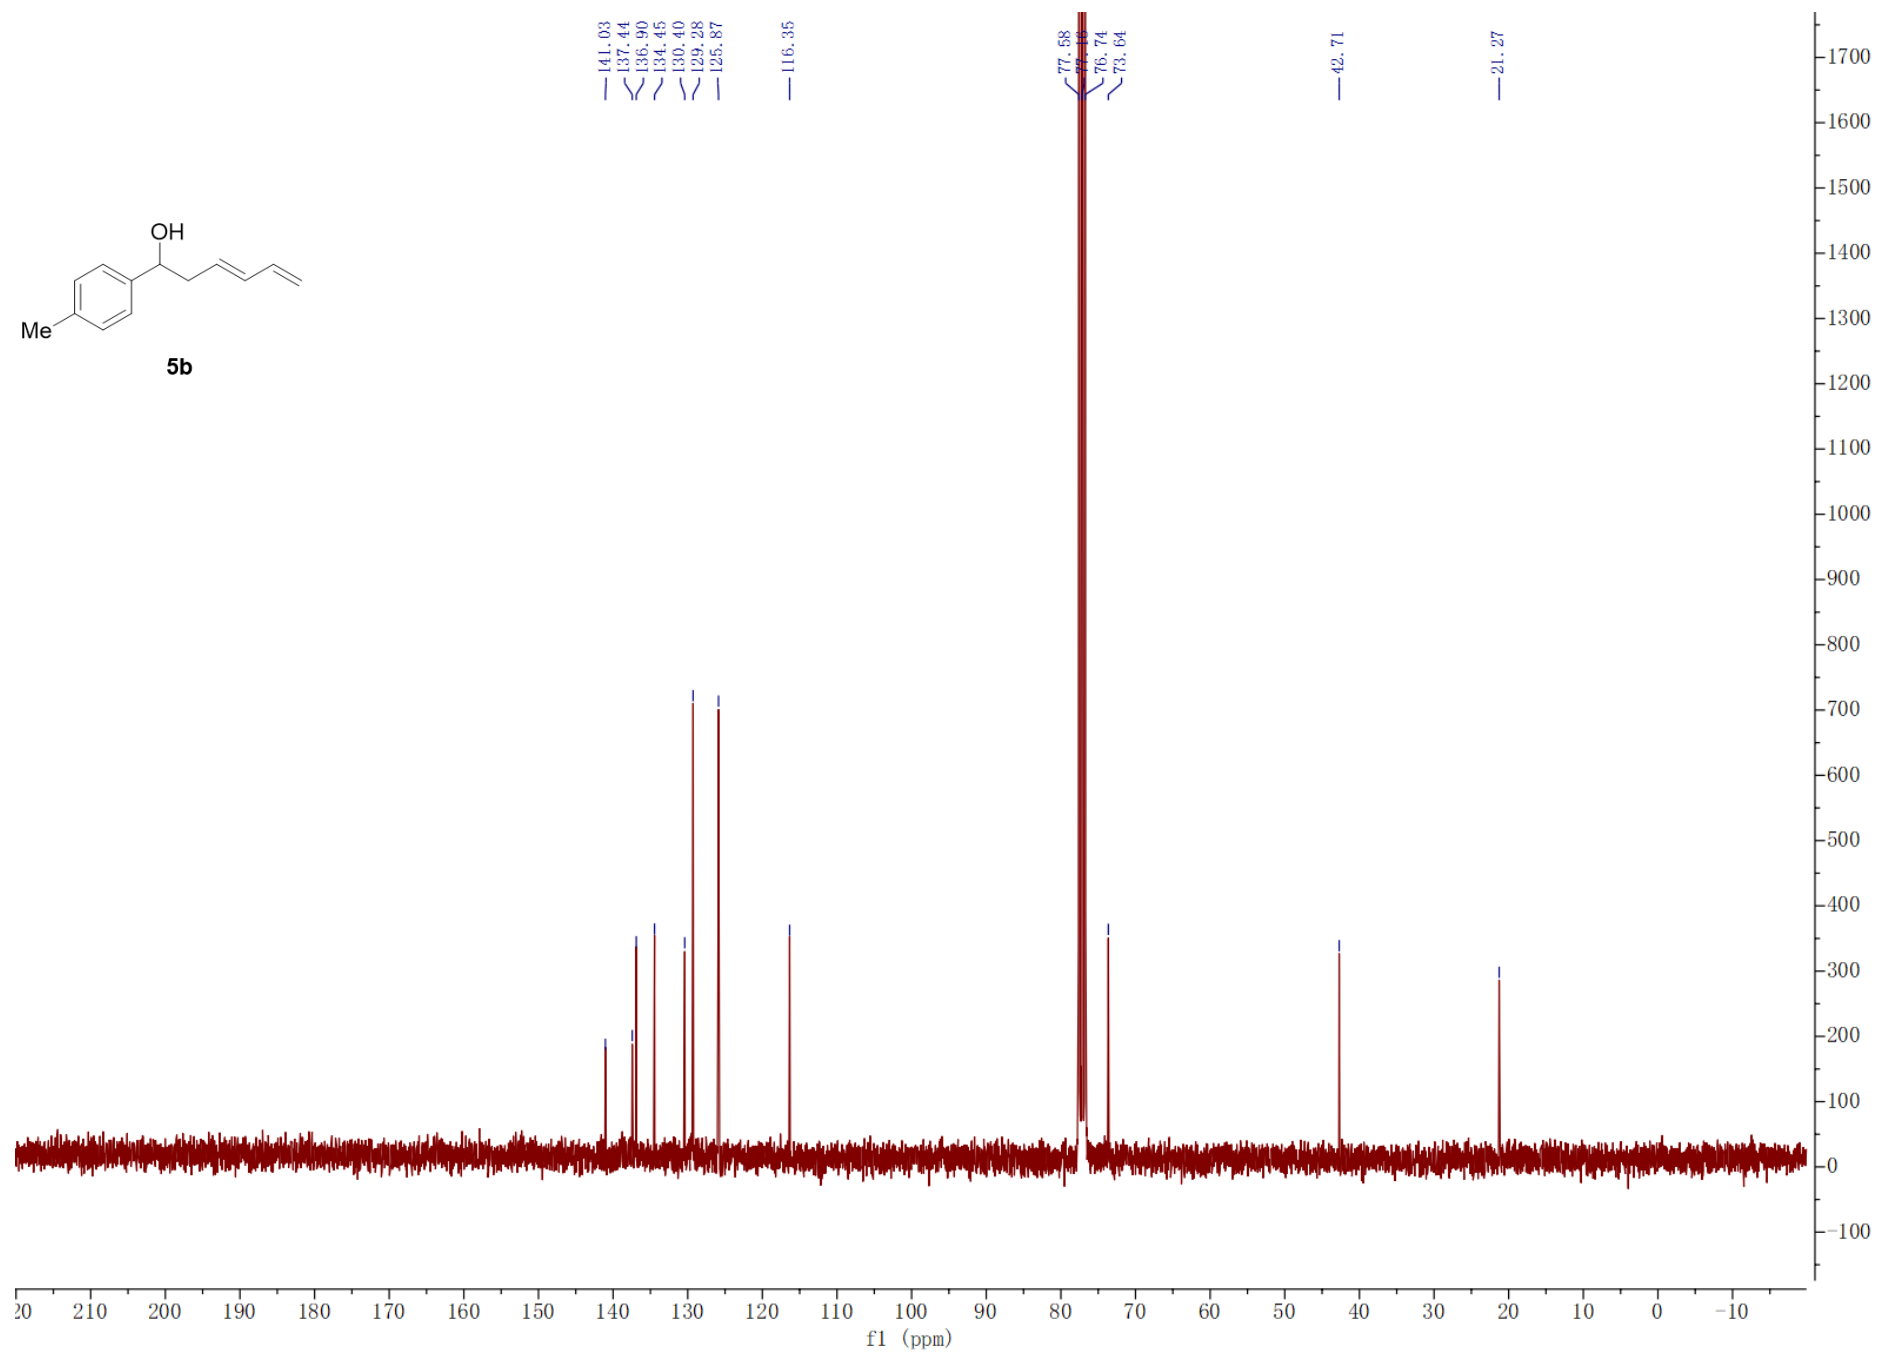

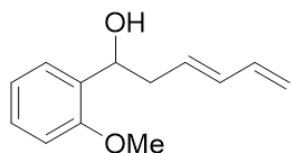

**5c**

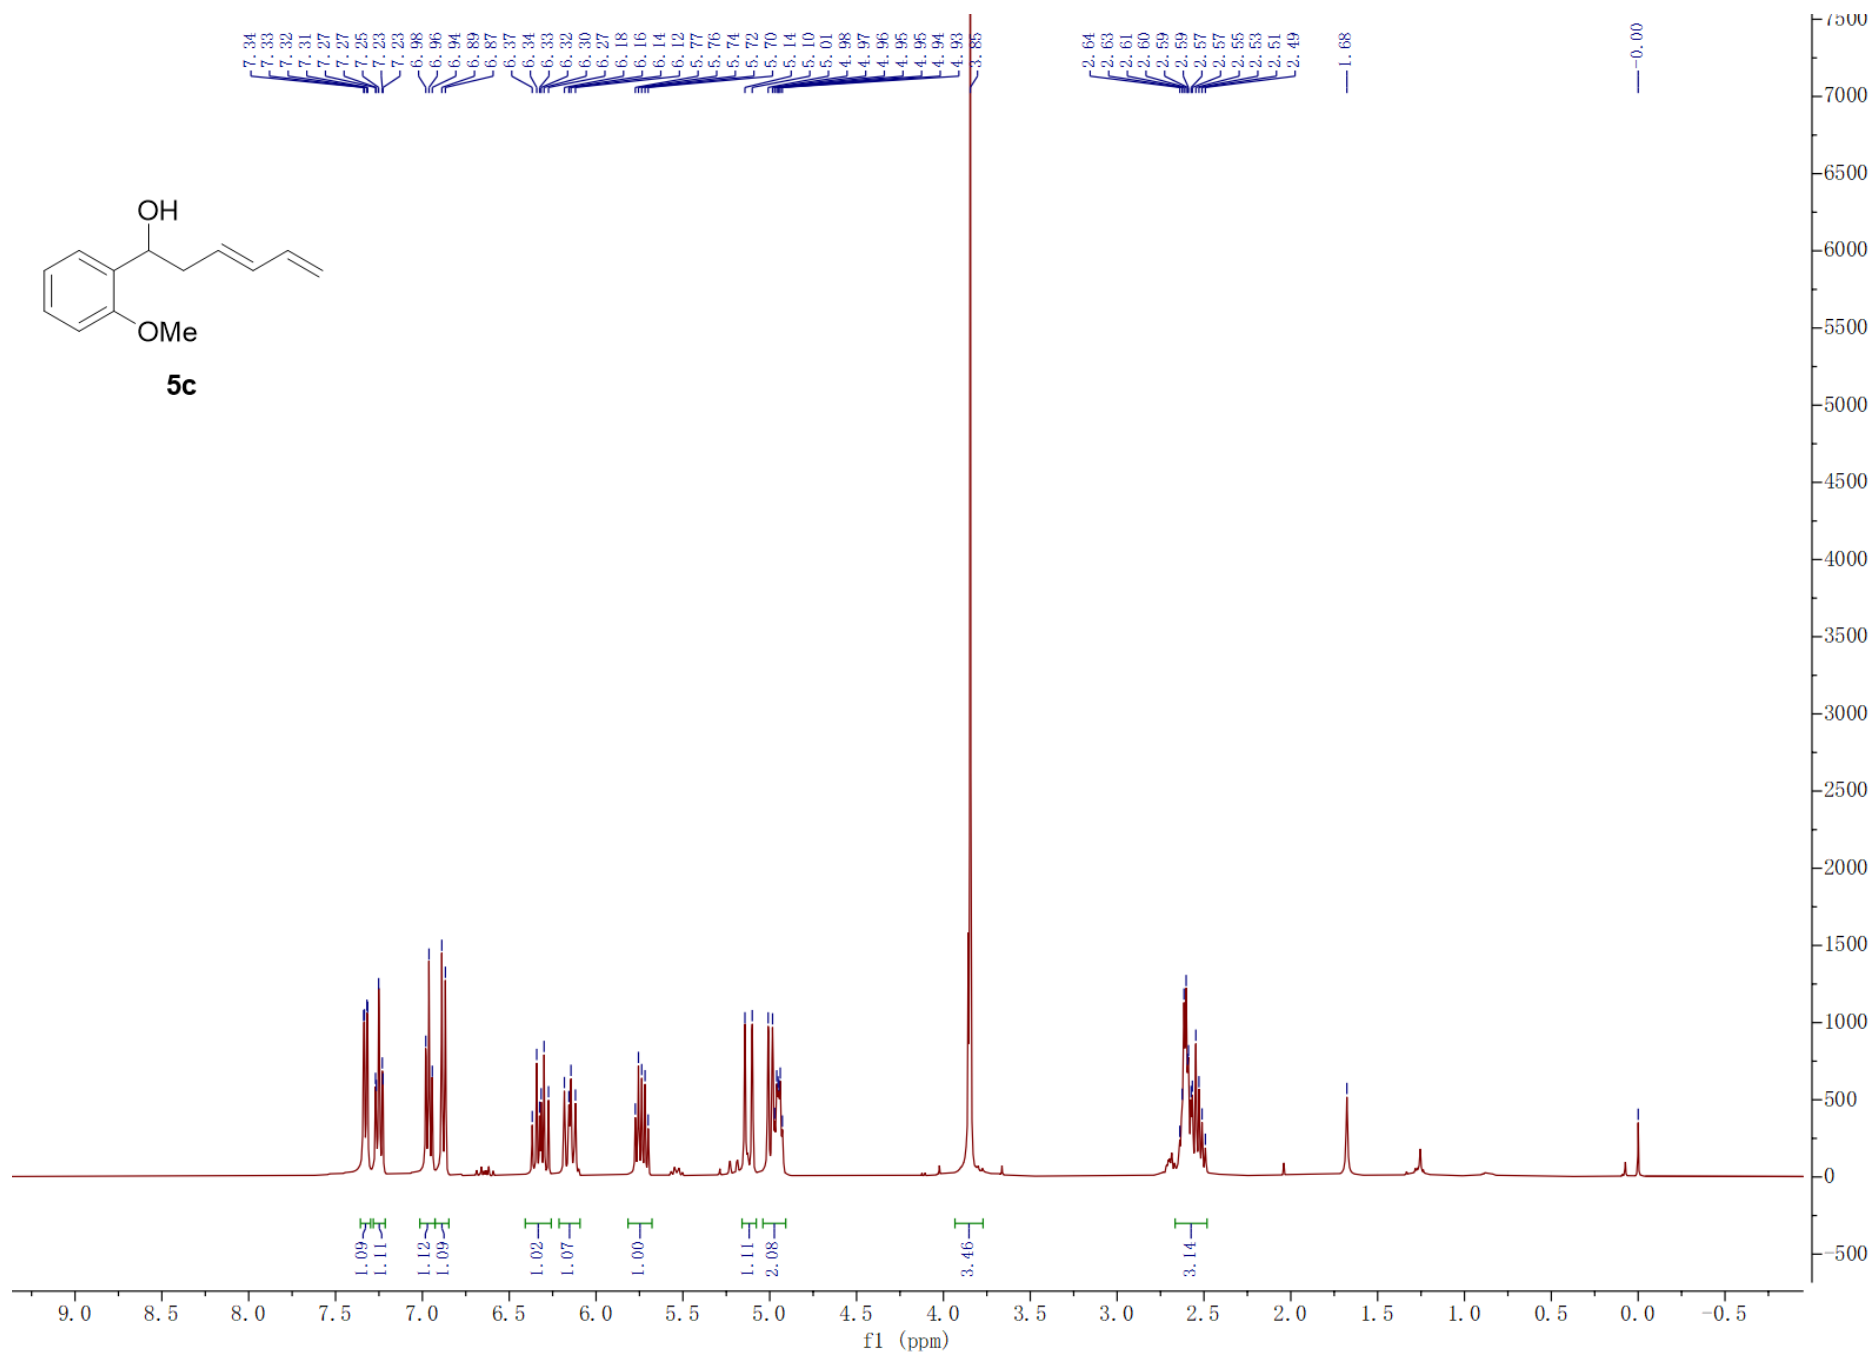

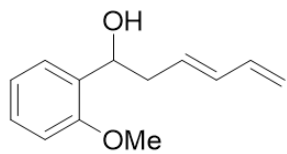

**5c**

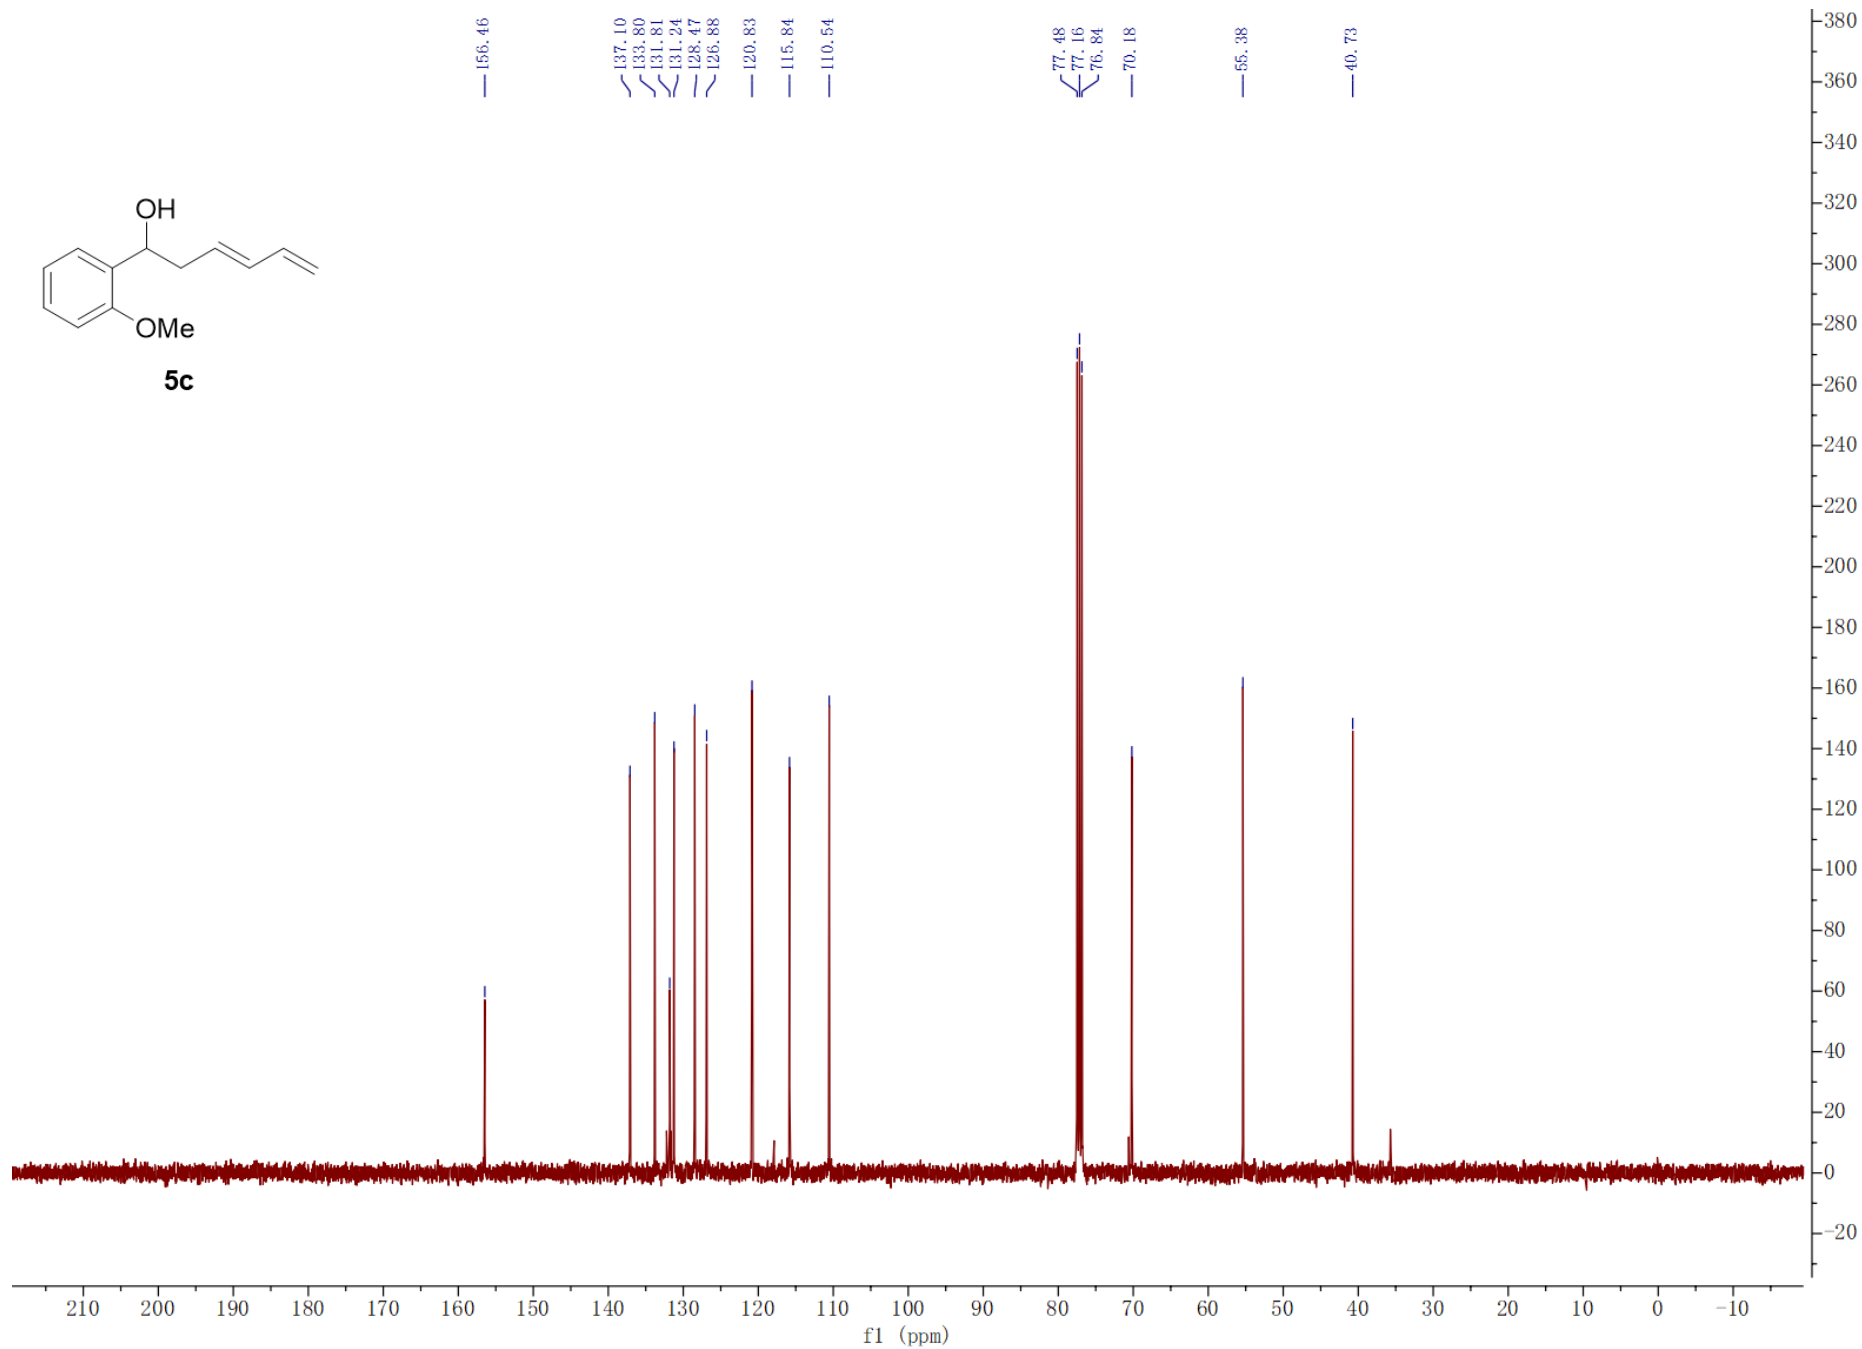

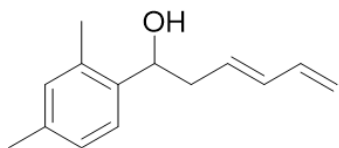

**5d**

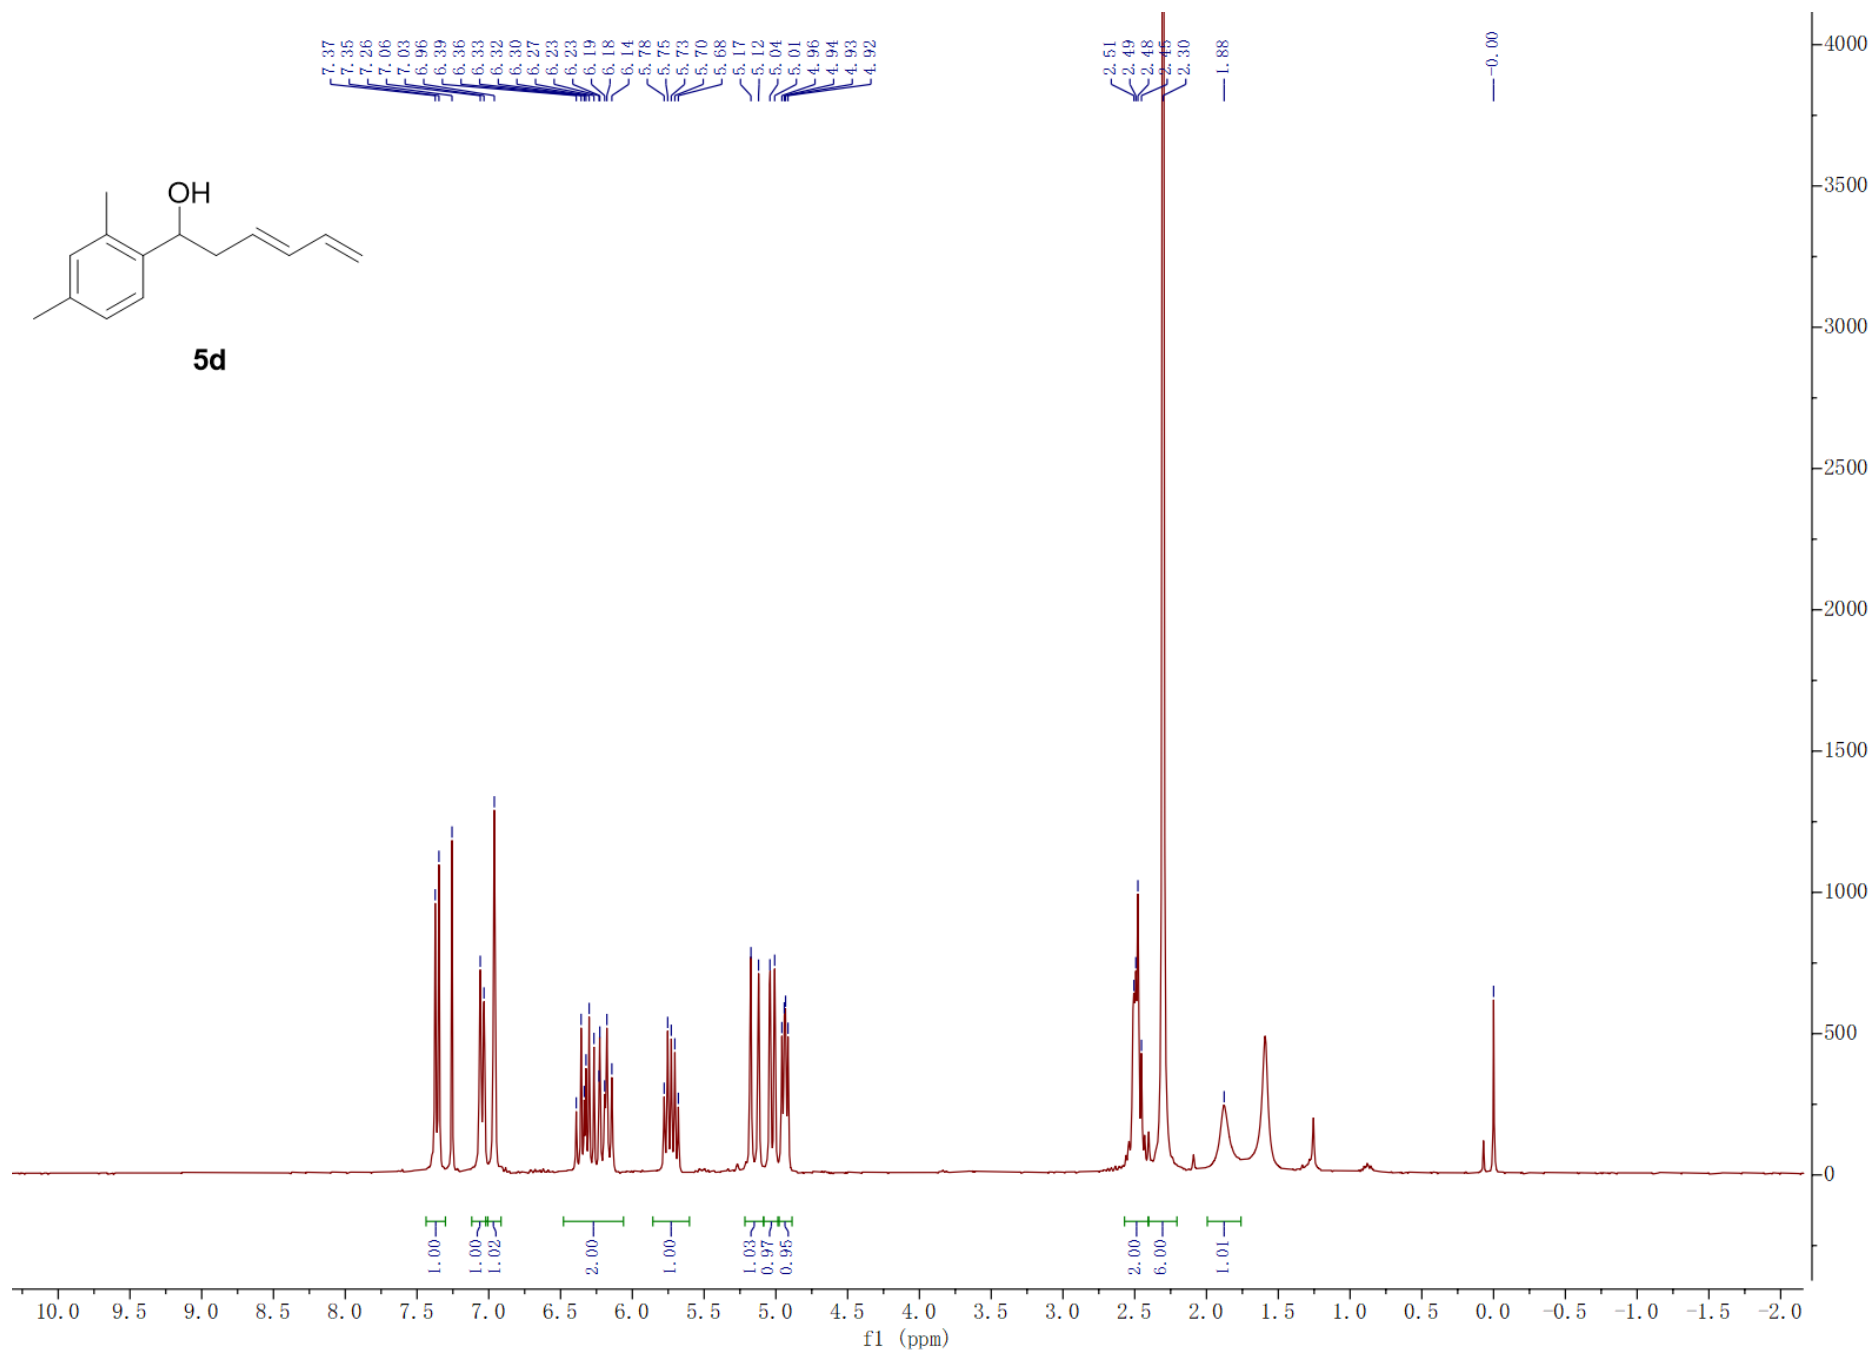

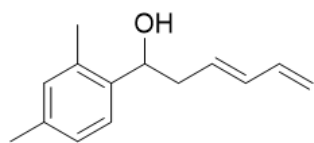

**5d**

139.14  
137.03  
136.93  
134.43  
134.30  
131.31  
130.72  
127.10  
125.27  
116.28

77.58  
77.16  
76.74  
70.10

41.59

21.11  
19.12

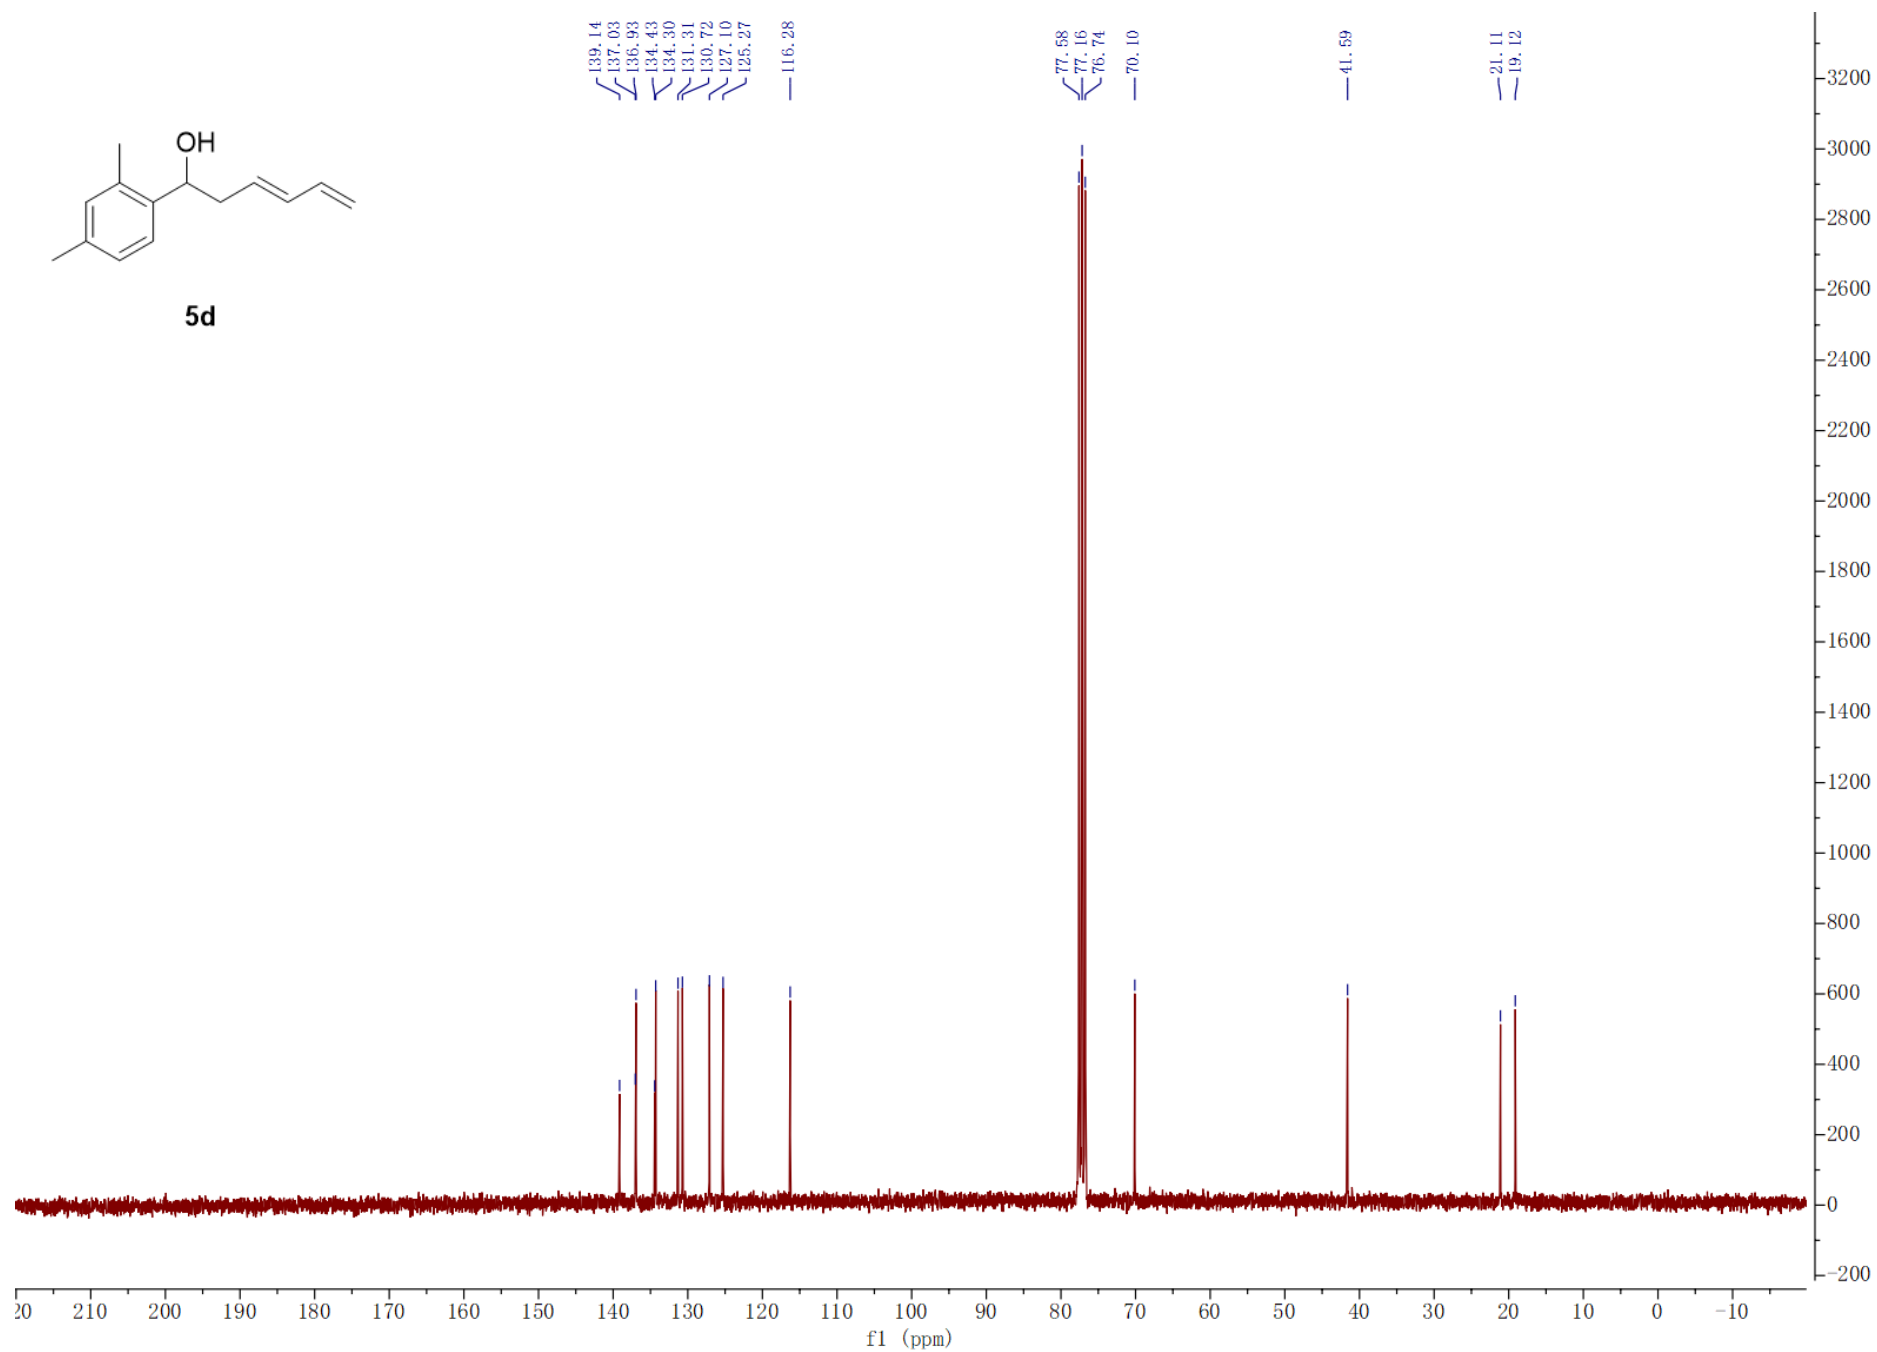

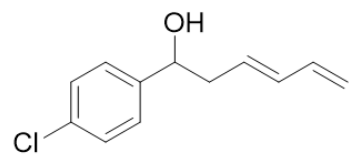

**5e**

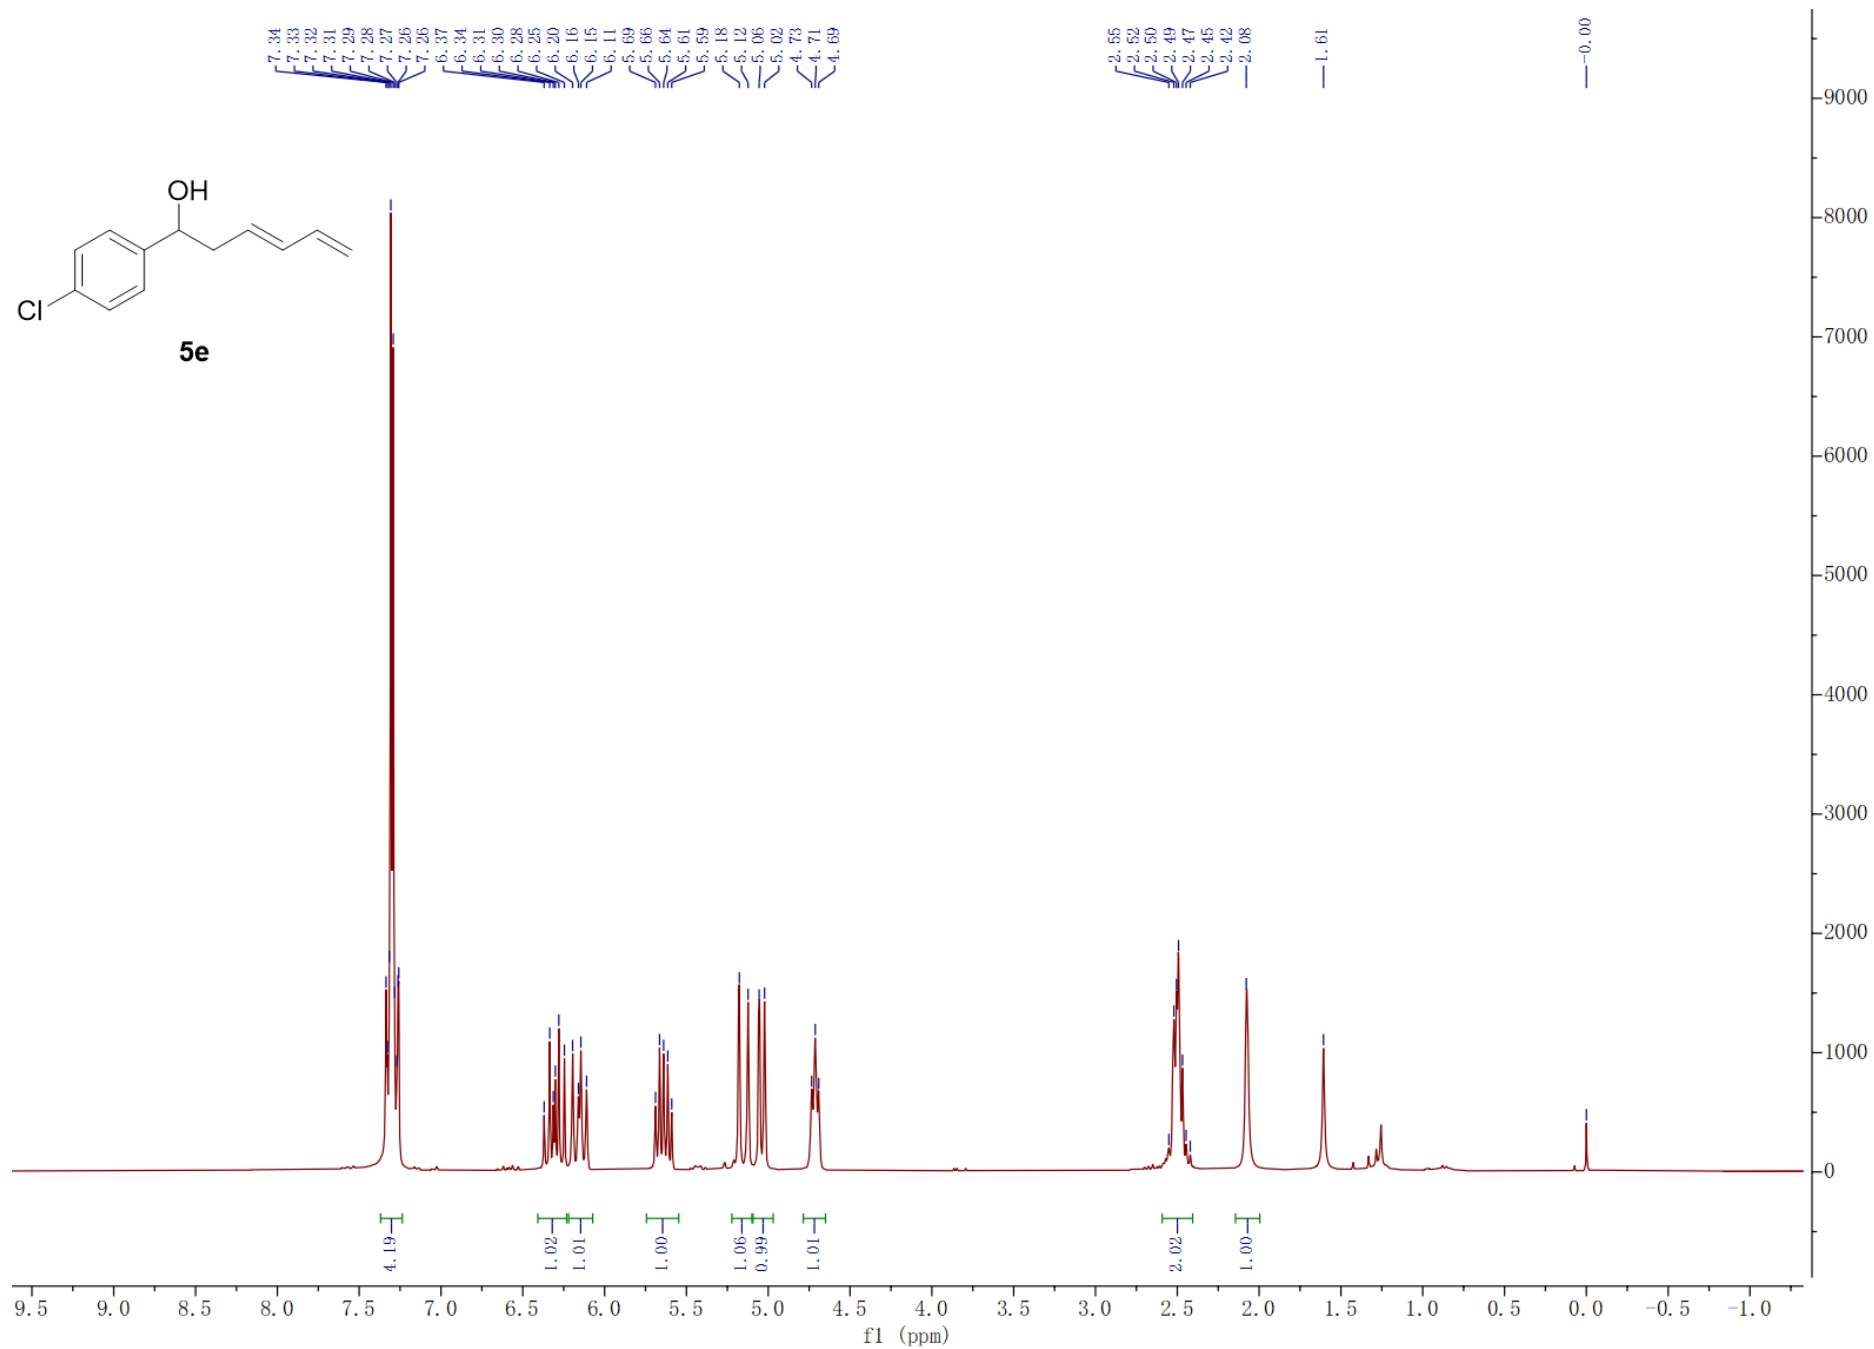

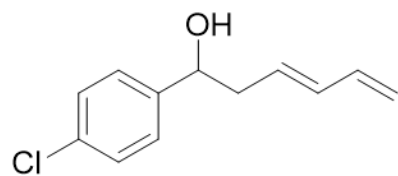

**5e**

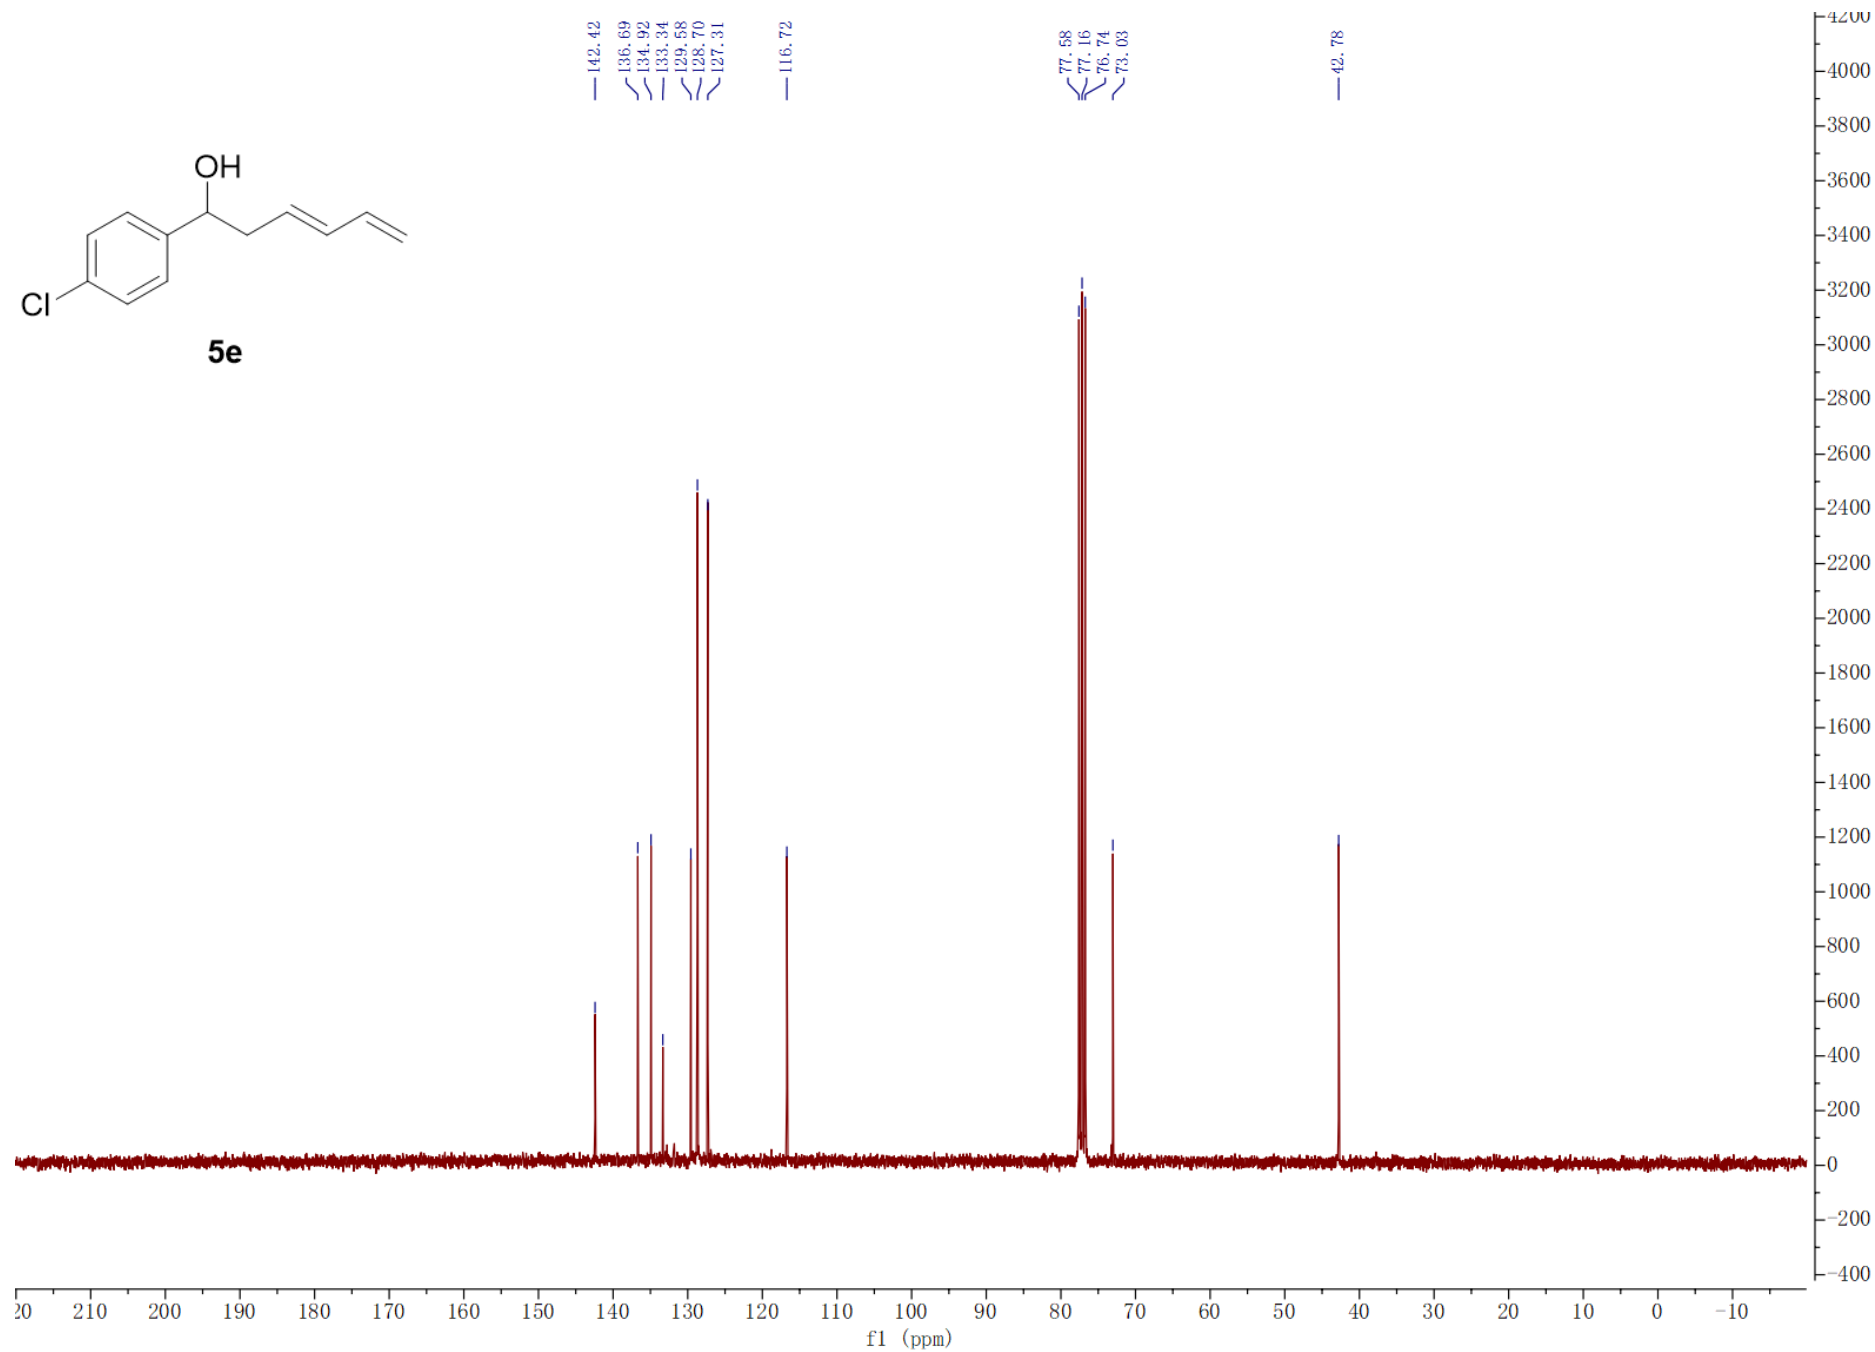

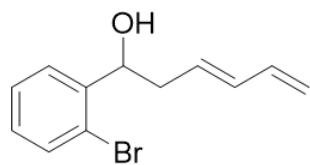

**5f**

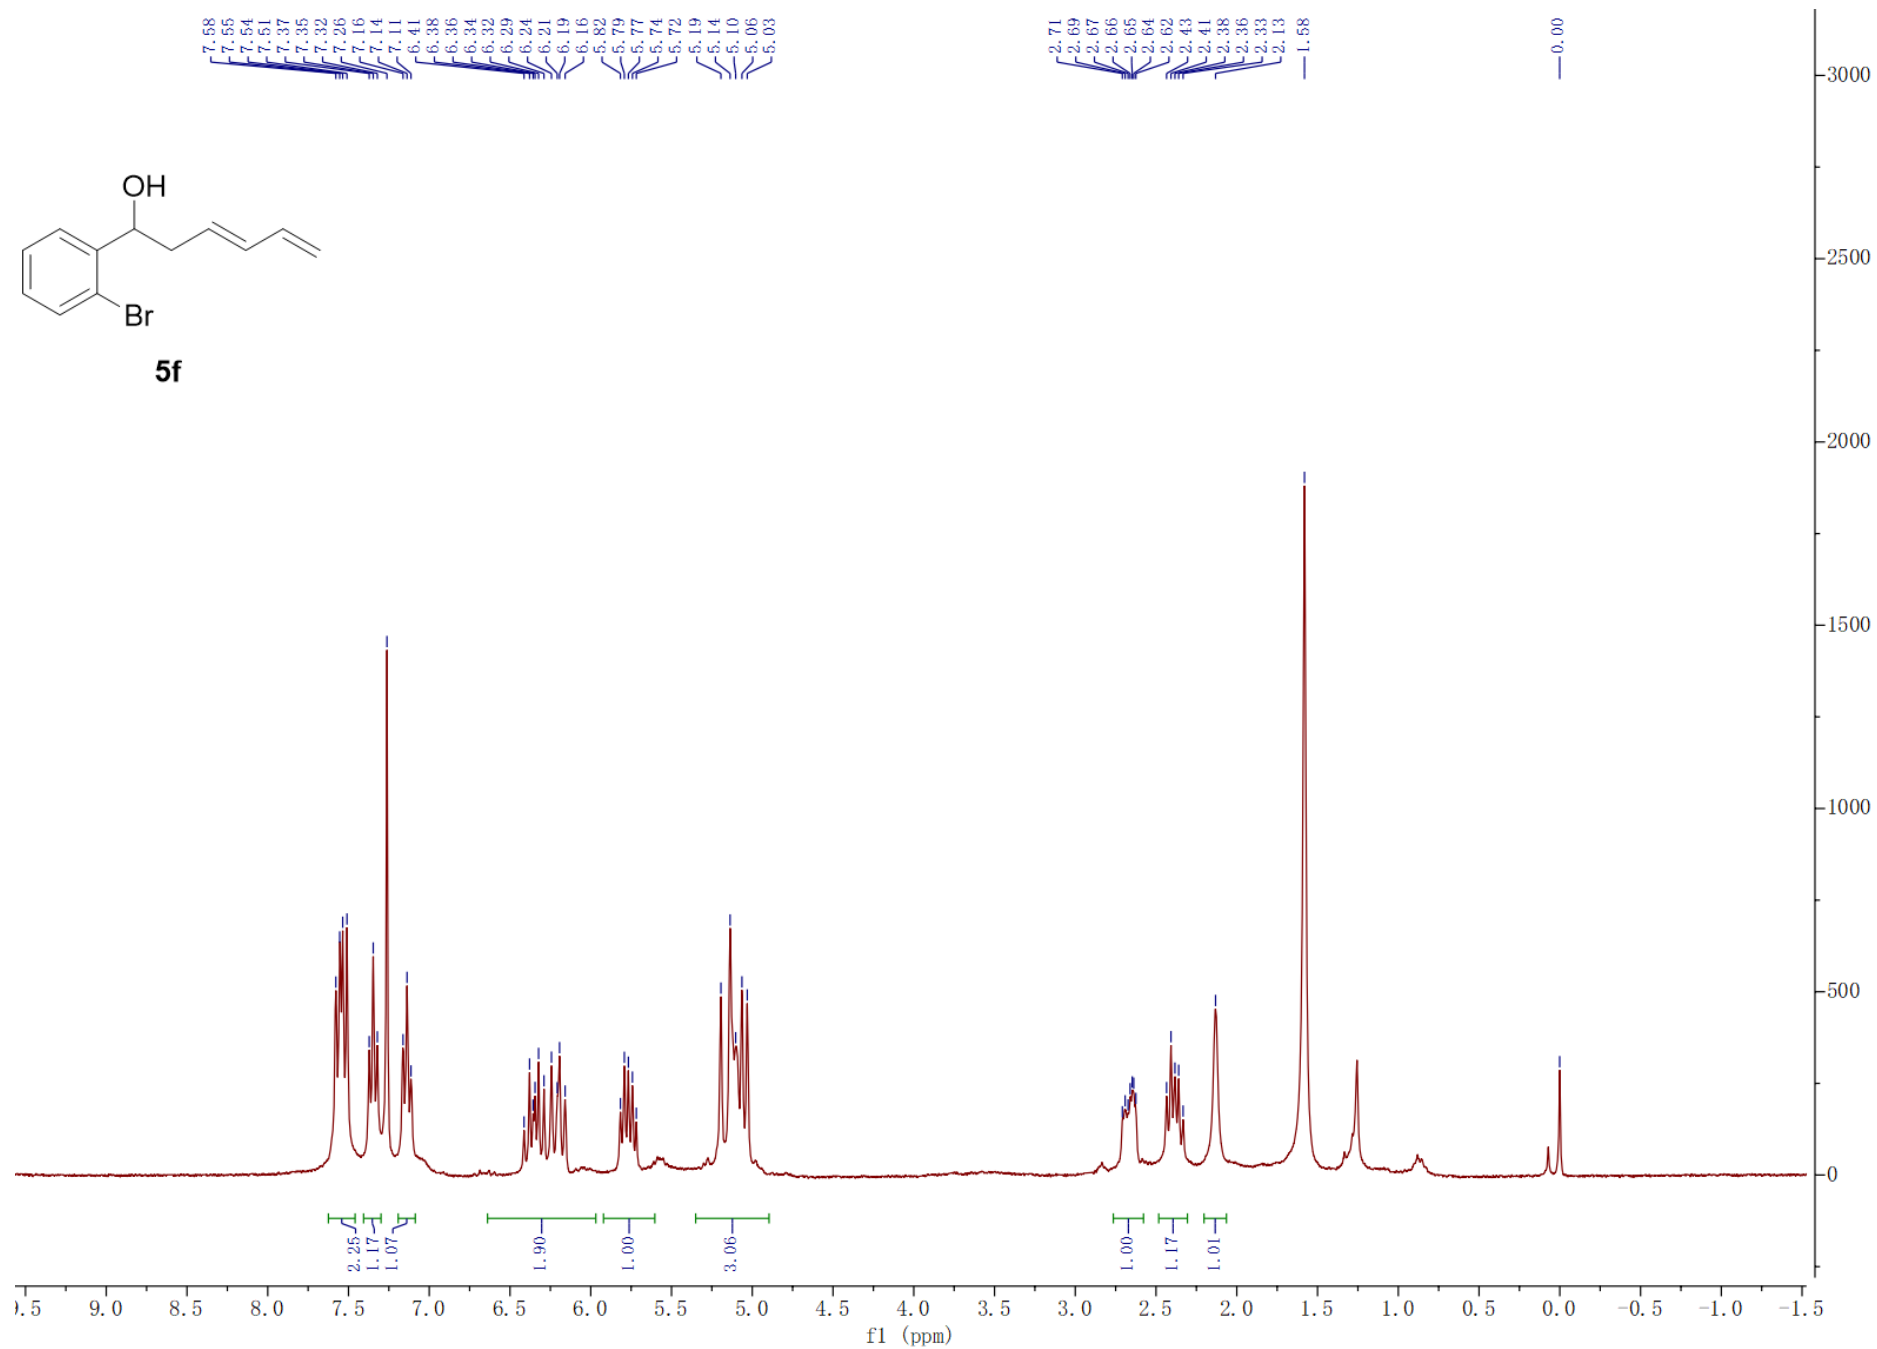



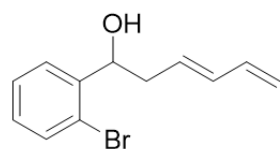

**5f**

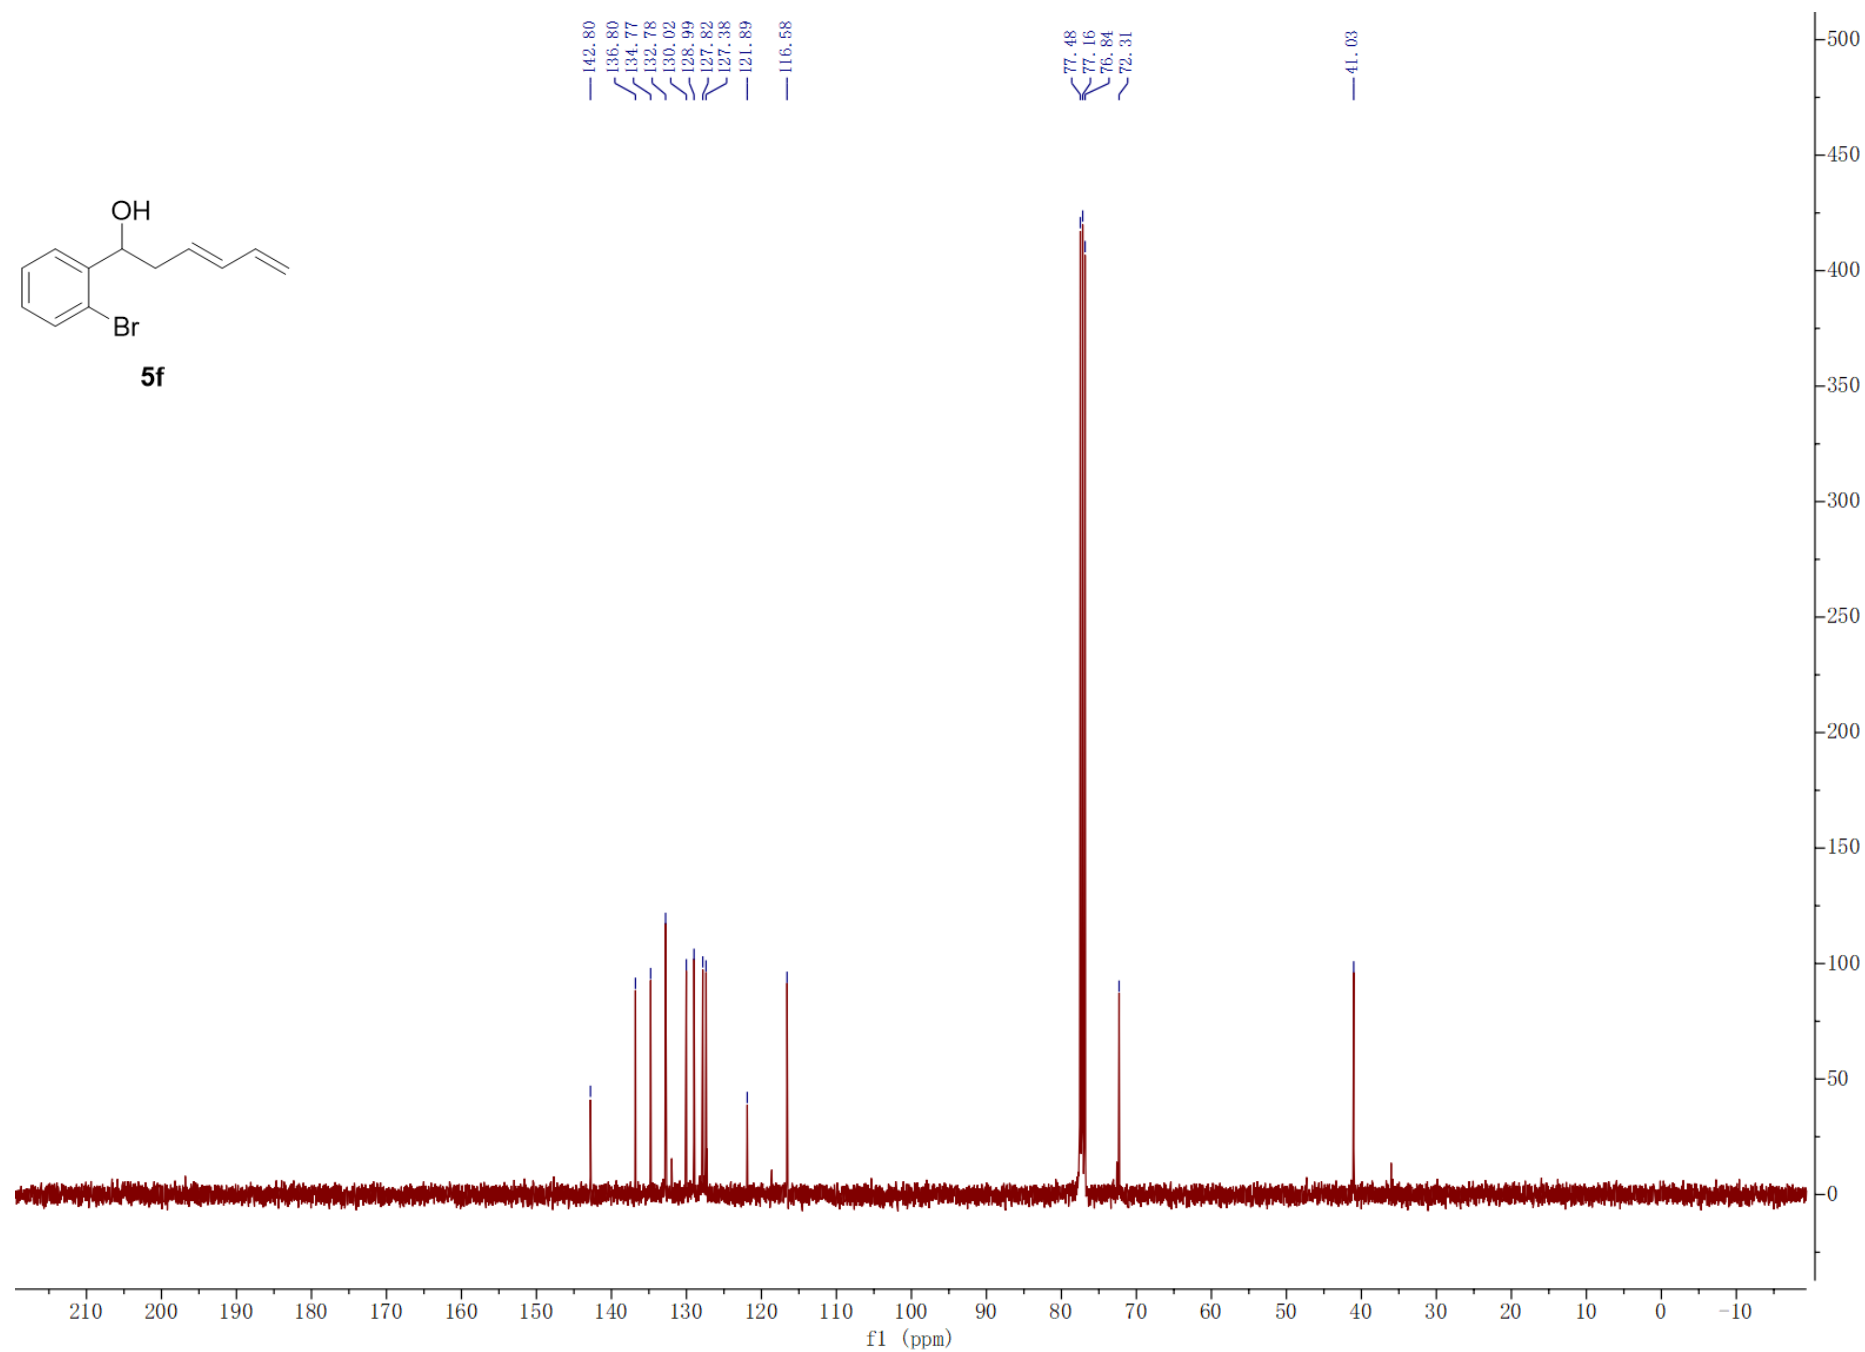

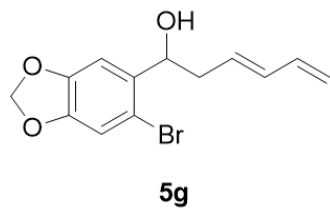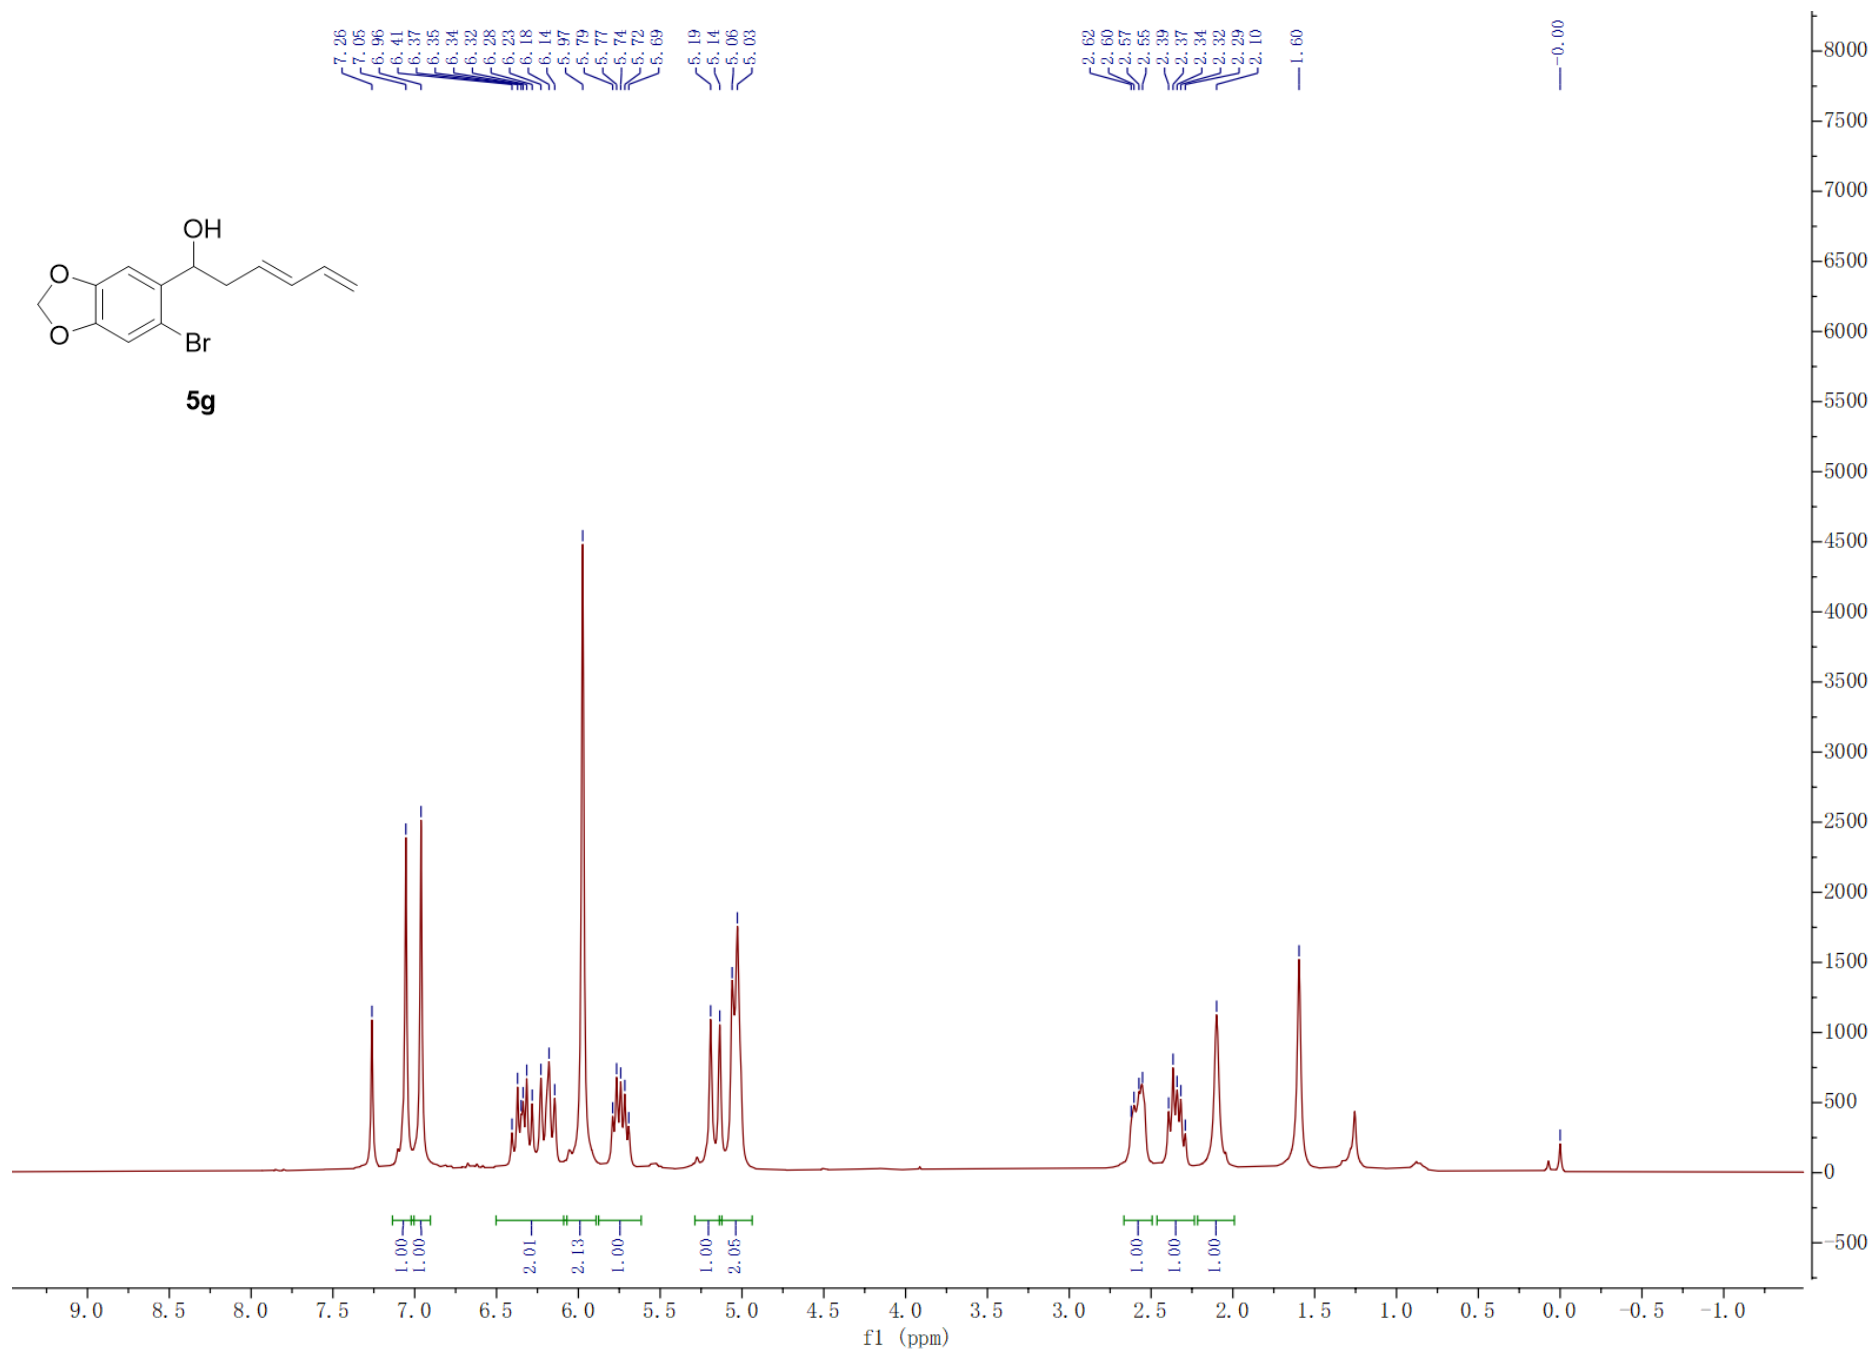

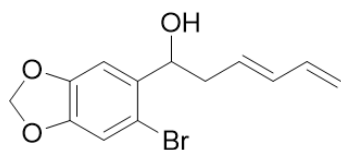

**5g**

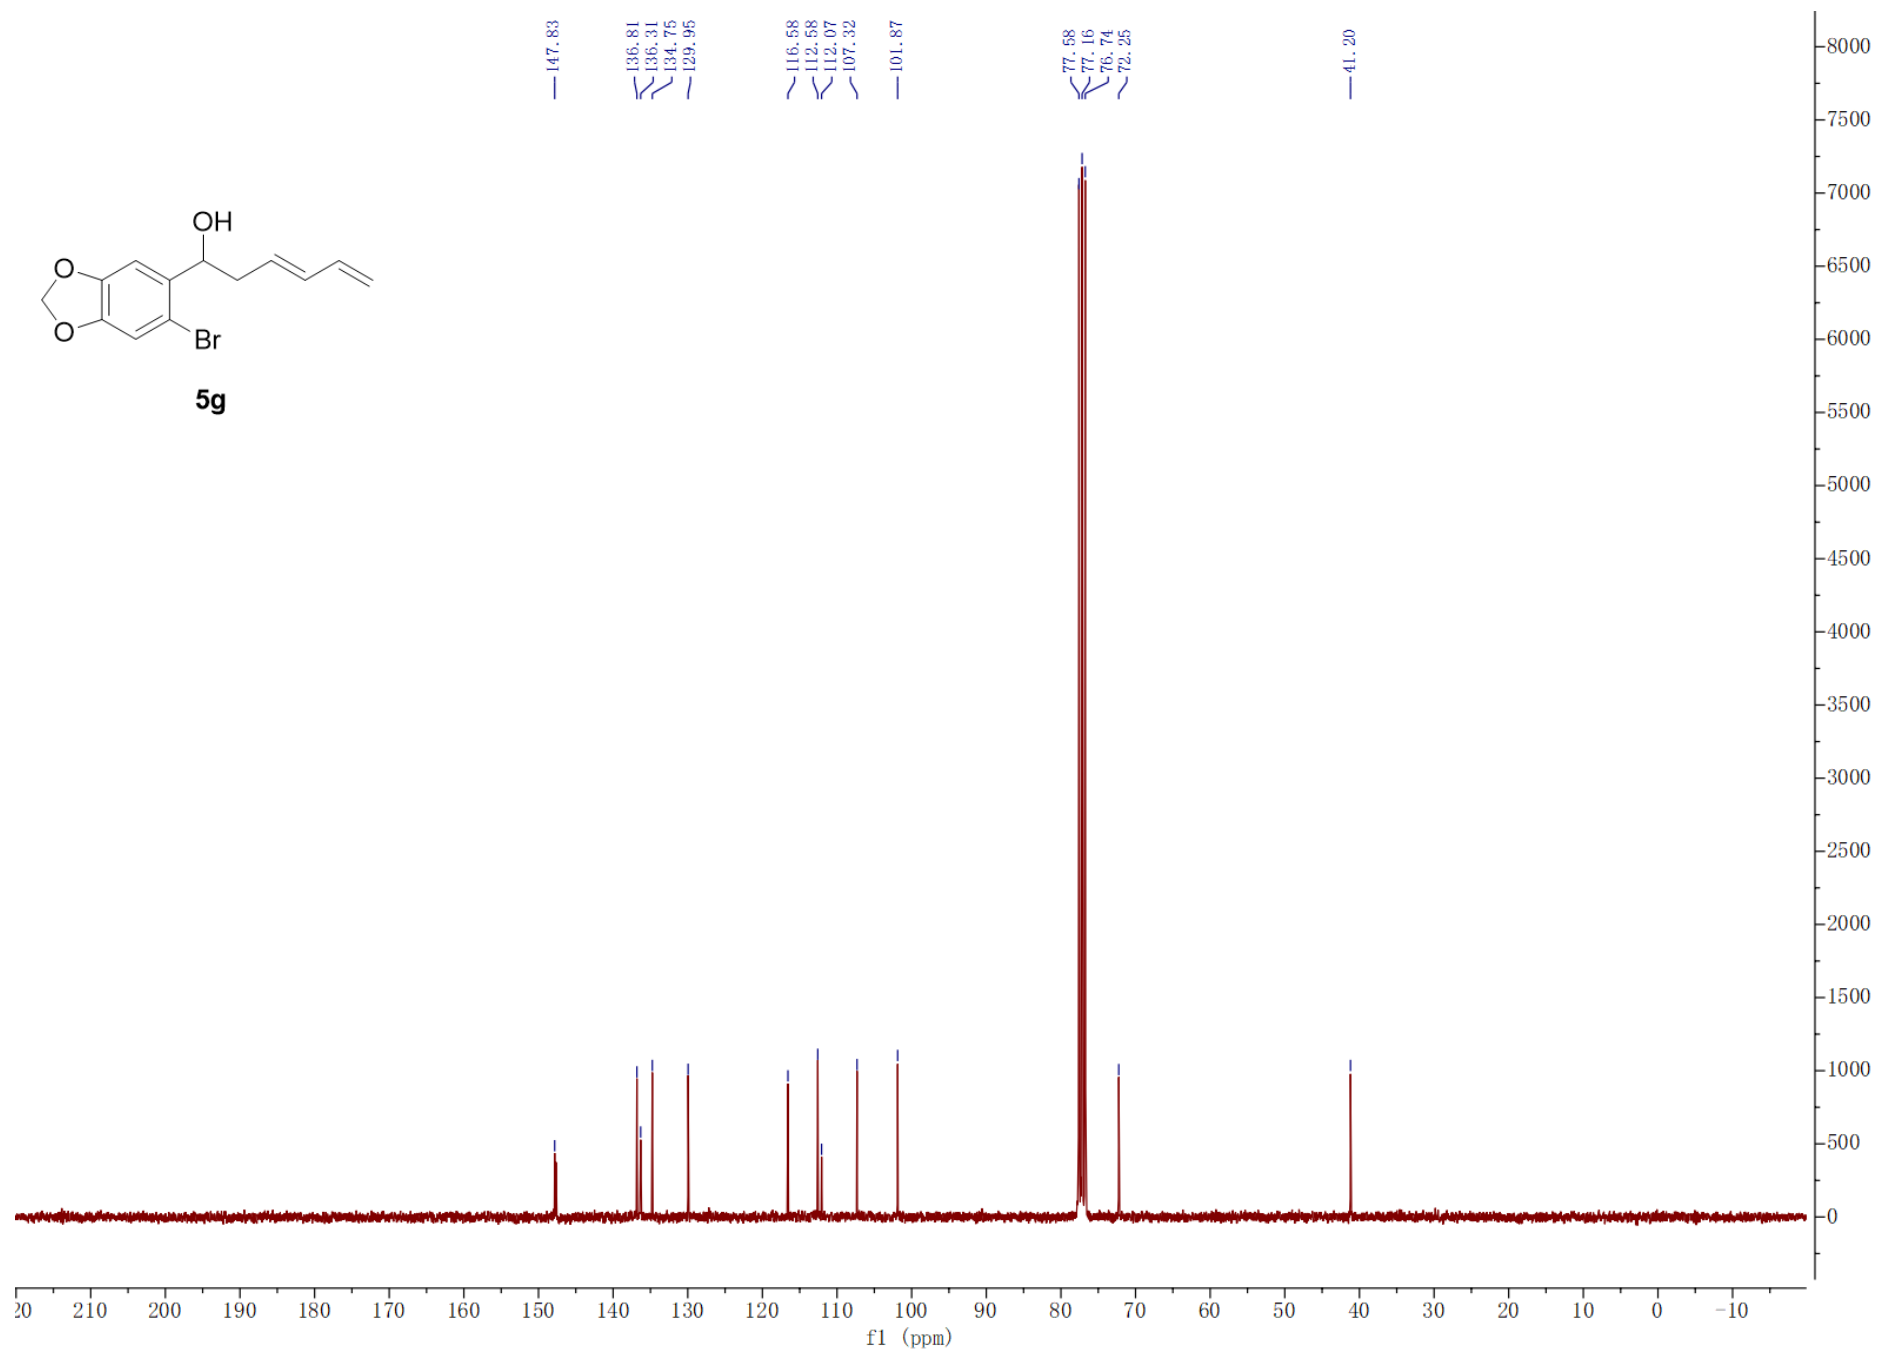

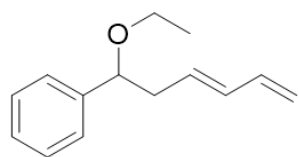

**5h**

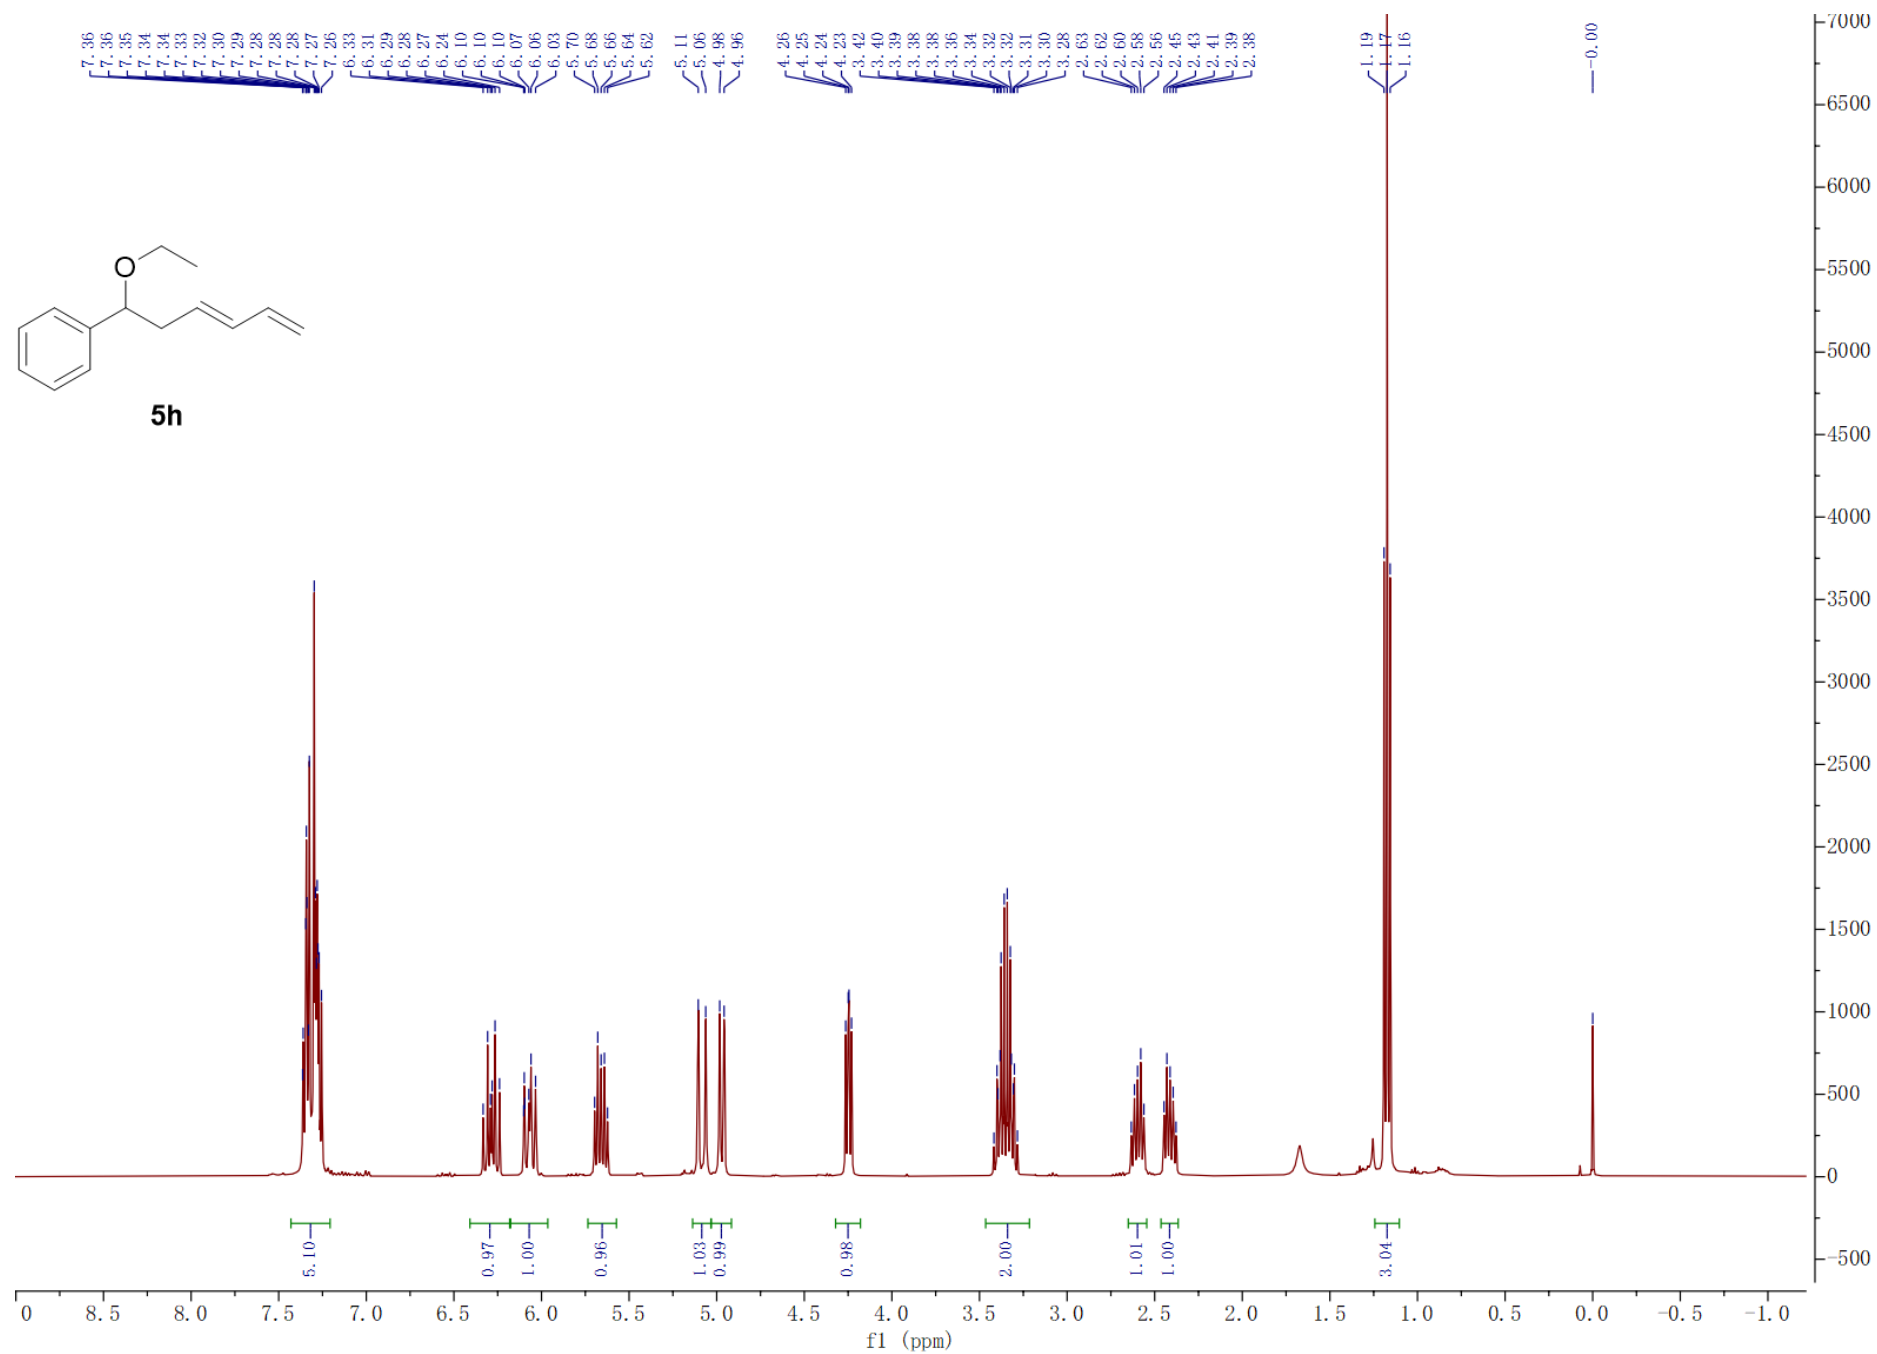

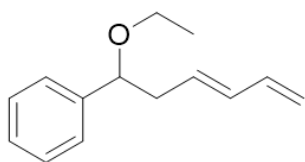

**5h**

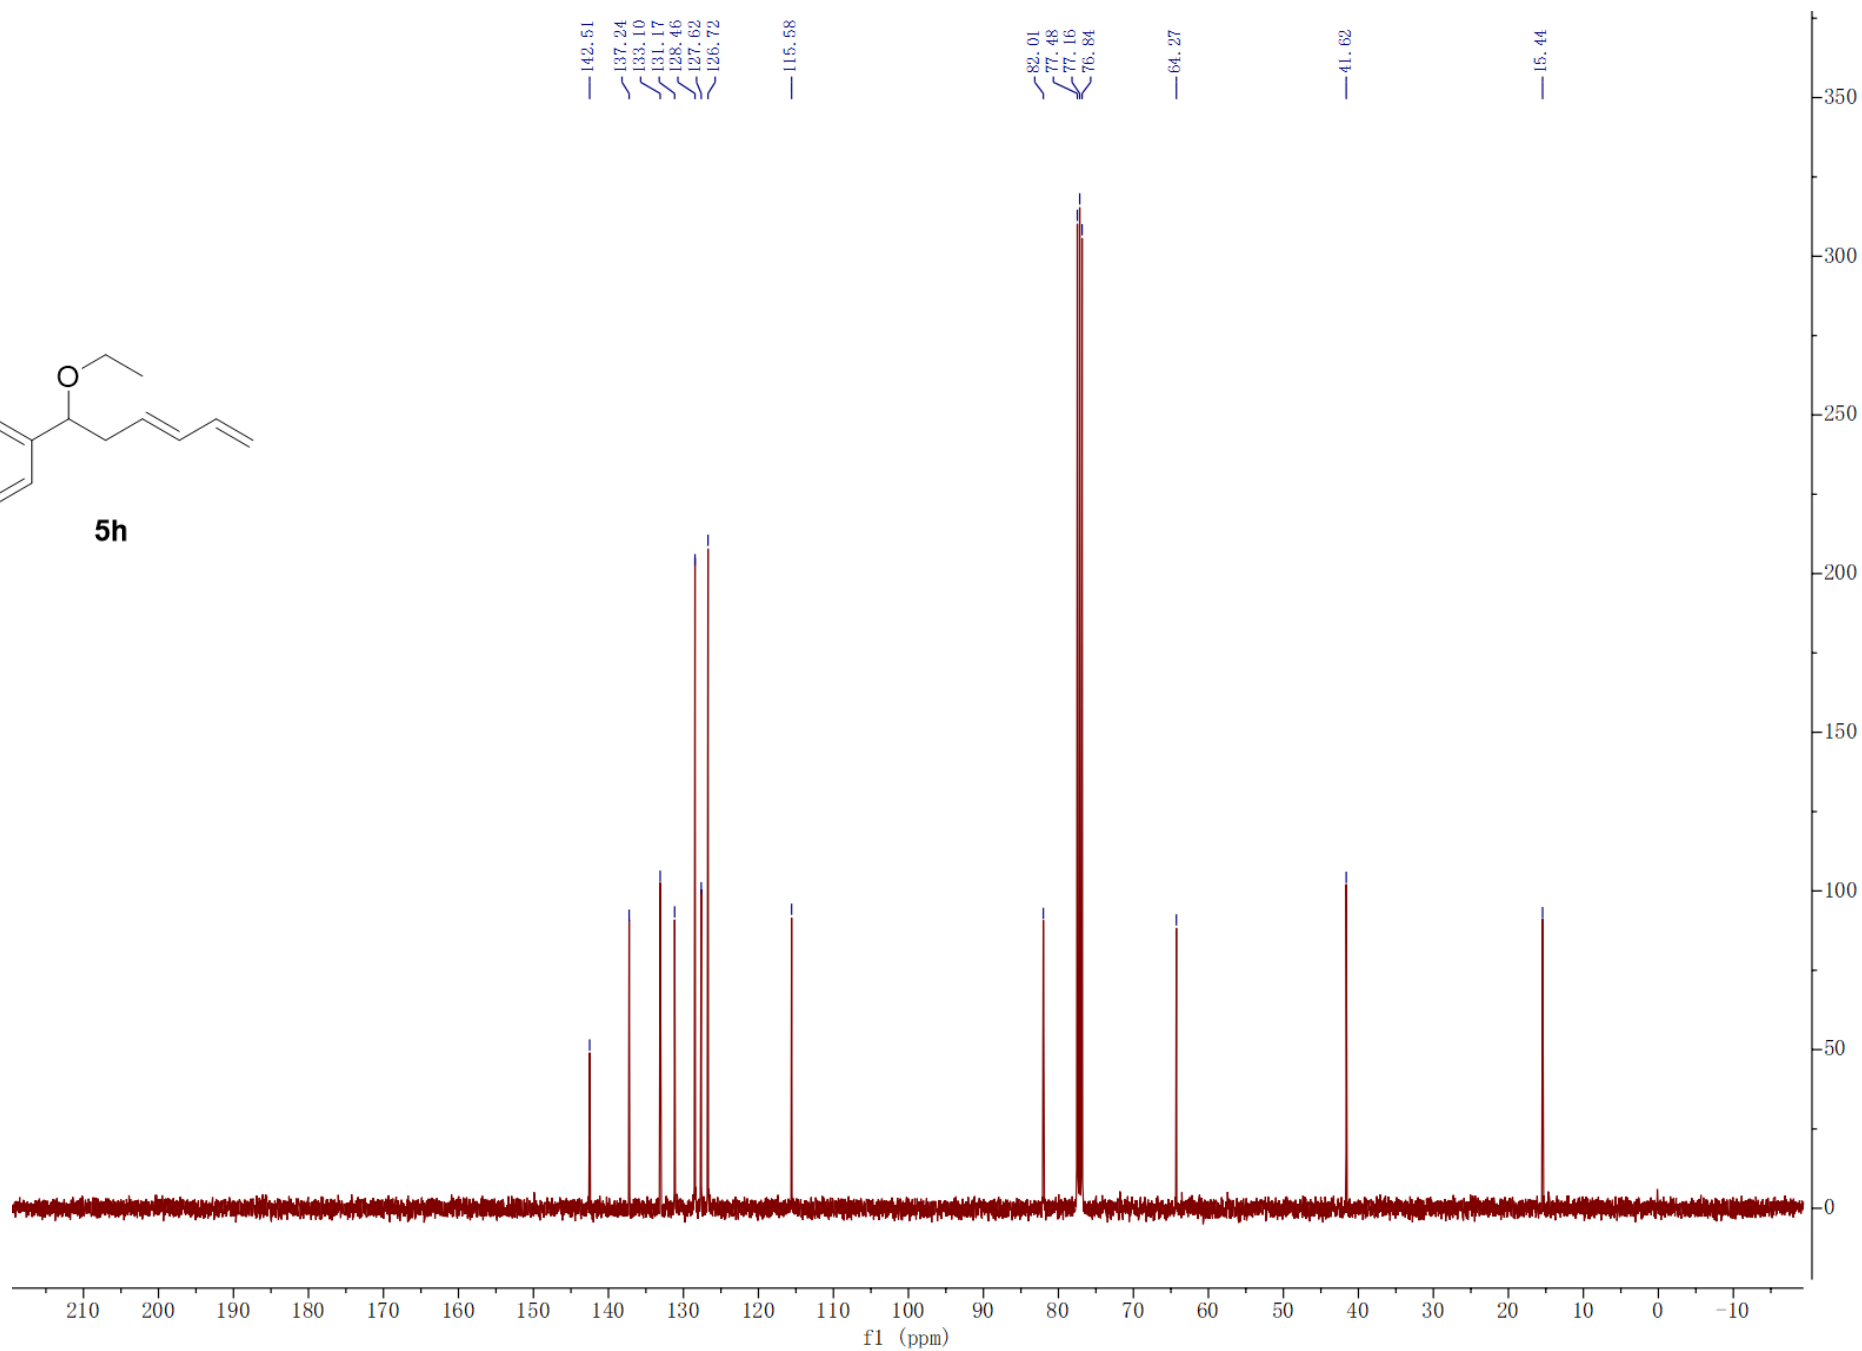

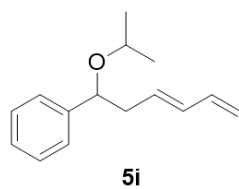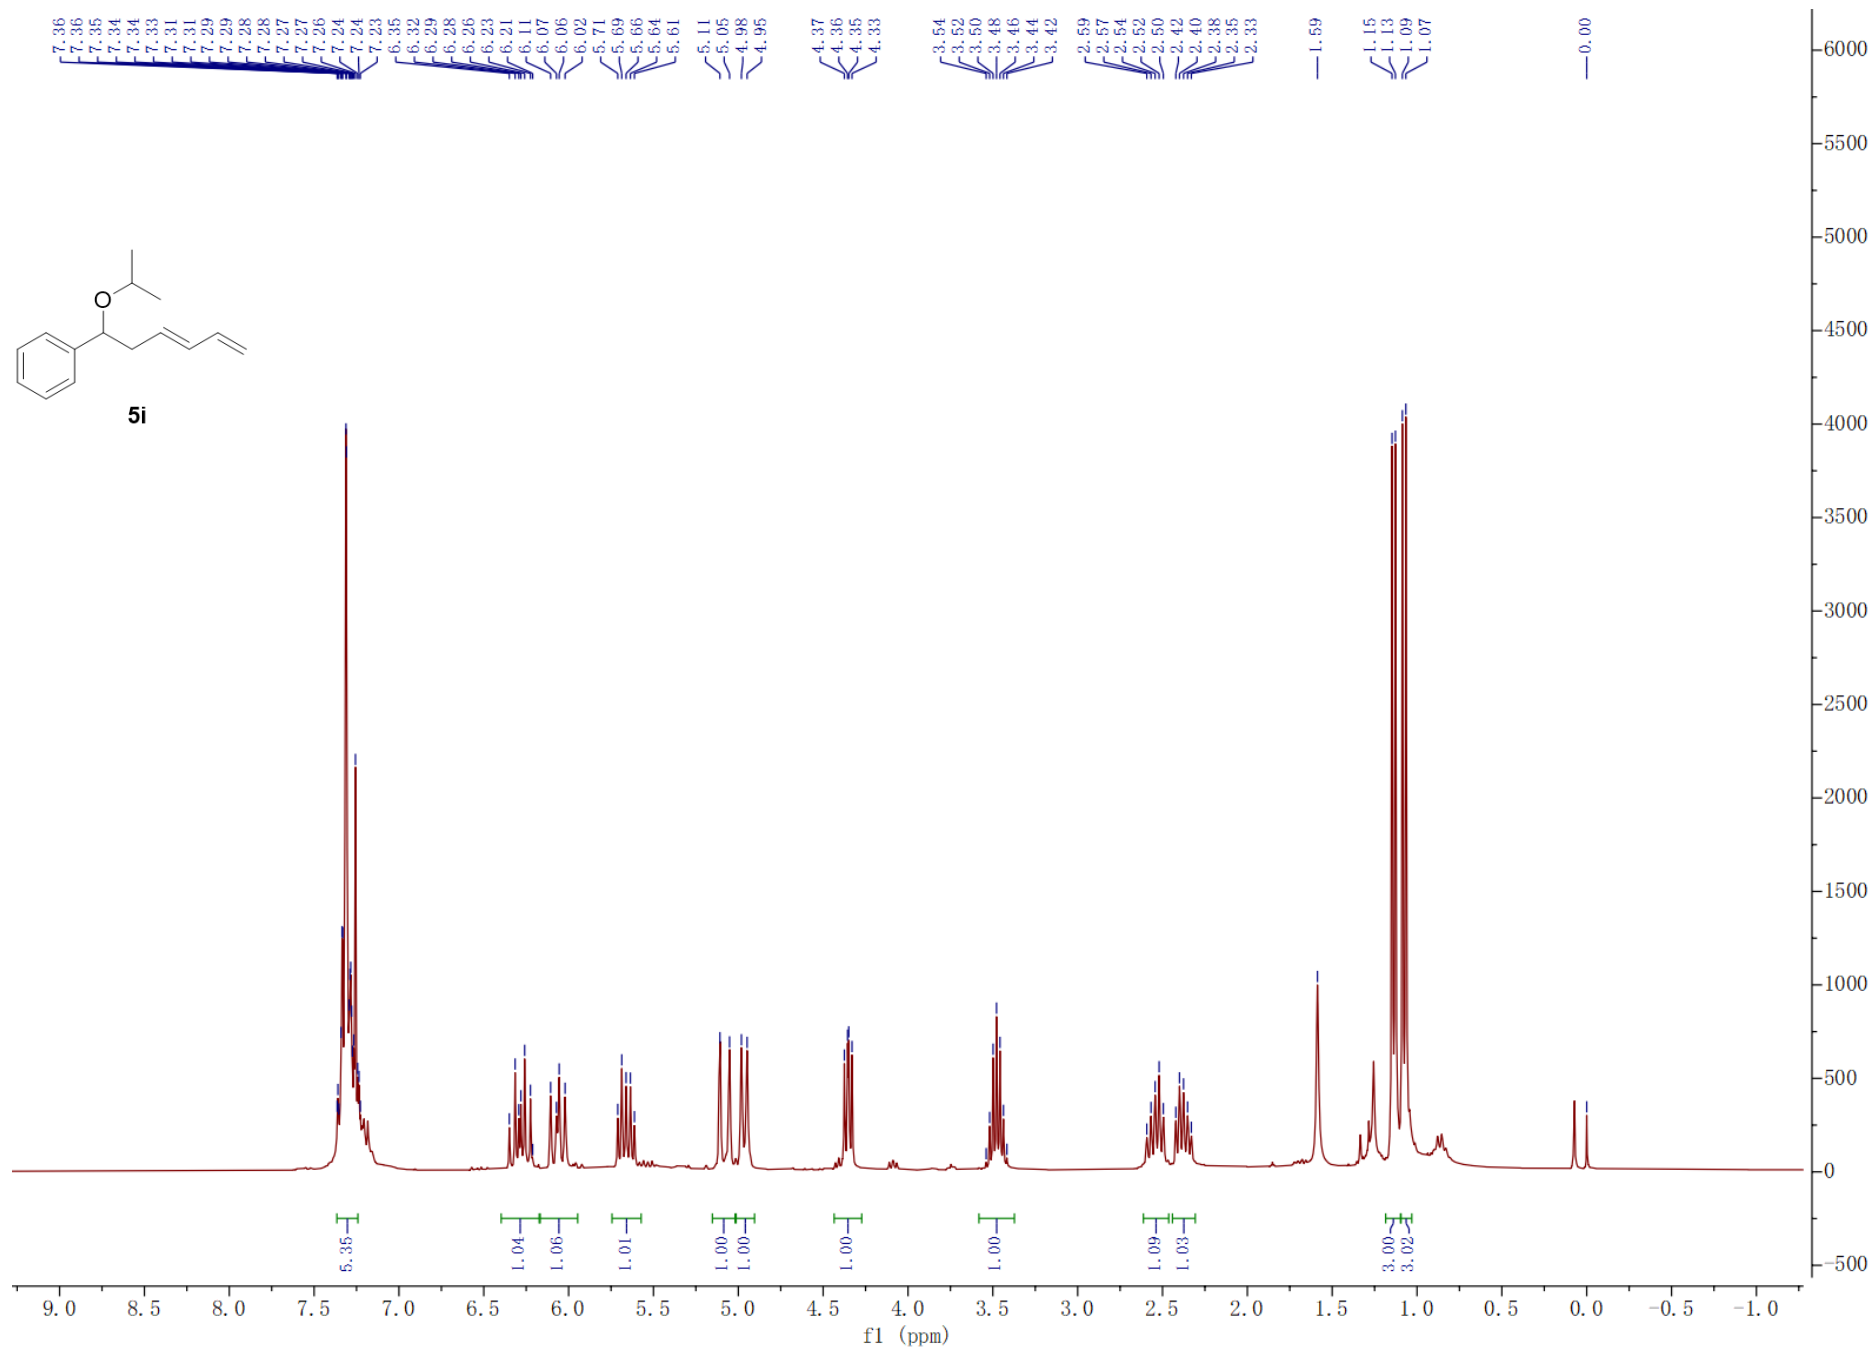

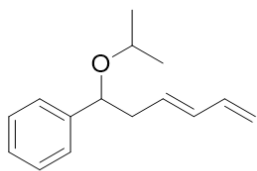

**5i**

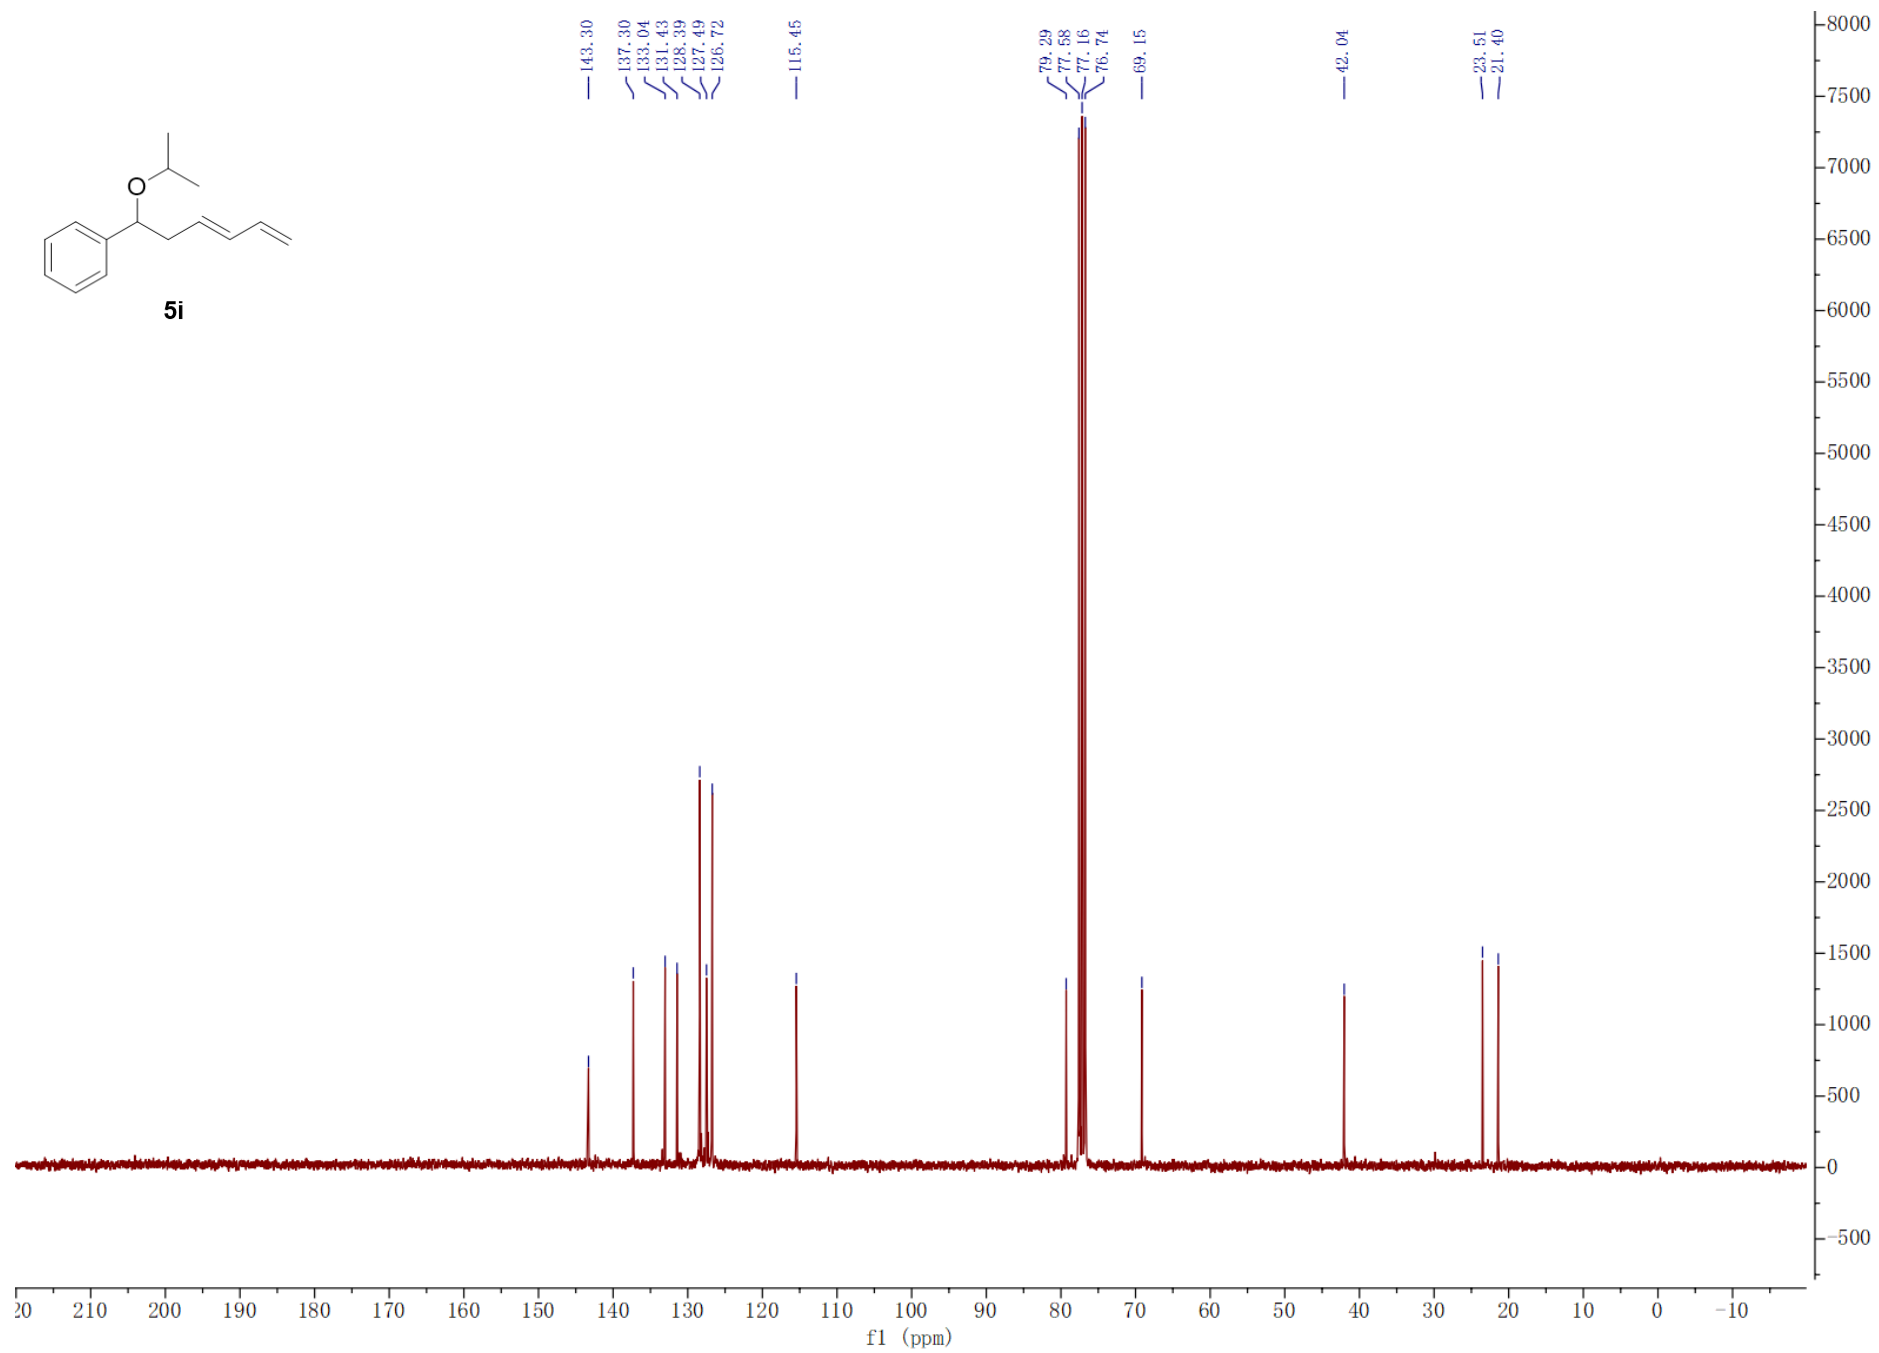

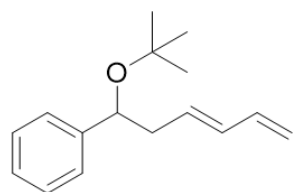

**5j**

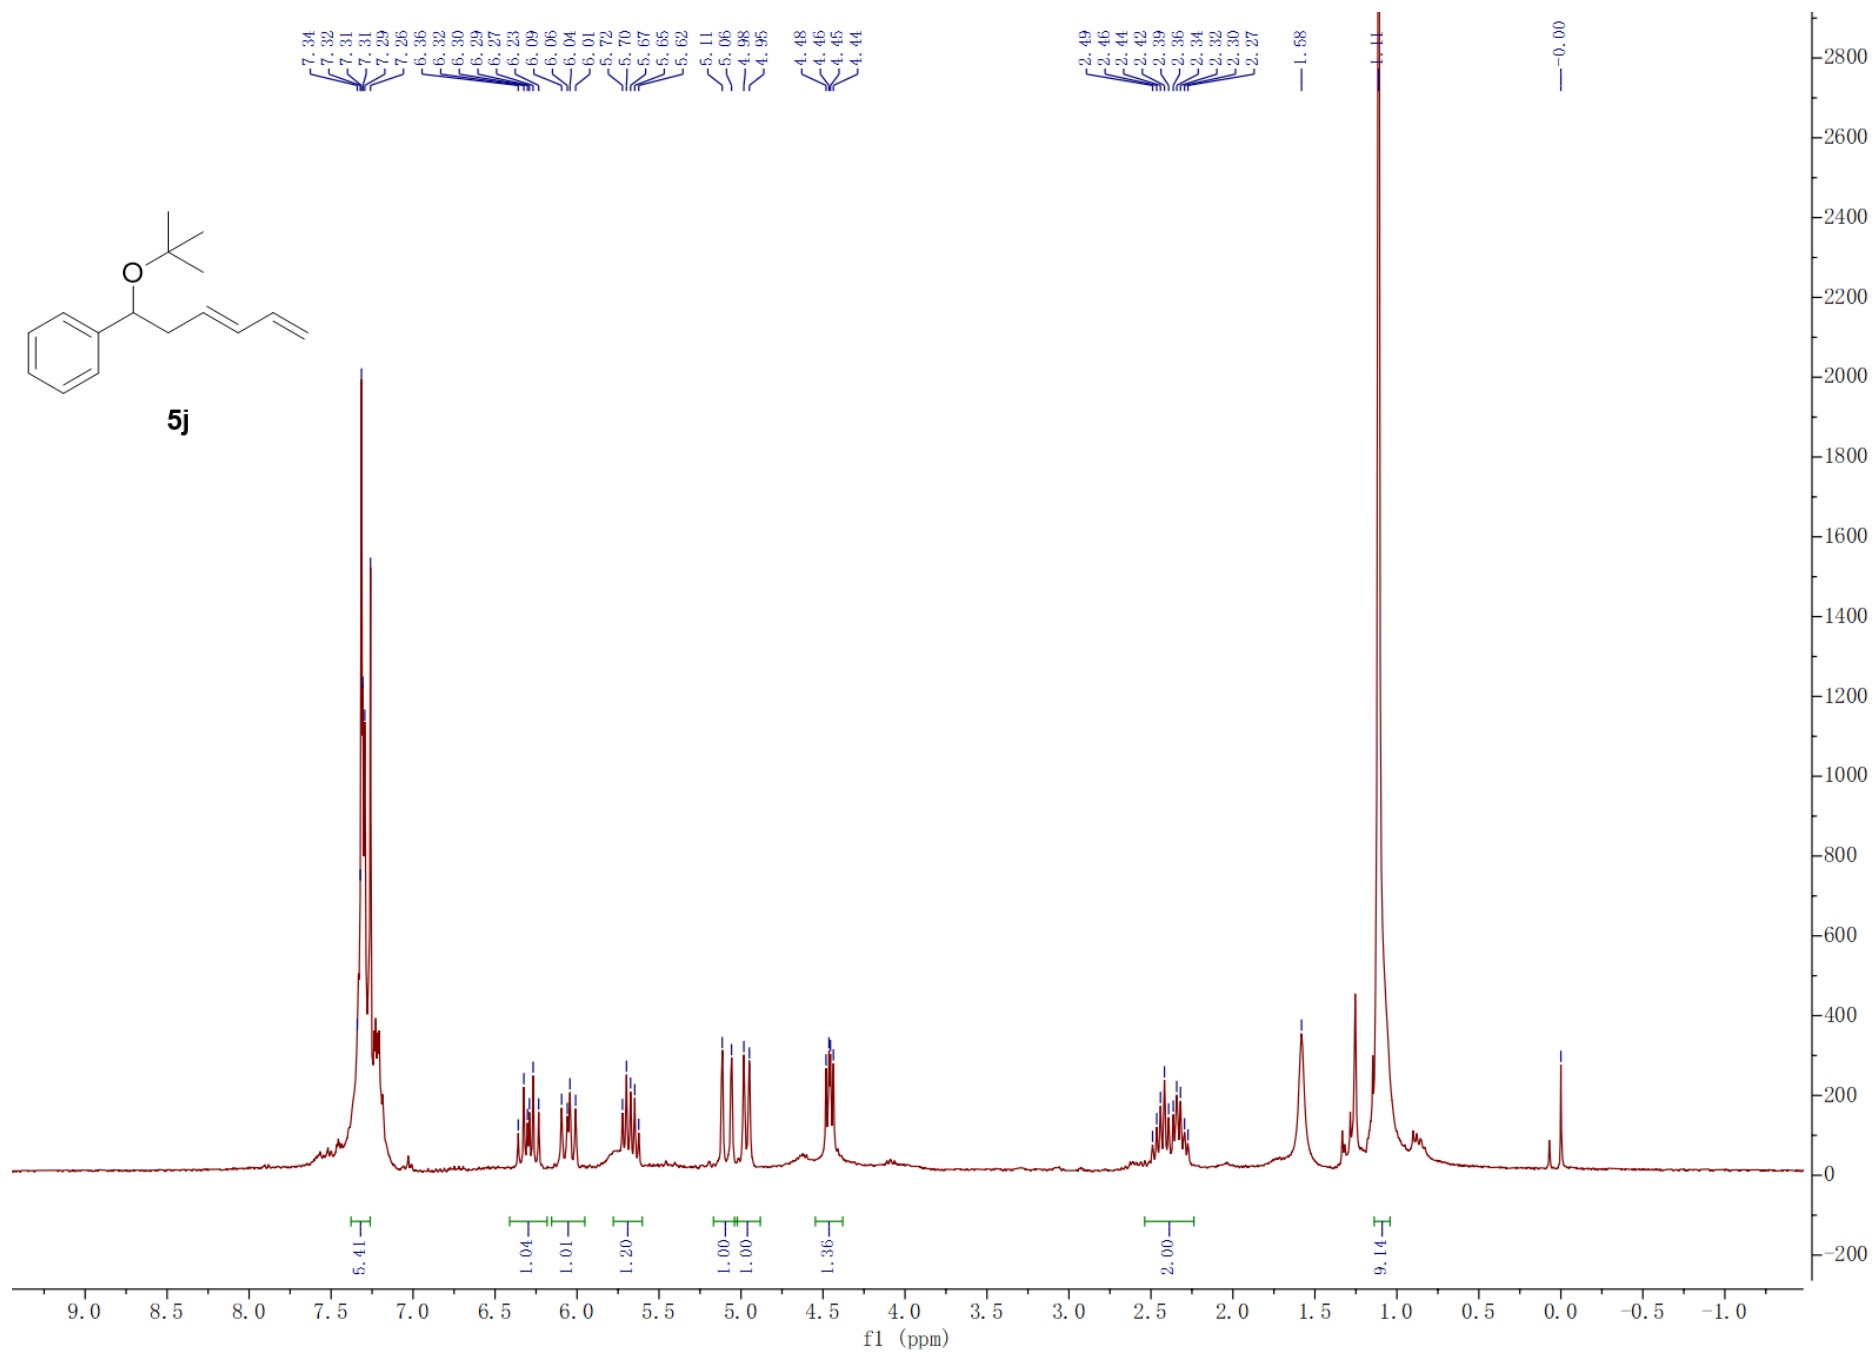



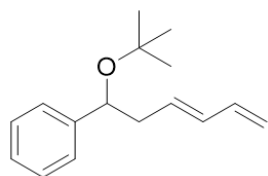

**5j**

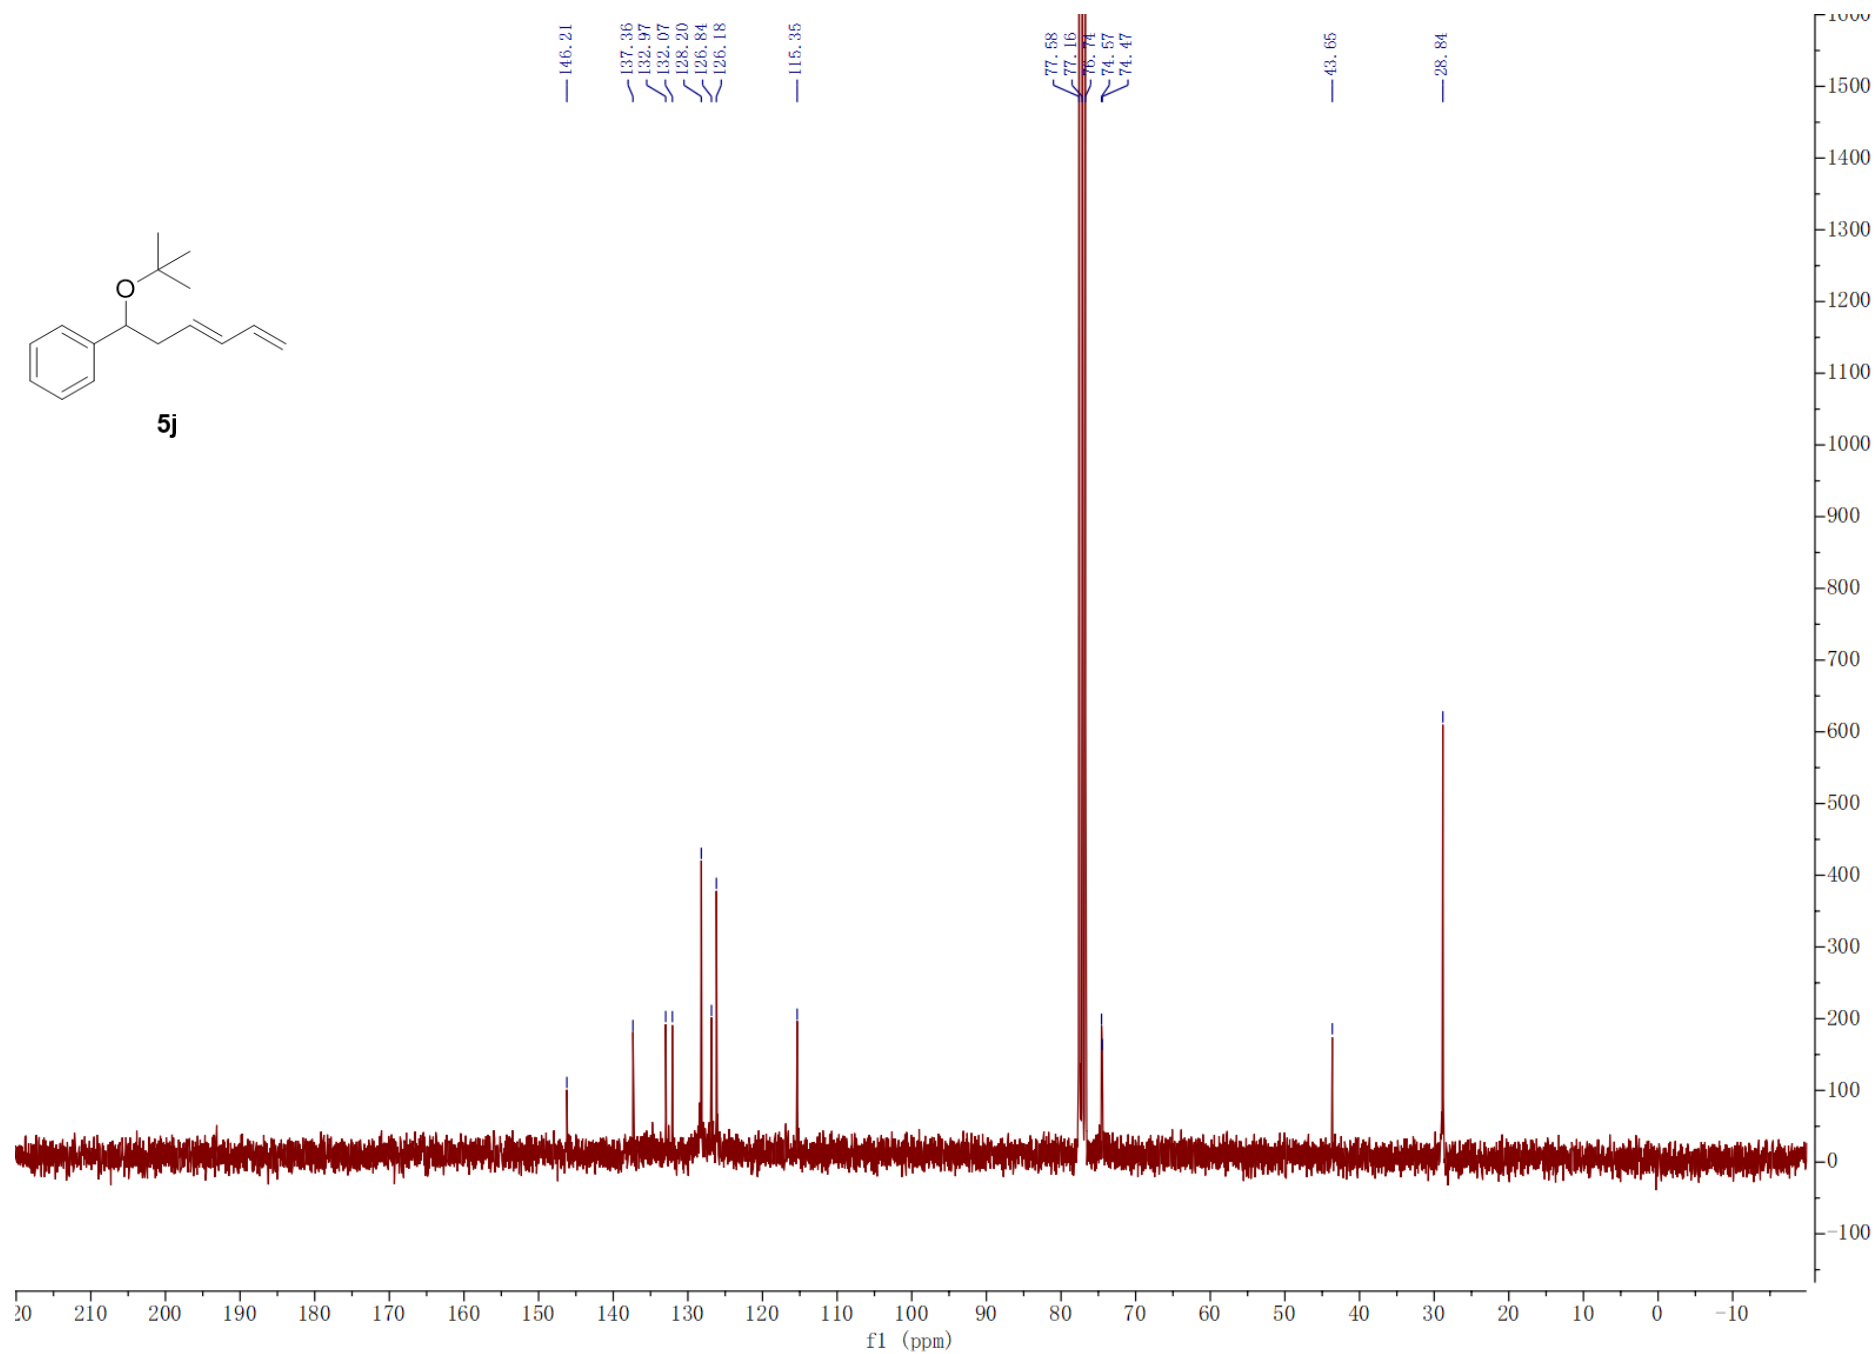

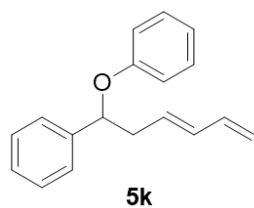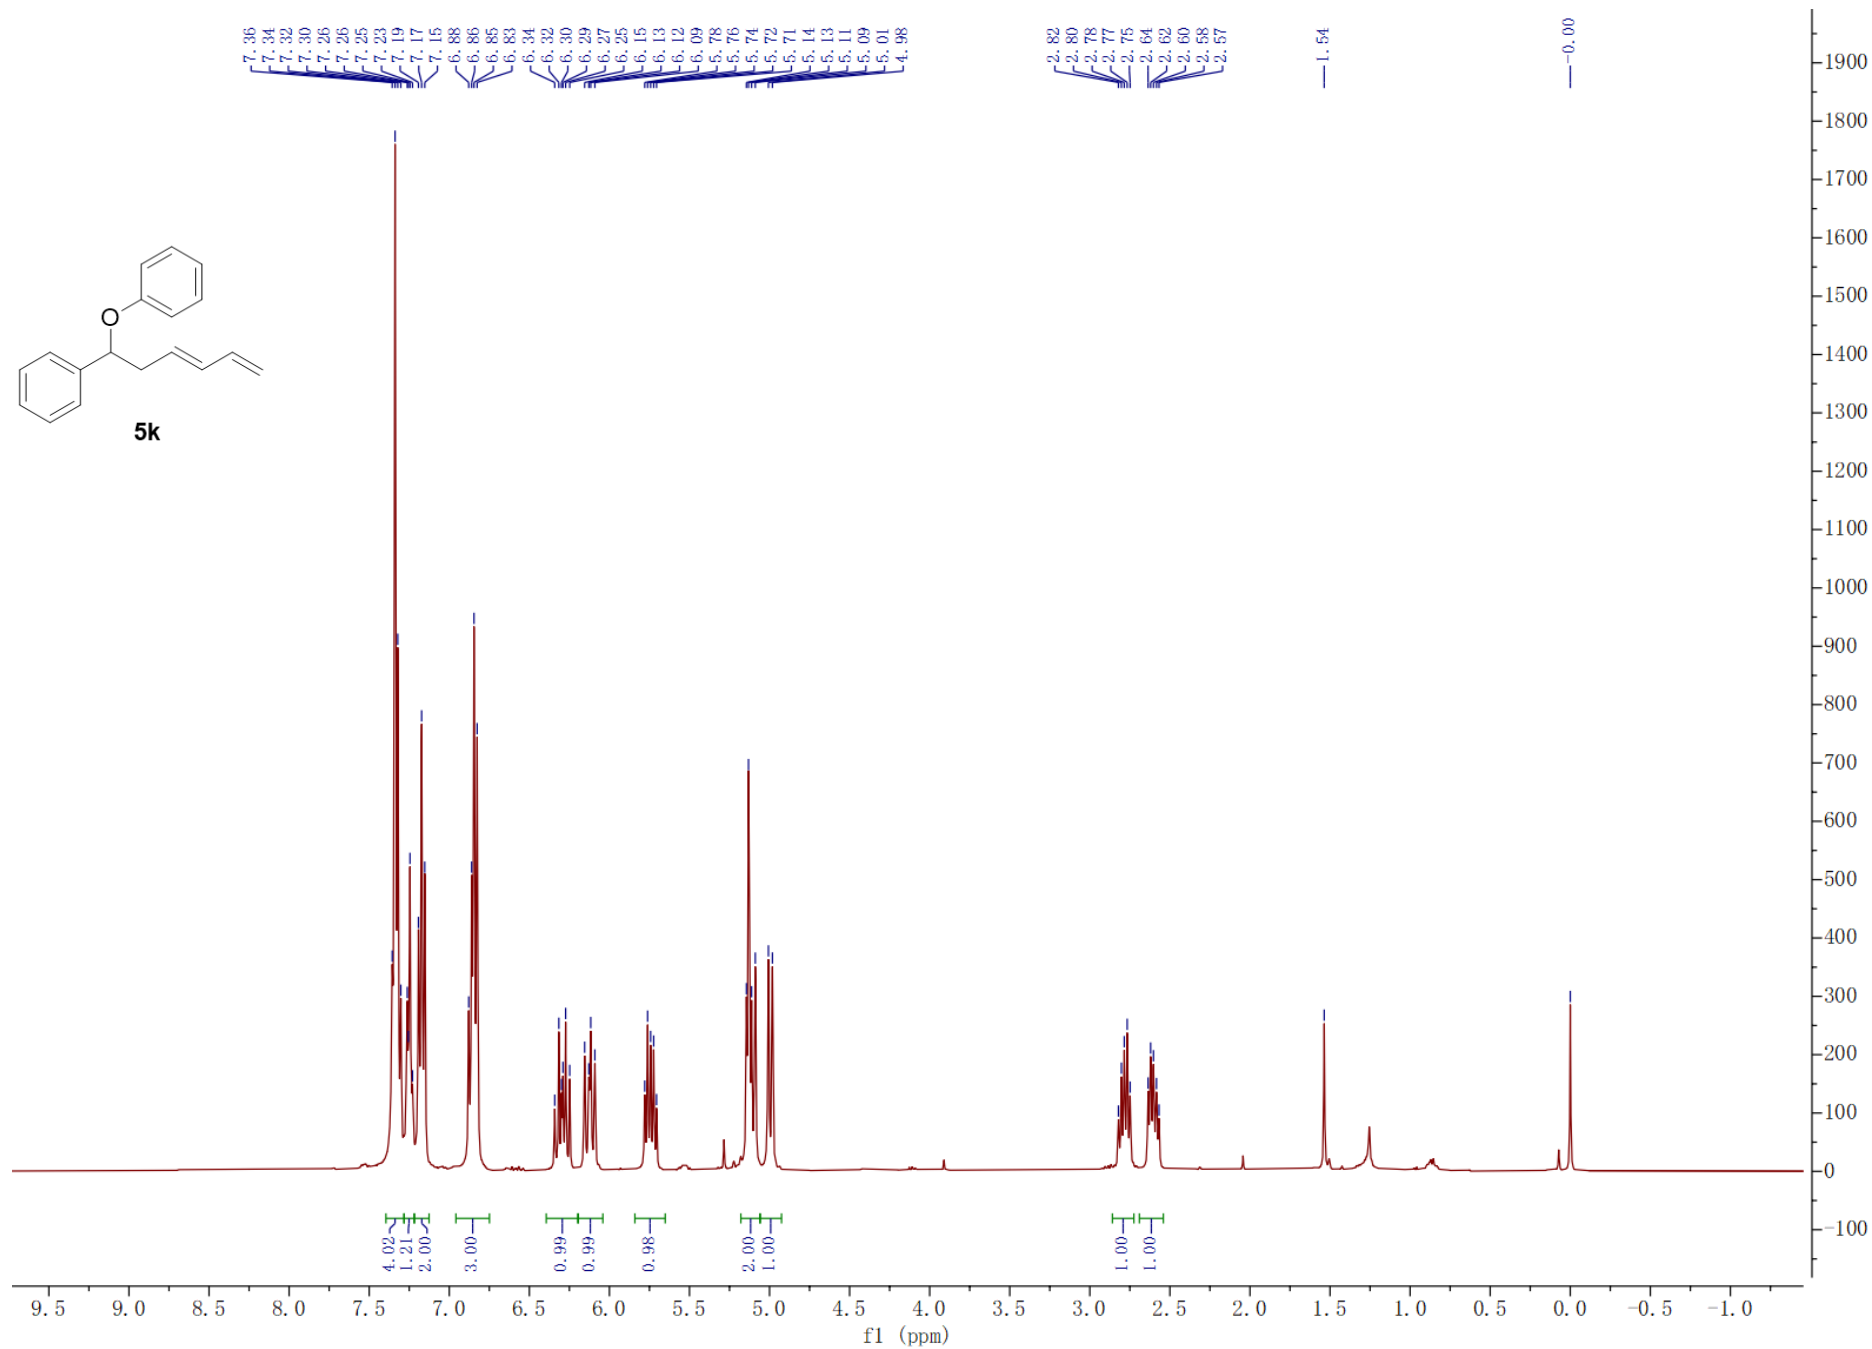

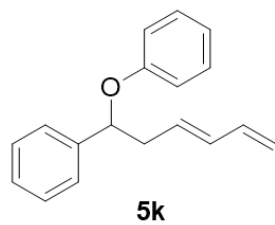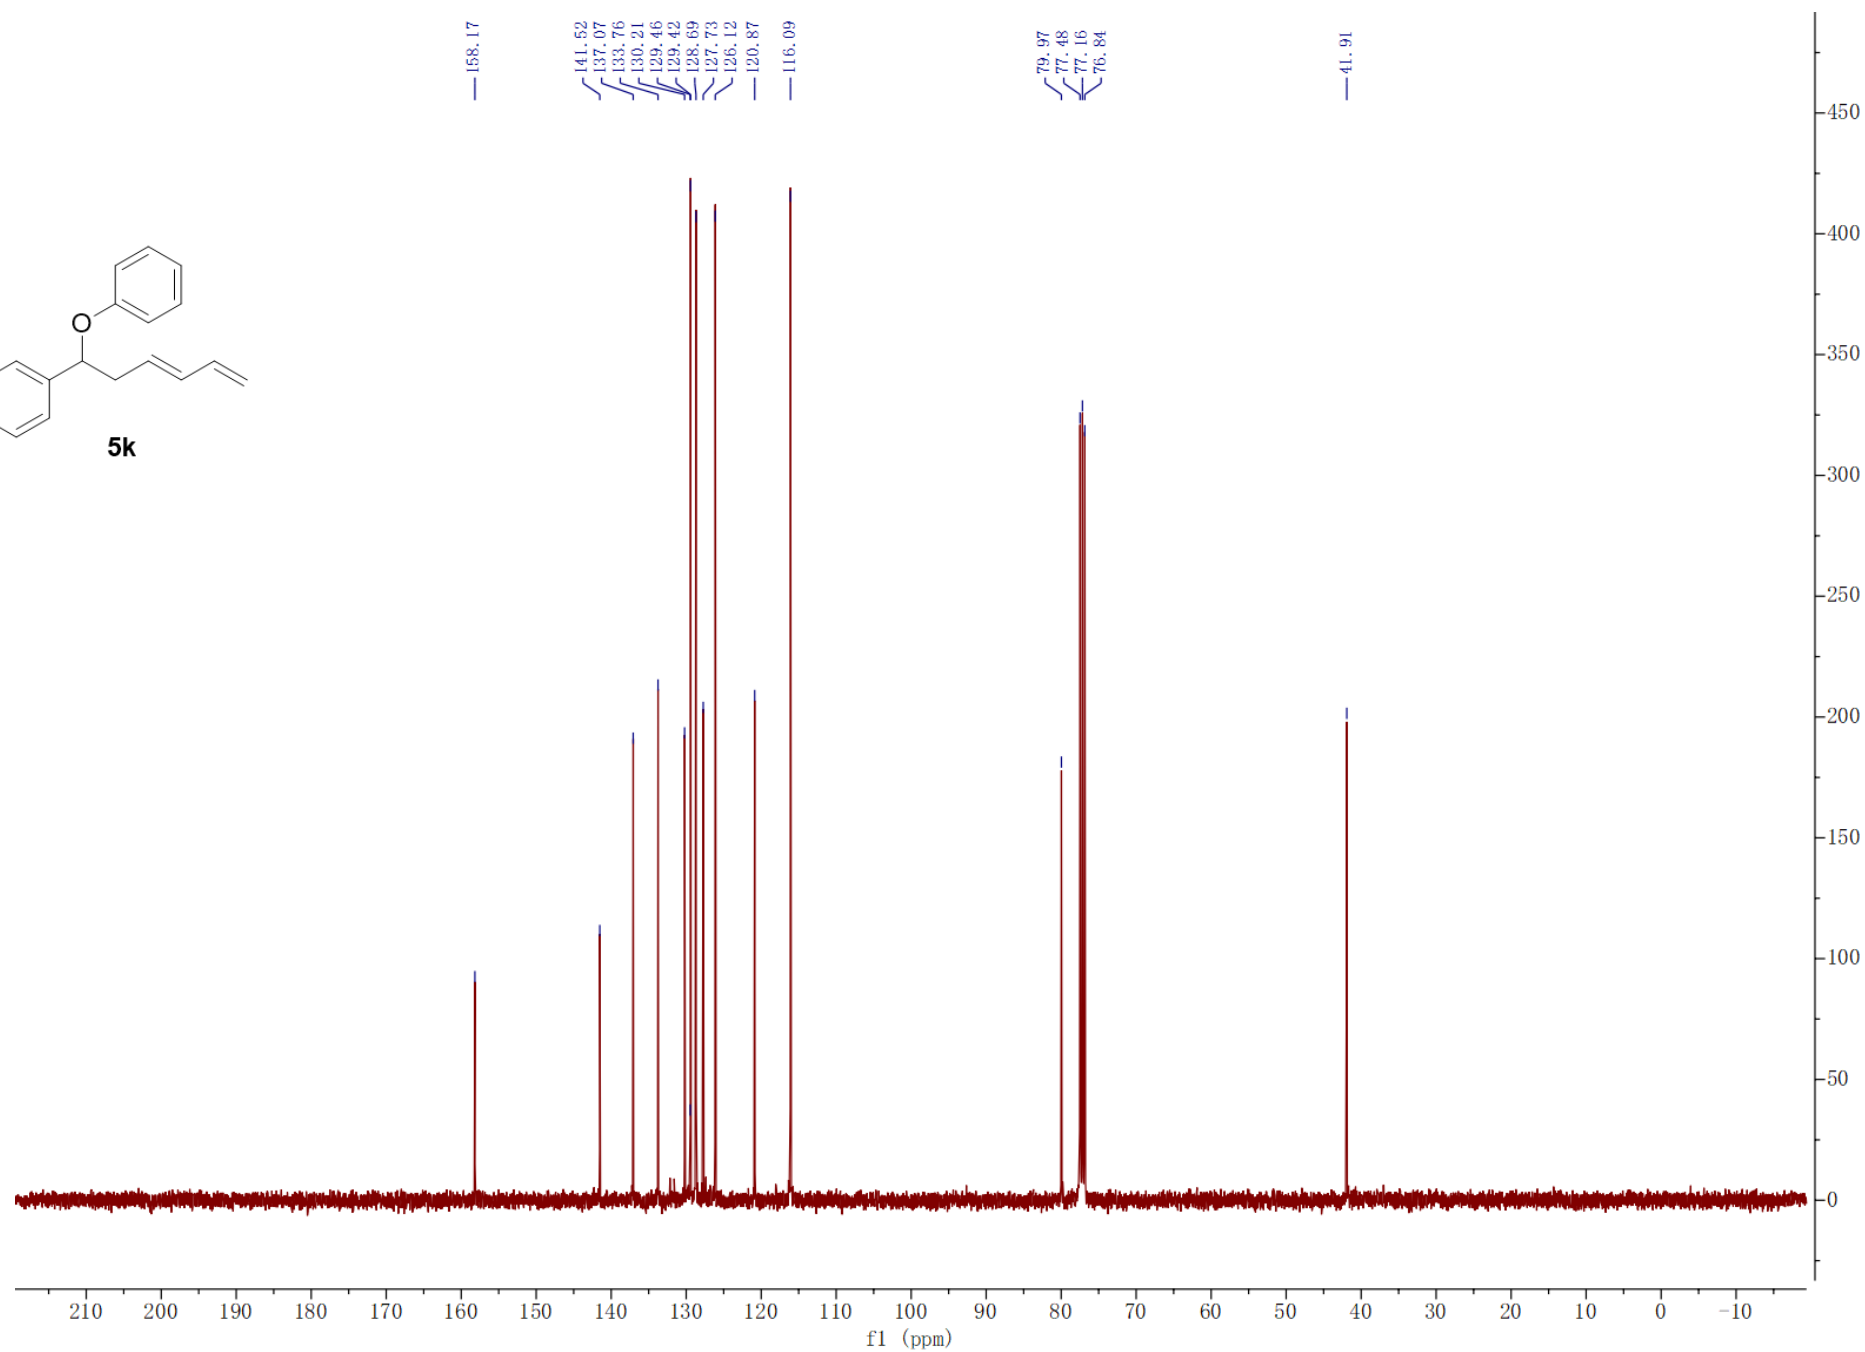

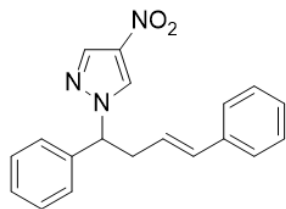

**6**

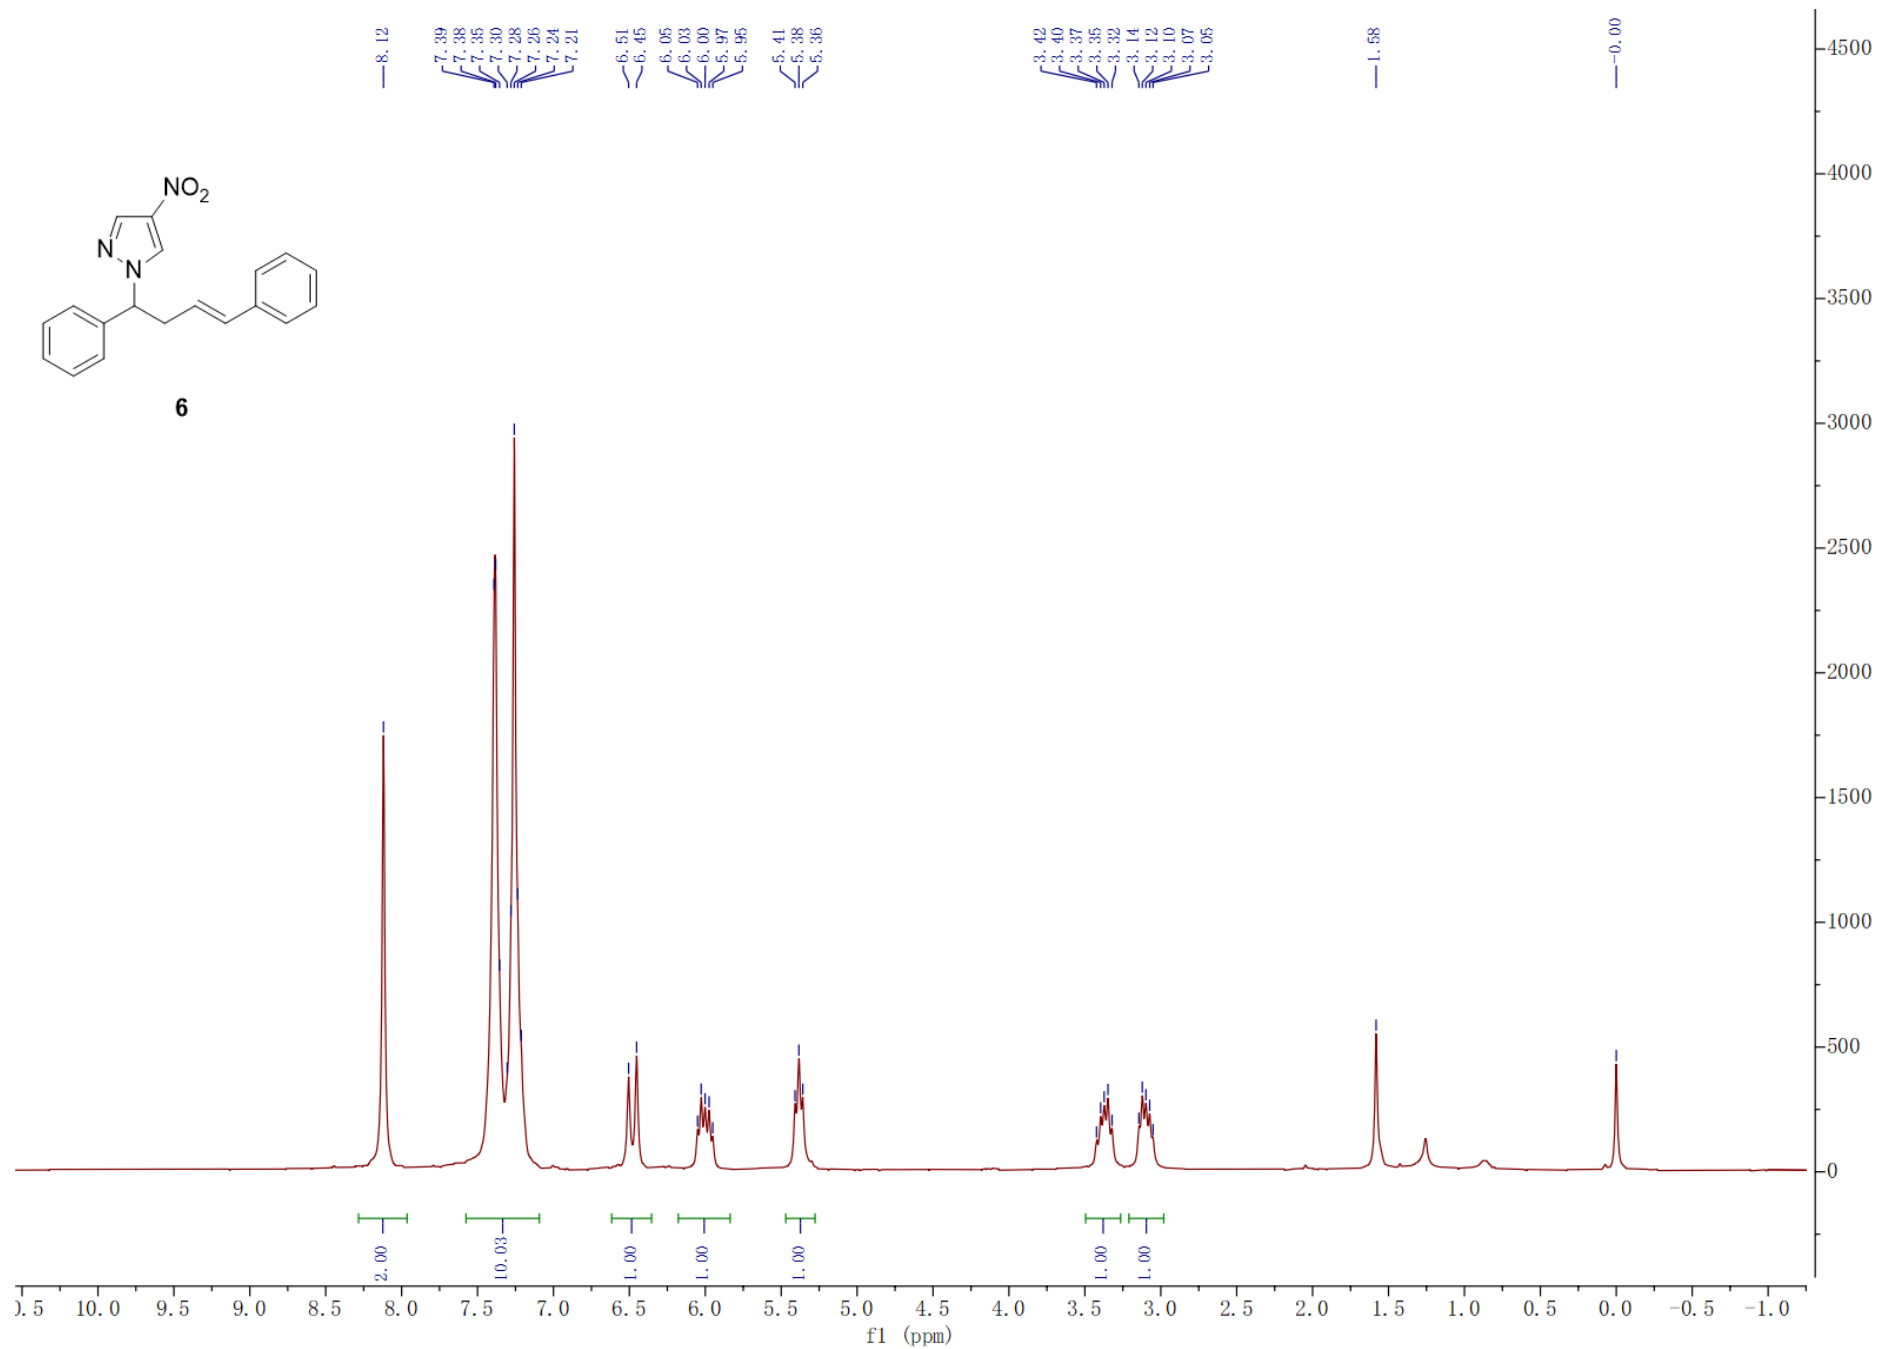

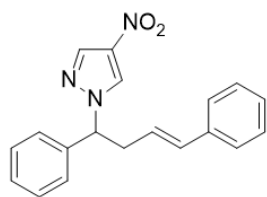

**6**

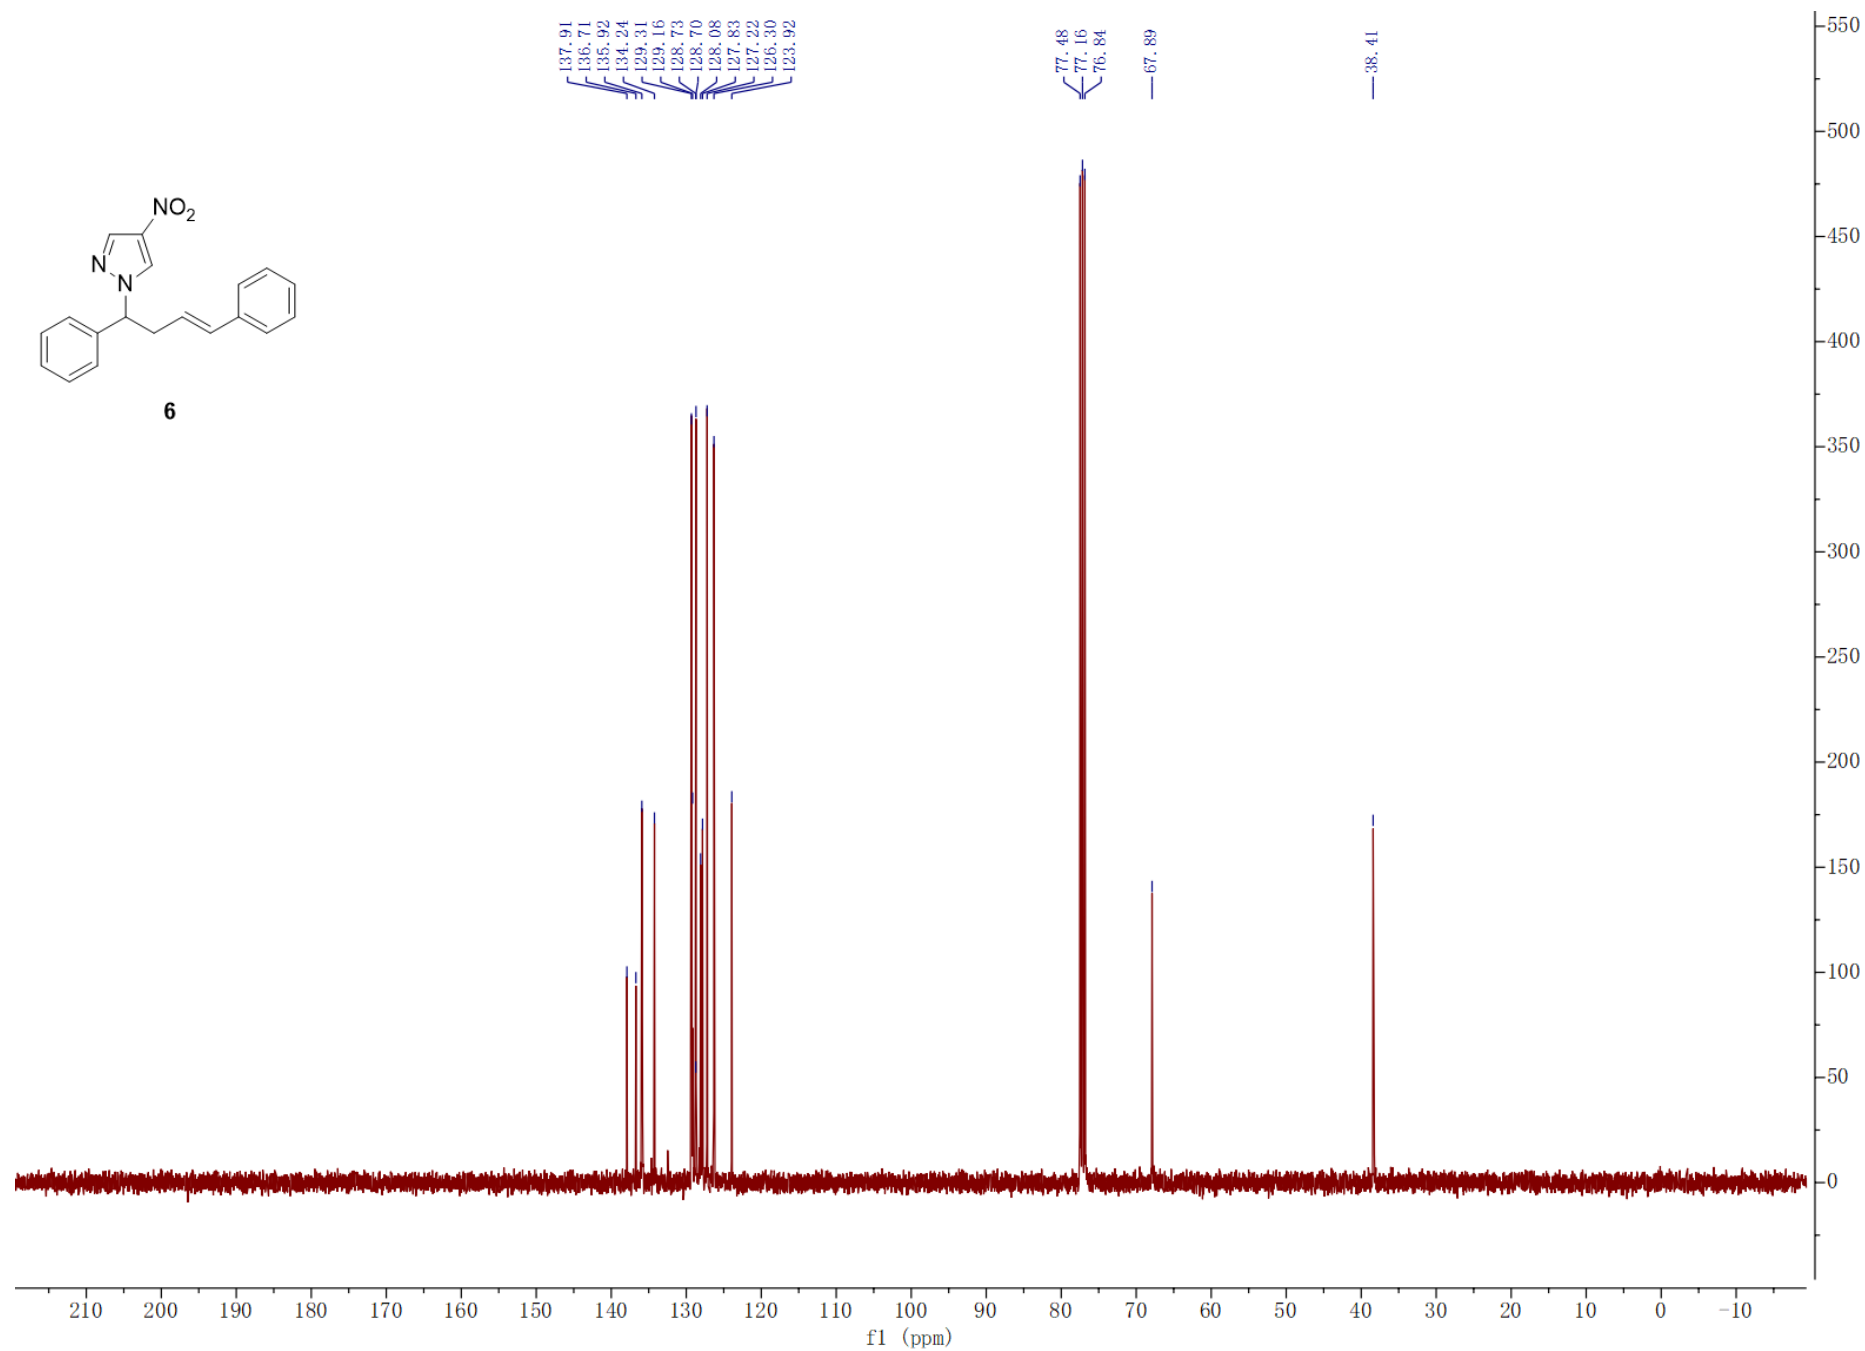

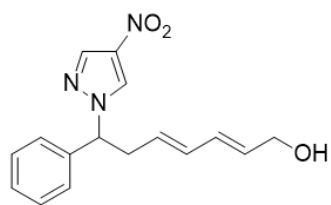

7

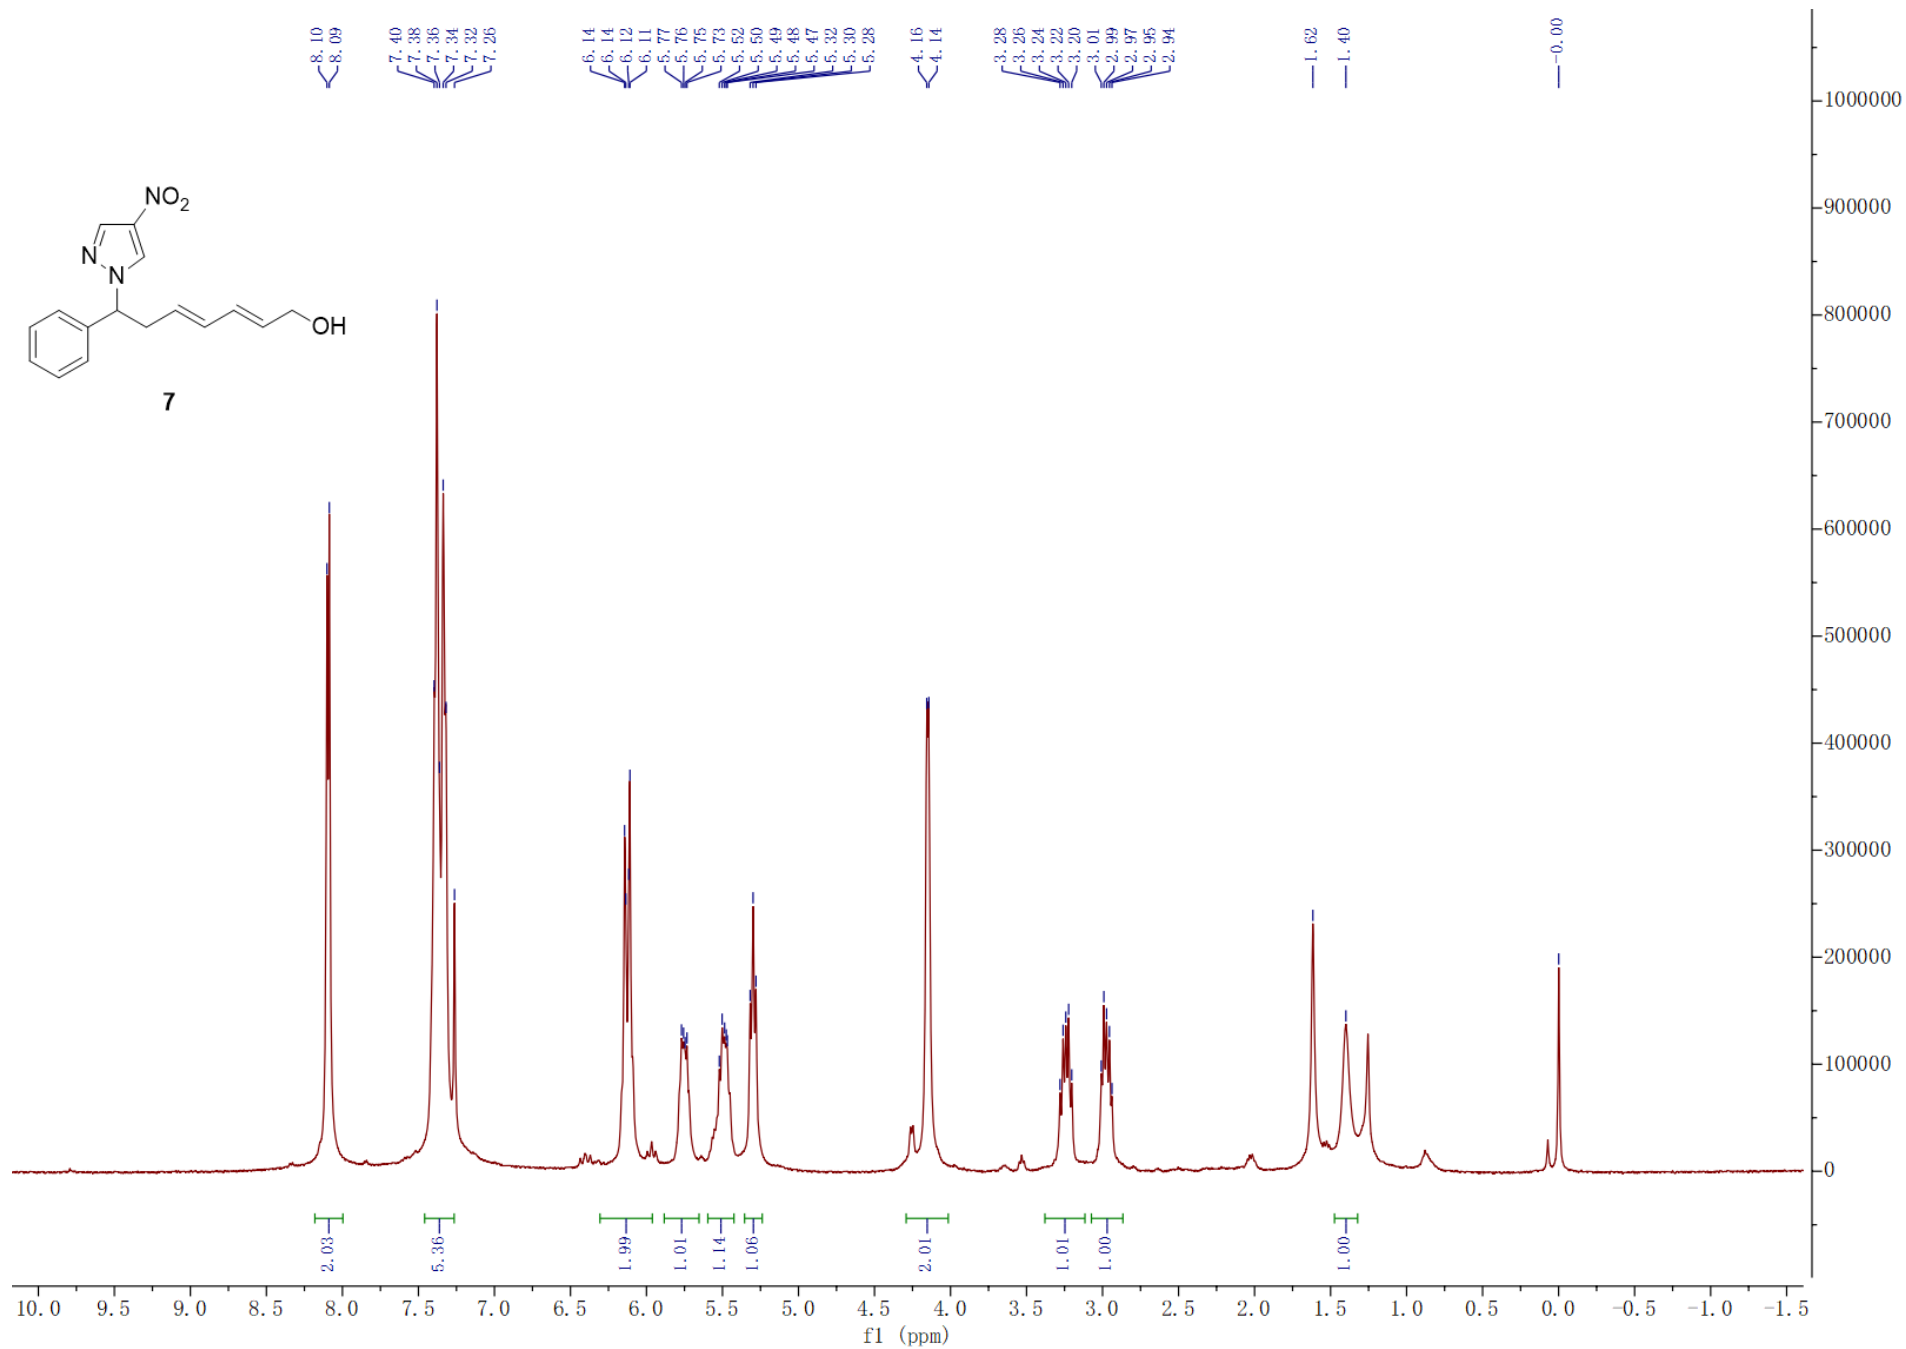

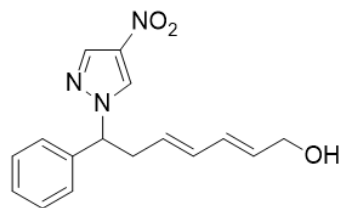

7

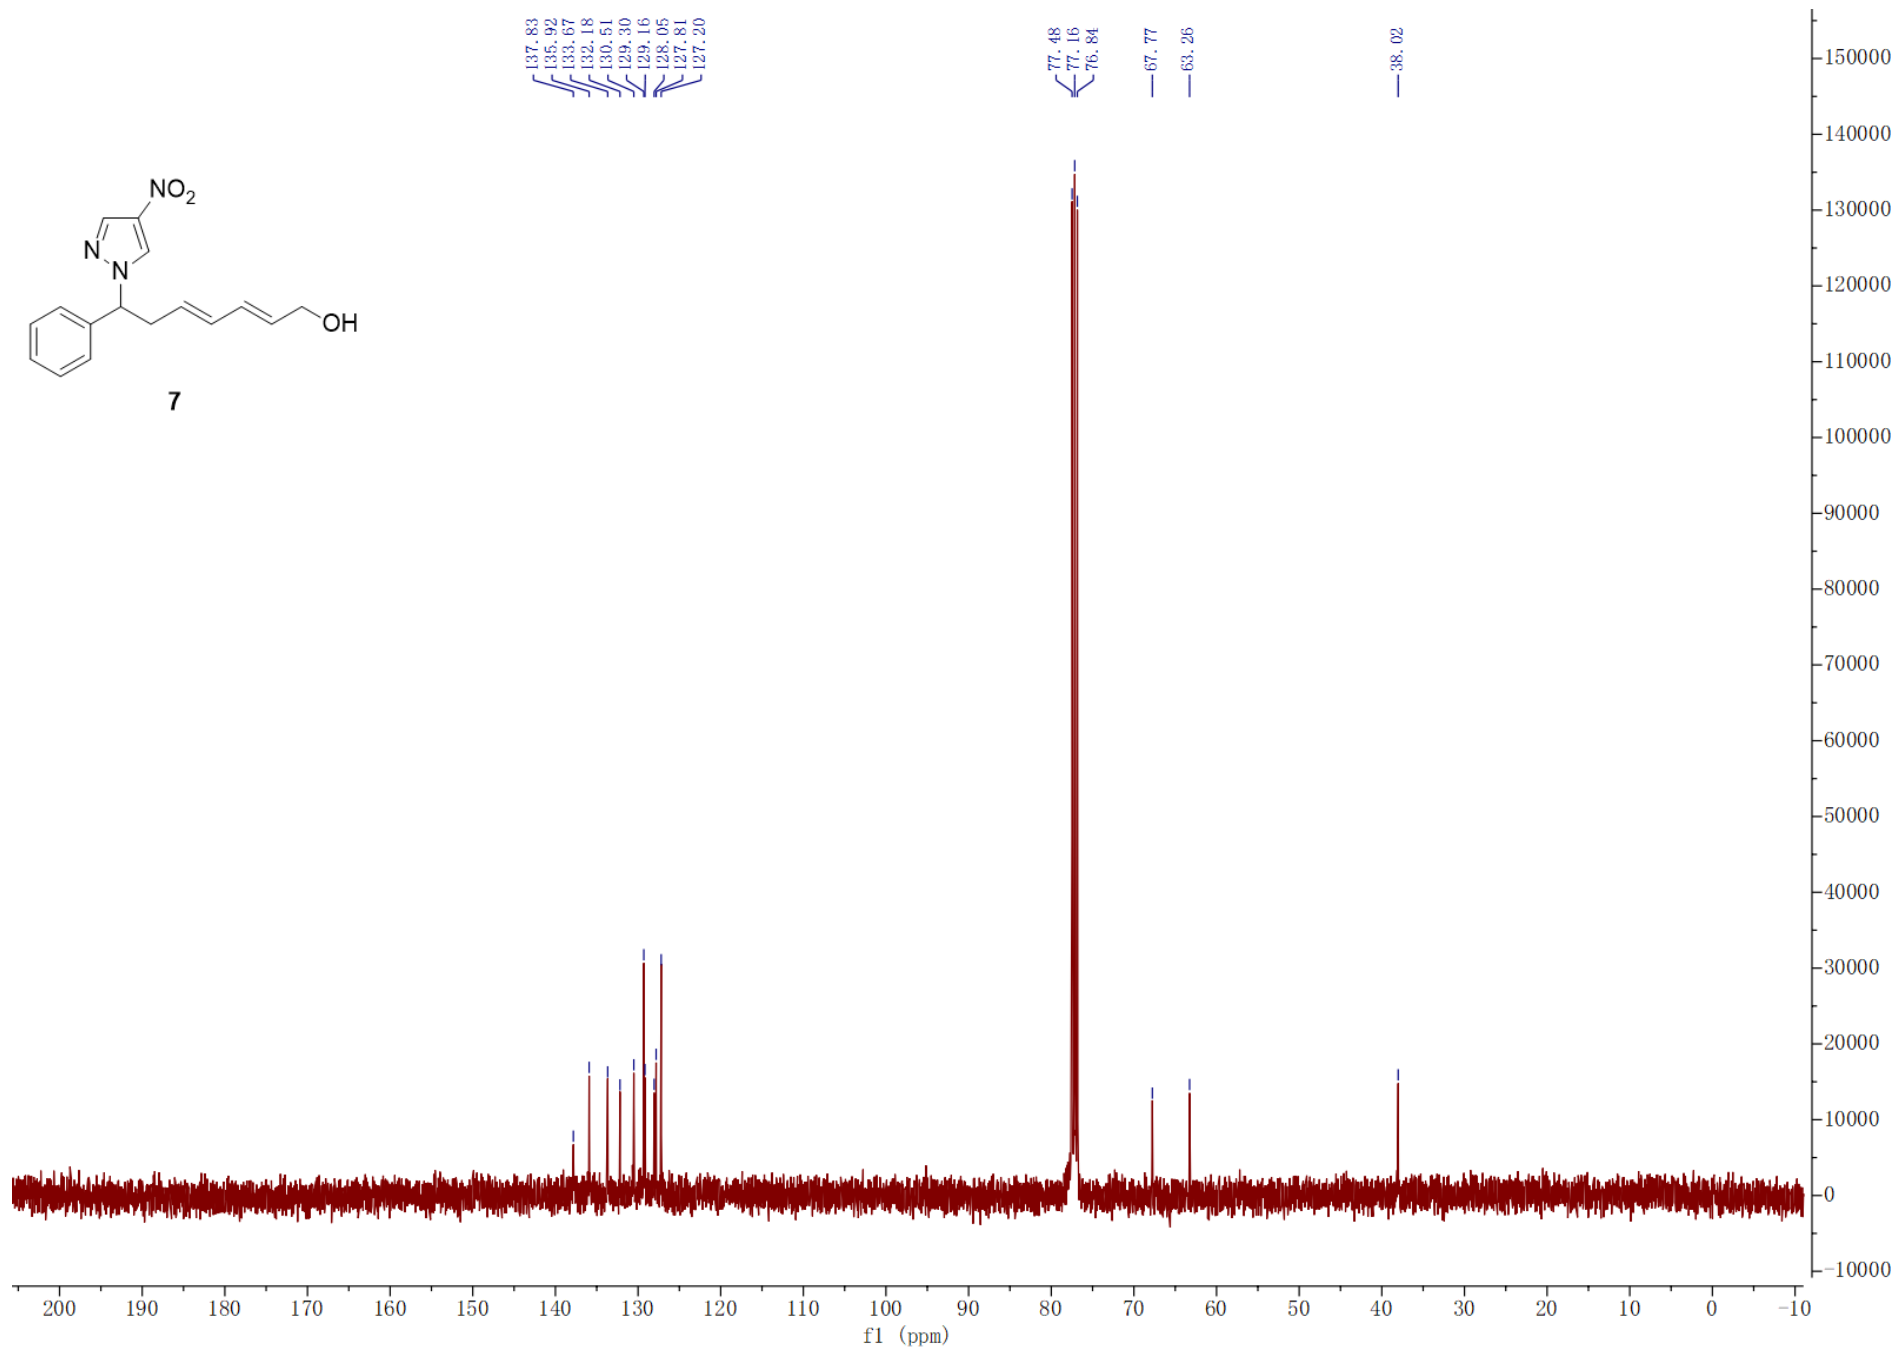

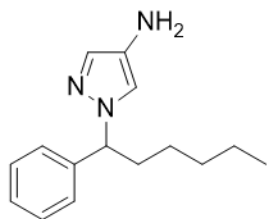

**8**

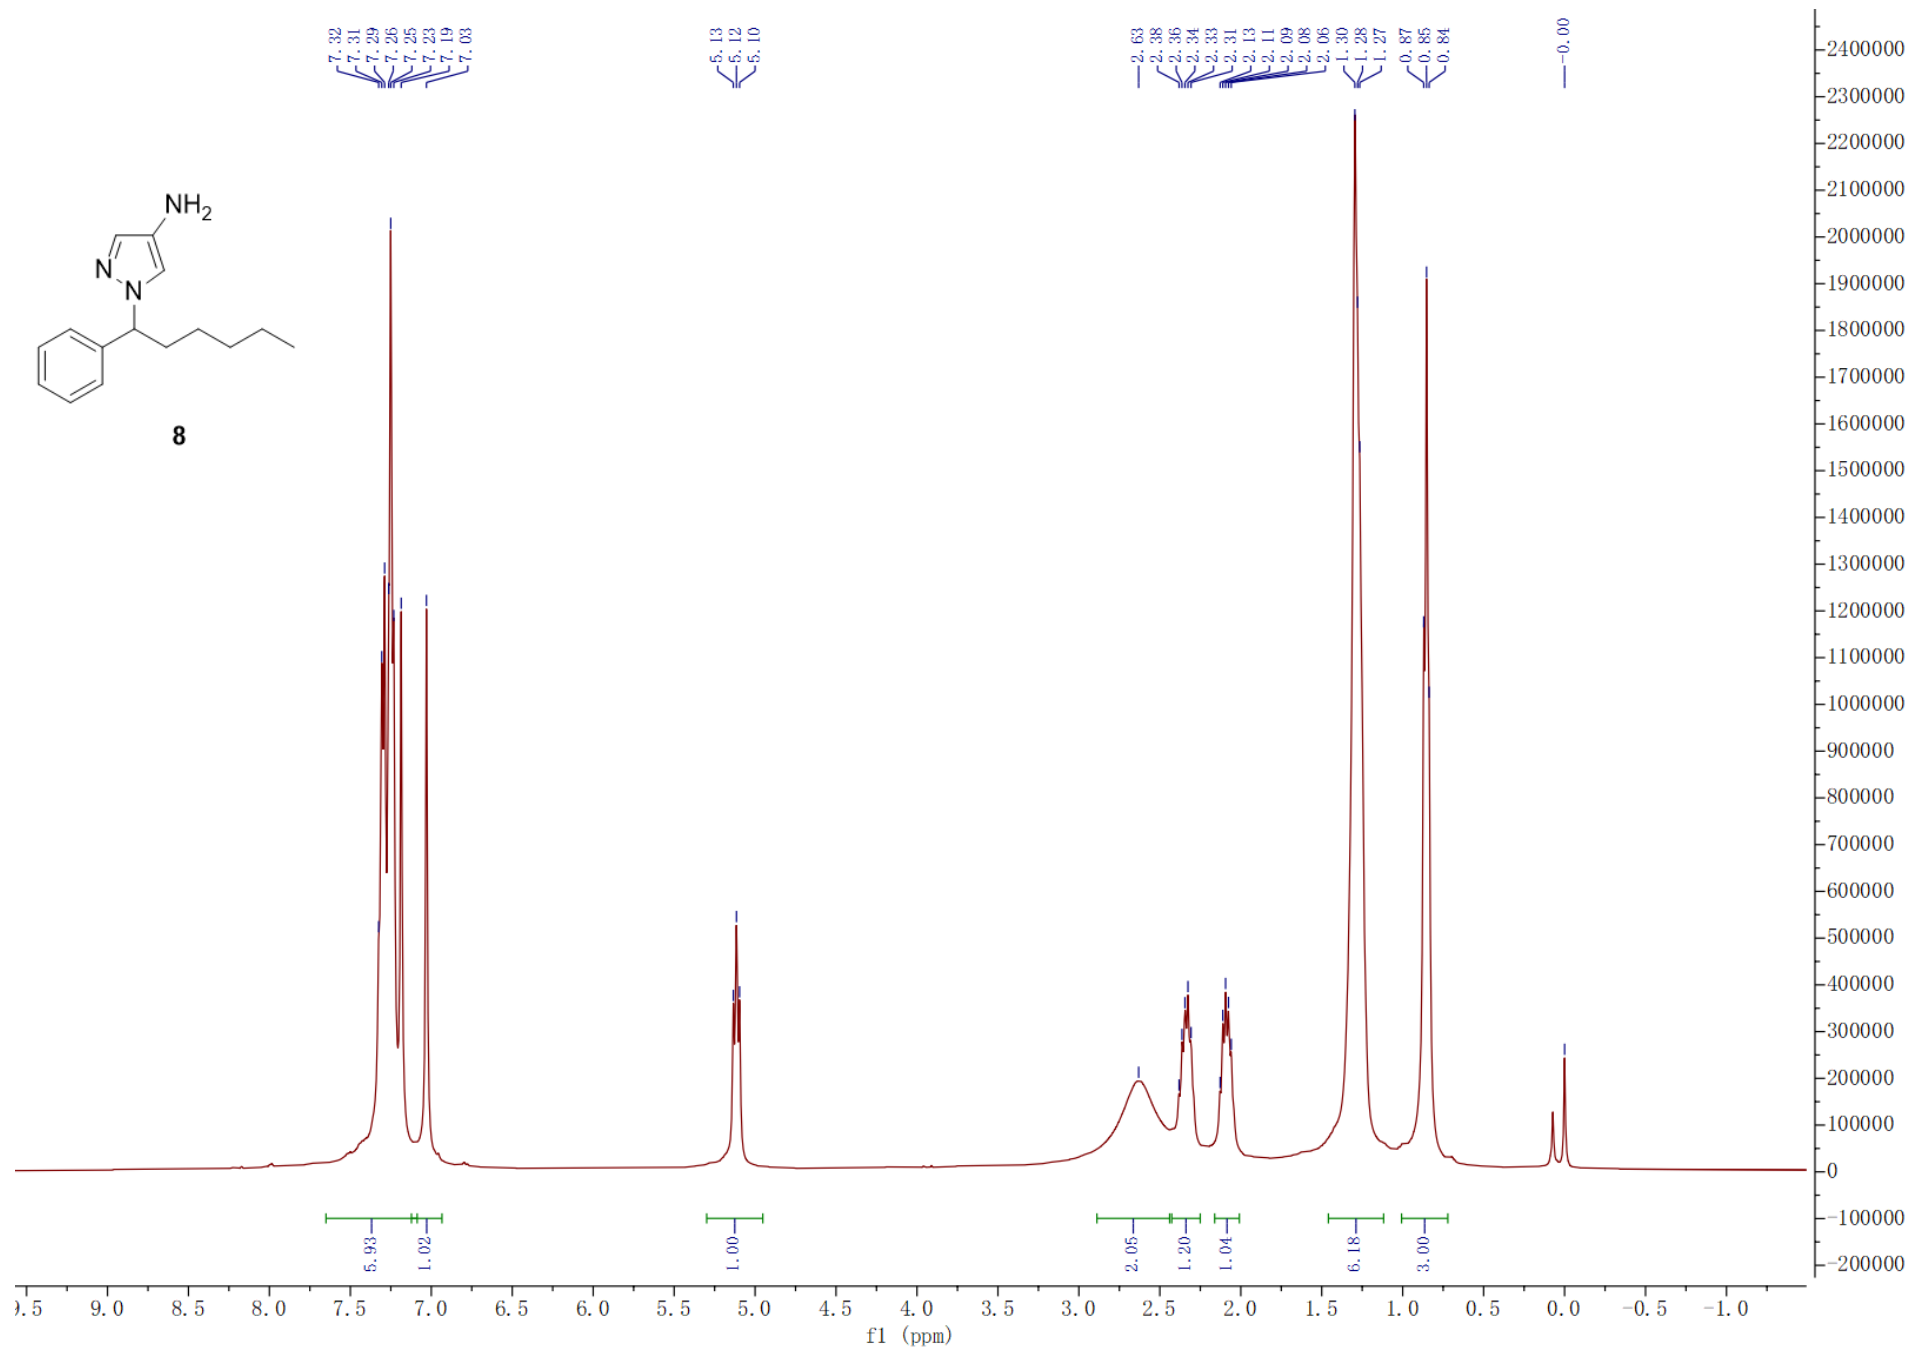



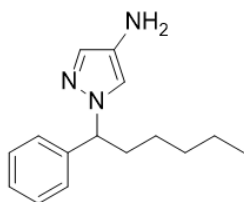

**8**

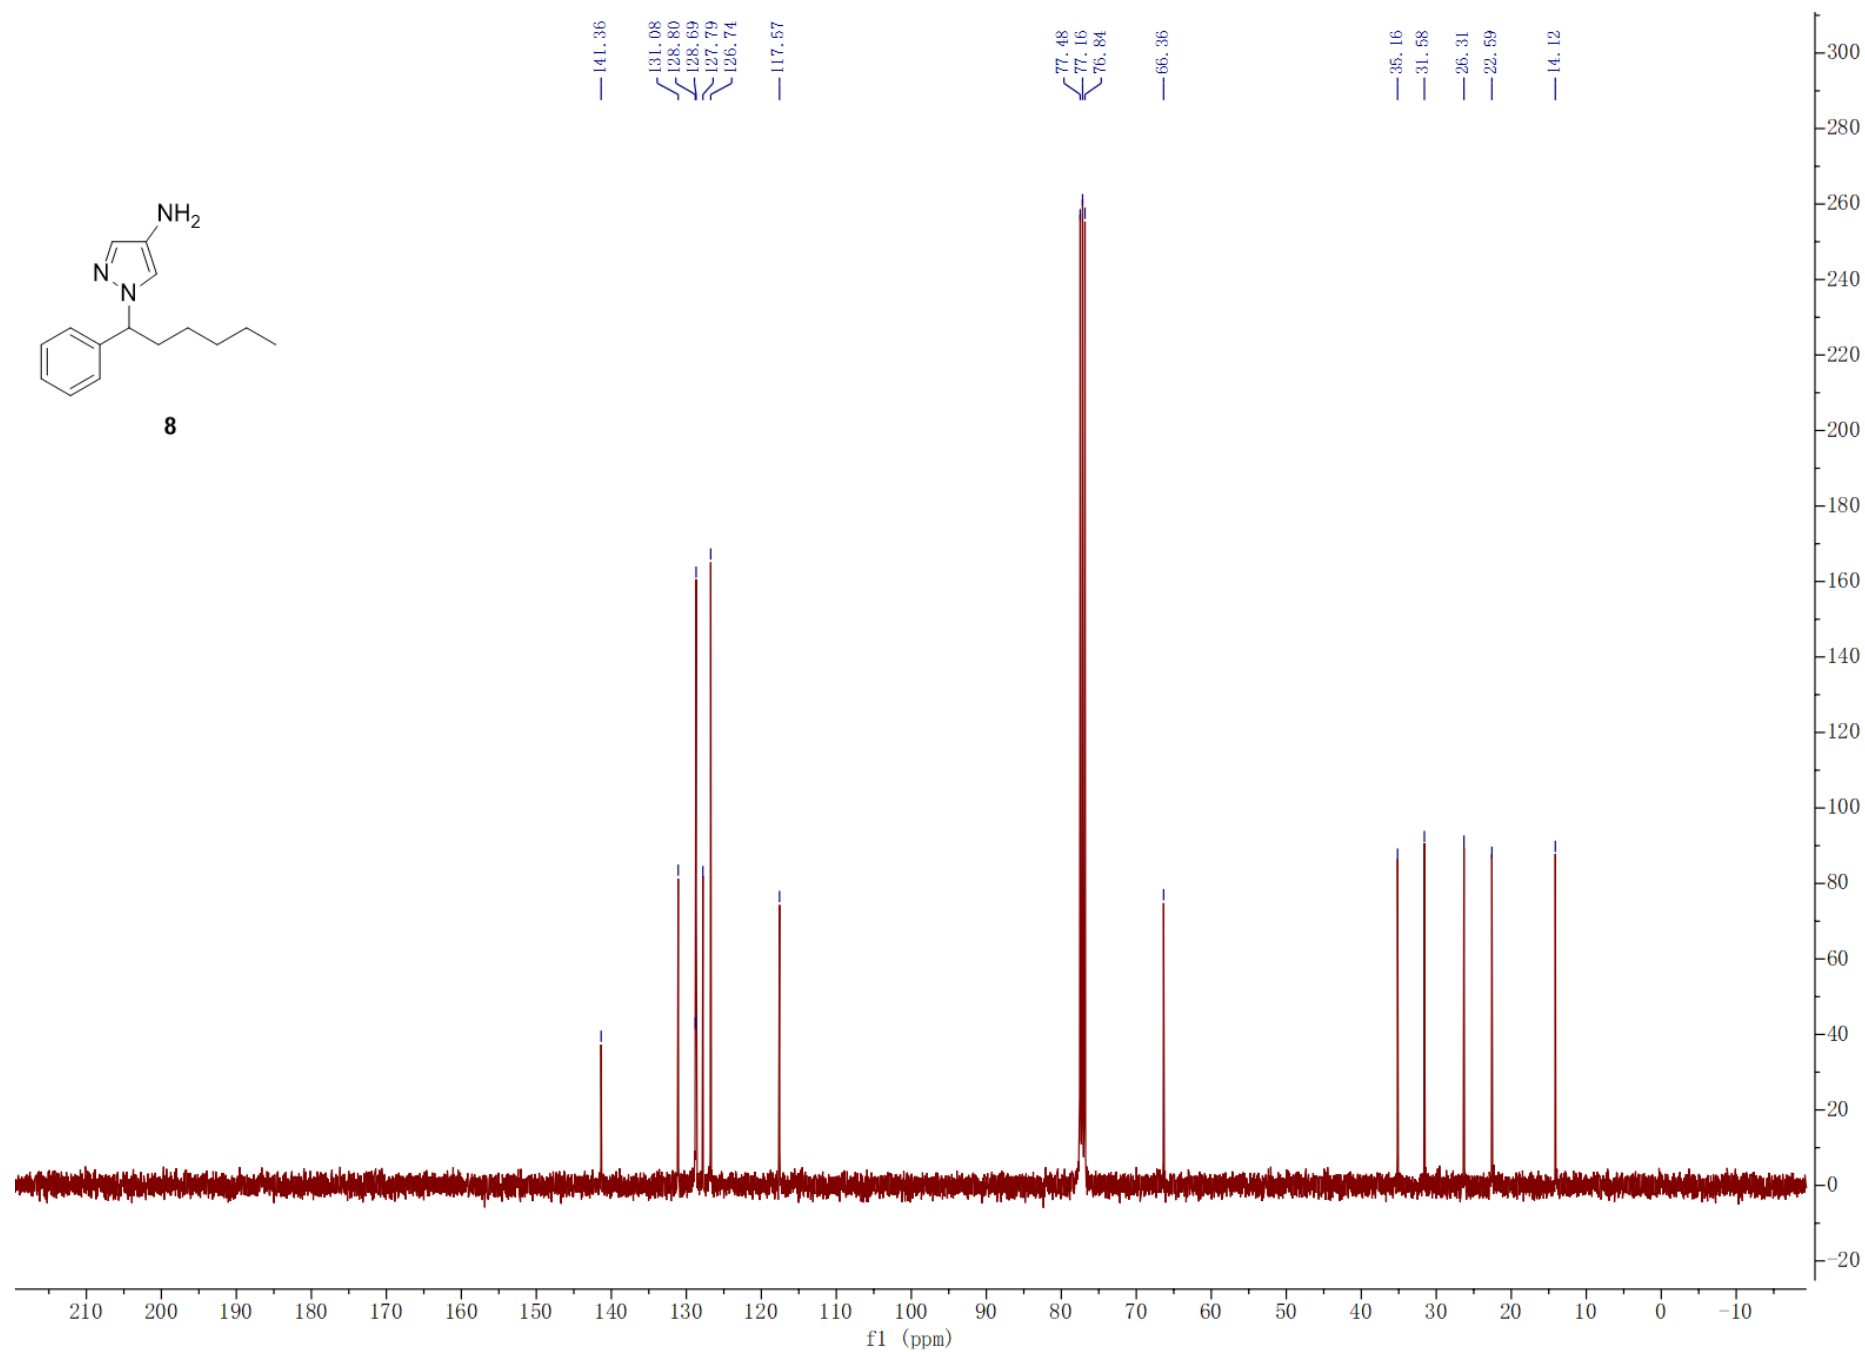

Supplement: d5qo00678c1.pdf [file d5qo00678c1.pdf]
